# Supplementary material for: Simultaneous cyclin D1 overexpression and p27kip1 knockdown enable robust Müller glia cell cycle reactivation in uninjured mouse retina
Source: bioRxiv preprint, doi:10.1101/2024.07.12.603194, version 3 (2025-02-28)
Supplement: Supplementary Table 1_DEG [file 603194_file04.xlsx]

## Sheet: Cell clusters
Gene	BaseMean	log2FC.reactivated.MG_vs_quiescent.MG	log2FC.Rod.like_vs_reactivated.MG	log2FC.Rod_vs_Rod.like	P.adj.reactivated.MG_vs_quiescent.MG	P.adj.Rod.like_vs_reactivated.MG	P.adj.Rod_vs_Rod.like	Pct.quiescent MG	Pct.reactivated MG	Pct.Rod-like	Pct.Rod	Transcription.Factor
Gngt1	3.63	1.31	4.29	1.11	8.80087e-283	0	9.50963e-11	49	73.6	99.5	100	No
Rcvrn	1.71	1.12	4.22	1.38	2.27485e-141	0	2.33931e-13	29.8	48.2	98.6	100	No
Rho	8.6	1.12	4.18	0.77	0	0	8.80117e-06	83.8	93.5	100	100	No
Slc24a1	0.87	0.58	4.09	1.47	8.24552e-30	0	9.50619e-10	20.1	27.6	96.7	100	No
Cnga1	0.79	0.58	4.05	2.14	2.08799e-27	0	9.7615e-17	16.1	23.8	95.9	98.1	No
Rbp3	0.89	0.82	4.04	0.66	5.99012e-61	0	0.0110538	20.6	31.7	96.8	82.7	No
Prph2	2.07	0.99	4.02	1.86	3.9126e-125	0	6.6248e-26	39.5	54.5	99.7	100	No
Gnat1	2.91	1.04	3.97	1.02	8.85419e-199	0	1.31701e-10	53.3	72.2	99.2	100	No
Pde6g	2.23	1.31	3.96	1.15	2.65989e-241	0	3.09975e-12	38.8	63.7	98.7	100	No
Rs1	0.69	0.44	3.91	1.81	1.50888e-17	0	5.61412e-14	18.7	23.8	95.4	98.1	No
Nrl	0.76	0.73	3.81	1.45	6.68274e-50	0	2.86682e-11	17.6	30.5	95.1	96.2	Yes
Pdc	2.39	1	3.8	2.11	2.98805e-149	0	3.49106e-36	46	62.7	99.4	100	No
Rom1	2.26	0.78	3.78	0.99	1.17485e-108	0	2.87481e-10	54	65.6	99.7	100	No
Pde6a	0.84	0.45	3.76	2.74	2.28366e-21	0	1.55699e-53	22.9	29.2	95.7	100	No
Pde6b	0.8	0.39	3.72	2.46	9.81855e-16	0	3.53654e-40	24.4	28.4	95.3	100	No
Rp1	1.23	0.58	3.66	2.91	8.78094e-33	0	1.75788e-44	30.7	35.6	97.5	100	No
Vtn	0.52	0.59	3.63	1.35	2.35338e-28	0	2.40202e-06	12.7	22.9	93.7	90.4	No
Smim40	0.44	0.56	3.55	0.78	1.14844e-21	0	0.0329393	11	21.5	88.8	61.5	No
Guca1b	0.7	0.61	3.48	2.21	2.50191e-38	0	2.86756e-32	20.1	30.4	93.1	100	No
Rtbdn	0.51	0.52	3.48	1.85	7.13153e-22	0	6.35721e-12	14	22.5	91	92.3	No
Prcd	0.42	0.4	3.44	1.36	1.05871e-11	0	7.38123e-05	13.2	19.2	89.3	75	No
Tulp1	1	0.76	3.38	2.37	3.08831e-65	0	5.59294e-48	28.7	41	95.9	100	Yes
Cngb1	0.52	0.45	3.38	2.3	7.49142e-18	0	5.10714e-21	15.6	22.3	93.7	100	No
Sag	3	0.71	3.35	2.83	2.12641e-111	0	8.14195e-94	63.2	75.1	99.7	100	No
Cplx4	0.45	0.37	3.34	2.61	1.76631e-09	4.87196e-250	6.07083e-15	12.9	18.1	86.6	100	No
Nr2e3	0.46	0.4	3.33	2.47	9.28796e-11	4.14879e-258	8.20857e-14	13.7	18.9	84.5	90.4	Yes
Slc17a7	0.47	0.52	3.27	1.57	5.84014e-24	0	9.15159e-10	15.1	23.6	91	94.2	No
Guca1a	1.03	0.89	3.21	1.95	1.70593e-93	0	2.57843e-32	30.3	46.2	95.1	98.1	No
Cdhr1	0.24	0.32	3.11	1.08	0.00103247	1.48691e-71	0.113801	6.7	10.4	78.9	71.2	No
Prom1	0.42	0.33	3.06	3.01	7.31039e-08	1.20548e-225	6.96799e-22	13.9	18	85.3	98.1	No
Aipl1	0.39	0.46	3.06	2.29	5.37926e-14	1.1627e-213	1.12555e-11	11.8	19.1	84.2	98.1	No
Kcnb1	1.15	0.22	3.02	2.35	1.34214e-07	0	7.39747e-43	43.8	44	96.8	100	No
Neurod1	0.44	0.44	3.02	2.7	4.8465e-13	2.82576e-203	5.40119e-16	13.7	19.7	80.6	98.1	Yes
Atp1a3	0.64	0.43	2.95	1.72	1.16068e-21	0	3.78541e-22	29.2	33.6	90.4	86.5	No
Abca4	0.39	0.23	2.89	3.4	0.000979178	1.98796e-135	2.73358e-18	13.5	14.7	80.1	100	No
Impdh1	0.35	0.41	2.77	1.05	1.7883e-12	1.23332e-203	0.00442209	14.8	20.8	79.2	76.9	No
Stx3	0.59	0.43	2.71	1.73	2.16138e-19	0	9.45564e-17	26.3	31.8	88.2	92.3	No
Unc119	2.2	0.5	2.68	1.5	4.50306e-69	0	3.58007e-34	71.4	78	98.9	100	No
Drd4	0.22	0.39	2.64	1.76	7.03029e-05	3.26834e-49	0.0113034	5.8	11.7	71.6	71.2	No
Fam57b	0.77	0.53	2.63	2.52	1.63918e-34	0	2.35892e-60	32.5	40.3	91	98.1	No
Impg2	0.3	0.27	2.61	2.66	0.00144988	2.63816e-69	4.80064e-07	10.9	13.4	68.9	86.5	No
Crx	0.32	0.33	2.57	2.63	3.87478e-07	3.11399e-122	9.9027e-13	13.5	17.5	72.4	98.1	Yes
Impg1	0.25	0.24	2.55	3.56	0.0274419	5.29206e-39	2.54161e-07	7.2	8.9	68.5	96.2	No
Rdh12	0.33	0.27	2.47	2.78	5.25037e-05	2.41774e-104	3.70455e-13	14.4	16.8	71.8	90.4	No
Nxnl2	0.17	0.32	2.43	1.89	0.00890675		0.027067	4.8	9	63.7	65.4	No
AI847159	0.24	0.3	2.41	3.18	0.00243529	6.68115e-40	9.56906e-07	7.4	11.1	63.6	90.4	No
Rgs9	0.93	0.3	2.4	2.65	8.67426e-13	0	2.19033e-60	41.1	44.2	93.1	98.1	No
Nxnl1	0.18	0.26	2.4	2.19	0.0268996		0.0083202	6.2	8.5	62.5	73.1	No
Reep6	0.92	0.16	2.38	0.79	5.77606e-05	0	0.000144393	48.7	48.2	91.6	82.7	No
Grk1	0.28	0.24	2.31	3.06	0.0012878	2.78299e-71	2.35069e-12	13.2	14.6	66.2	88.5	No
Ptp4a3	0.61	0.55	2.3	1.63	8.78752e-35	0	6.97092e-16	29.9	37	84.5	84.6	No
A930003A15Rik	0.18	0.31	2.28	1.83	0.00461434		0.0182107	6.3	10.3	61.5	63.5	No
Gucy2e	0.17	0.3	2.27	2.25	0.00999197		0.00551291	6	9.3	60.7	76.9	No
Hcn1	1	-0.08	2.24	5.41	0.188113	6.04306e-185	5.01172e-135	34.4	29.8	77.9	100	No
Fabp12	0.2	0.27	2.24	3	0.0179516	1.28483e-26	8.32742e-05	6.4	9.3	61	92.3	No
Elovl4	0.74	0.07	2.22	1.42	0.1247	0	9.01415e-13	42.6	40	88.6	84.6	No
Ppp2r2b	0.64	0.29	2.17	5.12	3.73127e-07	5.92875e-127	6.98818e-84	20.9	22.5	72.1	100	No
Rp1l1	0.17	0.23	2.15	2.78	0.06232		0.00112859	6.2	7.8	59.3	82.7	No
Kcnj14	0.15	0.26	2.14	1.85	0.047141		0.041198	5.6	7.9	58.2	59.6	No
Tma7	6.24	0.36	2.11	0.68	5.98397e-96	0	5.51894e-11	97.4	98.4	99.8	100	No
Gnb1	5.95	0.21	2.09	1.86	2.82331e-30	0	3.50808e-88	97.7	97.7	99.7	100	No
Cabp4	0.16	0.26	2.07	2.42	0.0359183		0.00505248	6.1	8.5	56.3	78.8	No
Cds1	0.16	0.22	2.07	2.03	0.0666789		0.0131887	7.5	8.6	59	57.7	No
Hk2	0.63	0.42	2.05	2.22	9.78308e-16	5.87717e-137	7.17442e-16	29.1	32.1	77.1	80.8	No
Rgs9bp	0.2	0.21	2.04	2.4	0.0354328	4.83925e-31	0.000213701	10.2	11	57.3	80.8	No
Pex5l	0.59	0.06	2.02	5.37	0.342144	4.58753e-101	2.49538e-88	22.4	20.2	66.2	100	No
Vldlr	0.22	0.2	1.99	1.84	0.025251	4.94364e-36	0.00247432	12.3	12.8	55.8	63.5	No
Gm48236	0.15	0.23	1.91	2.45	0.113489		0.0155387	5.8	7.3	44.6	53.8	No
Osbp2	0.42	0.27	1.9	3.05	3.21314e-06	3.14984e-93	3.06959e-26	21.1	23.3	69.9	92.3	No
Ccdc126	0.24	0.22	1.89	2.46	0.00503645	2.2418e-42	4.00762e-07	13.6	14.6	57.4	73.1	No
Ybx3	1.36	0.25	1.86	1.32	1.56123e-14	0	2.939e-14	62.6	63.4	93.4	96.2	Yes
Arl6	0.5	0.29	1.86	2.22	1.19012e-09	1.44479e-160	2.16369e-24	29.3	32.7	71.6	71.2	No
Gnb3	0.47	0.5	1.85	2.03	3.09765e-24	2.22991e-139	1.34953e-16	25.8	32.5	66.7	53.8	No
Ubap1l	0.15	0.22	1.84	2.36	0.109061		0.0109586	6.5	7.8	48.9	63.5	No
Map1b	1.83	0.91	1.84	2.16	1.04673e-116	9.59541e-167	6.68483e-21	49.1	61.9	97.3	100	No
Ankrd33b	0.17	0.23	1.82	3.66	0.105314		0.000118089	5.6	7	48.6	94.2	No
Mpp4	0.24	0.24	1.79	3.2	0.00260991	9.11319e-37	7.25366e-12	13.2	14.5	56.3	90.4	No
Lbhd1	0.15	0.22	1.78	2.25	0.0626638		0.00598871	8	9.2	50	65.4	No
Syt1	1.68	0.3	1.69	4.58	2.45987e-14	9.64539e-156	5.43005e-129	57	56.2	91.6	100	No
Cacna2d4	0.22	0.24	1.69	3.84	0.0113294	1.14774e-22	1.29799e-11	10.7	12.1	52.1	90.4	No
Samd11	0.2	0.22	1.67	3.71	0.0400281	4.10297e-17	3.26026e-08	9.2	10.2	49.5	90.4	No
Syp	0.36	0.22	1.65	2.14	2.28748e-05	3.97297e-88	5.11547e-15	23.4	24.5	64	67.3	No
Snap25	0.73	-0.18	1.59	2.81	1.20969e-05	2.58022e-170	2.76599e-75	49.5	40.3	78.7	98.1	No
Slc6a6	2.36	0.28	1.59	1.5	5.71112e-25	1.70645e-285	7.90607e-22	80.1	78.5	97.2	96.2	No
Bicdl1	0.27	0.4	1.59	3.19	1.84139e-07	1.65306e-28	1.31899e-11	13.2	16.3	54.1	78.8	No
Kcnv2	0.1	0.2	1.57	2.34	0.237968		0.0454688	4.8	5.3	44.8	57.7	No
Cdr2	0.13	0.24	1.57	2.9	0.108435		0.00555108	5	6.8	47	65.4	No
Guk1	0.88	0.23	1.56	0.6	8.3765e-11	1.60992e-242	0.0115715	52.6	54.6	87.2	59.6	No
Sncb	0.39	0.25	1.54	1.55	4.39246e-07	8.38363e-91	4.44515e-08	26.9	27.7	62.8	67.3	No
Susd3	0.11	0.24	1.51	3.2	0.161347		0.00755514	3.5	5.7	44.6	76.9	No
Mak	0.21	0.2	1.51	3.98	0.0630149	1.51355e-13	3.48296e-09	9.8	10.4	43.7	92.3	No
Pitpnm2os2	0.12	0.24	1.5	2.62	0.114627		0.0146153	4.7	6.9	44.5	63.5	No
Mir124-2hg	0.72	0.13	1.48	3.84	0.00623335	1.86705e-117	5.8962e-125	40.5	38.9	73.3	100	No
Adcy1	0.12	0.19	1.48	2.55	0.192144		0.0115183	6.6	6.9	43.1	61.5	No
Rpgrip1	0.82	0.16	1.47	4.9	0.000711936	6.20264e-107	2.19689e-208	39.1	38.7	66.9	100	No
Pdzph1	0.4	0.05	1.45	5.81	0.575558	1.78761e-21	1.49024e-36	15.6	13.5	45.1	100	No
Icmt	0.27	0.18	1.43	1.84	0.00374159	3.86176e-40	2.82902e-06	19.8	19.4	50.5	59.6	No
Lyar	0.58	0.24	1.43	1.28	7.77711e-08	9.19929e-108	6.64735e-07	37.6	38.1	70.8	53.8	Yes
Grtp1	0.18	0.2	1.41	2.54	0.0330598		4.24045e-05	11.7	12.3	47.3	63.5	No
Mef2c	0.66	-0.14	1.41	3.46	0.03144	3.57739e-39	1.48273e-24	30.5	27.6	62.5	92.3	Yes
Agpat3	2.43	-0.13	1.4	1.86	4.51606e-08	0	6.20848e-57	89	82.2	98.1	100	No
Adipor1	1.19	0.18	1.39	1.06	8.78622e-09	4.70972e-205	1.75563e-08	63.1	63.8	89	75	No
Stxbp1	0.82	0.03	1.38	2.39	0.490145	2.6207e-116	9.52217e-39	48.7	46	79.8	90.4	No
Lgalsl	1.18	0.06	1.37	1.2	0.0818872	1.99141e-169	8.13594e-10	63.7	60.2	89.3	76.9	No
Tdrd7	0.62	-0.18	1.35	2.54	0.000112815	1.01864e-71	3.06095e-28	39.6	34.9	68	78.8	No
Sgk1	0.18	0.42	1.31	3.01	0.000126593		8.9808e-05	7.4	11.4	43.5	71.2	No
Gpsm2	0.35	0.1	1.31	2.83	0.122587	6.07514e-38	1.91468e-19	23.9	22	50.3	61.5	No
Zdhhc2	0.19	0.12	1.29	4	0.281856	9.73651e-10	5.36744e-09	10.9	9.4	42	84.6	No
C2cd2l	0.21	0.17	1.29	2.14	0.0279795	9.79967e-20	2.36822e-05	15.6	15.1	47.6	57.7	No
Egflam	0.15	0.19	1.26	4.26	0.191908		7.91666e-06	6.5	7	38.5	88.5	No
Got1	0.33	0.13	1.26	1.78	0.0138108	2.11517e-46	1.70192e-08	25.7	23.8	55.5	53.8	No
Fam161a	0.29	0.17	1.25	4.09	0.0121124	3.93054e-23	5.14216e-28	17.6	17.4	46.4	98.1	No
Pacsin2	0.27	0.28	1.25	2.62	2.66558e-05	1.8208e-23	1.67119e-10	16.6	18.8	50.6	71.2	No
Gm45716	0.21	0.24	1.2	4.53	0.0230835	5.23996e-09	3.20628e-12	9.3	11.2	42.4	88.5	No
Pla2g7	0.47	0.01	1.2	2.14	0.883333	7.82107e-25	1.12166e-07	26	23.5	57.9	69.2	No
Faim	0.73	0.14	1.19	1.74	0.000415034	4.86335e-106	1.2864e-20	48.5	47.7	74.9	67.3	No
Otx2	0.12	0.24	1.19	3.41	0.134703		0.00219921	5	7	34.4	69.2	Yes
Pitpnm1	0.4	0.15	1.19	1.72	0.00149496	1.10938e-57	7.99388e-11	30.5	29.3	59.1	55.8	No
Esrrb	0.15	0.19	1.17	4.27	0.200855		1.26506e-05	6.4	6.9	36.8	90.4	Yes
Zfp385a	1.34	0.13	1.17	0.82	1.26904e-05	8.29606e-150	8.9808e-05	68.5	67.5	90.2	65.4	Yes
Dscaml1	0.31	0.21	1.13	5.19	0.00760906	2.50083e-14	4.1321e-33	14.6	15.8	42.7	98.1	No
Tub	0.14	0.2	1.12	3.91	0.1558		1.18703e-05	7.5	7.9	36.3	82.7	Yes
Amer2	0.59	-0.42	1.1	2.44	5.26904e-23	4.47178e-49	2.69794e-27	46.5	33.2	59	73.1	No
Pitpnm3	0.15	0.21	1.08	4.23	0.135801		2.37444e-06	7.1	7.9	36.8	84.6	No
Plxna2	0.14	0.25	1.07	3.61	0.11502		0.000719938	5.8	7.3	32.6	59.6	No
Pfkfb2	0.44	0.06	1.07	3.32	0.235774	5.89147e-38	1.13173e-51	30.9	28.4	51.7	84.6	No
Rims2	0.99	-0.12	1.06	5.12	0.00898796	1.63935e-50	2.54531e-193	49.2	42.2	68.6	100	No
Hmgn1	6.61	0.28	1.06	1.04	8.06175e-78	0	1.558e-25	98.4	98.9	99.8	98.1	No
Snap91	0.19	0.14	1.06	4.06	0.182287	4.07698e-08	1.71035e-11	12.3	11.1	39.3	88.5	No
Zfp385b	0.66	1.56	1.06	3.72	1.52533e-105	7.2085e-14	2.66423e-16	15.8	27.9	53.6	92.3	No
Tnfaip3	0.15	0.19	1.05	2.86	0.114291		0.000473927	9	9.9	36	59.6	No
Vopp1	0.47	0.28	1.04	2.75	3.85441e-08	4.79409e-33	2.895e-26	28.2	30.9	58.4	75	No
Me1	0.29	0.15	1.04	2.25	0.0251318	1.066e-16	1.37366e-07	20.2	19.2	45.3	57.7	No
Ndufa4	5.54	0.27	1.03	0.22	1.88141e-66	0	0.114084	98.2	98.4	100	86.5	No
Dpysl3	0.9	0.38	1.02	3.14	9.40401e-19	1.86967e-44	5.16718e-48	42.7	46.7	77.8	96.2	No
Gnb5	1.11	0.1	1.02	2.91	0.00419898	1.23129e-92	1.13038e-109	61.7	60.5	83.3	92.3	No
Ebpl	1.23	0.04	1.01	1.55	0.221575	1.65863e-102	2.02446e-19	68.2	65.1	84.7	73.1	No
Atp8a2	0.33	0.13	0.99	5.1	0.1151	4.56173e-10	6.52056e-28	16.1	15	39.4	100	No
Ssu72	1.75	0.14	0.99	1.14	5.32449e-08	5.7423e-144	9.32048e-13	80.1	78.6	93.7	69.2	No
Dgke	0.34	0.07	0.99	2.96	0.265838	1.367e-20	6.70431e-21	24.6	22.1	46.5	75	No
Cep290	0.88	0.05	0.98	2.71	0.287743	1.16207e-33	7.12357e-27	43.4	42.6	67.5	84.6	No
Pacsin1	0.42	0.43	0.98	2.4	5.40015e-18	3.90178e-29	1.03993e-18	25.4	30.3	54.3	67.3	No
Cst3	7.02	0.43	0.97	0.79	2.47314e-153	5.2792e-251	1.31127e-11	99.1	99.1	99.7	98.1	No
Slc16a6	0.25	0.21	0.96	3.47	0.00454281	1.61233e-11	1.19921e-15	16.4	16.8	42.3	76.9	No
Dyrk2	0.42	0.11	0.96	1.62	0.0269612	5.41404e-32	9.94563e-08	31.7	30	50.3	46.2	No
Ipmk	0.4	0.26	0.96	2.35	6.18538e-07	5.65398e-25	1.20828e-15	26.2	27.8	51.9	63.5	No
Snhg6	0.46	0.19	0.95	0.42	4.3671e-05	3.31253e-36	0.238999	33.3	34.4	55.8	26.9	No
Uqcc3	0.88	0.26	0.95	0.73	2.93319e-14	1.75339e-80	0.00516254	54.4	58	82.6	51.9	No
Glcci1	0.27	0.27	0.95	2.99	0.000670411	9.18125e-10	1.28103e-09	15.1	17.3	41.6	67.3	No
Cited2	0.82	0.45	0.94	1.4	2.81355e-17	1.75779e-21	0.000214184	35.9	41	65.1	63.5	No
Ndufs2	1.71	0.25	0.93	1.07	1.27518e-24	1.63254e-132	5.11216e-11	77.1	79.9	93.8	82.7	No
Rasgrf2	0.18	0.16	0.93	4.91	0.245796		2.60993e-09	8.5	8	33.4	100	No
Agtpbp1	0.99	0.08	0.93	2.81	0.060259	9.65026e-43	3.73326e-44	52	51.4	71.3	76.9	No
Ppa1	0.72	-0.02	0.92	1.16	0.690839	1.84527e-47	1.82902e-05	49.9	45.8	69.7	51.9	No
D16Ertd472e	0.25	0.1	0.9	2.75	0.196658	2.43164e-10	1.59355e-09	18.6	16.4	39.7	55.8	No
Hk1	1.83	0.05	0.89	1.36	0.100361	1.18727e-95	1.34156e-16	79.3	76.9	92.6	84.6	No
Smim13	0.34	0.16	0.89	2.33	0.00336834	4.70535e-19	2.90886e-13	24.7	24.4	46.1	51.9	No
Fhod3	0.21	0.16	0.88	4.95	0.167339	0.000217439	5.00988e-12	10	10.3	32.2	86.5	No
Frmpd1	0.34	0.34	0.88	2.77	4.19996e-07	2.0753e-11	2.17026e-11	17.9	22	43.5	61.5	No
Cacnb2	0.55	0.2	0.87	6.28	0.00310945	2.27948e-11	1.17225e-70	22.3	19.9	36.4	100	No
Pkm	6.19	0.14	0.87	0.41	3.98745e-20	3.86527e-231	0.00229297	98.8	98.6	99.8	94.2	No
Pmvk	0.69	0.01	0.86	-0.18	0.839736	6.38969e-42	0.58973	49.6	46.1	63.4	17.3	No
Slc25a5	1.41	0.37	0.86	0.29	2.98942e-37	1.16826e-73	0.261019	67.3	71.3	90.4	53.8	No
Pcmtd2	1.61	-0.01	0.86	2.7	0.732719	2.13825e-76	6.91176e-94	75.7	71.7	90.1	90.4	No
Ldha	2.94	0.48	0.85	1.09	3.86504e-96	1.78841e-103	2.24903e-12	86	89	97.9	94.2	No
Pcbp4	1.17	0.09	0.85	1.2	0.00370054	1.37765e-64	6.56421e-09	65.2	63.7	83	78.8	No
Grm8	0.34	0.25	0.85	5.37	0.00527723	2.69756e-06	1.16132e-24	17	14.2	23.8	90.4	No
Madd	0.35	0.1	0.84	3.35	0.102511	1.32015e-16	4.31478e-33	25.3	23.2	45.9	88.5	No
Cpe	4.57	0.26	0.83	0.39	8.29616e-42	9.69614e-135	0.0183906	95.5	95.7	99.7	82.7	No
Sv2b	1.19	0.47	0.83	2.49	2.59753e-19	5.74391e-16	2.54249e-13	38.4	44.7	73.3	90.4	No
Aldoa	7.94	0.18	0.83	0.79	1.10325e-30	2.08408e-176	2.74412e-11	99.2	99.3	99.8	96.2	No
Oip5os1	1.87	-0.11	0.81	1.06	4.50637e-06	4.10079e-85	2.4518e-09	82.7	77.7	93.1	82.7	No
Mrpl54	0.68	0.34	0.81	0.54	9.76709e-20	7.01343e-42	0.084771	45.5	49.3	69.9	36.5	No
March1	1.57	-0.85	0.8	5.93	1.4023e-45	4.08658e-10	5.33145e-54	45.3	30.6	62.8	100	No
Scamp5	0.44	0.06	0.8	1.64	0.204369	1.83354e-23	2.78153e-08	33.5	32.2	53.9	42.3	No
Cdk2ap2	0.69	0.4	0.79	0.8	3.5439e-25	4.41206e-37	0.00834232	43.1	49	70	40.4	No
Gnaz	0.21	0.08	0.79	2.17	0.300746	2.74694e-07	4.15986e-05	17.5	15.1	36.6	51.9	No
Ush2a	0.4	0.1	0.78	6.33	0.263777	2.66476e-06	6.07797e-43	16.7	15	27.6	100	No
Ndrg3	1.26	0.04	0.78	2.54	0.281583	7.55565e-49	1.77313e-61	67.1	63.4	82.3	94.2	No
Laptm4b	1.62	0.08	0.77	1.67	0.00609107	4.1091e-65	1.34028e-25	76.1	73.5	90.4	78.8	No
Snrk	0.7	0.02	0.77	1.02	0.725687	1.56166e-30	0.000742148	48.1	44.6	66.2	50	No
Slc12a5	0.26	0.14	0.77	2.67	0.0209086	7.21238e-11	1.95071e-13	20.7	20	41.3	63.5	No
Arhgap24	0.21	0.37	0.77	4.02	0.000525646	0.000943939	1.15937e-08	9.7	12.1	30.9	80.8	No
Mdm1	0.18	0.14	0.76	3.55	0.168361		6.64065e-09	13.3	11.8	33.1	69.2	No
Rab3a	0.49	0.1	0.75	0.78	0.0362303	7.39601e-25	0.0209866	38.5	36.6	58.4	36.5	No
Dynll1	1.91	0.76	0.75	-0.01	5.3118e-149	4.56624e-50	0.972417	68.6	79.3	92.4	53.8	No
Dnttip2	0.78	0.19	0.75	1.1	5.03408e-07	2.46021e-33	5.5218e-05	51.1	50.3	66.7	51.9	No
Pcsk1n	1.16	0.49	0.75	0.17	2.90114e-42	1.44373e-31	0.607491	53.4	59.5	83	40.4	No
Tln2	0.53	0.12	0.75	2.9	0.0414221	5.05456e-13	2.50622e-21	31	30.9	49.7	76.9	No
Klhl18	0.46	0.1	0.74	3.32	0.0659177	8.92546e-15	6.26078e-39	30.2	29.3	50.6	80.8	No
Gm17018	0.6	0.31	0.73	0.46	7.35087e-15	5.47796e-28	0.167406	40.6	44.1	62.6	30.8	No
Mef2d	1	0.02	0.73	1.72	0.555331	2.39724e-36	1.73569e-17	60.5	56.4	78.2	75	Yes
Efnb2	1.33	1	0.72	-1.98	3.82338e-64	2.22609e-09	0.000135356	34.8	44.2	55	3.8	No
Herc3	1.15	-0.24	0.71	3.07	2.06569e-11	2.25865e-27	2.08754e-63	62.8	53	75.7	94.2	No
Lhfpl3	0.41	0.2	0.71	5.9	0.0262801	0.000172772	6.91954e-29	15.8	14.9	30.3	96.2	No
Casz1	2.01	0.3	0.7	2.36	3.19805e-27	8.64201e-45	1.4428e-50	75.4	76.7	91.2	100	Yes
Hmgb2	1.01	0.96	0.7	0.62	2.04023e-119	1.86956e-22	0.0598571	40.9	57.6	75.6	46.2	Yes
Polg2	0.31	0.53	0.7	2.02	8.83656e-19	9.88924e-09	1.09267e-06	18.1	24.4	42.1	55.8	No
Bbs7	0.64	-0.04	0.69	3.17	0.406202	9.99906e-16	5.42228e-41	40	36.7	57.4	80.8	No
Pgam1	3.32	0.23	0.69	0.14	2.84119e-33	1.70004e-100	0.443711	93.4	93.5	97.9	75	No
Mllt6	0.68	-0.01	0.69	0.81	0.878525	2.50457e-26	0.00997243	49.6	45.3	65.5	38.5	No
Ybx1	4.99	0.3	0.69	0.01	8.79821e-73	1.25945e-121	0.940533	97	97.7	100	84.6	Yes
Arhgap10	0.2	0.31	0.69	4.31	0.00655479	0.0059489	4.94941e-09	8.8	11.7	27.9	86.5	No
Dhrs3	0.6	0.58	0.68	0.94	5.35764e-32	3.53074e-14	0.0136169	33.8	38.7	55.8	44.2	No
Gucy2f	0.69	-0.73	0.68	3.22	1.01674e-45	4.9009e-10	5.04569e-25	44.2	28.1	48.9	73.1	No
Nt5e	0.34	-0.18	0.67	3.36	0.00428581	1.5256e-07	2.56845e-20	26	18.6	37.5	75	No
Plekhf2	0.41	0.07	0.66	2.07	0.155572	1.73563e-15	1.20329e-14	33.4	30.7	47.2	65.4	No
Samd7	0.07	0.18	0.66	3.96	0.512766		0.0404738	2.6	2.7	21.9	53.8	No
Gm17231	0.18	0.15	0.66	3.39	0.161958		8.32982e-07	11.7	11.4	30.6	65.4	No
Rapgef5	0.11	0.19	0.65	3.94	0.273241		0.000695873	5.9	6.3	25.4	76.9	No
Bbs5	0.27	0.24	0.65	3.38	0.000552547	7.09961e-06	8.0981e-16	17.1	18.9	36.4	76.9	No
Purb	5.62	-0.14	0.65	0.19	2.22053e-18	2.31213e-114	0.226096	98.7	97.6	99.7	84.6	Yes
Atp5b	4.57	0.38	0.64	0.12	1.27693e-102	1.45203e-93	0.467473	96.2	97.1	99.7	80.8	No
Tmem237	0.65	0.15	0.63	1.19	0.000162855	7.81283e-20	4.72431e-05	46.1	44.4	58.8	42.3	No
Anp32e	3.5	-0.07	0.63	0.62	0.000753396	4.07004e-74	0.00026609	95.2	92.6	98.9	76.9	No
Pcbp2	5.29	0.15	0.63	0.28	7.61661e-23	3.46824e-114	0.0653662	98.2	98.1	99.7	84.6	No
Bbs4	0.51	0.19	0.62	1.34	4.72379e-05	1.75401e-14	3.10983e-05	35.6	36.4	52.7	42.3	No
Cacna1f	0.1	0.22	0.62	3.89	0.19605		0.000625874	5.6	6.7	26.3	76.9	No
Hif1a	2.51	0.02	0.62	1.34	0.356555	2.30248e-49	3.39411e-17	89.1	85.1	94.6	90.4	Yes
Chchd10	2.88	0.22	0.62	0.29	1.35178e-22	3.16152e-50	0.176681	88	88.8	95.7	75	No
Vamp2	1.63	-0.02	0.61	0.68	0.567675	4.38936e-44	0.00301918	80	75.2	88.3	61.5	No
Tnfsf12	1.04	0.27	0.61	1.84	9.27683e-18	3.78836e-31	3.66107e-25	60.2	62.3	81.5	69.2	No
Taok3	1.16	0.07	0.6	2.96	0.066067	2.08982e-19	3.87121e-54	58.4	56.3	75.2	94.2	No
Cycs	0.87	0.3	0.6	-0.06	3.64194e-18	6.10812e-25	0.851336	54.7	56.6	74.9	28.8	No
Pla2r1	0.13	0.16	0.6	5.21	0.404332		3.43547e-05	5.4	5.1	22.7	88.5	No
Nim1k	0.62	-0.03	0.6	2.63	0.53119	3.14991e-10	1.47143e-20	38	35.4	52.8	73.1	No
Lgmn	0.75	0.28	0.6	0.61	5.07864e-14	6.8862e-22	0.051315	49.3	51.2	71	36.5	No
Sntb2	0.55	0	0.6	3.51	0.988674	7.85033e-07	7.11631e-25	30.1	27.9	44.3	80.8	No
Dctn1	1.15	-0.01	0.6	0.73	0.657153	9.25982e-30	0.00704957	66.9	64.2	76.8	53.8	No
Ndufb8	2.35	0.18	0.59	0	2.52327e-19	7.04464e-69	0.998011	89	89.7	96.7	59.6	No
Ypel2	0.78	0.2	0.59	2.66	1.56062e-05	2.05526e-12	8.09824e-27	42.1	43.7	62.6	82.7	No
Dmxl2	0.65	0.09	0.58	2.9	0.0546848	9.56735e-12	9.74137e-35	40.6	38.7	56.6	78.8	No
A430035B10Rik	0.09	0.19	0.58	3.31	0.29481		0.00931016	5.2	5.9	24.8	57.7	No
Got2	0.46	0.22	0.58	1.4	4.05953e-06	5.38313e-11	3.92657e-05	32.3	33.7	50.6	32.7	No
Lsm4	1.23	0.23	0.58	0.1	3.20523e-15	7.73882e-30	0.735367	66.5	68.5	84.1	40.4	No
Ppa2	0.95	0.02	0.58	1.28	0.60666	9.34699e-22	1.34251e-07	59.3	56.5	72.6	50	No
Bin1	0.51	0.09	0.57	2.39	0.0691517	5.29219e-12	7.69673e-23	37.2	35.9	49.8	61.5	No
Cnot6	1.89	0.09	0.57	0.72	0.000213174	2.86716e-40	0.000809095	81.4	80.7	91.6	69.2	No
Ccdc107	1.17	0.16	0.57	0.31	8.73398e-08	5.93661e-31	0.273478	67	67.6	83.1	46.2	No
Cerk	0.67	0.06	0.57	0.9	0.184023	3.28042e-13	0.0092165	44.8	42.9	59.5	36.5	No
Cyth2	0.57	0.28	0.56	0.96	6.76259e-12	6.62559e-16	0.00256559	41.1	43.4	58	36.5	No
Gdpd5	0.42	0.2	0.56	2.28	0.000188869	4.07045e-08	5.97304e-13	29.2	29.5	42.6	59.6	No
Pbx3	0.22	0.25	0.56	4.86	0.0382012	0.0425574	3.21518e-10	9.9	10	26.2	84.6	Yes
Nop53	1.15	0.14	0.55	-0.14	6.68573e-06	9.70269e-24	0.668102	64.3	64.3	80.8	38.5	No
Ndufv3	2.04	0.3	0.55	-0.09	5.29503e-38	7.82831e-44	0.730599	81.8	84.9	93.2	55.8	No
Crocc	0.47	-0.03	0.55	2.3	0.595158	6.88316e-11	5.71269e-20	37.9	33.4	48.3	57.7	No
Atp2b1	3.17	0.07	0.55	0.98	0.00341493	9.97289e-39	1.71914e-08	91.7	88.8	97	94.2	No
Tob2	1.3	-0.01	0.55	0.9	0.749231	4.30252e-24	0.000397869	69.7	66.3	81.2	63.5	No
Hprt	0.76	0.31	0.55	0.73	6.25205e-17	1.57946e-17	0.0212021	48.4	51.3	66.9	36.5	No
Agpat5	1.22	-0.02	0.55	1.87	0.648633	9.58349e-21	1.86991e-21	66.5	62.2	77.4	67.3	No
Otx2os1	0.33	0.27	0.55	5.43	6.45572e-05	0.000114935	3.38583e-52	17.4	19.6	33.6	92.3	No
Prkar2a	0.9	-0.01	0.55	1.18	0.741883	5.00161e-15	4.80594e-05	55	50.3	66.7	51.9	No
Eif1a	0.55	0.75	0.54	1.21	1.47319e-61	7.38557e-11	0.000348735	30.2	41.2	56.8	40.4	No
Zdhhc5	0.66	-0.03	0.54	0.3	0.437315	1.22341e-13	0.383488	48.2	43	60.4	25	No
Nap1l1	2.69	0.2	0.54	0.11	4.66113e-21	2.02056e-44	0.618039	89.1	89	95.4	67.3	No
Pkig	0.89	0.33	0.54	1.3	1.9919e-18	8.65692e-16	1.0913e-06	50.4	54.8	70.3	53.8	No
Fam53b	0.21	0.04	0.54	3.34	0.660278	0.00101618	1.727e-12	18.4	14.4	30.3	73.1	No
Fbxo9	1	0.04	0.54	0.48	0.282987	8.93178e-21	0.114179	62.4	59.6	73.8	40.4	No
Tomm20	2.08	0.28	0.53	0.83	8.26359e-36	6.80682e-42	9.6191e-06	82.9	85.9	93.8	73.1	No
Ppef2	0.08	0.19	0.53	3.69	0.379296		0.0142387	4	4.5	23.2	59.6	No
Odc1	0.85	0.75	0.53	0.02	2.59342e-72	3.08087e-12	0.964828	42.5	52.4	69.6	26.9	No
Ano2	0.31	0.48	0.53	4.03	4.62111e-15	9.86787e-05	7.41527e-30	16.2	23.2	35.2	80.8	No
Kif21b	0.27	-0.11	0.53	3.05	0.0988768	4.85693e-05	1.16606e-16	24.9	17.8	34.7	67.3	No
Hsp90aa1	13.2	-0.01	0.53	0.79	0.539779	2.08809e-75	2.93144e-12	99.6	99.7	100	98.1	No
Syne1	0.54	0.87	0.52	3	1.46419e-48	2.52322e-05	1.98423e-16	21.3	31.9	48.6	80.8	No
Arl3	3.92	0.1	0.52	0.99	3.07094e-08	2.37477e-54	3.29602e-12	95.5	95.2	98.9	98.1	No
Commd1	1.36	0.12	0.52	0.63	6.90332e-05	1.73938e-21	0.0203757	68.6	68.6	83.6	53.8	No
Epb41l4aos	0.65	0.34	0.52	-0.08	1.75244e-16	2.62891e-12	0.835549	42	45.3	62	13.5	No
Ccndbp1	0.62	0.25	0.52	1.37	8.91993e-10	2.78492e-13	1.11661e-06	42.9	44.6	60.1	42.3	No
Atp5g1	2.47	0.3	0.52	-0.16	1.29883e-43	9.40048e-43	0.515314	87.7	89.5	95.3	57.7	No
Pde8b	0.89	0.27	0.51	3.47	1.572e-06	5.85135e-06	4.21397e-26	35.3	39.2	53.9	88.5	No
Chrac1	0.85	0.1	0.51	0.55	0.00562494	7.0882e-17	0.0825755	55.4	54.7	69.9	40.4	No
Wdtc1	0.84	0.02	0.51	1.77	0.701178	3.0763e-15	1.58462e-15	55.4	52.1	65.6	63.5	No
Fam3c	2.01	-0.33	0.51	1.19	7.24865e-40	2.26556e-26	8.81376e-10	86.4	76.1	88.5	80.8	No
Meis2	1.05	0.47	0.51	2.46	1.94931e-18	4.46028e-06	2.2656e-12	37.9	42.5	59.9	65.4	Yes
Glmn	1.05	-0.15	0.51	3.22	2.56994e-05	1.83346e-14	1.00561e-80	61.5	54.5	70.5	94.2	No
Optn	0.68	-0.27	0.51	2.78	1.21184e-10	6.90766e-10	1.60687e-35	48.7	39.7	56.6	71.2	No
Ppp2r5c	2.34	0.01	0.51	1.15	0.755748	7.89158e-32	5.37369e-11	85.8	83.3	92.6	86.5	No
Hs3st3b1	0.08	0.2	0.5	3.59	0.395805		0.0257416	3.5	4.2	21.3	61.5	No
Nsf	1.29	0.22	0.5	2.19	3.94373e-10	3.38714e-14	1.54051e-25	59.9	61.3	79.3	84.6	No
Clstn1	5.48	-0.08	0.5	-0.14	6.01223e-06	1.19713e-61	0.425859	98.7	97.6	99.1	78.8	No
Hypk	1.02	0.24	0.5	0.28	3.48776e-15	1.00314e-20	0.359886	60.5	63.7	78.1	44.2	No
Ap2a2	1.17	0.13	0.5	1.34	5.75243e-05	1.17052e-18	1.32813e-09	64.8	64.6	77.6	63.5	No
Vax2os	0.97	0.03	0.49	3.83	0.622842	5.73284e-08	2.52405e-54	47.9	44.2	55.2	65.4	No
3010001F23Rik	0.68	-0.15	0.49	0.87	0.00130437	1.79393e-08	0.0191104	44.9	40	53.3	36.5	No
Snhg12	0.74	0.12	0.49	0.13	0.00330333	3.21224e-12	0.701162	50.3	48.6	62.1	23.1	No
Gars	0.55	0.19	0.49	0.88	3.02681e-05	1.93173e-09	0.0124488	39.5	39.2	53.3	25	No
Eps8	0.07	0.22	0.49	4.07	0.363356		0.0145263	3.1	4.1	20.3	71.2	No
Prelid1	0.79	0.26	0.49	0.2	9.00831e-14	8.67784e-15	0.529901	51.9	53.9	68.1	28.8	No
Hist1h1c	0.68	1.01	0.48	1.5	5.5522e-77	9.8707e-06	0.000142907	30.4	37.7	52.5	50	No
Camsap1	0.88	-0.1	0.48	2.09	0.0114787	2.10939e-12	1.79173e-22	56.5	50.5	65.5	69.2	No
Mdh2	1.57	0.26	0.48	0.5	4.03359e-24	8.51147e-27	0.0413842	75.9	76.5	88.8	61.5	No
Gabarapl1	0.75	0.15	0.48	0.74	6.57328e-05	1.09343e-12	0.0228717	50.6	49.6	64.2	42.3	No
Btc	0.35	0.2	0.48	2.34	0.000455271	3.7985e-05	6.5638e-11	24.7	25.2	38	57.7	No
Epb41	3.67	0.05	0.48	2.85	0.0257992	2.31424e-28	1.50283e-105	91.9	90.2	96.5	100	No
Acsl1	0.31	0.05	0.48	2.9	0.463173	0.000534529	2.6865e-13	22.9	20.4	34.1	53.8	No
Rbpms	0.64	1.05	0.48	-0.85	2.14208e-68	0.000150044	0.0895293	22.4	36.1	50.5	0	No
Mbnl1	1.77	0.33	0.48	1.85	1.66109e-28	2.81797e-17	2.66829e-22	70.9	73.9	86.1	86.5	No
Ndrg1	1.17	1.25	0.47	1.2	2.98521e-200	3.43629e-10	3.52171e-05	40.9	60.4	76.5	69.2	No
Ntm	1.04	0.95	0.47	3.94	8.62785e-50	0.000769761	5.71573e-22	27.9	36.9	58.7	98.1	No
Rabgef1	0.65	0.11	0.47	3.67	0.0209357	1.56198e-08	8.4431e-81	41.7	40.3	54.6	90.4	No
Rpsa	7.51	0.83	0.47	-0.91	0	7.3217e-33	9.05497e-06	97.7	99.1	99.7	75	No
Ss18l2	0.7	0.23	0.47	0.83	9.06503e-10	1.83605e-12	0.00852388	48.1	50.1	62.8	34.6	No
Dixdc1	0.49	0.4	0.47	2.73	1.08373e-14	7.34166e-06	1.14561e-20	28.1	33.1	45.6	63.5	No
Spg7	0.69	0.07	0.46	2	0.109925	3.36331e-10	1.99918e-17	47.5	45.3	59.5	59.6	No
Ubtd1	0.39	0.15	0.46	2.15	0.00868837	3.5574e-05	1.06011e-09	27.5	27.3	42.7	51.9	No
Dnm1	0.33	0.01	0.46	2.62	0.887968	1.09575e-05	2.99529e-18	28.7	24.1	38.3	57.7	No
Gpi1	2.17	0.39	0.46	0.35	5.89389e-60	6.28611e-27	0.129972	81.6	85.6	91.2	59.6	No
Eif4g2	5.26	0.05	0.46	-0.38	0.00478681	3.01905e-56	0.0465243	98.3	97.8	99.2	78.8	No
Raly	1.44	0.22	0.46	0.55	3.05398e-16	4.45543e-22	0.031706	73.5	73.8	86.6	59.6	No
Cox5a	2.07	0.11	0.46	0.2	3.27249e-06	3.69032e-31	0.383811	85.9	85.1	94.5	55.8	No
Fbxl5	1.47	-0.03	0.46	1.89	0.273531	9.56832e-19	1.6955e-28	76.2	70.3	83.9	82.7	No
Prkcz	0.15	0.12	0.46	3.26	0.258401		3.07271e-06	12.5	11	25.9	55.8	No
Pak7	0.31	0.03	0.46	4.87	0.773181	0.0321876	6.20144e-18	15.9	13.5	28.7	80.8	No
Dync1li1	0.73	0.11	0.45	1.44	0.00685449	1.97681e-09	4.29416e-07	47.2	46.5	63.6	51.9	No
Rpp21	0.55	0.16	0.45	0.63	0.000160628	7.66902e-09	0.0674731	40.8	40.2	52.7	23.1	No
Rab28	1.35	0.01	0.45	2	0.849873	3.86555e-14	1.94413e-25	69	65.3	80.1	82.7	No
Sys1	1.27	0.25	0.45	0.74	9.50929e-19	5.51253e-20	0.00361702	69.6	71.2	83.3	55.8	No
Pde4dip	0.73	-0.12	0.45	1.57	0.00199171	9.94554e-10	3.43637e-09	53.3	46	56.9	50	No
Zfp444	0.61	0.07	0.44	1.55	0.114101	7.28516e-09	2.88947e-08	44	42.3	53.3	44.2	Yes
Atp6v0e2	1.21	0.1	0.44	-0.11	0.0012627	1.96273e-17	0.743299	69.3	67	80.1	30.8	No
Hnrnpab	1	0.16	0.44	0.52	1.79662e-06	2.85163e-13	0.0974737	60.9	59.4	72.6	40.4	No
Slc25a25	0.42	0.34	0.44	2.92	8.58327e-11	4.30354e-05	1.54724e-23	27.3	30	42	75	No
Hist1h2bc	4.71	0.15	0.44	-0.18	4.67112e-11	3.49509e-24	0.406927	95.2	92.5	98.3	73.1	No
Nr2f2	1.46	0.86	0.44	-1.6	2.93581e-46	0.000984194	0.00322692	33.8	43.3	56.5	9.6	Yes
Arl13b	0.73	0.07	0.44	2.4	0.163975	1.63879e-07	1.59336e-22	45.4	43.2	57.3	73.1	No
Sdhaf1	0.49	0.27	0.44	0.85	2.82913e-10	3.71025e-08	0.0124524	36.4	39.1	52.4	26.9	No
Xiap	2.68	-0.08	0.44	1.46	0.000790953	8.95448e-25	1.00706e-20	90.3	86.4	93.4	84.6	No
Ndufb1-ps	2.99	0.29	0.44	-0.05	8.84679e-49	1.9444e-34	0.814556	90.7	93	97.9	51.9	No
Rnf157	0.52	-0.17	0.44	2.76	0.00190707	0.00010428	1.57015e-18	35.8	29.3	44.2	67.3	No
Pabpc1	2.27	0.48	0.43	-0.51	8.84382e-87	3.78655e-22	0.0848953	80.9	86.3	94	38.5	No
Ndufa5	2.36	0.25	0.43	-0.36	1.50263e-34	2.03394e-32	0.181354	88.1	89.9	96.5	53.8	No
Lifr	0.8	-0.11	0.43	1.17	0.0101416	2.9193e-08	0.000240229	52.1	46.3	60.7	42.3	No
Phlpp2	0.57	-0.06	0.43	2.91	0.289149	9.64871e-06	9.95101e-29	38.4	35.1	46.8	76.9	No
BC005537	1.5	0.1	0.43	0.06	0.000381195	4.28647e-17	0.853582	74.9	72	83.6	48.1	No
Rps6ka2	0.88	0.23	0.43	1.5	1.17172e-07	5.57767e-07	1.20301e-06	46	47.6	62.5	50	No
Zfyve28	0.2	0.29	0.43	5.02	0.0105149	0.11885	5.60366e-12	9	11.6	24.6	86.5	No
Cul3	2.37	-0.03	0.43	2	0.210016	1.79503e-22	8.20516e-45	88.1	83.6	93.4	94.2	No
Cox6c	8.36	0.2	0.43	-0.31	1.40718e-49	3.19905e-64	0.0430978	99	99.4	100	88.5	No
Cfap97	0.76	0.01	0.43	0.25	0.728493	5.53009e-09	0.471886	51.4	48	60.7	28.8	No
Lpgat1	1.59	-0.13	0.43	0.67	1.7937e-05	5.71401e-13	0.0173449	74.4	68.7	79	55.8	No
Ap1b1	0.75	0.08	0.42	1.81	0.0424892	1.13629e-09	6.89947e-15	50.7	49.7	65.6	59.6	No
Hook1	1.49	0.13	0.42	0.96	3.13479e-05	7.87145e-14	9.47693e-05	71.2	69.8	81.9	55.8	No
Uqcrh	5.52	0.28	0.42	-0.48	8.69258e-75	7.40361e-51	0.0131108	97.9	98.6	99.8	69.2	No
St8sia1	0.7	-0.57	0.42	2.9	3.25568e-34	7.04389e-05	1.2545e-23	48.1	31.8	47	67.3	No
Hmgn2	2.52	0.2	0.42	0.2	3.60025e-18	1.11302e-22	0.382653	87.7	88	93.4	57.7	No
Aldh1a1	5.07	0.6	0.42	-3.14	6.16529e-42	2.34215e-05	3.21694e-13	58.6	71.9	78.9	13.5	No
Necab2	2.11	0.98	0.42	-2.32	4.17822e-84	0.00016522	5.55553e-07	46.3	57.4	67.8	5.8	No
Rpl10a	7.39	0.51	0.41	-0.61	1.08385e-224	2.82704e-42	0.0007261	98.5	99.1	99.8	75	No
D1Ertd622e	0.56	0.08	0.41	2.32	0.097402	8.64102e-06	1.78845e-17	38.7	36.4	50.9	55.8	No
Fam78b	0.4	0.22	0.41	3.41	0.00101805	0.00354999	1.5594e-19	22.8	24.4	36.6	67.3	No
Cep164	0.99	-0.01	0.41	2.57	0.836538	5.7215e-10	4.52269e-46	60.4	55.2	68.5	80.8	No
Atp5mpl	3.23	0.46	0.4	-0.43	2.91466e-130	4.94081e-32	0.073396	90.7	94.4	98.9	51.9	No
Rack1	5.8	0.55	0.4	-0.89	2.9648e-210	4.30337e-33	2.91964e-05	97.3	98.3	99.5	53.8	No
Dctn3	1.42	0.16	0.4	-0.79	2.67929e-10	2.72112e-18	0.0158752	75.6	75.7	86.8	21.2	No
Hspa14	0.6	0.06	0.4	1.09	0.164188	2.23138e-07	0.000748033	44.7	42.7	51.9	38.5	No
Uba52	5.47	0.4	0.4	-0.78	4.39517e-129	3.24093e-37	0.000224508	96.6	98.1	99.7	53.8	No
1190005I06Rik	1.3	0	0.4	1.09	0.991978	1.68994e-11	1.16519e-05	69.3	66.1	76.2	57.7	No
Pnrc1	2.31	0.37	0.4	0.4	2.03015e-52	2.57903e-18	0.0839665	83.7	85.2	91	67.3	No
Anp32a	4.61	0.03	0.4	0.75	0.0604499	4.7988e-40	7.7869e-08	97.4	97	98.9	82.7	No
Oaz1	10.39	0.19	0.4	-0.15	4.52557e-56	2.04476e-68	0.252434	99.4	99.7	100	96.2	No
Scand1	1.93	0.22	0.39	0.32	8.37721e-21	7.87536e-21	0.191316	82.8	83.2	90.1	50	No
Atp5o	2.32	0.19	0.39	-0.15	3.39767e-18	5.53947e-24	0.556316	87.2	88.1	94	50	No
Nadk2	1	-0.17	0.39	1.68	4.21141e-07	5.26237e-09	3.76159e-13	62.8	55.2	68.5	61.5	No
Tmsb4x	6.37	0.58	0.39	-0.8	7.57898e-153	1.44235e-18	0.000554565	95.4	96.7	99.5	67.3	No
Ndufv1	0.99	0.34	0.39	0.19	3.77745e-27	8.05455e-12	0.555861	58.3	63.2	73.7	40.4	No
Rhot1	1.15	-0.03	0.39	2.41	0.473668	1.76994e-09	4.60905e-39	64.5	60.1	74.3	88.5	No
Glo1	2.97	0.05	0.38	0.15	0.0267165	4.26218e-27	0.459545	93.5	91.8	95.7	67.3	No
Gm44196	0.23	0.12	0.38	6.36	0.423605	0.28356	1.42713e-12	9.2	7.3	20.3	88.5	No
Uqcrq	4.16	0.32	0.38	-0.47	2.68933e-77	3.89075e-34	0.031706	96	96.3	98.9	55.8	No
Xylt1	0.19	0.41	0.38	4.25	0.000465166	0.207356	1.03753e-07	7.7	11.7	24.3	76.9	No
Ddx19a	0.55	0.2	0.38	0.47	2.99898e-06	3.92998e-06	0.183585	39.2	41.1	50.9	21.2	No
Eml1	0.34	0.44	0.38	2.59	8.2169e-13	0.00673189	1.15116e-10	19.2	25.1	36	55.8	No
Tsg101	1.14	-0.01	0.38	0.91	0.834669	1.44515e-10	0.000978758	66.9	62.9	74.9	57.7	No
1110008P14Rik	1.02	0.59	0.38	-0.36	1.17327e-57	9.41846e-08	0.318899	53.1	59.6	74.4	26.9	No
Socs3	2.35	2.27	0.38	-2.45	0	0.00343332	1.46226e-06	30.1	56.2	64	3.8	No
Abcf1	1.3	0.07	0.38	-0.15	0.028155	8.48836e-12	0.647412	70.4	67.7	79	26.9	No
Tbcc	0.47	0.32	0.38	1.81	3.4929e-14	4.87816e-06	3.93637e-11	34.3	37.9	52.2	53.8	No
Rnf10	1.8	0.02	0.38	0.01	0.427271	8.35635e-16	0.976856	81.2	78.6	89.1	42.3	No
Tmsb15b2	0.52	0.38	0.38	0.68	7.79991e-20	2.89546e-06	0.0488806	36.4	40.8	55	23.1	No
Camk1d	4.66	0.01	0.37	1.95	0.795382	2.65817e-18	3.91506e-43	97.6	95	98.6	96.2	No
Tax1bp1	4.95	-0.05	0.37	0.86	0.00185358	2.63299e-32	4.6203e-10	98.2	96.7	99.2	94.2	Yes
Klhl29	0.52	0.85	0.37	3.64	2.04219e-39	0.0117628	3.80004e-20	19.5	29	42.3	67.3	No
Atf4	1.22	0.3	0.37	1.23	3.52009e-19	7.97083e-09	1.15027e-06	62.8	63.6	74	67.3	Yes
Stard10	1.29	0.1	0.37	-0.67	0.000326135	6.58833e-13	0.0432622	72.1	69.6	79.7	17.3	No
Ppp3cc	0.9	-0.01	0.37	3.34	0.867776	3.5317e-05	5.1052e-46	48.2	45	58	86.5	No
Erc2	0.4	0.31	0.37	4.59	4.7841e-05	0.0409593	2.43282e-23	18	20.4	30	90.4	No
Vbp1	1.04	0.14	0.37	0.42	4.54294e-06	4.77938e-11	0.169996	64.3	64.1	74.9	38.5	No
Eef2	5	0.21	0.37	-0.88	6.69039e-35	1.05482e-30	0.000138213	97.7	97.8	99.2	55.8	No
Ppargc1a	0.8	-0.05	0.37	1.51	0.290292	0.000150386	8.94954e-06	45.6	41.9	54.7	40.4	No
Iigp1	3.8	-2.83	0.37	-1.1	0	0.0231711	0.0601074	63.1	32.7	40.1	1.9	No
Dnajc5	1.66	-0.07	0.37	0.91	0.0106773	1.29625e-12	9.77375e-05	79.4	73.3	82.3	59.6	No
Gapdh	25.08	0	0.36	-0.06	0.948252	5.10907e-61	0.563252	99.7	99.9	100	98.1	No
Zfas1	1.06	0.08	0.36	-0.61	0.0194108	1.8441e-08	0.0853164	62	60	73	17.3	No
Gm26954	0.24	0.13	0.36	6.4	0.322843	0.23527	4.29821e-17	10.4	9	21	96.2	No
Sp4	1.18	-0.16	0.36	1.87	1.42507e-05	1.74656e-06	3.40899e-14	62.1	55.7	66.2	55.8	Yes
Ap2m1	1.76	0.21	0.36	-0.44	3.60154e-18	2.57824e-16	0.152847	79.5	81.1	89.1	38.5	No
Ssbp4	1.05	0.24	0.36	0.86	3.03376e-15	6.83723e-11	0.001435	62.8	64.9	76.2	51.9	No
Ndufb9	3.46	0.13	0.36	-0.41	1.19384e-13	1.21982e-30	0.0779548	95.5	95.2	98.4	50	No
Ndufa10	1.33	0.24	0.36	0.93	7.42714e-17	1.40962e-11	0.000140055	69.2	71	78.7	61.5	No
Ttll11	0.29	-0.08	0.36	4.05	0.361483	0.0464963	1.39928e-18	20.5	15.9	26.7	59.6	No
Abcg1	0.58	0.27	0.36	0.94	1.75191e-09	7.41114e-05	0.00958984	38.9	39.6	55	32.7	No
Atp5g3	2.49	0.16	0.36	-0.32	5.47436e-14	1.90502e-20	0.227762	89.5	88.5	94.6	42.3	No
Rps15	14.17	0.34	0.36	-1.04	7.69762e-150	3.0194e-43	1.78263e-12	99.4	99.7	100	82.7	No
Ier3	1.8	1.07	0.35	-0.26	1.25979e-124	0.000247688	0.52684	51.5	62.1	72.7	48.1	No
Cox5b	3.76	0.27	0.35	-0.23	3.1258e-53	8.10128e-28	0.26997	94.9	96	98.3	63.5	No
Ndufa1	2.43	0.34	0.35	-0.79	2.88699e-63	2.1999e-21	0.00831939	87	89.5	95.6	34.6	No
Ddb1	1.41	0.1	0.35	0.58	0.000586413	3.09602e-12	0.0300076	74.8	72	80.8	57.7	No
Rps8	18.74	0.37	0.35	-1.04	1.5685e-161	9.71797e-39	6.24677e-14	99.6	99.7	100	84.6	No
Vps37a	1.17	-0.16	0.35	1.72	7.0452e-07	1.18283e-08	3.35957e-16	69.3	60.7	71.6	73.1	No
Coq7	0.8	0.08	0.35	0.2	0.0257097	1.055e-07	0.53505	55.8	53.2	66.7	26.9	No
Bag6	0.76	0.15	0.35	0.32	7.19794e-05	2.24106e-07	0.328735	52.4	51.7	63.4	26.9	No
Frmpd2	0.08	0.17	0.35	4.61	0.526792		0.0123967	3.6	3.1	15.1	75	No
Gls	1.49	0.22	0.35	1.87	6.64932e-12	1.33814e-08	1.91077e-20	68.2	68.4	80.1	75	No
Tusc3	1.42	0.32	0.35	0.9	2.49469e-24	9.1048e-09	0.000722595	65.5	68.4	78.7	59.6	No
Mrpl34	1.04	0.22	0.35	-0.02	3.29877e-13	2.65397e-10	0.958052	63.2	65.1	75.7	28.8	No
Iqsec1	0.62	0.1	0.35	3.23	0.0274643	1.74821e-05	5.84532e-68	43.8	41.7	53.8	80.8	No
Pde6d	1.17	0.02	0.35	1.21	0.638505	4.5599e-09	6.59257e-07	67.4	64.7	75.2	55.8	No
Ctif	0.47	0.06	0.35	2.73	0.292057	0.00350764	6.41928e-17	29.8	29.9	41.3	61.5	No
Stard7	0.78	-0.03	0.35	3.09	0.545113	7.89856e-06	3.19616e-61	51.5	47.1	57.4	94.2	No
Atp5c1	3.51	0.13	0.35	-0.27	1.36427e-12	1.33626e-25	0.232012	94.2	95.2	98.4	63.5	No
Cetn2	0.94	0.43	0.35	-0.19	3.61106e-36	4.39563e-08	0.568298	54.9	59.4	71.5	25	No
Uqcrb	3.48	0.19	0.35	-0.39	2.87493e-26	1.19052e-26	0.0956344	94.6	95.2	97.8	46.2	No
Scg5	2.24	0.4	0.35	0.61	3.24221e-56	1.68984e-12	0.00949798	81.2	84.6	93.5	67.3	No
Hsp90b1	4.91	0	0.34	-0.54	0.955316	3.00905e-21	0.0191511	98	96.9	99.1	63.5	No
Ddx1	1.31	0.1	0.34	0.64	0.00063518	2.73752e-10	0.0202115	71.3	69.7	80.9	48.1	No
Cfap61	0.09	0.25	0.34	4.2	0.274496		0.00740032	3.3	5.2	16.6	65.4	No
Rbm7	0.81	0.14	0.34	0.65	5.31696e-05	2.44937e-07	0.0416203	54.9	54.6	66.1	32.7	No
Uhmk1	0.69	-0.19	0.34	1.55	7.12379e-07	9.64871e-06	1.49853e-08	53.1	44.2	54.7	44.2	No
2410006H16Rik	1.37	0.59	0.34	-0.95	6.10941e-75	4.27997e-08	0.0087251	61.6	70.4	79.7	19.2	No
Gsk3a	0.64	0.11	0.34	0.42	0.00518725	5.17978e-06	0.214142	47.2	46.5	58.2	23.1	No
Grina	2.29	0.05	0.34	0.58	0.0391619	8.65177e-16	0.00911892	88.5	85.7	93.2	61.5	No
Eif3f	2.52	0.39	0.34	-0.42	2.54374e-77	4.46624e-18	0.12143	86.6	90.7	95.3	48.1	No
Ppp3r1	0.76	0.06	0.34	1.15	0.120824	1.56921e-06	7.94172e-05	53.4	50.4	61.8	42.3	No
Atp5l	5.37	0.26	0.34	-0.47	5.39998e-67	2.08102e-32	0.0167979	97.8	98.2	99.7	63.5	No
Cdkn2c	0.49	0.86	0.34	0.84	2.0003e-79	0.000347749	0.0238484	25.7	39.9	50.5	30.8	No
Cox7a2l	3.24	0.22	0.34	-0.74	3.87687e-30	9.18682e-20	0.00723174	92.2	93.3	97.9	44.2	No
Tmem9	0.8	0.19	0.34	0.39	3.52191e-08	4.40449e-07	0.233897	53.5	54	66.4	28.8	No
Rps28	11.52	0.85	0.34	-1.29	0	1.35203e-27	7.37269e-14	98.6	99.5	99.8	78.8	No
Eif4b	1.14	0.15	0.33	-0.31	1.60104e-06	9.82666e-09	0.343425	65.6	65.1	75.7	23.1	No
Ift74	0.97	0.18	0.33	1.42	1.311e-06	6.82249e-06	1.33038e-07	54.3	54.5	68.9	50	No
Rps11	9.4	0.4	0.33	-1.01	2.12103e-171	6.37473e-33	6.20166e-09	99.1	99.4	99.8	71.2	No
Fam216a	0.6	0.4	0.33	0.57	2.8017e-23	2.66927e-05	0.0984193	39.8	45.5	54.4	25	No
Psmc2	0.89	0.23	0.33	0.14	8.24863e-12	8.44262e-08	0.674127	57.3	59.2	70.3	26.9	No
Snrnp27	1.27	0.22	0.33	0.48	2.99916e-14	2.1568e-09	0.100013	68.1	69.5	78.7	40.4	No
Polr2j	1.24	0.28	0.33	-0.78	3.22567e-23	8.12754e-11	0.0193389	69.3	72.2	82.8	19.2	No
Mdh1	2.81	0.15	0.33	0.29	9.11966e-14	2.59842e-19	0.173244	91	91.6	95.6	65.4	No
Mrpl20	1.19	0.18	0.33	0.03	4.5401e-11	1.28154e-10	0.926323	70.8	70.5	81.4	36.5	No
Gtf2a1	1.16	-0.13	0.33	0.53	0.000174634	2.767e-06	0.11039	65.1	58.2	66.4	38.5	No
AW549877	0.72	-0.23	0.33	1.08	3.47531e-10	1.73402e-05	0.000658968	55.4	45.4	55	44.2	No
Slc44a1	0.83	0.3	0.33	2.93	8.03774e-13	9.41067e-05	3.66853e-40	45.7	48.8	59.5	86.5	No
Prmt1	0.95	0.27	0.33	0.08	2.18952e-16	1.21587e-07	0.80366	58.6	60.6	73.3	28.8	No
Mkrn1	0.88	0.24	0.33	0.41	7.86977e-13	4.75269e-07	0.206266	55.6	57.5	69.6	36.5	No
Trib2	0.88	-0.42	0.33	1.09	5.20234e-31	4.86566e-05	0.000900388	61.6	46.1	57.1	40.4	No
Ndufb11	4.1	0.11	0.33	-0.71	2.54671e-11	3.2048e-26	0.00365654	96.7	96.7	98.9	53.8	No
Ppp1cc	1.52	0.22	0.33	0.72	2.22843e-16	1.79446e-10	0.00421186	74.2	75.3	87.2	65.4	No
Ip6k2	0.63	0.09	0.33	1.62	0.0534513	0.000103259	1.67392e-08	44.8	42.2	54.1	48.1	No
Stk25	0.63	0.09	0.32	0.2	0.0369613	2.60329e-05	0.556398	47.5	45	55.4	17.3	No
Unc80	0.29	0.05	0.32	4.05	0.499165	0.0596492	2.50526e-21	19.4	18.2	28.2	73.1	No
Rpl4	5.03	0.48	0.32	-1	6.85404e-150	9.37717e-20	2.66667e-05	96.1	97.4	98.4	57.7	No
Ypel3	2.23	0.4	0.32	-0.3	1.73965e-65	4.33773e-13	0.285217	83.6	87.2	92.9	46.2	No
Mthfsl	0.7	0.26	0.32	0.79	1.4577e-11	1.89528e-05	0.0174128	46.1	48.8	59.5	30.8	No
Lamtor5	1.64	0.13	0.32	0.09	9.02316e-08	3.11048e-13	0.750812	81.1	81.1	87.9	46.2	No
Heg1	0.74	0.15	0.32	2.59	0.00279262	0.0029772	3.75989e-18	39.6	39.9	49.2	73.1	No
Phb2	0.77	0.39	0.32	-0.14	1.37227e-28	2.13125e-06	0.67087	49.7	55.2	66.9	15.4	No
Fam126b	1.19	-0.14	0.32	0.4	5.40093e-05	4.21867e-06	0.22769	65.9	59.1	68.3	38.5	No
Cct4	1.23	0.25	0.32	0.43	4.99575e-18	1.11006e-08	0.143233	67.5	68.1	81.2	50	No
Dut	0.66	0.21	0.32	0.72	2.11045e-07	4.49886e-05	0.0338503	46.5	46.8	58.4	26.9	No
Snrpa1	0.69	0.14	0.32	0.33	0.000387832	3.34692e-05	0.325239	48.5	47.4	56.3	19.2	No
Zcchc17	1.09	0.08	0.32	0.31	0.0112151	2.87911e-07	0.325671	64.9	62.3	72.7	40.4	No
Tmem230	0.66	0.19	0.32	0.61	8.13973e-07	3.88266e-05	0.0733133	46.5	46.6	57.7	30.8	No
Ccpg1	1.24	0.03	0.31	-0.11	0.354018	1.16609e-07	0.737063	69.4	65.8	75.7	30.8	No
Hspa4l	2.94	-0.08	0.31	1.13	0.000327859	1.65566e-12	9.71406e-11	91.6	88	93.1	84.6	No
Ppp1r42	0.1	0.16	0.31	3.63	0.390682		0.00406796	6	6.1	18.8	61.5	No
Trappc6b	1.28	0.07	0.31	0.47	0.0236617	8.09924e-09	0.104952	71.3	69.7	79.8	51.9	No
Cpt1a	0.82	-0.2	0.31	1.72	7.58383e-08	6.8794e-05	2.96299e-11	57.3	47.9	57.4	51.9	No
Rpl9	16.87	0.38	0.31	-1.05	2.07533e-188	4.32914e-32	1.57959e-13	99.5	99.7	99.8	82.7	No
Suds3	0.98	-0.03	0.31	-0.12	0.46624	7.4816e-07	0.719415	63.5	60.2	71.6	25	No
2510009E07Rik	0.92	-0.21	0.31	0.3	4.62214e-09	3.71148e-05	0.373576	59.8	52	62.3	26.9	No
Maf1	0.66	0.23	0.31	0.05	1.5679e-09	3.14131e-05	0.87862	46.6	48.4	59.3	13.5	Yes
Ctsd	2.64	0.8	0.31	-1.85	6.49357e-217	2.58196e-10	1.52983e-08	83	89.6	92.4	19.2	No
Pfdn2	1.52	0.15	0.31	0	6.30792e-09	3.30492e-11	0.998618	79	78.5	84.7	44.2	No
Ciao2b	0.52	0.34	0.31	0.33	6.93234e-17	0.000151191	0.321272	38.4	42.3	53.8	15.4	No
Psmc3	1.64	0.2	0.31	-0.32	4.17517e-15	4.05402e-10	0.311223	77.1	78.1	84.7	34.6	No
R3hdm4	0.79	0.42	0.31	0.15	3.81337e-33	4.26622e-06	0.65645	50.1	55.7	66.7	26.9	No
Lca5	0.46	0.08	0.3	2.87	0.136238	0.00838553	3.06379e-22	31.6	30	40.5	63.5	No
Hagh	0.83	0.03	0.3	0.64	0.368525	5.91353e-06	0.0429734	58.3	54.8	64.7	38.5	No
Tle5	3.72	0.03	0.3	-0.61	0.140389	2.28644e-20	0.014499	96.1	94.7	97.6	55.8	No
Rps24	20.14	0.4	0.3	-0.9	1.9692e-212	2.23874e-31	5.80385e-12	99.5	99.8	100	88.5	No
Gpx4	15.24	0.35	0.3	-0.67	8.44538e-191	3.50676e-38	3.64123e-07	99.7	99.8	100	86.5	No
Fundc2	1.38	0.29	0.3	-0.89	2.89926e-27	4.51375e-09	0.00818248	71.3	72.9	84.5	19.2	No
Tmem108	0.46	-0.13	0.3	5.97	0.139931	0.14073	3.84167e-35	19.9	16.6	26	96.2	No
Rps17	8.87	0.34	0.3	-0.77	4.75422e-128	2.45228e-27	8.5342e-06	98.6	99.4	100	71.2	No
Syngr1	0.79	0.23	0.3	0.68	1.4351e-09	5.5841e-05	0.0410826	51.6	52	61.7	34.6	No
Pigt	0.86	0.14	0.3	-0.27	4.84583e-05	4.41679e-06	0.419181	57.7	56.5	63.6	15.4	No
Hnrnpa1	2.3	0.35	0.3	-0.5	9.79565e-47	6.38776e-10	0.102446	84	85.7	90.7	44.2	No
Tbc1d8	0.22	0.13	0.3	3.77	0.157	0.15317	9.23888e-13	15.4	15.1	26.3	65.4	No
0610009B22Rik	0.85	0.02	0.3	1.15	0.640428	5.91129e-06	2.81456e-05	59.5	56.6	66.4	50	No
Rps7	12.84	0.34	0.3	-1.16	3.85876e-145	1.35712e-28	4.34414e-13	99.2	99.5	100	73.1	No
Rps25	10.03	0.38	0.29	-1.25	3.86796e-168	6.78177e-27	3.91185e-12	98.9	99.5	99.8	69.2	No
Sugp2	0.64	-0.06	0.29	0.96	0.200618	0.000510556	0.00525873	47.7	42.7	51.6	28.8	No
Pclo	1.28	-0.25	0.29	3.64	2.28421e-08	0.00384731	1.40119e-42	55.2	48.4	62.3	92.3	No
Pdia5	0.18	0.11	0.29	3.05	0.243359	0.187456	3.08815e-07	14.9	13.5	26.7	57.7	No
Mrpl14	1.16	0.22	0.29	-0.33	9.19435e-14	1.44195e-07	0.315513	66.8	68.7	78.5	25	No
Ppp1r35	0.6	0.24	0.29	0.28	1.04874e-09	0.00015373	0.38866	44.1	46.7	54.4	19.2	No
Selenoh	0.64	0.3	0.29	0.13	1.70362e-14	0.000143686	0.697554	45.5	47.4	56.8	15.4	No
Actl6a	0.61	0.12	0.29	0.61	0.00782261	0.000649837	0.0804426	44	42.5	54.4	21.2	No
Timm10b	0.95	0.2	0.29	-0.41	1.37149e-09	5.07492e-06	0.230572	59.3	59.9	69.9	17.3	No
Eif3h	2.76	0.3	0.29	-1.14	2.02748e-50	1.46327e-13	0.000229046	89.4	91.3	94.5	34.6	No
Top2b	3.4	-0.05	0.29	0.68	0.016256	3.12589e-13	0.000298908	94.7	91.9	96.4	76.9	No
Rps6	7.12	0.41	0.29	-0.79	1.30911e-130	1.20744e-17	8.0211e-05	97.7	98.5	99.8	65.4	No
Suz12	1.83	-0.1	0.29	0.34	0.000299619	9.43987e-08	0.230476	81.7	76.1	85.2	44.2	No
H3f3a	17.59	0.23	0.29	-0.38	1.40749e-102	9.85184e-42	0.00165185	99.8	99.9	100	98.1	No
Csde1	2.52	0.05	0.29	-0.12	0.0182123	4.1635e-12	0.648537	89.6	88.1	92.9	55.8	Yes
Dync1h1	2.41	-0.24	0.29	0.12	1.19566e-27	1.13629e-09	0.634998	89.3	82.9	88.5	57.7	No
Fgf2	1.2	0.02	0.29	0.97	0.581649	0.00026635	0.0022358	64.1	57.7	71.1	38.5	No
Sap30l	1.15	0.12	0.28	0.6	5.0545e-05	6.73093e-07	0.0383128	67.9	66.9	74.9	42.3	No
Rps2	9.41	0.55	0.28	-0.36	4.42665e-275	8.65575e-20	0.02843	98.9	99.3	100	88.5	No
Sh3bgrl2	0.95	-0.09	0.28	0.99	0.0226084	0.000807201	0.00369064	56.6	50.2	60.3	40.4	No
Ric8b	0.89	-0.05	0.28	2.31	0.270515	0.000453698	2.2576e-24	55.4	50.2	61.4	63.5	No
Dmwd	0.53	0.04	0.28	0.38	0.362876	0.00110204	0.274269	42.3	39.1	50.9	11.5	No
Arl4a	0.75	0.4	0.28	0.73	3.32576e-23	0.00074684	0.0387539	44	49.3	60.7	28.8	No
Rpl8	12.08	0.36	0.28	-0.93	5.46931e-149	7.82107e-25	4.79111e-09	99.2	99.6	100	73.1	No
Eif3e	1.63	0.42	0.28	-0.21	2.66323e-59	1.16259e-08	0.479322	73.9	79	85.6	40.4	No
Ndufa2	4.22	0.23	0.28	-0.51	4.90192e-45	6.03404e-19	0.0233011	96.4	97.4	99.1	59.6	No
Gm4951	1.25	-1.79	0.28	-0.21	4.70811e-278	0.0377773	0.653407	61.2	31.7	35.3	1.9	No
Smc4	0.62	0.52	0.28	0.72	1.42848e-29	0.00524424	0.0645263	34	41.8	51.6	25	No
Rad23a	0.95	0.04	0.28	0.06	0.240568	4.23906e-05	0.852423	60.4	57.5	67.4	21.2	No
Hnrnpul1	1.36	0.01	0.28	0.05	0.673115	7.06172e-07	0.877194	73.3	70.1	79.5	38.5	No
Abhd8	1.14	0.01	0.28	-0.47	0.872775	2.30689e-06	0.156729	69.5	65.4	73.5	15.4	No
Rps20	14.19	0.42	0.28	-1.31	8.33392e-202	7.4789e-23	5.38532e-16	99.2	99.6	99.8	75	No
Polr2c	0.86	0.21	0.28	0.41	4.44207e-10	1.6611e-05	0.200302	58.2	58.6	68.6	34.6	No
Eid2	0.56	0.19	0.28	0.74	2.50588e-06	0.00066538	0.028204	42.9	43.3	54.4	26.9	No
Tmem63b	1.06	-0.05	0.28	0.46	0.133443	1.30933e-05	0.144507	66.7	60.8	68.8	38.5	No
Med30	0.62	0.17	0.28	0.22	1.17584e-05	0.000321861	0.513558	46.5	47	58.8	17.3	No
Usp12	0.83	-0.2	0.28	1.04	2.64605e-08	0.000356017	0.00111109	59.1	49.3	58.7	42.3	No
Slc4a7	1.91	0.31	0.28	2.16	3.56789e-21	6.39564e-05	8.09606e-25	74.4	71.1	85	90.4	No
Trafd1	0.98	-0.43	0.28	2.08	5.30975e-36	0.000504174	4.42225e-19	63.7	53.1	59.8	76.9	No
Dpy30	1.08	0.2	0.28	0.83	1.77275e-11	2.53804e-06	0.00312009	64.5	65.1	78.1	46.2	No
Dek	2.84	0.03	0.28	0.13	0.230691	2.26957e-11	0.589201	91.5	90.5	94.8	61.5	No
Mtx2	0.76	0.16	0.28	0.48	4.62993e-05	0.00043126	0.160051	50.1	50.6	59.6	26.9	No
Gid4	0.78	0.03	0.27	-0.31	0.531089	0.000831154	0.375798	51.6	49.1	57.4	9.6	No
Wdr78	0.42	0.24	0.27	3.86	7.59765e-05	0.0527725	1.73361e-31	25.2	25.6	35.2	80.8	No
Mest	0.91	-0.19	0.27	0.79	3.57342e-05	0.00820393	0.0467519	53.3	44.7	55.8	28.8	No
Rpl41	17.2	0.77	0.27	-1.39	0	1.12682e-23	1.35034e-20	99.6	99.8	99.8	73.1	No
Sart1	0.6	-0.05	0.27	0.69	0.257839	0.00161055	0.0447984	46.2	41.7	50.6	21.2	No
Set	3.41	0.1	0.27	-0.38	7.72449e-07	1.33213e-12	0.129895	94.1	93.4	95.3	59.6	No
Slc25a33	1.33	-0.19	0.27	1.21	9.88196e-11	1.48853e-05	7.47573e-07	73.3	65.2	74.3	69.2	No
C1d	0.81	0.27	0.27	-0.05	4.42042e-15	5.37066e-05	0.87611	53.9	56.7	65	21.2	No
Ubxn6	0.9	0.13	0.27	0.28	0.000151219	3.87971e-05	0.386056	59.3	58.3	67.7	34.6	No
1810058I24Rik	0.92	0.33	0.27	-0.34	3.74949e-24	2.66907e-05	0.312799	57.2	60	70.2	19.2	No
Txnl4a	0.66	0.16	0.27	-0.01	6.98456e-05	0.000812178	0.983852	47.4	46.2	56.3	11.5	No
Gas6	1.22	1.02	0.27	0.17	2.65669e-141	0.00130774	0.63096	46.6	61.4	75.2	48.1	No
Scn7a	2.15	0.34	0.27	-1.95	2.72581e-17	0.00315768	1.63061e-06	62.3	64.4	73.5	7.7	No
Zfp644	2.61	-0.07	0.27	0.78	0.00397861	6.66781e-09	0.000198784	89.9	86.8	92.4	69.2	Yes
Tmem150c	0.85	-0.38	0.27	2.1	9.35871e-20	0.00725798	4.46381e-13	54.1	41.6	52.4	57.7	No
Bzw2	1.3	0.13	0.27	1.35	0.000177297	0.000190599	1.37366e-07	63.4	63	75.4	57.7	No
Abhd17a	0.88	0.3	0.27	0.08	1.85286e-20	3.02201e-05	0.813543	56.8	60.1	69.1	26.9	No
Pgp	0.86	-0.13	0.27	0.32	0.000188185	0.000230697	0.331343	60.5	53.2	62.1	28.8	No
Rbm17	0.75	0.19	0.27	0.61	2.89892e-07	0.000360842	0.0651182	51.6	51.5	57.3	26.9	No
Rtraf	1.67	0.18	0.27	-0.49	3.42249e-14	1.01801e-08	0.120464	79.3	81.2	87.4	38.5	No
Prpf8	1.52	0	0.27	-0.09	0.967449	8.81193e-07	0.771379	77.2	73.8	82	30.8	No
Cep120	0.78	-0.08	0.27	1.92	0.0791599	0.00307109	1.92288e-12	51.2	45.1	53.5	61.5	No
Cox6a1	2.41	0.21	0.27	-0.16	1.32514e-22	7.29223e-11	0.531487	87.2	88.9	94	46.2	No
Ndufb5	2.43	0.2	0.27	-0.32	2.60704e-24	2.3562e-12	0.240965	89.5	90	94.8	50	No
Plekhb1	6.38	0.16	0.26	-0.49	6.12558e-27	3.39643e-18	0.0107574	97.9	98.3	99.1	80.8	No
Rasgef1b	0.4	0.58	0.26	4.4	8.08854e-21	0.0904731	8.47639e-35	20.3	25.8	34.1	71.2	No
Chmp2a	2.65	0.2	0.26	-0.8	2.17501e-23	4.37901e-11	0.00878102	90	90.3	94.3	38.5	No
Phax	1.15	0.1	0.26	0.46	0.00103733	8.3484e-06	0.13354	68.4	66.7	74.8	38.5	No
Bnip2	0.82	0.11	0.26	0.83	0.00221413	0.00020063	0.00853116	55.4	54.1	64	40.4	No
Ccnq	0.56	0.21	0.26	0.36	1.07659e-07	0.0016405	0.28142	41.8	43	51.4	15.4	No
Rpl18a	13.24	0.41	0.26	-0.99	7.07581e-189	4.23799e-20	3.1673e-10	99.3	99.7	100	82.7	No
Cox7a2	4.36	0.14	0.26	-0.06	3.83538e-17	5.56761e-17	0.771877	97.2	97.4	98.9	73.1	No
Pop5	0.85	0.1	0.26	0.86	0.00321899	9.80005e-05	0.0049871	58	57	65.1	42.3	No
Rplp2	11.84	0.43	0.26	-1.3	7.05837e-210	9.58273e-21	3.97469e-14	99.1	99.6	100	69.2	No
Arfgef1	1.93	-0.06	0.26	1.15	0.0453722	2.5872e-06	7.61706e-08	81.1	76.3	83.4	73.1	No
Sdhaf4	0.9	0.19	0.26	-0.03	3.79652e-09	6.58748e-05	0.932208	58	58.6	66.6	23.1	No
Tomm6	3.06	0.37	0.26	-1.13	2.62838e-83	3.08303e-12	0.000165671	90.6	93.6	97.3	30.8	No
Epn1	1	-0.03	0.26	0.57	0.432346	4.74536e-05	0.0662315	64.4	60.9	69.4	36.5	No
Htatsf1	0.92	-0.13	0.26	0.36	0.000305148	0.000425575	0.28433	60.8	54.5	62	30.8	No
Ndufa12	2.74	0.21	0.26	-0.44	1.6417e-25	2.00607e-11	0.107283	90.2	91.6	95.7	48.1	No
Emc7	2.25	-0.03	0.26	0.53	0.229372	2.00929e-09	0.0212274	90	85.6	91.5	51.9	No
Snrpf	1.96	0.52	0.26	-0.62	3.65593e-105	1.26627e-08	0.0473988	79.2	85.8	91.3	40.4	No
Dph3	1.05	0.34	0.26	-0.25	4.00366e-26	5.74579e-05	0.455718	59.9	63.9	75.6	23.1	No
1500011B03Rik	0.95	0.1	0.26	-0.22	0.00195716	9.20294e-05	0.506003	61.9	59.2	70	21.2	No
2310009A05Rik	0.6	0.35	0.26	0.17	4.67839e-19	0.00157992	0.625936	41.6	46	54.7	15.4	No
Cds2	0.87	-0.06	0.26	0.49	0.110212	0.000432351	0.140936	58.6	53.7	63.4	32.7	No
Cald1	1.45	0.46	0.26	-0.51	4.1975e-41	0.000463255	0.164985	62.4	66.8	73.5	25	No
Emc6	1.09	0.09	0.26	-0.37	0.00326829	1.17226e-05	0.266718	67.5	65.7	76.5	23.1	No
Srp19	0.9	0.17	0.26	0.64	8.24392e-07	0.000249063	0.0458791	57.3	57.2	66.1	36.5	No
Mrpl57	0.71	0.24	0.25	0.4	4.62955e-11	0.00048237	0.224798	49.7	51.1	60.9	28.8	No
Kmt2d	0.67	-0.1	0.25	0.72	0.0121106	0.00256264	0.0356868	50.8	43.9	53.9	26.9	No
Vcl	3.94	0.82	0.25	-2.41	1.60307e-187	2.03189e-05	2.26096e-12	86.2	90.8	91.3	19.2	No
Slc1a7	0.07	0.2	0.25	3.95	0.402789		0.0170983	3.6	4.4	15.6	67.3	No
Dkc1	0.6	-0.06	0.25	0.16	0.168224	0.00643331	0.667408	44.7	39.8	51.3	9.6	No
Srrm4	0.12	0.24	0.25	3.66	0.0902841		0.000100797	8.1	9.7	14.7	65.4	No
Rps16	14.68	0.46	0.25	-1.14	1.66229e-258	4.9502e-21	6.89631e-14	99.2	99.6	100	82.7	No
Ifitm2	1.41	1.05	0.25	-1.72	1.83612e-116	0.0134864	6.54602e-05	39.1	58.1	66.4	1.9	No
Tenm2	3.37	0.26	0.25	-2.16	1.26871e-07	0.031655	3.36671e-06	58.6	63	68.9	15.4	No
Synj1	1.1	-0.02	0.25	1.69	0.543423	0.000661188	2.35065e-12	61.9	58.3	68.9	63.5	No
Cyc1	1.16	0.24	0.25	0.16	6.83618e-17	8.93578e-06	0.617695	66.8	69.4	77	38.5	No
Rps15a	12.67	0.5	0.25	-1.42	3.59212e-279	4.08965e-19	1.51338e-16	99.2	99.6	100	69.2	No
Rnf220	0.64	0.05	0.25	0.59	0.244001	0.00379696	0.088721	46.2	44	52.1	23.1	No
Rpl27	8.95	0.4	0.25	-1	7.16769e-184	1.7198e-19	2.15046e-08	98.8	99.4	99.8	69.2	No
Antxr2	0.15	0.23	0.25	4.48	0.113778		3.19759e-06	7.5	9	18.5	59.6	No
Cox7c	7.45	0.26	0.25	-0.85	2.02659e-84	8.75218e-21	5.93243e-06	98.9	99.3	99.8	63.5	No
Snrpb	2.11	0.39	0.25	-0.21	1.39282e-63	4.21988e-08	0.456022	83.4	86.2	91.3	44.2	No
Pin4	0.79	0.23	0.25	0	2.74267e-11	0.000286804	0.99241	54.7	56.4	67.4	11.5	No
Fau	17.38	0.37	0.25	-1.03	6.16488e-204	1.06967e-23	6.54345e-14	99.6	99.8	100	86.5	No
Atp5j2	5.33	0.23	0.25	-0.47	1.54215e-55	8.93638e-19	0.0188044	97.9	98.6	99.4	65.4	No
Mtln	1.19	0.26	0.25	-0.51	2.04038e-18	2.39637e-05	0.131641	65.9	67.9	75.1	19.2	No
Eif3g	1.19	0.27	0.25	0.19	1.08596e-20	1.78739e-05	0.533809	66.4	69.1	76.7	26.9	No
Sntg2	0.27	0.26	0.25	4.23	0.0055445	0.311629	5.36814e-13	13	15.4	24.3	86.5	No
Rpl3	10.82	0.5	0.25	-1.18	2.31014e-245	6.32446e-16	3.85123e-11	98.8	99.4	100	73.1	No
Vezf1	2.06	0.03	0.25	0.58	0.265868	9.95721e-07	0.0182824	84.2	80.9	86.3	63.5	Yes
Ktn1	4.18	-0.14	0.25	1.4	1.24933e-14	5.53815e-11	8.30748e-25	96.8	94.3	96.5	94.2	No
Tubb5	3.26	0.14	0.25	0.3	3.39693e-11	1.9789e-08	0.170108	92.9	90.2	96.2	71.2	No
Ube2m	1.41	0.1	0.25	-0.47	0.000124219	2.81424e-06	0.150179	74.7	74	80.6	28.8	No
Camk4	1.09	0.51	0.25	-1.21	1.0493e-23	0.0389172	0.00911892	41.2	47	54.9	0	No
Atp5k	4.05	0.32	0.24	-0.3	4.17342e-80	1.22638e-13	0.160461	95.5	96.8	98.3	57.7	No
Uba1	1.25	0.09	0.24	-0.19	0.0040987	3.4327e-05	0.563628	69.4	68.4	76.3	30.8	No
Hnrnpf	3.09	0.25	0.24	0.39	9.71771e-36	4.64804e-10	0.0615861	93.2	93.3	96.2	73.1	No
Rps3	12.13	0.43	0.24	-0.87	9.7831e-207	1.80836e-17	3.81082e-08	98.9	99.4	100	75	No
Mbd1	1.09	-0.02	0.24	-0.63	0.779428	0.0370392	0.163334	52.7	49.1	51.4	13.5	Yes
Rab5if	1.12	0.27	0.24	0.04	4.30438e-20	3.05098e-05	0.915176	65	68.7	74.4	34.6	No
Ndufs6	2.25	0.18	0.24	-0.87	1.26077e-16	6.05627e-09	0.00636787	87.1	87.7	92.9	30.8	No
Psma7	2.19	0.16	0.24	-0.36	3.4395e-13	4.58673e-08	0.227183	86	86.4	92.7	40.4	No
Ddx6	3.16	0.02	0.24	0.13	0.367464	1.54362e-09	0.554016	93.7	91.4	95.3	73.1	No
Alkbh5	1.34	0	0.24	0.74	0.888133	0.00017181	0.011021	71.6	67.8	77.9	53.8	No
Srrm3	0.11	0.19	0.24	4.51	0.267834		4.63479e-05	6.6	7.2	16.7	75	No
Pfdn6	1.39	0.12	0.24	-0.16	6.11495e-06	3.69402e-06	0.604075	75	75	82.2	30.8	No
Atp5a1	4.17	0.21	0.24	0.29	1.74821e-36	3.98725e-13	0.115989	97.1	97.2	99.2	88.5	No
Mrpl18	0.84	0.06	0.24	0.82	0.130177	0.000436254	0.00857453	58.8	57.4	66.2	40.4	No
Dnlz	0.61	0.13	0.24	0.12	0.00202296	0.00461563	0.738009	44.5	44.8	53.2	11.5	No
Cisd1	1.6	-0.04	0.24	-0.54	0.154687	9.89586e-07	0.0949763	81.8	77.8	85	26.9	No
Snrpd2	2.55	0.33	0.24	-1.09	1.27253e-61	8.34368e-10	0.000475006	88.9	91	95.3	32.7	No
Brd2	1.65	0.18	0.24	-0.16	7.81777e-11	1.44665e-05	0.610279	77.3	75.5	84.1	44.2	No
Osgep	0.89	0.07	0.24	0.16	0.0444784	0.000668615	0.630054	59.1	56.5	65.8	25	No
Mindy2	1.87	-0.15	0.24	0.43	6.63776e-09	8.91257e-06	0.112695	82.8	76.4	82.3	53.8	No
Rpn1	1.19	0.08	0.24	-0.04	0.00845623	9.41725e-05	0.91115	68.4	66.7	73.5	30.8	No
Rpl26	16.56	0.34	0.24	-1.46	9.35041e-153	1.74286e-19	1.60985e-20	99.5	99.6	100	71.2	No
Kank1	0.51	0.06	0.24	3.21	0.336506	0.0535708	1.25987e-28	33.9	32.2	39.9	71.2	No
Gm20139	0.12	0.16	0.24	5.21	0.422609		6.11293e-05	5.8	5.5	13.6	84.6	No
Aarsd1	0.68	0.01	0.24	0.51	0.756089	0.00313873	0.12896	51.3	47.2	54.6	26.9	No
Ifitm3	9.16	-0.05	0.24	-3.1	0.219753	0.0100665	5.77974e-15	76.3	83.4	87.1	25	No
Tpt1	40.65	0.64	0.24	-1.75	0	2.12691e-15	4.7778e-39	99.9	99.9	100	88.5	No
Rnps1	1.07	0.15	0.24	0.19	1.75721e-06	0.000182209	0.546085	64.2	63.9	71.8	32.7	No
Upf3b	1.61	0.01	0.24	1.59	0.781058	2.33567e-05	5.79475e-17	77.7	73.4	81.5	82.7	No
Rpl23a	8.86	0.24	0.24	-1.36	3.38065e-58	5.85385e-15	2.16643e-11	98.4	99.1	99.8	50	No
Ndufb7	2.88	0.13	0.24	-0.32	2.43639e-11	1.99844e-10	0.211426	92.6	92.3	96.4	55.8	No
Mir124a-1hg	0.67	0.36	0.23	5.74	3.18219e-17	0.0114634	0	35.8	40.4	45.1	100	No
Pttg1	0.64	0.26	0.23	-0.26	7.02727e-11	0.00544964	0.443425	44.1	47	54.1	1.9	No
Yeats4	0.91	0.05	0.23	0.58	0.139677	0.000770413	0.0726937	59.8	56.9	64	36.5	Yes
Mtrex	0.83	0.01	0.23	0.74	0.794723	0.00347435	0.0281308	55	51.4	59.9	30.8	No
Rpl19	13.24	0.43	0.23	-1.11	1.82203e-217	8.28911e-17	3.43386e-12	99.4	99.6	100	75	No
Rps14	18.59	0.44	0.23	-1.25	5.15234e-261	6.16867e-19	3.20502e-18	99.7	99.7	100	88.5	No
Hnrnpu	4.22	-0.01	0.23	1.07	0.772411	1.93888e-09	1.4065e-12	97.2	94.9	98.4	94.2	No
Ctbp2	1.21	0.05	0.23	0.77	0.107989	8.15731e-05	0.00654882	70.2	67.8	75.4	40.4	No
Samm50	0.7	0.17	0.23	0.28	3.2956e-06	0.00264604	0.395971	50.1	49.5	58.2	21.2	No
Rpl29	8.31	0.42	0.23	-1.23	9.30878e-180	4.50199e-15	5.28247e-10	98.4	99.1	99.8	73.1	No
Elp5	0.63	0.15	0.23	0.07	0.000213368	0.00671306	0.848427	45.8	45.6	51.6	11.5	No
Nmt1	1.32	0.41	0.23	0.67	6.30145e-47	6.04244e-05	0.0166012	66	72.6	80.4	53.8	No
Rbm18	0.66	0.08	0.23	0.56	0.0634949	0.006551	0.10738	47.7	46.1	52.1	23.1	No
Ammecr1	0.63	-0.03	0.23	2.43	0.571771	0.0462895	2.32783e-15	39.6	36	45.7	59.6	No
Tomm70a	0.73	0.02	0.23	1	0.637149	0.00871582	0.00353843	50	45.9	56.3	40.4	No
Rpl22	8.17	0.52	0.23	-1.25	3.60879e-259	3.02382e-14	4.10035e-10	98.2	99.2	99.8	71.2	No
Rsl1d1	0.97	0.17	0.23	0.95	2.58877e-07	0.000584688	0.000983518	61.4	61.2	69.7	46.2	No
Cox8a	9.98	0.23	0.23	-0.79	1.12706e-74	2.94853e-20	1.02253e-06	99.4	99.5	99.8	75	No
Rpl21	14.44	0.43	0.23	-1.19	5.60372e-234	2.453e-17	1.81289e-14	99.4	99.7	100	78.8	No
Clta	3.75	0.19	0.23	-0.55	6.56931e-28	1.101e-11	0.0261928	95.8	96	98.6	57.7	No
mt-Nd3	23.98	-0.03	0.23	-0.31	0.00256092	7.06569e-25	0.00673585	99.9	100	100	86.5	No
Pop7	0.59	0.06	0.23	0.26	0.150662	0.00797212	0.433474	46.4	43.3	51.7	13.5	No
Pdcl3	0.77	0.33	0.23	0.03	1.41302e-20	0.00165143	0.925759	51.1	54.7	62	15.4	No
Dnajc8	1.71	0.11	0.23	0.01	2.63577e-05	9.40979e-06	0.982745	79.4	79.1	86.8	44.2	No
Rpl6	10.05	0.49	0.23	-1.16	1.55507e-247	3.50267e-14	1.4946e-10	99.2	99.5	100	69.2	No
Eef1a1	24.79	0.71	0.23	-1.46	0	1.19011e-13	7.72554e-24	99.8	99.9	100	82.7	No
Psmd8	1.54	0.2	0.23	0.07	7.62569e-16	4.28202e-06	0.810517	77.3	79.2	86.1	42.3	No
Cops9	3.31	0.3	0.23	-0.93	1.98281e-63	1.26098e-10	0.00111237	92.8	94.8	96.7	38.5	No
Tmsb10	3.03	0.8	0.23	-1.73	9.84235e-186	0.000105156	3.95919e-07	82.5	88	91.8	26.9	No
Grcc10	2.77	0.18	0.23	-0.26	7.23864e-21	5.91866e-09	0.307856	91	91.3	95.7	48.1	No
Cfap36	1.67	0.01	0.23	0.45	0.618917	3.33116e-05	0.105441	79.1	75.5	82.5	44.2	No
Lsm8	0.57	0.21	0.23	0.73	2.65235e-07	0.00809438	0.0282215	42.2	44.4	51.9	26.9	No
Ndufb2	2.28	0.22	0.23	-0.15	1.659e-26	5.57054e-08	0.562397	86.6	87.7	91.8	48.1	No
Timm8b	2.14	0.11	0.23	-0.38	1.79286e-07	9.3418e-08	0.200006	87.7	86.4	92.9	44.2	No
Gabarapl2	2.97	0.19	0.22	-0.4	1.72152e-23	1.84288e-09	0.12784	92.9	93.9	97.3	51.9	No
Cox7b	3.43	0.17	0.22	-0.45	2.16843e-20	5.73474e-10	0.0750303	93.8	94.2	97.9	51.9	No
Rps5	9.8	0.55	0.22	-1.17	1.68597e-268	3.29867e-12	4.49358e-10	98.7	99.4	100	73.1	No
Eid1	2.65	-0.03	0.22	0.61	0.147581	5.349e-08	0.00344535	91.5	88.9	94.2	76.9	No
Atp1b2	6.51	0.27	0.22	-0.23	2.77033e-62	3.16046e-11	0.224329	98.9	97.8	99.2	75	No
Psmb1	2.1	0.19	0.22	-0.54	4.29437e-17	3.67344e-07	0.078603	86	86.5	89.4	34.6	No
Rpl32	12.27	0.46	0.22	-1.14	4.39192e-239	4.32199e-15	6.09981e-12	99.1	99.6	100	71.2	No
Extl2	0.59	-0.03	0.22	0.92	0.488732	0.0125817	0.00654228	46.4	41.3	50.5	26.9	No
Chd1	1.03	0.12	0.22	0.48	0.00113188	0.00407397	0.155987	58.5	57.2	65.9	36.5	No
Cct3	1.75	0.22	0.22	-0.54	2.10601e-18	1.46184e-05	0.0965488	79.6	80.2	87.1	28.8	No
Mrpl32	0.6	0.2	0.22	0.7	6.65181e-07	0.0076297	0.0350678	44.5	45.6	54.4	25	No
Tmx1	1.08	0.01	0.22	0.97	0.663262	0.000649837	0.000560593	66.5	62.8	70.2	48.1	No
Serping1	3.95	0.22	0.22	-2.8	3.27489e-14	0.000419215	3.67321e-16	85.3	88.5	91.5	3.8	No
Rps26	7.89	0.52	0.22	-1.18	1.40736e-226	3.52701e-11	1.11404e-08	98	98.9	99.8	67.3	No
Rtl8a	0.73	0.25	0.22	-0.23	4.17709e-12	0.00373692	0.495162	49.4	51.9	60.9	9.6	No
C1qbp	0.64	0.54	0.22	0.1	2.46048e-43	0.0071454	0.766441	41.3	49.1	56.8	13.5	No
Lsm5	0.6	0.32	0.22	0.31	2.31053e-16	0.00701435	0.352314	42.8	47.1	55.5	19.2	No
Rplp1	26.78	0.41	0.22	-1.26	4.15037e-241	1.12053e-17	8.91756e-23	99.8	99.9	100	90.4	No
Dnajc9	0.58	0.22	0.22	0.41	2.3635e-07	0.0152229	0.244235	42.1	42.6	51.4	17.3	No
Tigd2	0.72	0.31	0.22	0.87	7.11777e-15	0.00978376	0.0113567	47.1	49.1	55.5	36.5	No
Surf1	0.59	0.12	0.22	0.24	0.00258809	0.0109158	0.483771	44.5	44.3	52.4	13.5	No
Smc1a	2.22	-0.04	0.22	-0.01	0.0947164	1.57052e-05	0.972481	86.5	81.5	88.8	48.1	No
Ptpmt1	0.7	0.07	0.22	0.63	0.0910211	0.0062456	0.0584345	50.6	49.1	57.9	30.8	No
Suclg1	1.27	0.16	0.22	-0.25	1.66082e-08	0.000106395	0.433367	71.3	71.2	78.5	28.8	No
Rps18	13.35	0.49	0.22	-1.23	2.11601e-281	1.34872e-14	4.11271e-14	99.1	99.8	100	76.9	No
Eif1	14.21	0.19	0.22	-0.71	3.21671e-58	1.41158e-19	4.5439e-07	99.5	99.9	100	84.6	No
Rps29	32.66	0.47	0.22	-1.35	0	7.98363e-21	7.96733e-31	99.7	99.9	100	92.3	No
Trmt112	1.48	0.36	0.22	-0.76	2.10669e-43	3.11479e-05	0.0224308	72.6	77.5	84.4	23.1	No
Pgls	1.26	0.22	0.22	-0.23	4.08956e-14	0.000248342	0.483975	68.8	69.9	77.1	26.9	No
Med9	0.59	0.33	0.21	0.4	1.0873e-16	0.0105191	0.244167	41.1	46.2	53.8	19.2	No
Ubl5	5.35	0.27	0.21	-1.03	3.66193e-72	7.03589e-13	8.80117e-06	97.8	98.5	99.5	51.9	No
Serinc3	1.18	0.33	0.21	0.11	1.0547e-27	0.000762581	0.742902	63.1	67.9	74.3	28.8	No
Atp5f1	3.63	0.15	0.21	-0.05	8.29835e-18	1.28154e-10	0.802325	96.4	96.1	97	73.1	No
Synpo2	0.07	0.21	0.21	4.15	0.434614		0.0230533	3.3	3.7	13.9	59.6	No
Chchd2	8.87	0.11	0.21	-0.68	8.49607e-21	5.24935e-19	5.63602e-05	99.3	99.6	100	67.3	No
Wbp4	1.53	0.03	0.21	0.46	0.297511	0.000228419	0.107156	76.1	72.3	79	42.3	No
Dctn6	0.87	0.02	0.21	0.25	0.556772	0.0034456	0.437743	59.6	55.3	63.9	23.1	No
Polr2i	1.13	0.28	0.21	-0.44	1.07007e-22	0.000334336	0.186129	64.4	69	77.4	19.2	No
Amz2	0.77	0.09	0.21	1.27	0.0231942	0.0101696	2.52153e-05	51.8	50.2	59.8	44.2	No
Calr	4.02	-0.02	0.21	-0.8	0.317076	1.92464e-06	0.00486585	95.8	93.2	95.1	46.2	No
Isg15	3.69	-0.77	0.21	-2.12	5.22333e-70	0.0579651	1.40878e-06	78.4	68.7	68.5	3.8	No
Atp5md	3.97	0.32	0.21	-0.45	1.92498e-80	4.30653e-10	0.0537104	95.1	96.6	98.3	59.6	No
Atp5h	6.68	0.13	0.21	-0.6	1.33646e-22	8.67784e-15	0.00183798	98.7	99	99.8	65.4	No
Psmd4	1.73	0.08	0.21	-0.1	0.00325323	2.19577e-05	0.739952	82.3	80.3	85.3	42.3	No
Ubb	33.24	0.16	0.21	-0.48	2.72743e-47	3.898e-20	6.72957e-06	99.9	100	100	96.2	No
Ddx46	1.46	0.02	0.21	0.53	0.465677	0.000661233	0.0750823	74	69.9	78.4	55.8	No
Pdia4	0.85	0.09	0.21	-0.42	0.0114845	0.00498995	0.217919	56.7	54.3	63.9	7.7	No
Ate1	0.87	-0.11	0.21	0.26	0.00104522	0.00421976	0.416648	61.5	54.3	61.2	25	No
Hipk3	1.04	0.17	0.21	1.48	6.27789e-06	0.00897307	2.69415e-08	58	57	61.8	59.6	No
Tagln2	1.09	2.06	0.21	-1.38	4.24363e-305	0.099919	0.00408907	21.5	52.4	61.7	5.8	No
Pgk1	4.09	0.03	0.21	0.38	0.180244	2.36853e-08	0.0444967	96.6	94.9	97.5	84.6	No
Uqcr10	3.96	0.27	0.21	-0.54	1.09375e-58	5.86229e-10	0.0245039	95.7	96.4	98.7	55.8	No
Yif1b	0.84	0.27	0.21	0.27	3.13094e-16	0.00291236	0.404847	55.8	57	66.7	25	No
Cerkl	0.06	0.19	0.21	4.43	0.53041		0.0360213	2.5	2.9	12.3	69.2	No
Rpl39	13.74	0.66	0.21	-1.38	0	9.72846e-13	1.25545e-16	99.2	99.6	100	73.1	No
Dmd	4.71	-0.35	0.21	4.88	4.83073e-54	5.27722e-05	0	95.8	89.2	93.1	100	No
Ebna1bp2	0.86	0.24	0.21	0.2	4.35876e-13	0.00316445	0.551626	56.4	57.6	65.9	21.2	No
Matr3	2.07	0.03	0.21	-0.4	0.187159	1.82933e-05	0.194289	85.4	83.3	89.4	38.5	No
Ctr9	1.13	0.06	0.21	0.46	0.0643924	0.00294942	0.152958	64.5	61.7	71.9	42.3	No
Asna1	0.6	0.21	0.21	0.49	2.22721e-07	0.0172038	0.150949	43.5	44.4	53	19.2	No
Tomm22	1.46	0.22	0.21	-0.2	7.34056e-19	5.04311e-05	0.52684	76.5	77	84.4	30.8	No
Ahcyl1	2.18	-0.14	0.21	1.22	4.12556e-10	1.87884e-05	4.03355e-11	88.4	82.7	86.9	80.8	No
Tmem167	1.64	0	0.21	0.32	0.967466	0.000298905	0.266668	79.3	74.4	82.6	44.2	No
Napg	0.74	-0.03	0.21	1.19	0.416896	0.0127498	0.000112349	53.7	48	53.9	40.4	No
Ndufb10	2.53	0.03	0.21	-0.6	0.143645	3.02321e-07	0.0440624	91.6	89.7	93.7	46.2	No
Uba2	1	0.12	0.21	0.38	0.000335279	0.0020182	0.234657	62.9	61.3	70	34.6	No
Ccdc124	0.84	0.31	0.21	-0.09	1.7706e-20	0.00358169	0.80229	53.9	57.6	65.3	17.3	No
Atp5e	6.85	0.38	0.21	-1.13	3.85055e-163	2.11938e-13	4.70849e-08	98.3	99	99.5	65.4	No
Nars	1.64	0.05	0.21	-0.11	0.0523194	0.000102014	0.722037	80.1	77.9	83.3	38.5	No
Cct2	1.6	0.22	0.2	-0.49	2.94468e-18	7.09733e-05	0.129544	77.7	78.1	83.9	30.8	No
Eef1g	3.7	0.16	0.2	-0.71	7.36092e-18	7.41826e-08	0.00841879	94.9	95.5	96.5	57.7	No
Tspyl4	0.88	-0.19	0.2	0.8	9.80276e-08	0.0106981	0.015607	60.1	52.4	59.9	30.8	No
Nsmce4a	1.1	0.24	0.2	0.24	3.99083e-16	0.00102806	0.433578	65.1	66.5	74.4	40.4	No
Atp11b	1.28	-0.06	0.2	2.15	0.100508	0.00332885	2.7206e-28	69.6	63.5	74.1	71.2	No
Dlg4	1.4	-0.13	0.2	3	1.99675e-05	0.00176053	3.23151e-85	74.4	65.9	74	94.2	No
Igbp1	0.76	0.14	0.2	0.23	0.000201383	0.0100665	0.500952	53	51.6	57.3	21.2	No
Stxbp6	1.75	0.66	0.2	-1.64	1.66324e-42	0.0896776	0.000393673	44.8	55.9	64.2	1.9	No
Hook3	2.44	0	0.2	1.13	0.97327	8.58589e-05	7.69844e-09	87.1	83.7	90.7	67.3	No
Atp5g2	4.55	0.39	0.2	-1.02	5.48174e-127	3.74898e-10	4.54624e-05	96.5	98	99.2	48.1	No
Mrpl2	0.6	0.24	0.2	0.6	7.88047e-10	0.0198078	0.0798112	42.9	45.7	51.1	23.1	No
H2afv	4.32	0.23	0.2	-1.14	3.51407e-42	1.43534e-09	2.31426e-05	97.2	97.6	98.9	42.3	No
Tomm7	4.04	0.54	0.2	-1.35	2.14828e-209	3.40345e-09	1.37716e-06	94.2	97.5	98.1	36.5	No
Cct5	1.77	0.31	0.2	-0.27	3.24296e-36	6.79965e-05	0.375798	79	81.2	86.8	38.5	No
Cox19	0.58	0.2	0.2	0.49	1.35745e-06	0.0240087	0.156143	43.2	43.2	52.4	19.2	No
Cep250	0.66	-0.18	0.2	2.21	3.2092e-05	0.0434113	9.44615e-17	47.4	40.7	51.3	55.8	No
Cfap298	0.84	0.19	0.2	0.67	7.72107e-08	0.0100543	0.0420632	53.4	54.4	62.3	36.5	No
Mgat1	0.6	0.08	0.2	0.92	0.0588382	0.0225823	0.00622836	45.8	43.9	51.1	23.1	No
Pin1	1.01	0.2	0.2	0.25	4.53074e-11	0.00187505	0.42855	63	63	75.9	34.6	No
Mapre2	1.29	-0.05	0.2	1.15	0.28185	0.0266863	0.00032394	60.8	56.6	67.8	57.7	No
Rpl30	18.39	0.36	0.2	-1.39	9.55892e-189	3.10759e-15	4.47525e-21	99.6	99.8	100	80.8	No
Synrg	1.38	0	0.2	0.69	0.957192	0.00241933	0.0191644	71.5	67.3	76.5	51.9	No
Serbp1	4.94	0.13	0.2	0.04	4.42799e-16	3.01963e-09	0.848869	97.7	97.4	98.9	78.8	No
Usp6nl	1.17	0.08	0.2	1.45	0.030621	0.0115307	3.0978e-08	61.3	58.7	70.2	61.5	No
0610010K14Rik	0.81	0.27	0.2	-0.3	2.94715e-15	0.00637941	0.361777	53	56.5	65.8	11.5	No
Sod2	1.85	0.07	0.2	0.53	0.00820143	6.58748e-05	0.0352863	83.2	81	87.5	55.8	No
Dhx9	1.35	0.11	0.2	0.18	0.000478148	0.00193779	0.577274	70.4	68.9	77.4	40.4	No
Akap9	3.42	-0.01	0.2	0.5	0.680595	2.51858e-05	0.0214941	92.3	90.7	94.6	61.5	No
Csrp1	1.68	0.42	0.2	-1.65	1.70425e-37	0.00656915	4.48392e-06	69.1	71.2	75.9	3.8	No
Rpl22l1	3.14	0.47	0.2	-1.25	7.7998e-104	1.22555e-05	6.64342e-05	88.8	92.9	94.8	30.8	No
Rpl36	13.93	0.46	0.2	-1.44	5.84097e-279	5.35499e-14	3.07862e-18	99.4	99.8	100	71.2	No
Rpl17	14.62	0.43	0.2	-1.23	5.53262e-217	4.00304e-12	1.57094e-14	99.2	99.7	100	73.1	No
Tram1	0.88	-0.01	0.2	-0.08	0.720088	0.0102493	0.808601	58.7	54.9	61.2	15.4	No
Cul5	1.9	-0.01	0.2	1.52	0.749066	0.000662602	3.76475e-15	79.7	76.5	85.8	78.8	No
Pam16	1.21	0.12	0.2	-0.05	1.58838e-05	0.000649837	0.888613	70.9	70.7	77.3	32.7	No
Slc31a2	1.18	-0.09	0.2	1.72	0.00697139	0.00574606	1.4499e-14	68.6	62.1	69.7	73.1	No
Pdap1	2.1	0.12	0.2	-0.69	1.23894e-07	3.04337e-05	0.0313495	86.1	84.5	90.1	36.5	No
Brd3	1.15	0.08	0.2	0.78	0.0154112	0.00621838	0.0115949	64.3	62	69.7	36.5	No
Rpl37a	18.53	0.59	0.2	-1.42	0	5.51027e-14	5.71573e-22	99.5	99.9	100	82.7	No
Rpl24	11.94	0.28	0.2	-1.22	7.07877e-97	5.43122e-13	9.41838e-13	99.4	99.7	99.8	63.5	No
Usp10	0.84	-0.04	0.2	0.59	0.324093	0.0134864	0.0809361	57.2	52.5	61.2	28.8	No
Rpl15	11.11	0.39	0.2	-1.17	9.04624e-180	4.18991e-12	1.43828e-11	99.2	99.6	100	80.8	No
Spop	3.55	-0.02	0.2	-0.07	0.474688	2.64071e-05	0.771163	92.8	91.1	95.4	57.7	No
Zcrb1	1.44	0.02	0.19	0.08	0.396174	0.000380735	0.789826	77.3	73.8	81.9	36.5	No
Vps53	1.06	-0.05	0.19	0.31	0.153338	0.00821598	0.35368	63.9	59.6	66.4	30.8	No
Phf5a	0.78	0.36	0.19	0.14	3.18044e-25	0.00882309	0.6775	50.6	56	63.4	23.1	No
Psmc6	1.67	0	0.19	0.77	0.913068	0.000298802	0.00216799	82	77.2	83.8	59.6	No
Spag7	1.2	0	0.19	0.11	0.977562	0.00131633	0.721096	72.1	67.9	74.3	28.8	No
Rps4x	12.74	0.53	0.19	-1.85	1.50859e-277	7.33104e-10	1.00507e-20	98.8	99.3	99.7	63.5	No
Taf10	1.45	0.25	0.19	-0.8	2.00351e-21	0.000335288	0.0165536	73.9	75.8	83.4	21.2	No
2300009A05Rik	1.08	-0.09	0.19	0.27	0.00678657	0.00546282	0.410141	66.9	61.7	68.3	34.6	No
R3hdm2	3.38	-0.04	0.19	0.34	0.100352	5.55338e-06	0.118675	94.2	92.3	96.2	71.2	No
Cdkl5	0.22	0.25	0.19	3.67	0.0113487	0.47911	1.67597e-08	12.1	14.1	22.9	51.9	No
Lbh	1.52	-0.34	0.19	-0.3	8.23325e-29	0.0101433	0.392801	76.2	62.5	71.1	30.8	No
Sdhc	1.07	0.09	0.19	0.31	0.00787578	0.00471161	0.337511	63.6	63.1	71.1	30.8	No
Gstp1	0.73	-0.08	0.19	0.3	0.04931	0.0221586	0.365564	54.7	48.2	57.4	23.1	No
Rarb	2.19	0.04	0.19	-0.16	0.379692	0.0444942	0.6774	65.7	63.1	69.9	28.8	Yes
Kif3b	0.71	-0.05	0.19	1.44	0.270603	0.0425857	4.00971e-06	49.8	44.6	52.1	40.4	No
Poldip2	0.69	0.03	0.19	0.43	0.466325	0.0233932	0.2048	50.4	48	55.8	17.3	No
Acadvl	0.7	0.1	0.19	0.54	0.00816861	0.0196116	0.105455	50.4	49.5	56	25	No
Rufy3	2.88	-0.13	0.19	1.7	2.87721e-09	0.000114566	6.30927e-27	91.2	87.2	91.6	88.5	No
Kdm7a	0.98	-0.02	0.19	0.56	0.622379	0.0330556	0.120744	57	52.6	61.7	34.6	No
Eif3d	0.91	0.39	0.19	-0.09	8.52822e-32	0.00747723	0.791844	55	60.3	66.7	23.1	No
Cebpb	1.37	1.47	0.19	-1.52	1.47663e-207	0.09067	0.000585168	41.7	58	64.7	7.7	Yes
Myl6	5.75	0.53	0.19	-1.42	1.32276e-157	6.82629e-06	6.36453e-08	96.4	97.8	98.3	44.2	No
Gstm1	2.79	0.66	0.19	-2.34	2.23288e-126	0.00212182	4.39534e-12	80.7	86.1	88	5.8	No
Sin3a	0.77	0.1	0.19	0.18	0.0132625	0.0323187	0.604075	50.1	49.1	58.5	19.2	No
Pcdh7	1.83	1.02	0.19	-1.69	4.07529e-52	0.307147	0.00493055	30.7	43.1	51.1	11.5	No
Hras	0.84	0.11	0.19	0.01	0.00155064	0.0118686	0.987599	57	55.7	62.3	17.3	No
Parp1	0.61	-0.04	0.19	0.68	0.338148	0.0409963	0.0489151	47.6	42.5	50.3	23.1	No
Ube2j1	0.79	0.13	0.19	0.8	0.000390787	0.0220552	0.0159956	52.6	51.6	58.2	38.5	No
Spint2	1.19	0.52	0.19	-0.26	1.41947e-66	0.00270342	0.417659	61.9	69.8	75.1	26.9	No
Pcna	0.74	0.3	0.19	0.26	1.5251e-14	0.0352701	0.461517	48.2	49.5	56.3	19.2	No
Nol7	2.43	0.16	0.19	-0.28	1.95449e-14	1.73048e-05	0.308569	88.7	89.3	93.2	40.4	No
Ttc8	1.22	0.04	0.19	2.33	0.286079	0.0177862	1.72899e-28	62.9	60.5	68.1	73.1	No
Atp6v1b2	1.13	0.2	0.19	0.86	5.05224e-10	0.00973133	0.00468127	63.6	63.3	71	46.2	No
Mrpl58	0.84	0.12	0.19	0.33	0.000605364	0.011694	0.319922	57.7	56	62.6	30.8	No
Siva1	0.84	0.53	0.19	-0.57	2.48483e-53	0.00973133	0.0951862	50.7	58.9	66.7	5.8	No
Ccdc59	1.37	0.08	0.19	0.47	0.00973679	0.00243597	0.1156	72.1	71	78.5	42.3	No
Ttc39c	0.52	0.08	0.19	2.32	0.127376	0.122322	7.30638e-14	35.9	34	43.1	59.6	No
Zbtb18	1.49	-0.02	0.19	-0.39	0.432597	0.00205163	0.247551	76.8	71.8	76.8	30.8	Yes
mt-Cytb	76.16	0.05	0.19	-0.26	2.71815e-06	9.04015e-22	0.00250937	100	100	100	98.1	No
Rps12	15.12	0.29	0.19	-1.56	1.51353e-106	5.23618e-11	8.73787e-20	99.2	99.6	100	65.4	No
Rpl28	15.13	0.36	0.19	-1.48	2.64793e-177	3.10253e-12	2.59057e-19	99.6	99.7	100	71.2	No
Dnajb2	1.12	0.21	0.19	0.12	3.12537e-12	0.00476013	0.708772	64.5	65.6	69.9	34.6	No
Ndufs3	1.44	0.11	0.19	-0.14	2.00928e-05	0.000607783	0.655506	76.6	74.9	81.4	26.9	No
Rpl12	8.04	0.42	0.18	-1.13	3.62429e-149	4.89384e-08	3.93782e-08	98.3	98.9	100	61.5	No
Rps21	20.95	0.5	0.18	-1.4	0	3.70288e-13	2.78791e-23	99.6	99.8	100	82.7	No
Lsm14a	1.52	0.01	0.18	1.62	0.793349	0.00260467	3.07605e-16	75.5	72.2	77.6	80.8	No
Tmem147	1.32	0.07	0.18	-0.8	0.0145826	0.000881441	0.0159398	75.7	73.2	80.8	15.4	No
Slu7	0.86	0.14	0.18	0.15	0.000110784	0.0179293	0.658785	55.7	54.7	61.8	25	No
Ing1	0.71	0.05	0.18	0.05	0.222299	0.0380829	0.894183	49.5	47.6	53.3	9.6	No
Tmem30a	1.51	-0.14	0.18	0.05	4.31761e-07	0.00195863	0.88956	78.7	71.9	77.6	32.7	No
Aggf1	1.07	0.02	0.18	0.75	0.542736	0.00779812	0.0135653	65.6	61.5	68.9	42.3	No
Myo18a	1.36	0.21	0.18	-0.54	3.55363e-12	0.00607184	0.119612	67.2	68.9	75.4	19.2	No
Ublcp1	0.7	0	0.18	0.32	0.992835	0.0373395	0.351871	50.3	47.1	56.3	17.3	No
Trnau1ap	0.99	0.16	0.18	-0.13	2.90687e-07	0.00684003	0.69433	61.7	62.7	70.7	19.2	No
Crnkl1	0.62	0.12	0.18	0.16	0.00529442	0.0488441	0.641114	44.8	44.1	50.9	11.5	No
Gtf2b	0.59	0.14	0.18	0.3	0.00113068	0.0456422	0.379099	45	43.3	51.7	13.5	No
Mrpl9	0.59	0.23	0.18	0.89	1.44784e-08	0.0403733	0.00772933	43.7	44.1	51.6	21.2	No
Erlec1	1.56	-0.04	0.18	-0.14	0.219035	0.00234001	0.674419	77.1	73.3	80.6	32.7	No
Rps19	12.07	0.48	0.18	-1.31	1.4524e-214	2.50664e-08	5.7894e-13	99	99.4	99.8	67.3	No
Aco2	1.23	0.18	0.18	0.39	2.05512e-09	0.00431305	0.203525	67.7	67.5	75.6	44.2	No
Gspt1	1.41	0	0.18	0.92	0.946433	0.00395554	0.000510286	74.8	69.4	77.8	59.6	No
Tet3	1.64	-0.14	0.18	1.28	1.51473e-06	0.00551222	2.50371e-08	77.8	70.5	76.3	69.2	No
Cacybp	1.59	-0.08	0.18	-0.57	0.00365388	0.000746984	0.0848349	82.1	75.8	82.3	21.2	No
Mrpl51	1.14	0.12	0.18	0.26	3.32032e-05	0.00392252	0.408951	67.8	66.9	73.7	32.7	No
Fam104a	1.6	0.2	0.18	0.35	9.22203e-15	0.000697273	0.217101	78.3	78.1	82.6	44.2	No
Tecpr1	0.78	-0.14	0.18	0.25	0.000227445	0.0364359	0.459467	56.4	48.4	55.7	21.2	No
4833439L19Rik	1.02	-0.11	0.18	0.23	0.000393243	0.0111721	0.468241	65.1	59.6	68.5	28.8	No
Cct6a	1.65	0.11	0.18	-0.31	5.25699e-05	0.00135049	0.332933	79.5	76.4	85.5	32.7	No
Smim7	1.04	0.18	0.18	-0.03	9.83691e-09	0.00702284	0.934052	63.6	63.7	69.7	25	No
Uqcrc1	1.57	0.32	0.18	0.57	6.92216e-38	0.000539724	0.0288677	75.6	78.8	86.6	57.7	No
Immt	1.29	0.05	0.18	1.17	0.124763	0.00729362	2.70664e-06	70.2	66.3	73.8	63.5	No
Cox6b1	5.26	0.26	0.18	-0.86	1.5142e-66	2.07597e-09	0.000166121	97.9	98.7	99.2	57.7	No
Tmem218	0.64	0.02	0.18	1.18	0.690411	0.049261	0.000282896	47.9	44.6	52.7	36.5	No
Rabgap1l	0.93	0.13	0.18	1.93	0.0175359	0.17519	1.27741e-07	40.8	41.6	51.1	59.6	No
Hmg20b	0.85	0.15	0.18	0.32	5.97216e-05	0.023788	0.333265	55.2	54.3	60.1	26.9	Yes
Lamp1	2.29	0.2	0.18	-1.03	7.32634e-21	7.29814e-05	0.00147391	88.1	87.7	91.3	25	No
Mrpl43	1.03	0.2	0.18	-0.3	5.6798e-11	0.00505825	0.349684	65.4	65.8	74	21.2	No
Zfp804b	23.53	0.55	0.18	-3.99	1.81069e-68	0.0204871	2.89306e-31	94.4	95.3	96.2	26.9	No
Ebp	0.62	0.05	0.18	0.25	0.226827	0.0386619	0.455316	50.2	46.8	52.8	13.5	No
Pmpcb	0.71	0.18	0.18	0.29	5.85027e-07	0.0273191	0.383432	50.4	51	59.8	21.2	No
Anp32b	1.6	0.32	0.18	-0.17	1.44857e-34	0.00152067	0.590738	74.8	78	84.5	34.6	No
Knop1	0.81	0.16	0.18	0.73	4.47849e-05	0.0416467	0.0341761	51.1	50.4	59.3	26.9	No
Cox4i1	10.18	0.18	0.18	-0.76	5.23537e-50	1.33804e-12	3.28296e-06	99.4	99.7	99.8	71.2	No
Gm32442	0.1	0.1	0.18	5.19	0.655527		0.000988271	5.5	3.8	9.9	82.7	No
Zfp36	3.34	1.77	0.18	-2.59	0	0.0867976	3.36663e-10	48.3	75	79.8	5.8	No
Wwc2	2.32	0.09	0.18	1.23	0.00130148	0.00236459	1.98408e-09	82.6	81.6	87.4	73.1	No
Ctcf	1.92	0.01	0.18	0.73	0.844972	0.000970331	0.00297899	83.4	79.6	84.2	63.5	Yes
Akr1e1	0.78	0.1	0.18	-0.04	0.0100913	0.0311547	0.920481	53.2	51.7	58.8	13.5	No
Srp72	1.17	0.18	0.18	-0.15	4.08854e-08	0.0122089	0.649959	64.3	64.5	72.7	26.9	No
Cntln	1.48	-0.1	0.18	1.98	0.0108494	0.0484517	5.528e-15	63.7	59.4	66.4	67.3	No
Slc30a9	1.4	-0.12	0.18	0.45	0.000124562	0.00936915	0.144166	73	66.5	75.9	40.4	No
Mrpl12	0.56	0.29	0.18	0.18	1.51638e-13	0.051877	0.586561	41.5	44.5	51.1	9.6	No
Cct8	1.48	0.21	0.18	-0.22	5.50578e-15	0.00173695	0.475855	76.4	75.8	80.1	36.5	No
Usf2	1.59	0	0.18	-0.06	0.963771	0.00164077	0.842389	79.1	76.5	82.6	40.4	Yes
Foxp1	3.28	0.29	0.17	0.09	4.4713e-21	0.0142795	0.750872	81	81.8	88.3	48.1	Yes
Zfp106	1.97	-0.02	0.17	0.33	0.482026	0.00109246	0.220215	82.8	80.3	86.8	55.8	No
Upf3a	1.05	0.1	0.17	0.11	0.00515676	0.0165979	0.736127	62	60.5	68.6	30.8	No
Med25	1.01	0.42	0.17	-0.13	6.03874e-35	0.0193207	0.709368	55.8	61.8	68.6	23.1	No
Snrpg	2.96	0.6	0.17	-1.15	4.21727e-198	1.12501e-05	0.000167972	88.1	94.3	97.2	38.5	No
Dnajb6	2.44	0.03	0.17	0.28	0.203339	0.000103218	0.243156	90.5	88.8	92.6	59.6	No
Rps13	11.71	0.38	0.17	-1.09	5.04381e-176	6.72308e-10	8.45384e-11	99.3	99.5	100	84.6	No
Ndufa6	2.71	0.17	0.17	-0.63	6.5964e-16	5.36431e-05	0.0348738	91.2	91.1	93.2	34.6	No
Syne2	3.04	0.18	0.17	0.53	5.70984e-14	0.00122236	0.0234769	87.7	87.4	89.4	73.1	No
Polr2k	1.54	0.37	0.17	-0.61	3.30091e-47	0.00121549	0.0637324	73.6	79	84.7	26.9	No
Vcp	2.87	0.13	0.17	-0.3	5.65066e-10	3.57759e-05	0.259877	92.3	91.1	96.2	57.7	No
Usp33	1.13	-0.1	0.17	2.68	0.0047879	0.0263758	6.44203e-46	64.8	58.2	66.2	82.7	No
Tmem234	1.93	0.17	0.17	-0.41	5.34275e-13	0.000354012	0.189355	83.6	83.5	88	40.4	No
Tcf20	1.79	0.01	0.17	1.3	0.759751	0.0154916	6.28582e-08	74	70.7	79.8	63.5	No
Ranbp1	1.51	0.29	0.17	-0.62	3.80641e-26	0.00332788	0.0671297	74	75.3	81.9	21.2	No
Use1	2.07	0.16	0.17	-0.57	6.12494e-12	0.000373999	0.0736608	84.5	84.8	90.1	36.5	No
Dpm2	0.64	0.29	0.17	0.18	2.49025e-14	0.0406135	0.591667	45.6	48.5	54.6	15.4	No
Gtf2h5	1.68	0.18	0.17	-0.85	1.85538e-14	0.000613757	0.0100128	80.1	79.4	88.3	21.2	No
Med19	0.99	0.13	0.17	0.12	5.80368e-05	0.0156129	0.724609	62	60.6	68.1	23.1	No
Mlf2	2.78	-0.02	0.17	-0.45	0.437349	3.08616e-05	0.114661	93.4	90.6	93.5	50	No
Vps35	1.48	-0.1	0.17	-0.24	0.00078967	0.00553463	0.45911	76.8	71.6	77.3	30.8	No
Pfdn5	7.16	0.2	0.17	-0.88	5.43366e-46	4.05096e-09	1.13079e-05	98.3	98.8	99.7	65.4	No
Ccz1	1	0.13	0.17	0.51	0.000144819	0.0241592	0.123311	59.5	59.4	67.4	30.8	No
Txnip	1.64	1.28	0.17	-1.78	1.18203e-142	0.180401	0.000137735	37.8	57.5	63.6	5.8	No
Snrnp200	1.2	0.01	0.17	-0.07	0.885048	0.0132697	0.848541	68	65.1	72.1	28.8	No
8030462N17Rik	1.13	-0.09	0.17	1.42	0.0144081	0.0308816	5.25386e-08	65.1	59	65.8	65.4	No
Naca	7.86	0.26	0.17	-1.15	6.156e-73	1.21444e-08	1.72122e-08	98.9	99.3	100	61.5	No
Kras	1.39	-0.08	0.17	1.91	0.00382854	0.00720004	8.97728e-25	74.4	68.4	77.1	75	No
Ndufb6	1.4	0.16	0.17	-0.48	2.76249e-10	0.00192068	0.14542	76	75.1	81.5	25	No
Rpl13a	17.21	0.2	0.17	-1.1	2.55087e-52	2.44723e-09	3.37929e-13	99.6	99.8	100	84.6	No
Zmat2	1.75	0.07	0.17	-0.47	0.00398084	0.0010735	0.14194	82	80	83.9	32.7	No
Tmem258	1.78	0.55	0.17	-0.68	1.1638e-115	0.000531585	0.0361385	75.8	84.5	89.6	30.8	No
Lztfl1	1.2	-0.07	0.17	0.94	0.0398349	0.0240087	0.00172676	66.9	62.5	71	48.1	No
Smim8	0.96	0.28	0.17	0.09	3.94982e-17	0.0194557	0.78703	57.7	59.7	68.5	23.1	No
Ppm1b	1.78	-0.14	0.17	1.78	8.32548e-08	0.00394541	4.38947e-23	82.2	75	82.5	82.7	No
Fyco1	0.97	-0.01	0.17	2.89	0.790983	0.0358044	4.73483e-57	58.5	55.3	60.9	88.5	No
Actr10	1.44	0.11	0.17	-0.31	3.88316e-05	0.00317147	0.334835	75.9	74.2	80	34.6	No
Hectd1	2.43	0.04	0.17	0.26	0.139928	0.000411178	0.29608	88.3	86	92.3	61.5	No
Rpl23	21.09	0.44	0.17	-1.4	1.0337e-245	2.29967e-09	1.80612e-21	99.6	99.9	100	76.9	No
Shoc2	1.41	0.13	0.17	1.15	2.89677e-05	0.0124993	3.80229e-06	70.5	68.8	74.9	57.7	No
Ptpn21	0.77	-0.08	0.17	0.64	0.0469277	0.0695311	0.0680644	52.8	47.4	56.3	25	No
Dstn	4.16	0.45	0.17	-1.13	7.66951e-117	6.09741e-05	6.15694e-05	95.1	96.4	96.7	46.2	No
Ctdnep1	0.65	0.26	0.17	0.11	1.39841e-11	0.0491037	0.743299	45.9	48.7	54.6	11.5	No
Esrrg	1.41	0.15	0.17	0.92	0.019386	0.288432	0.0560032	40.4	42.2	51.6	53.8	Yes
Arl1	1.37	0.19	0.17	-0.31	4.50617e-12	0.00431305	0.336028	72.7	73.4	80.8	25	No
Clptm1	0.87	0.09	0.17	-0.12	0.0162722	0.0268475	0.718077	58.6	56	61.5	17.3	No
Wapl	2.71	-0.03	0.17	0.91	0.325885	0.000704518	4.69558e-06	89.9	87.4	92.9	69.2	No
Atp5d	3.44	0.17	0.17	-0.91	2.10346e-21	5.57248e-06	0.00160964	95.4	94.6	97.3	48.1	No
Acadm	1.57	-0.06	0.17	0.85	0.0199566	0.00391743	0.000771174	79.6	74.4	80.4	46.2	No
Ywhae	8.7	0.06	0.17	-0.29	2.57058e-05	2.58196e-10	0.073991	99.6	99.5	100	82.7	No
Mab21l1	1.03	0.38	0.17	0.48	4.67087e-29	0.0316329	0.147163	57.7	60.1	67.2	42.3	No
Ip6k1	1.54	0.06	0.17	0.72	0.0532783	0.008492	0.00968459	75	72.5	78.9	57.7	No
Sem1	3.05	0.33	0.17	-0.59	2.64762e-71	1.4627e-05	0.0313615	92.1	93.9	96.8	50	No
Pink1	1.84	0.08	0.17	-0.3	0.00249998	0.00140855	0.327075	80.5	79.8	85.6	36.5	No
Slc25a11	0.67	0.16	0.17	0.45	1.74626e-05	0.0506046	0.185291	48.3	48.6	55.7	23.1	No
Apc	2.49	-0.09	0.17	1.38	0.000342446	0.00307109	2.90638e-13	86.5	82.3	87.5	78.8	No
Psmc5	2.13	-0.05	0.17	-0.2	0.0246246	0.00039825	0.496624	88.8	85	92.1	46.2	No
Stip1	0.82	0.05	0.17	0.19	0.180072	0.0422012	0.580634	56.2	53.5	59	19.2	No
Rpl34	13.76	0.5	0.17	-1.39	0	2.39036e-09	8.09985e-17	99.4	99.6	100	69.2	No
Clptm1l	0.63	0.09	0.17	0.27	0.0195891	0.062555	0.420527	47.5	46.4	53.3	13.5	No
Mrpl30	1.33	0.24	0.16	-0.19	2.65364e-18	0.00518276	0.562969	71.1	72.6	79.5	32.7	No
Ppp1ca	1.66	0.32	0.16	-0.61	1.12826e-38	0.00169364	0.0637884	77.3	80.9	84.9	25	No
Hadha	1.2	0.13	0.16	0.62	3.05921e-05	0.014368	0.0413914	67	66.6	75.1	46.2	No
Rraga	1.06	0.17	0.16	0.16	3.59799e-08	0.012668	0.614638	65.3	64.9	71.5	30.8	No
mt-Nd6	0.86	-0.14	0.16	0.65	0.000150898	0.0635815	0.0613633	57.6	51	57.7	36.5	No
Rps27a	22.1	0.33	0.16	-1.21	3.84282e-162	2.38064e-10	4.58271e-19	99.6	99.9	100	78.8	No
Glrx2	1.48	-0.16	0.16	-0.35	4.63371e-10	0.00627985	0.290937	79.5	72.5	78.5	26.9	No
Cnot1	1.6	-0.08	0.16	0.9	0.00335417	0.00688661	0.000393873	78.2	72.7	81.2	63.5	No
Psmb6	2.7	0.17	0.16	-0.46	7.33653e-20	3.19399e-05	0.0975986	91.7	92.6	95	48.1	No
Oard1	0.73	0.26	0.16	0.18	9.42068e-13	0.0518491	0.599224	49.1	51.4	58.4	19.2	No
Bcas2	1.78	0.19	0.16	0.02	1.93375e-16	0.00101891	0.944052	81.7	82.8	90.1	40.4	No
Fam204a	1.17	0.07	0.16	0.26	0.0257077	0.0188377	0.415025	67.2	64.9	72.6	32.7	No
Ndufb4	2.93	0.1	0.16	-0.65	2.37048e-07	4.46027e-05	0.0246792	92.7	92	95.6	44.2	No
Ddx5	12.73	0.15	0.16	0.77	1.91447e-34	4.26217e-10	1.02865e-13	100	99.9	100	98.1	No
Rpl27a	17.05	0.38	0.16	-1.53	5.52987e-199	6.21595e-10	6.51795e-22	99.6	99.8	100	76.9	No
Snrpd3	1.76	0.23	0.16	-0.11	1.17915e-22	0.00124807	0.712065	79.7	81.7	86.8	36.5	No
Tcp1	1.24	0.17	0.16	-0.17	5.06963e-09	0.0102493	0.597685	68.5	69.3	74.9	26.9	No
Eif4e2	0.65	0.1	0.16	0.11	0.0174253	0.071204	0.752587	47.7	46.2	53.5	11.5	No
Mrpl23	1.52	0.29	0.16	-0.35	1.17877e-29	0.00319201	0.272871	74.5	77.9	83.6	34.6	No
mt-Co2	97.22	0.18	0.16	-0.69	6.04853e-88	1.95001e-17	4.06501e-19	100	100	100	100	No
Fkbp8	1.88	0.27	0.16	-0.61	1.0997e-32	0.000723324	0.0545234	82.5	84	88.6	34.6	No
Ncl	5.2	0	0.16	0.22	0.937672	2.00945e-05	0.236604	97.4	96.8	98.4	84.6	No
Ncaph2	0.59	0.09	0.16	0.3	0.0280573	0.0852275	0.369253	44.9	43.2	50.5	13.5	No
Lamtor4	1.69	0.17	0.16	-0.74	9.66914e-13	0.0010121	0.0238194	81.4	81.7	87.9	25	No
Llph	1	0.39	0.16	-0.32	1.04981e-32	0.023583	0.339887	57.9	63	69.4	19.2	No
Ctsf	1.67	0.16	0.16	-0.14	2.91575e-10	0.00234885	0.638319	80.3	79.1	84.1	32.7	No
Med6	0.67	0.08	0.16	1.16	0.0476979	0.0726176	0.000278399	48	47.1	54.3	34.6	No
Ssx2ip	2.16	-0.16	0.16	-0.21	7.62519e-08	0.0221284	0.525812	79.2	74.2	80	42.3	No
Nabp2	0.88	0.2	0.16	-0.25	1.90114e-09	0.0319288	0.461191	57.5	57.6	65.6	9.6	No
Ndufb3	2.99	0.11	0.16	-0.12	5.86645e-09	4.8167e-05	0.630719	92.8	92.8	97	57.7	No
Rer1	1.34	0.25	0.16	-0.19	5.76904e-21	0.00458523	0.543229	71.3	74.7	80.1	32.7	No
Pbrm1	2.64	0.05	0.16	0.45	0.0472973	0.0016282	0.0589016	87.2	86.2	89.6	65.4	Yes
Smc3	2.9	-0.02	0.16	0.09	0.503845	0.000358127	0.701265	92.1	90.8	93.8	50	No
Smarca4	2.07	-0.18	0.16	-0.6	8.31702e-14	0.00293467	0.0663304	86.4	79.3	86	28.8	No
Elof1	0.87	0.38	0.16	0.01	1.05259e-30	0.0257965	0.972398	53.7	60.4	67	19.2	No
Pfkl	1.85	0.08	0.16	0.45	0.0022336	0.00316158	0.090883	81.3	79.2	86.6	53.8	No
Mphosph8	1.48	0.09	0.16	0.01	0.00165601	0.013646	0.97475	73.3	70.1	77.3	38.5	No
Rps9	12.31	0.48	0.16	-1.77	1.07089e-252	7.16555e-08	1.54224e-19	99.2	99.5	99.8	59.6	No
Bace1	0.67	-0.03	0.16	1.15	0.472196	0.0796697	0.000364573	50.4	45.5	55	36.5	No
Pcif1	0.93	0.06	0.16	0.24	0.108051	0.0339372	0.456741	60.8	57.9	64.4	26.9	No
Mtfr1	0.67	-0.05	0.16	1.06	0.265885	0.0954997	0.00169614	48.7	44.8	53.3	30.8	No
Nfkbiz	3.04	1.1	0.16	-2.52	4.91217e-207	0.0685073	3.02921e-11	68.4	78.5	82.2	7.7	No
Fsd1l	1.14	0.07	0.16	1.95	0.0553074	0.0527634	2.1369e-17	60.9	60	69.1	73.1	No
Ube2e3	2.04	0.06	0.16	0.36	0.0176954	0.00252955	0.170389	84.9	82.1	89.4	50	No
Kdm4c	2.17	-0.11	0.16	3.37	1.26904e-05	0.00582454	1.51488e-148	84.4	78.8	85.2	96.2	No
Naa38	0.82	0.38	0.16	0.08	9.60959e-29	0.0345045	0.80702	52.4	57.7	62.5	21.2	No
Ctbp1	1.16	0.13	0.16	-0.61	1.0064e-05	0.0144735	0.0707461	67.8	66.8	72.2	15.4	No
Rpl13	21.87	0.42	0.16	-1.56	2.51419e-226	1.2444e-08	1.58813e-25	99.7	99.9	100	73.1	No
Dld	0.82	0.09	0.16	0.77	0.0153166	0.0466156	0.0168672	55.4	54.5	60.1	34.6	No
Vps29	1.32	0.12	0.16	0.06	3.56669e-05	0.00817176	0.850968	73	71.1	75.4	38.5	No
Tent4b	1.03	-0.07	0.16	1.11	0.0882262	0.0901652	0.000814263	58.2	52.7	58.8	44.2	No
Ier3ip1	1.84	0.16	0.16	-0.69	1.07002e-11	0.00117842	0.033762	84	83.3	86.1	25	No
Tpi1	5.07	0.32	0.16	-0.25	2.65043e-65	0.000155153	0.241882	96.6	97.2	98.6	76.9	No
Rabac1	3.58	0.05	0.16	-0.6	0.00247148	7.71116e-06	0.0220742	96.5	95.7	98.1	53.8	No
Acyp1	0.79	0.2	0.16	0.19	4.79167e-08	0.0532279	0.577217	53.2	53.6	62	21.2	No
Rnf11	1.64	-0.05	0.16	0.54	0.0729877	0.00589007	0.0490139	80.4	76.7	81.1	50	No
Gpx1	0.84	0.45	0.16	-0.44	3.82063e-38	0.0443256	0.20186	50.5	57.7	63.6	9.6	No
Atp6v0b	3.39	0.1	0.16	0.59	6.19541e-08	1.59836e-05	0.0014541	96.4	94.7	97.3	88.5	No
Ddx18	0.91	0.31	0.16	0.2	9.92749e-20	0.0420261	0.550511	55.1	58.5	66.4	25	No
Rpl7	16.4	0.34	0.16	-1.74	4.81709e-158	8.85176e-09	5.45379e-24	99.3	99.7	100	71.2	No
Psmc1	0.99	0.22	0.16	-0.18	8.09748e-12	0.0332598	0.598649	59.8	61.2	66.2	17.3	No
Cntf	1.02	0.57	0.16	-0.99	5.71293e-40	0.141281	0.0170165	45.3	53	57.9	3.8	No
Ro60	2.53	-0.2	0.16	0.51	6.97743e-19	0.00291183	0.0352261	90.1	83.9	89.6	59.6	No
Larp4	1.05	0.03	0.16	1.03	0.400592	0.0608607	0.000909829	61.3	57.6	65.3	46.2	No
Ndufa7	4.93	0.23	0.16	-0.74	2.04862e-51	1.0491e-06	0.00148756	97.2	98.2	99.5	50	No
Lsm3	0.61	0.27	0.16	-0.2	4.17763e-12	0.0821916	0.55754	44.4	46.9	54.7	0	No
4931406P16Rik	0.93	0.31	0.15	1.58	8.48483e-17	0.0744662	2.59721e-09	52.3	55.4	62.3	57.7	No
Rb1cc1	2.16	-0.02	0.15	-0.05	0.589426	0.00647653	0.860371	84.6	80.5	85	40.4	No
Lsm12	1.06	0.05	0.15	0.26	0.125565	0.0247985	0.406666	66.3	62.6	70	32.7	No
mt-Co3	117.6	0.16	0.15	-0.63	7.69319e-60	4.34019e-13	1.23833e-14	100	100	100	98.1	No
Foxp2	5.75	0.5	0.15	-3.27	2.9863e-31	0.179794	1.07343e-14	64.9	73.4	81.1	7.7	Yes
Ndufaf8	1.23	0.3	0.15	-0.37	3.23019e-25	0.0186148	0.272219	66.6	69	77.8	26.9	No
Tiparp	1.06	0.64	0.15	-0.01	7.21279e-45	0.181874	0.9882	46	52	58.4	19.2	No
Atp5j	5.62	0.14	0.15	-0.96	2.41284e-22	3.28958e-07	3.16014e-05	98.4	98.5	99.8	61.5	No
Ptp4a2	3.03	0.1	0.15	0.46	1.18377e-05	0.00141451	0.0381203	91	89.4	93.5	69.2	No
Atp6v0a1	1.32	0.03	0.15	0.81	0.443051	0.0345349	0.00667955	69.5	66.6	73.8	51.9	No
Mrpl55	0.56	0.23	0.15	0.55	1.1354e-08	0.0983184	0.101695	43.3	45	50.3	21.2	No
Pcf11	1.01	0.03	0.15	1.05	0.36543	0.0588041	0.000544962	61	58	63.9	44.2	No
Btf3	5.21	0.35	0.15	-1.13	3.7803e-109	4.28e-06	4.74367e-06	97.8	98.6	99.7	51.9	No
Mia3	1.59	-0.01	0.15	0.03	0.783266	0.0134748	0.94099	76.8	74.1	78.5	36.5	No
Map1lc3b	2.63	0.29	0.15	-0.4	1.65835e-42	0.000831439	0.160314	89.5	90.9	94.2	50	No
Bud31	0.73	0.1	0.15	-0.02	0.00540796	0.0707263	0.965146	52.9	51.7	58	11.5	No
Park7	4.41	0.21	0.15	-0.71	1.06594e-42	3.36171e-06	0.00365654	97.5	97.4	98.4	51.9	No
Mapre3	1.36	-0.08	0.15	1.75	0.0165194	0.0377544	4.11683e-16	70.9	66.4	73.7	69.2	No
Ndufab1	1.83	0.07	0.15	-0.15	0.00210985	0.00279822	0.625299	84	82.8	86.8	40.4	No
Rpl38	19.19	0.54	0.15	-1.45	0	1.33305e-08	1.41446e-22	99.8	99.9	100	80.8	No
Cebpz	0.98	0.39	0.15	-0.01	1.14309e-28	0.0684057	0.98406	53.4	58.9	66.7	25	Yes
Ndufs5	3.63	-0.01	0.15	-0.13	0.772411	1.51657e-05	0.563993	96.6	96	98.1	50	No
Lats1	0.94	-0.2	0.15	0.68	1.90266e-09	0.0689525	0.0395336	63.3	54.1	61.7	30.8	No
Pebp1	7.01	0.43	0.15	-1.22	5.24353e-202	3.98503e-07	1.10011e-08	98.8	99	99.5	61.5	No
Max	1.21	0.02	0.15	0.14	0.506586	0.0275263	0.662634	69.2	66.3	72.7	32.7	Yes
Zbtb4	1.23	-0.17	0.15	0.32	5.69694e-09	0.0324603	0.310726	72	64.4	69.4	36.5	Yes
Sec14l1	1.84	-0.1	0.15	0.22	5.76571e-05	0.007966	0.445762	83.4	78.8	84.1	42.3	No
Rpl35	8.83	0.36	0.15	-1.45	6.06941e-137	9.90369e-07	3.89213e-12	98.7	99.1	99.8	55.8	No
Rps27	23.46	0.54	0.15	-1.43	0	1.75713e-08	4.76024e-25	99.8	99.9	100	86.5	No
BC005624	1.26	0.24	0.15	0.12	1.18721e-16	0.0206786	0.711281	68	69.7	78.1	36.5	No
Rplp0	10	0.79	0.15	-1.68	0	6.30031e-05	5.31371e-15	98.5	99.4	99.8	55.8	No
Lamtor2	2.07	0.13	0.15	-0.5	2.63146e-09	0.0011475	0.106837	86.8	86.1	90.4	38.5	No
Cdc5l	1.2	0.05	0.15	-0.07	0.130731	0.0450539	0.851996	66.1	64	68.6	28.8	Yes
Nol11	0.72	0.03	0.15	1.19	0.540687	0.118485	0.000232454	50.5	46.5	54.9	38.5	No
Lypla1	0.77	-0.08	0.15	0.83	0.0999611	0.168902	0.0252929	49.6	44.1	54.3	28.8	No
Yaf2	1.5	0.01	0.15	0.89	0.693324	0.0308231	0.00110113	73.7	70.1	79	46.2	No
Cirbp	2.92	0.18	0.15	1.04	5.17902e-20	0.000734512	9.50619e-10	92.2	91.1	94.8	92.3	No
Lmna	1.01	1.6	0.15	-1.2	6.77778e-227	0.22057	0.00712303	34.3	53.4	59.1	3.8	No
Socs7	1.13	-0.09	0.15	0.97	0.00757551	0.0517285	0.000958945	68	60.5	68.1	50	No
Ift27	0.61	0.23	0.15	0.48	3.43757e-09	0.111948	0.156046	44.5	45.7	53.6	21.2	No
Gns	1.05	0.15	0.15	0.41	8.88043e-06	0.0582824	0.216292	60.6	60.5	69.4	30.8	No
Rbm8a	1.45	0.23	0.15	0.09	1.81939e-19	0.0100486	0.774766	74.8	75.5	82.2	38.5	No
Hnrnpd	2.76	-0.11	0.15	0.14	2.91032e-07	0.00160509	0.57322	92.9	89.1	93.7	55.8	No
Otud7b	1.53	-0.04	0.15	1.49	0.200181	0.047174	8.82758e-11	71.1	67.7	73.7	78.8	No
Mea1	0.89	0.27	0.14	-0.1	3.28608e-16	0.0491501	0.762564	56.9	60.1	64.5	19.2	No
Snx12	1.65	-0.2	0.14	1.07	8.93291e-10	0.0800936	0.000205246	73.6	65.8	69.7	48.1	No
Med13l	2.5	0	0.14	1.11	0.991978	0.00667062	9.22472e-09	88.3	85.8	89.9	78.8	No
Scaf11	2.43	-0.04	0.14	0.28	0.0909753	0.0070017	0.274609	88.1	84.1	89.9	53.8	No
Idh3g	0.88	0.22	0.14	-0.01	6.25052e-11	0.0557322	0.985403	56.8	59.1	65	23.1	No
Chchd7	1.47	-0.04	0.14	-0.53	0.136043	0.0197393	0.111726	78	72.1	79.2	25	No
Rab6b	1.49	-0.18	0.14	0.02	2.39982e-10	0.0396184	0.955323	77	68.2	74	30.8	No
Zc3h4	0.72	0.12	0.14	0.33	0.00401788	0.130132	0.340248	48.7	48.1	55.4	19.2	No
Mrpl21	1.06	0.15	0.14	-0.01	2.63179e-06	0.0399959	0.969689	65	64.6	70.3	25	No
Bod1	1.02	0.17	0.14	-0.44	1.22322e-08	0.0381875	0.190274	63.6	64.4	69.7	13.5	No
H1f0	1.8	0.85	0.14	-1.57	2.40579e-127	0.0928677	3.32051e-05	65.4	72.4	77.6	11.5	No
Stag2	3.07	-0.08	0.14	0.88	0.000828695	0.00386912	6.74185e-06	92.6	89.8	92.3	73.1	No
Gpc3	1.58	0.36	0.14	-1.62	6.28514e-15	0.248412	0.000292975	50.2	57.3	59.8	0	No
Grpel1	1.28	0.21	0.14	-0.06	1.3884e-14	0.0186945	0.859349	71.6	72.4	77.8	28.8	No
Rpl36a	7.49	0.46	0.14	-1.29	1.59053e-180	3.69632e-05	4.08866e-09	97.8	98.6	99.7	48.1	No
Eloc	1.74	0.07	0.14	-0.15	0.0083942	0.0070017	0.622331	83.1	80.2	85.3	44.2	No
Coa3	1.42	0.17	0.14	-0.52	4.60399e-11	0.0124313	0.114243	75.3	76.1	80.6	26.9	No
Togaram1	0.78	0.02	0.14	0.85	0.658738	0.176407	0.0197799	49.2	46.2	52.1	25	No
Clpp	1.03	0.2	0.14	0.61	6.4824e-10	0.0535465	0.0541048	61.8	62.5	70	38.5	No
Sdc4	3.13	0.79	0.14	-1.19	8.15452e-218	0.0116763	0.000244868	86.8	91.1	94	40.4	No
Slirp	1.65	0.21	0.14	-0.91	1.1201e-17	0.00954029	0.00646094	78.1	80.1	87.1	23.1	No
Rpl11	14.85	0.32	0.14	-1.47	9.07405e-146	1.26813e-07	1.09095e-18	99.4	99.8	100	69.2	No
Usp7	1.4	-0.07	0.14	-0.15	0.0156912	0.0292439	0.650151	76.1	70	75.4	26.9	No
Ctsb	3.86	0.2	0.14	-1	1.52534e-29	0.000351117	0.000422058	95.9	95.5	97	46.2	No
Oxct1	2.13	0.14	0.14	1.33	9.85565e-08	0.0193778	2.31491e-11	81.4	80.5	87.1	69.2	No
Rpl14	9.58	0.24	0.14	-1.32	3.06005e-67	1.57802e-06	1.73947e-11	98.8	99.4	100	55.8	No
Polr2a	1.67	0.11	0.14	0.48	0.000937818	0.055359	0.11324	73.4	72.2	76.8	48.1	No
Rps23	19.17	0.29	0.14	-1.49	5.05689e-129	8.76463e-08	1.0114e-22	99.5	99.8	100	73.1	No
Gm17057	0.07	0.17	0.14	4.98	0.567339		0.0188428	2.8	2.7	10.9	76.9	No
Trir	1.93	0.09	0.14	-0.44	0.000295278	0.00628638	0.160461	84.8	84	85.8	30.8	No
Retreg2	1.16	0.08	0.14	-0.51	0.0108374	0.0353162	0.128906	69.7	66.9	73.8	17.3	No
Ddit4	0.92	-0.05	0.14	0.78	0.30581	0.172815	0.0319486	56	49.8	59.1	42.3	No
Cct7	1.47	0.24	0.14	-0.32	4.59046e-20	0.015276	0.324447	74.5	76.5	81.4	36.5	No
Rbm3	1.85	0.43	0.14	-0.73	6.54009e-58	0.0218576	0.0315386	77.5	80.2	84.2	32.7	No
Ssr4	1.42	0.26	0.14	-0.65	5.10034e-22	0.0191693	0.0514581	72.9	74.4	80.6	23.1	No
Leo1	0.74	-0.1	0.14	0.42	0.0117793	0.137458	0.226086	54.2	47.5	54.7	23.1	No
Mrpl11	0.82	0.13	0.14	0.03	0.000162288	0.0804355	0.932208	57.7	55.9	60.6	17.3	No
Yipf3	0.96	0.18	0.14	-0.11	4.6949e-09	0.0540333	0.738218	61.3	62	70	23.1	No
Atp9a	1.2	0.16	0.14	-0.57	8.45115e-07	0.0589344	0.105215	66.1	65.2	70.2	11.5	No
Sf3a3	0.61	0.2	0.14	0.7	1.00012e-06	0.155275	0.0415099	43.9	44.8	51.4	25	No
Cmtr1	0.69	-0.31	0.14	0.63	1.61994e-16	0.176763	0.0731981	54	42.6	49.8	19.2	No
Atf6	1.17	0.08	0.14	0.47	0.0472516	0.13855	0.190918	59.6	57.7	63.6	34.6	Yes
Dnajb11	1.17	0.04	0.14	-0.39	0.162699	0.0396081	0.237299	70.1	67.5	73.7	19.2	No
Snf8	1.01	0.18	0.14	-0.12	1.53207e-08	0.0532523	0.709947	62.9	63.7	70.7	15.4	No
Trim30a	1.79	-0.49	0.14	-1.31	1.29228e-33	0.228536	0.00228587	64.7	61.6	65.6	3.8	No
Rpl5	9.26	0.36	0.14	-0.67	4.67578e-126	4.70033e-05	0.000248548	98.5	99.3	99.8	80.8	No
Glrx3	1.52	0.2	0.14	-0.73	2.15417e-15	0.0182774	0.0290727	75.6	77	84.1	21.2	No
Fbn2	1.38	0.21	0.14	-1.21	3.32831e-05	0.29895	0.00916551	50.7	49.4	54.9	3.8	No
Ndufv2	2.11	0.1	0.14	-0.49	2.15351e-05	0.00521212	0.118132	87.4	85.3	90.7	42.3	No
Ogdh	1.63	0.01	0.14	0.63	0.694343	0.0370292	0.0250829	76.6	72.7	82	42.3	No
Eif5a	2.31	0.25	0.14	-0.49	2.16167e-30	0.00600901	0.111227	87.4	87.8	93.5	42.3	No
Srrt	1.02	-0.09	0.14	-0.25	0.00595894	0.0897643	0.45277	64.5	58.9	64.8	17.3	No
Rpl7a	7.31	0.3	0.14	-1.28	3.40502e-87	3.32348e-05	7.13995e-09	98.3	99.1	99.8	61.5	No
Gm16286	0.68	0.25	0.14	0.32	7.88464e-12	0.124321	0.336541	48.4	50.4	55.7	19.2	No
Ran	2.87	0.13	0.13	-0.64	7.11282e-10	0.00250069	0.0301529	91.7	91.5	94	42.3	No
Smarcd1	1.01	0.15	0.13	0.21	2.25928e-06	0.070995	0.521718	62.8	60.9	69.2	25	No
Clcn4	1.23	-0.08	0.13	0	0.00800849	0.0594256	0.997026	71.3	64.7	70.2	26.9	No
Sf3b5	1.53	0.21	0.13	-0.58	6.69503e-18	0.0140365	0.076506	77.1	78.3	85	28.8	No
Rpl35a	15.54	0.53	0.13	-1.51	0	2.46557e-06	8.50718e-20	99.5	99.8	100	71.2	No
Tm2d2	1.27	0.1	0.13	-0.47	0.000195557	0.030357	0.152173	73.6	71.3	77.8	21.2	No
Snhg8	2.24	0.01	0.13	0.03	0.622245	0.0138046	0.916952	85.4	83.1	89.4	50	No
Gadd45gip1	0.76	0.19	0.13	0.34	1.67386e-07	0.110773	0.305296	53.2	53.6	61.4	23.1	No
Hdac9	1.81	0.11	0.13	2.11	0.0098599	0.181966	9.50524e-16	63.5	61.9	70	67.3	No
Tnrc6c	2.86	0.07	0.13	0.9	0.0027532	0.00828146	5.26689e-06	90.7	88.7	94	71.2	No
Gtf2f1	0.68	0.09	0.13	0.2	0.0231991	0.162646	0.558985	48.4	47.2	53.5	11.5	No
Atpif1	3	0.39	0.13	-1.35	6.88185e-87	0.00199159	1.52331e-05	90.3	93.3	96.4	36.5	No
Gpc4	1.12	0.12	0.13	-0.91	0.00986877	0.25557	0.0326139	51.4	50.2	57.9	1.9	No
Psmc4	1.17	0.18	0.13	0.29	6.54501e-10	0.0388851	0.338976	69.3	68.9	73.7	32.7	No
Acly	0.69	0.12	0.13	0.7	0.00483731	0.177056	0.0451691	48.9	46.1	53.9	28.8	No
Khsrp	0.97	0.16	0.13	0.79	1.47764e-06	0.0886051	0.0113705	60.1	60	65.6	46.2	Yes
Mosmo	0.95	-0.01	0.13	0.81	0.795382	0.131542	0.0150608	59.3	55.1	62.9	36.5	No
Timm44	0.67	0.03	0.13	0.92	0.498518	0.176142	0.00711179	48.4	45.8	53.3	30.8	No
Rps3a1	14.23	0.51	0.13	-1.26	5.08348e-270	3.12836e-05	5.18399e-14	99.3	99.7	99.8	75	No
Eapp	1.67	0.08	0.13	0.01	0.00260041	0.0252823	0.985152	79.4	77.2	83.6	40.4	No
Cox17	2.59	0.04	0.13	-0.54	0.0568707	0.00318581	0.0713707	91.1	89.7	92.6	38.5	No
Sar1a	0.98	0.19	0.13	0.14	3.63212e-09	0.0783564	0.681523	61.1	60.7	70.2	26.9	No
Brd7	1.14	0.13	0.13	0.09	4.9965e-05	0.080481	0.781838	64.6	63.6	69.2	25	No
4932438A13Rik	2.61	-0.04	0.13	0.81	0.0845982	0.0137848	0.000161642	90.2	85.6	89.7	69.2	No
Mien1	2.04	0.03	0.13	-0.77	0.263425	0.0077466	0.017473	87.7	84.1	90.4	26.9	No
Rsrc2	3.37	0.1	0.13	0.74	2.2459e-07	0.00249944	7.21242e-05	94.2	93.7	96.1	75	No
Ndufa11	2.39	0.08	0.13	-0.49	0.000141369	0.00351306	0.103418	90.2	88.5	91.8	38.5	No
Tprgl	1.36	0.31	0.13	-0.87	1.85636e-29	0.0358144	0.0107214	71	73.6	79	15.4	No
Rnf7	2.37	0.24	0.13	-1.21	3.89088e-31	0.00408669	0.000167899	88	88.9	93.8	26.9	No
Dalrd3	0.69	0.38	0.13	1.66	2.36777e-23	0.153214	4.28352e-10	44.8	49.8	54.4	50	No
Mrps28	1.2	0.19	0.13	0.25	7.36512e-08	0.143988	0.473343	59.6	62.3	66.2	26.9	No
Prpf31	0.63	0.22	0.13	0.83	1.45534e-08	0.173381	0.0135827	44.1	46.8	52.4	30.8	No
Dnpep	0.64	0.28	0.13	0.05	2.41687e-13	0.162929	0.880823	45.3	48.2	53.8	9.6	No
Nop58	0.84	0.63	0.13	0.58	1.00952e-56	0.178112	0.100857	44.6	54	61.4	32.7	No
Mettl23	0.69	0.11	0.13	0.02	0.00434564	0.154734	0.962202	49.9	50	55	9.6	No
Ppm1g	0.65	0.11	0.13	0.14	0.00671412	0.198392	0.697606	47	45.3	53.6	11.5	No
Dcaf7	0.99	-0.1	0.13	0.39	0.00542958	0.122836	0.245751	63	57.1	63.9	32.7	No
Pacrg	0.8	0.76	0.13	3.55	3.12657e-26	0.532039	4.64581e-14	23.5	30.9	36	80.8	No
Mrps18a	0.78	0.23	0.13	0.42	5.98213e-11	0.119373	0.205381	53.1	55.5	62.5	25	No
Cebpd	10.55	0.96	0.13	-2.08	4.30222e-204	0.119705	1.4114e-11	93.7	95.1	96.4	40.4	Yes
Wbp2	1.88	0.04	0.13	-0.53	0.104692	0.0176422	0.0974225	84.6	81.6	84.7	34.6	No
Med4	0.69	0.08	0.13	0.53	0.0481121	0.163239	0.11523	51.4	48.7	55.2	21.2	No
Rps19bp1	0.72	0.15	0.13	0.01	4.6001e-05	0.150328	0.986481	51.2	51.7	58.2	9.6	No
Nmi	1.2	-0.45	0.13	-0.77	3.37813e-45	0.147868	0.0325613	71	57.5	62.9	1.9	No
Bola2	1.26	0.42	0.13	-0.81	2.98012e-51	0.0447732	0.0167426	66.5	73	79	15.4	No
Lsm7	0.97	0.4	0.13	0.56	1.08814e-36	0.0812553	0.0756286	58.3	64.5	69.9	40.4	No
Spata1	0.66	0	0.13	3.43	0.939885	0.351975	3.84167e-35	39.4	35.7	42.1	76.9	No
Dmac1	0.61	0.23	0.13	0.37	4.14767e-09	0.189297	0.274821	45	45.2	51.1	17.3	No
Znrd1	0.77	0.2	0.13	0.11	1.23832e-08	0.130656	0.734913	53.5	54.6	61.8	17.3	No
Eif4a3	0.84	0.32	0.13	0.39	3.97746e-21	0.115107	0.234016	53.6	57.8	62.8	26.9	No
Chchd1	1.31	0.19	0.13	-0.17	1.29294e-11	0.0448064	0.599499	71.4	72.7	79	30.8	No
Armc1	0.93	0.01	0.13	0.85	0.867027	0.112905	0.00654441	62.6	57.3	64.8	34.6	No
Smim27	0.98	0.41	0.13	-0.22	2.96046e-35	0.112315	0.520033	55.5	61.4	67.5	19.2	No
Acot1	0.74	0.57	0.13	-0.37	3.09931e-44	0.217769	0.3152	41.4	50.3	56.2	5.8	No
Rpl36al	3.01	0.36	0.13	-0.92	5.82127e-69	0.006409	0.0028403	91.5	93	94.8	42.3	No
Wdr47	1.11	-0.3	0.13	2.22	8.69358e-19	0.164067	2.11714e-23	66.8	54.6	61.2	78.8	No
Mcrs1	0.74	0.29	0.13	-0.03	2.79488e-16	0.145691	0.934755	49.1	53.8	58.4	11.5	No
Gripap1	0.97	-0.07	0.12	1.36	0.0889101	0.159601	1.50701e-06	60.2	55.1	61.8	51.9	No
Scamp1	1.18	-0.24	0.12	0.97	2.07004e-14	0.122201	0.00132909	69.9	59.5	66.1	50	No
Gpbp1	2.6	-0.02	0.12	0.58	0.460234	0.00942011	0.00888791	91.5	88.6	92.6	78.8	Yes
U2af2	1.18	0.07	0.12	0.65	0.0200355	0.078573	0.0322241	68.8	66.1	71.1	42.3	No
Dapl1	16.89	0.42	0.12	-3.47	1.07269e-101	0.00809438	4.24609e-32	99.4	99.2	99.5	30.8	No
Ddx3x	2.38	0.27	0.12	-0.12	1.71156e-28	0.0258649	0.674839	85.7	85.4	89	55.8	No
Gm19951	1	0.1	0.12	0.79	0.00806538	0.161111	0.0170952	61.2	58.2	61.7	28.8	No
Klf6	1.44	1.22	0.12	-1.71	3.4804e-165	0.277682	5.0239e-05	46.2	60.9	63.4	0	Yes
Arf5	2.72	0.3	0.12	-0.66	1.53439e-55	0.0033926	0.0245805	91.2	92.1	94.5	40.4	No
Nampt	0.67	-0.43	0.12	0.37	7.57957e-26	0.288461	0.31741	50.8	39.5	46.2	11.5	No
Mcrip1	1.16	0.17	0.12	0.03	4.22382e-09	0.070909	0.933096	67.5	68.1	73.5	25	No
Borcs7	0.66	0.06	0.12	0.81	0.181903	0.219429	0.018697	47.6	45.1	51.4	23.1	No
Aplp2	7.33	-0.07	0.12	-0.88	6.08193e-06	0.000182596	3.31698e-05	99.5	99	99.5	63.5	No
Myl9	0.86	0.96	0.12	-0.83	3.06624e-109	0.247536	0.036939	38.6	53.3	58.4	1.9	No
Kxd1	0.75	0.24	0.12	-0.15	1.4911e-11	0.160383	0.658455	51	53	59	9.6	No
Vdac1	3.49	0.2	0.12	-0.43	1.99957e-31	0.00131472	0.0882698	95.4	95.4	95.9	61.5	No
Slc16a2	2.48	0.42	0.12	-1.82	3.59687e-44	0.0989958	2.99029e-07	76.3	78.7	83.4	15.4	No
Nudt2	0.59	0.16	0.12	0.25	4.61217e-05	0.206451	0.457309	45.3	44.7	50.3	11.5	No
Prrc2b	2.06	-0.05	0.12	-0.21	0.0414215	0.0238019	0.488265	86.7	81.9	86.8	44.2	No
Pfdn1	2.25	0.21	0.12	-0.23	3.6297e-22	0.0138418	0.409076	85.8	87.3	88.3	48.1	No
Gorasp2	0.95	0.12	0.12	0.8	0.00137208	0.15244	0.0149779	58.5	56.6	62.6	36.5	No
D8Ertd738e	2.3	0.35	0.12	-0.89	7.23714e-58	0.0117244	0.00618176	85.6	89	92.4	30.8	No
Sdha	2.47	0.07	0.12	0.6	0.000740821	0.0100543	0.00727426	89.8	88.7	92.7	67.3	No
Man2a2	2.79	-0.1	0.12	0.97	2.28404e-06	0.00945854	9.66359e-08	93.2	88.6	91.3	75	No
Desi1	1.1	-0.03	0.12	1.27	0.425838	0.137531	2.6579e-06	64.8	60.6	66.6	48.1	No
Nsrp1	1.21	0.08	0.12	0.79	0.0161909	0.11137	0.00894819	66.3	64.4	68.9	40.4	No
Sec61g	4.11	0.44	0.12	-1.22	2.3271e-136	0.0014166	1.51499e-05	95.3	96.8	98.6	46.2	No
Babam1	0.98	0.22	0.12	-0.46	1.49351e-11	0.115783	0.175758	60.1	61.2	67.5	11.5	No
Strbp	5.1	-0.01	0.12	1.41	0.545607	0.00858219	6.32791e-22	96.7	95.9	97.3	96.2	No
Jpt1	0.93	0.51	0.12	-0.22	1.14843e-50	0.134048	0.52684	52.6	60.8	68.5	19.2	No
Actg1	9.78	0.89	0.12	-1.44	0	0.00835913	3.63445e-11	98.3	98.9	99.4	69.2	No
Ubr4	1.4	-0.07	0.12	0.03	0.0217305	0.0693822	0.940318	76.1	69.5	77.1	38.5	No
Vps28	1.62	0.11	0.12	0.03	8.58448e-06	0.0370572	0.928437	78.3	78.1	82.8	34.6	No
Kif2a	1.79	-0.04	0.12	1.31	0.140474	0.0623123	8.64422e-10	80.5	75.3	80.8	71.2	No
Tpd52	2.83	-0.05	0.12	1.37	0.0130621	0.0109832	7.47197e-18	92.6	89.6	93.1	86.5	No
Mrpl28	1.29	0.15	0.12	-0.51	7.65997e-08	0.0601703	0.127544	72.5	71.4	76.8	19.2	No
Bcl2	1.87	0.07	0.12	-0.94	0.0690566	0.216091	0.0184564	66.5	63.6	68.9	11.5	No
Mrpl15	0.66	0.24	0.12	0.8	2.67686e-10	0.190445	0.0158803	47.6	49.2	53.8	30.8	No
Utp11	0.9	0.19	0.12	-0.11	1.69609e-08	0.144727	0.750503	56.9	58.3	64.7	17.3	No
Taldo1	2.31	0.16	0.12	-0.55	1.84323e-14	0.0130155	0.0759219	87.7	87.5	92.6	40.4	No
Cab39l	1.1	-0.03	0.12	0.99	0.397985	0.208138	0.00291347	60	56.6	63.2	44.2	No
Ssr1	1.71	-0.1	0.12	-0.25	0.000105189	0.0534721	0.43642	82.1	75.8	80.1	36.5	No
Kif1b	8.9	-0.14	0.12	1.85	3.97528e-22	0.000373883	1.25295e-72	99.8	99.1	99.7	100	No
Med31	0.72	0.18	0.12	0.38	3.12326e-07	0.169909	0.246443	52.8	53	57.6	25	No
Timm22	0.67	0.08	0.12	0.51	0.0389146	0.203489	0.128661	50.2	47.8	54.7	19.2	No
Gpatch11	0.86	-0.05	0.12	0.8	0.194966	0.174317	0.0145205	59	53.6	59.5	38.5	No
Gtf2a2	1.2	0.07	0.12	0.57	0.0250383	0.0748512	0.0593469	71.7	69.2	74.9	42.3	No
Psmd1	1.72	0.1	0.12	0.12	0.000546268	0.0692047	0.701883	76.8	75.3	82.6	36.5	No
Ubxn4	2.9	0.09	0.12	0.1	6.73347e-05	0.0145051	0.674736	91.4	90.2	92.1	63.5	No
Pcnp	2.27	0.09	0.12	-0.73	0.000101197	0.0214061	0.0229996	87.3	85.9	89.1	34.6	No
Eif3m	1.54	0.32	0.12	-0.45	1.69141e-35	0.0475201	0.174037	75.1	77.5	82.2	28.8	No
Ndufc1	5.09	0.22	0.12	-1.19	1.25661e-42	0.00077582	3.94747e-06	97.5	98	99.4	44.2	No
Trappc2l	0.81	0.13	0.12	-0.11	0.000181436	0.155214	0.736837	56.2	55.8	63.6	11.5	No
Mtcl1	1.16	-0.33	0.12	2.17	4.48161e-23	0.185684	9.51711e-23	68.1	56.6	63.6	71.2	No
Rbx1	4.73	0.15	0.12	-0.41	1.72922e-21	0.000556258	0.0606685	97.9	98	98.7	63.5	No
Crebrf	2.32	-0.11	0.12	0.19	2.05953e-05	0.0537185	0.497294	86.8	81.7	86	50	Yes
Tomm5	1.03	0.32	0.12	-0.5	1.55383e-25	0.0982294	0.136146	61.8	66.7	71	11.5	No
Ndufs8	1.21	0.14	0.12	-0.31	2.13711e-06	0.0828686	0.341785	70	68.5	74.8	25	No
Cops7a	0.72	0.14	0.12	0.1	0.000101248	0.192246	0.758533	51.7	51.1	56.6	15.4	No
Usp48	1.12	-0.12	0.12	0.74	0.000147298	0.144296	0.0198153	68.1	61.1	66.9	38.5	No
Tes	1.02	0.29	0.12	-0.77	5.32134e-10	0.358488	0.0763278	45.4	48.7	54.1	5.8	No
Hnrnph1	2.46	0.09	0.12	0.22	4.74366e-05	0.0268415	0.390441	88.5	87.6	92	53.8	No
Zfp706	1.88	0.12	0.12	-0.6	8.30726e-07	0.0345535	0.0657258	82.9	82.4	86.8	32.7	Yes
Psmd3	0.68	0.09	0.12	0.12	0.0257286	0.221005	0.73426	50.2	48.5	54.3	11.5	No
Cuedc2	1.96	0.13	0.12	-0.79	1.24572e-08	0.0231702	0.0150645	84.1	84.3	86.8	30.8	No
Chsy1	0.81	-0.14	0.12	1.05	0.000863441	0.284111	0.00321073	52.7	46.8	52.8	42.3	No
Nudc	2.81	0.06	0.11	-0.77	0.00454281	0.00893053	0.0120817	92.9	92.4	95.1	38.5	No
Ptgr2	0.82	-0.1	0.11	0.41	0.0108668	0.222447	0.239195	57	50.9	55.5	23.1	No
Zfp516	1.39	-0.11	0.11	1.35	0.000152319	0.124469	1.54225e-08	72.8	67.7	74.3	53.8	Yes
Heatr5a	0.57	0.09	0.11	3.24	0.126318	0.460387	4.8278e-23	32	32	39.1	59.6	No
Ewsr1	2.59	-0.03	0.11	0.18	0.275423	0.0168854	0.457539	91.9	89	92.7	59.6	No
Cggbp1	1.71	-0.07	0.11	-0.61	0.0147937	0.062698	0.0669989	81.4	77.2	79	28.8	No
Prrc2c	5.21	-0.06	0.11	0.24	0.00101325	0.00245463	0.194135	98.9	97.1	98.4	78.8	No
Nedd9	0.79	0.11	0.11	-0.32	0.025561	0.351235	0.42591	45.3	43.9	50.9	3.8	No
Vamp8	1.31	0.19	0.11	-0.45	1.5573e-11	0.0873503	0.180288	71	71.1	77.1	23.1	No
Alyref	0.78	0.25	0.11	-0.03	8.17281e-13	0.192033	0.926323	52.5	54.4	59.8	13.5	No
Txn2	1.32	0.17	0.11	-0.16	6.58195e-10	0.0828649	0.630567	71.8	72.4	78.5	30.8	No
P4hb	1.23	0.07	0.11	-0.47	0.0216715	0.110388	0.162586	70.3	67.6	74.3	17.3	No
Med16	0.58	0.3	0.11	0.48	2.32152e-13	0.276871	0.16998	40.1	44.1	51.1	15.4	No
Cnot7	0.76	0.05	0.11	0.74	0.229501	0.231724	0.028079	52.4	50.4	55.8	34.6	No
Ndufs7	2.13	0.13	0.11	0.03	1.97932e-09	0.0203691	0.906163	88.3	87.1	90.2	53.8	No
Gas5	7.04	0.14	0.11	-1.51	7.04293e-19	0.00219228	1.15767e-09	98.2	98.4	99.2	48.1	No
Dazap1	0.93	0.2	0.11	0.25	5.29244e-09	0.17929	0.458678	58.2	57.5	64.4	26.9	No
Thoc2	3.01	-0.1	0.11	0.66	7.5657e-06	0.0238412	0.0020274	93	89.3	91	75	No
Dicer1	1.12	-0.09	0.11	0.93	0.0107286	0.169077	0.00212841	67.5	60	65.5	44.2	No
Ntng2	0.35	-0.06	0.11	3.84	0.391407	0.563815	1.49357e-21	24.3	20.1	24.8	71.2	No
Akirin2	1.16	-0.06	0.11	0.68	0.0482011	0.126579	0.0264366	70	65.4	70.3	40.4	No
Ddi2	0.9	-0.12	0.11	0.72	0.00208764	0.241114	0.0369537	57.8	52.8	59.1	28.8	No
Snrpe	2.17	0.42	0.11	-0.87	9.93287e-86	0.0199383	0.00687925	84.5	88.3	89.9	30.8	No
Mylip	0.75	0.4	0.11	0.36	7.178e-19	0.360511	0.361624	40.6	44.9	51.7	25	No
Pakap.1	1.03	0.7	0.11	-0.95	1.51213e-50	0.381528	0.0292477	39.4	51.3	57.9	3.8	No
Tnpo1	3.95	-0.08	0.11	1.86	0.000105633	0.0134081	7.06102e-46	96.6	93.9	95.6	96.2	No
Ap2b1	1.96	0.18	0.11	-0.03	3.58536e-13	0.0563295	0.923796	81.9	81.1	88	36.5	No
Cmpk1	0.78	-0.1	0.11	0.74	0.00859201	0.231946	0.026643	57	50.4	55.8	30.8	No
Mettl9	1.57	-0.1	0.11	-0.28	0.000174067	0.072622	0.381238	80.5	75	79.2	30.8	No
Snrpd1	1.58	0.19	0.11	-0.06	1.04355e-13	0.0572266	0.853184	78.7	79.2	82.2	30.8	No
Ergic3	2.39	0.25	0.11	-1.06	1.03665e-35	0.0160079	0.000895775	88.4	89.5	91.2	28.8	No
Plekha4	0.97	0.52	0.11	-0.83	5.15452e-39	0.288423	0.0329603	47.5	56.2	59.8	3.8	No
Ruvbl1	0.62	0.41	0.11	0.13	2.56193e-26	0.254021	0.710548	41.9	48.1	54.1	11.5	No
Rpl37	20.16	0.47	0.11	-1.45	5.84922e-305	0.000105556	3.12105e-22	99.5	99.9	100	69.2	No
Lin7a	2.58	0.3	0.11	-2.11	3.52972e-12	0.355029	5.88439e-07	59.8	65.4	70.5	3.8	No
Myl12b	2.61	0.29	0.11	-1.27	8.16112e-48	0.0174862	6.64522e-05	89.7	90.6	93.2	25	No
Snrpc	1.16	0.26	0.11	-0.04	6.59526e-20	0.111465	0.908579	66.2	69.5	74.9	28.8	No
Zfp91	2.71	-0.03	0.11	-0.43	0.177538	0.0264759	0.143977	91.4	88.6	91.5	44.2	Yes
Pdcl	0.83	-0.15	0.11	0.25	2.14754e-05	0.233006	0.450935	59.5	51.9	58.8	17.3	No
U2af1	1.97	0.26	0.11	0.13	2.94941e-30	0.0349628	0.619874	83.6	85.1	90.7	51.9	No
Mrfap1	3.36	0.14	0.11	-0.69	1.74362e-14	0.00734525	0.0148989	94.8	94.5	97.3	40.4	No
Edf1	3.3	0.16	0.11	-1.29	6.16814e-20	0.00684003	2.53548e-05	95.1	94.3	97.3	32.7	No
Golga4	2.19	-0.08	0.11	0.53	0.00232653	0.0726136	0.039144	85.5	80.2	84.4	65.4	No
Trappc1	0.86	0.18	0.11	0	1.28175e-07	0.185934	0.9929	57.3	58.1	62.9	17.3	No
Mrps36	1.24	0.17	0.11	-0.24	1.15681e-09	0.109931	0.465126	70.3	70.4	75.4	26.9	No
Fbxo8	0.78	-0.15	0.11	1.53	7.25624e-05	0.286657	2.02315e-07	54.7	47.3	54.4	40.4	No
Eif1b	2.28	0.1	0.11	-0.73	4.48199e-06	0.0339372	0.0228929	87.9	86.6	89	28.8	No
Tshz2	4.4	0.48	0.11	-2.49	1.68924e-37	0.294649	2.81736e-10	67.2	77.4	81.5	13.5	Yes
Ptges3	2.29	0.02	0.11	-0.66	0.362148	0.0414069	0.0397069	88.1	85.7	90.4	36.5	No
Cnrip1	0.93	0.15	0.11	1.51	0.000551524	0.329301	1.57002e-06	49.6	49.9	58	48.1	No
mt-Atp6	159.28	-0.01	0.11	-0.63	0.203761	2.55183e-09	4.363e-20	100	100	100	100	No
Ufsp2	0.89	0.08	0.11	1.1	0.0318622	0.239905	0.000434255	56.9	53.9	58.8	42.3	No
Pggt1b	0.78	0.01	0.11	0.91	0.851898	0.29582	0.00924142	51.9	48	54.3	32.7	No
Swi5	3.15	0.19	0.11	-0.99	4.97446e-24	0.0110245	0.00109147	93.6	94.3	96.2	32.7	No
D430042O09Rik	1	0.06	0.11	1.91	0.157887	0.28279	8.34468e-14	55.7	54	62.3	67.3	No
Psmd12	1.32	0.12	0.11	0.02	1.14422e-05	0.110622	0.945022	73.7	71.7	75.2	32.7	No
Smarca5	2.83	0.17	0.11	-0.65	3.03321e-15	0.0380563	0.0319439	89.4	89.5	92.7	44.2	No
Polr2e	1.26	0.38	0.11	-0.86	4.80789e-41	0.115644	0.0112831	67.9	72.5	75.4	11.5	No
Higd1a	2.51	-0.01	0.11	-0.14	0.594704	0.0335451	0.615115	91.3	87.2	92.1	48.1	No
Ddit3	1.17	0.21	0.1	-0.15	2.14611e-09	0.250993	0.676395	63.7	60.5	66.6	25	Yes
Tpp1	1.52	0.1	0.1	-0.34	0.000304235	0.103964	0.292631	76.2	74.5	79.2	28.8	No
mt-Nd1	47.53	-0.05	0.1	-0.63	7.42122e-06	1.00007e-06	2.25516e-11	100	100	100	94.2	No
Klhl9	1.29	-0.08	0.1	-0.24	0.0100219	0.154593	0.472154	73.5	66.4	70.8	19.2	No
Cdk19	2.83	-0.06	0.1	1.32	0.0288521	0.133793	3.21258e-10	86	81.7	86.1	75	No
Rabggtb	0.67	0.12	0.1	0.58	0.00240895	0.309454	0.0961952	47.7	46.3	51.1	19.2	No
M6pr	0.71	0.19	0.1	0.3	8.22412e-07	0.277019	0.36645	50.1	49.2	54.3	19.2	No
Prrc2a	1.51	0.05	0.1	-0.53	0.0483676	0.0939504	0.107783	78	75.3	80	25	No
Bri3	3	0.15	0.1	-0.64	1.32886e-15	0.0195198	0.026951	93.5	93.1	95.1	34.6	No
Tomm40	0.8	0.22	0.1	0.01	1.23257e-09	0.268044	0.970639	51.9	52.5	57.6	15.4	No
Hltf	0.72	-0.04	0.1	1.75	0.437511	0.349673	2.30934e-09	49.4	44.6	51.3	42.3	No
Gde1	1.41	0.08	0.1	-0.01	0.00275876	0.114074	0.971748	75.6	72.5	77.8	36.5	No
Psmb4	2.39	0.06	0.1	-0.88	0.00505321	0.0367384	0.00668454	89.3	88.2	89.9	34.6	No
Anapc16	1.84	0.07	0.1	0.59	0.00916726	0.0871875	0.0241074	81.5	80.1	83	53.8	No
Rbp1	8.13	0.27	0.1	-3.26	7.92576e-30	0.088087	5.96645e-23	95.3	96.3	97.8	13.5	No
Snw1	2.94	0.16	0.1	-0.41	4.7408e-15	0.0346977	0.146663	92	91.6	94.6	51.9	No
Cops6	1.31	0.18	0.1	-0.31	4.86467e-11	0.116677	0.335341	72.6	72.5	76.7	25	No
Psma2	2.55	0.05	0.1	-0.28	0.0137053	0.0236939	0.317989	92.3	90.8	93.7	53.8	No
Ppil4	1.02	0.01	0.1	0.89	0.840375	0.210574	0.00388595	64.6	60.5	65.6	44.2	No
Rbmx	0.86	-0.15	0.1	0.59	1.50396e-05	0.275879	0.0829718	59.9	52.2	56.2	32.7	No
Pak1ip1	0.84	0.34	0.1	-0.25	6.11647e-22	0.251573	0.457683	53	56.2	59.6	11.5	No
Cltc	2.82	0.04	0.1	-0.32	0.12999	0.0402535	0.25051	92.4	88.5	92.9	51.9	No
Cops5	1.2	0.07	0.1	-0.02	0.0383812	0.167559	0.963832	69.3	66.7	70.7	25	No
Gm15155	3.5	0.02	0.1	-2.55	0.693375	0.441959	8.73567e-09	62.2	60.7	66.2	1.9	No
Cdc16	0.95	0.1	0.1	-0.03	0.00536838	0.240395	0.935105	60.1	57.6	62.5	19.2	No
B230219D22Rik	1.89	0.08	0.1	0.19	0.00186799	0.0766351	0.506639	83.5	81.7	85.5	48.1	No
Galnt7	2.32	-0.01	0.1	1.86	0.804331	0.153197	2.05403e-22	81.5	78.3	84.9	88.5	No
Tafa1	3.26	0.41	0.1	-2.19	1.37988e-16	0.481612	3.80229e-06	55.9	61	64.2	1.9	No
1110038F14Rik	0.87	0.24	0.1	0.68	1.179e-12	0.239701	0.0375201	55.4	57.5	62.3	28.8	No
B4galt1	0.5	0.15	0.1	3.11	0.00725518	0.481612	5.44265e-26	32.2	32.6	37.9	63.5	No
Ahnak	1.47	0.55	0.1	-1.36	2.93895e-66	0.204671	0.000141487	64.5	70.4	73.3	3.8	No
Rrp1	1.84	0.19	0.1	-0.45	1.49688e-15	0.0682256	0.161701	82.4	82.2	87.4	32.7	No
Commd3	1.37	0.18	0.1	0.37	7.31824e-11	0.14073	0.218962	72.2	71.9	79	46.2	No
Ciao2a	0.87	0.16	0.1	0.13	1.97375e-06	0.219911	0.694307	58.9	57.7	61.5	17.3	No
Ergic2	1.27	0.07	0.1	-0.33	0.0212061	0.157689	0.31589	70.6	68.8	76.2	17.3	No
Ift57	1.31	-0.1	0.1	0.17	0.000666539	0.178958	0.608365	73.7	66.4	73.7	30.8	No
Ccser1	0.91	0.24	0.1	4.11	7.60147e-05	0.546138	3.14737e-31	36.3	36.9	41.5	98.1	No
Tra2b	2.04	0.23	0.1	0.56	4.77645e-22	0.0842811	0.0255671	82.5	83.1	87.4	63.5	No
U2af1l4	0.65	0.2	0.1	0.25	2.2663e-07	0.298687	0.455316	47.6	47.9	54.6	15.4	No
Etl4	1.45	1.11	0.1	-1.57	3.50372e-89	0.526147	0.00205939	33.8	49.5	55.5	3.8	No
Bloc1s2	0.6	0.29	0.1	0.62	1.57942e-13	0.325477	0.0675563	43	45.5	52.8	21.2	No
Mrps21	2.59	0.15	0.1	-0.56	1.20046e-14	0.0301122	0.0594024	91.1	90	92.9	38.5	No
Atp2a2	2.55	-0.08	0.1	-0.16	0.000450408	0.0851894	0.590264	90.3	84.3	89.1	46.2	No
Atp6v0d1	1.49	0.08	0.1	0.14	0.00226578	0.118444	0.651707	76.8	75.1	80.3	40.4	No
Polr2g	1.14	0.09	0.1	-0.07	0.00177458	0.162929	0.821685	69	67.8	74.1	28.8	No
Nbr1	2.05	0.06	0.1	-0.7	0.0200255	0.0831416	0.0341486	85	82.6	87.5	28.8	No
Eif5b	2.81	0.2	0.1	0.08	3.95099e-18	0.0768192	0.752616	87.7	87.5	89.1	51.9	No
Eif3k	2.44	0.2	0.1	-1.06	1.4896e-22	0.0401688	0.00104613	89	89.4	93.2	23.1	No
Eif4a1	2.16	0.5	0.1	-0.33	2.57793e-82	0.11204	0.282703	80.9	83.9	88.5	42.3	No
Hmgcr	1.01	-0.23	0.1	0.27	4.51533e-10	0.33567	0.46098	63.1	52.3	61	30.8	No
Cd47	2.61	-0.17	0.1	0.32	1.87293e-14	0.0748286	0.205584	91.4	86.7	90.5	55.8	No
Cdc37	1.68	0.14	0.1	-0.24	1.92484e-08	0.0965446	0.438349	79.2	79.2	85.2	36.5	No
Trps1	2.94	-0.02	0.1	1.07	0.616395	0.257125	6.32889e-05	78.5	76.2	80.3	57.7	Yes
2610307P16Rik	1.84	0.69	0.1	-1.77	2.28335e-77	0.322408	4.5866e-06	56.2	68.8	72.1	3.8	No
Trappc13	0.82	-0.12	0.1	0.68	0.00140102	0.306384	0.0472887	57.7	51	56.6	25	No
Eif2s3x	0.94	0.49	0.1	-0.11	1.59899e-44	0.25735	0.766063	52.7	60	64.2	21.2	No
Sdf4	1.78	0.1	0.1	-1.11	5.2486e-05	0.0947479	0.000924346	81.9	80.5	84.7	15.4	No
Adgrg6	1	0.2	0.1	-0.68	6.9133e-05	0.476597	0.129722	44.2	45.2	51.3	5.8	No
Ccdc47	2.17	-0.18	0.1	0.06	1.29757e-16	0.0703686	0.837172	89.3	84	89.6	44.2	No
Rnf167	0.68	0.16	0.1	0.39	2.63182e-05	0.312972	0.252661	49.2	48.6	52.8	17.3	No
Cnot6l	1.47	-0.04	0.1	0.89	0.193475	0.194821	0.00148663	74	69.1	74.4	57.7	No
Bcl7b	0.72	0.06	0.1	0.75	0.168898	0.326603	0.0265905	51.5	48.5	53.6	30.8	No
Ppp2r2d	0.96	0.09	0.1	0.79	0.0149625	0.256924	0.0138076	59.9	57.9	64.4	34.6	No
Scnm1	0.62	0.11	0.1	0.53	0.0091225	0.335775	0.122425	46.4	46.3	51.1	19.2	No
Asrgl1	1.57	-0.23	0.1	0.94	1.4452e-14	0.220385	0.000909141	77	68.3	74.1	51.9	No
Timm13	2.28	0.21	0.1	-0.56	4.59746e-23	0.0476355	0.0670394	87.4	88.7	92.3	34.6	No
Chtop	1.14	0.12	0.1	0.02	9.31714e-05	0.19327	0.948468	67.5	65.9	70.3	21.2	No
Ubald2	0.67	0.24	0.1	-0.02	2.48846e-10	0.331577	0.958052	47.3	48.1	53.2	7.7	No
Snapc5	0.76	0.21	0.1	0.08	1.70452e-09	0.286797	0.815685	52.6	53.8	59.5	17.3	No
Ssr2	1.01	0.52	0.1	-0.24	1.75148e-63	0.195546	0.457781	58.1	67.6	71.3	19.2	No
Rheb	1.87	0.19	0.1	0.18	1.54784e-14	0.108393	0.532512	83	81.6	86.9	44.2	No
1110065P20Rik	0.75	0.21	0.1	0.17	4.39479e-09	0.292135	0.603847	52.3	53.3	55.5	17.3	No
Rpl18	10.52	0.4	0.1	-1.25	8.45711e-182	0.00234001	1.913e-11	99.3	99.7	100	67.3	No
Amotl2	1.15	0.42	0.1	-0.66	3.76101e-29	0.338434	0.0829252	56.8	59.9	60.4	9.6	No
Ube2v1	1.46	0.05	0.1	-0.69	0.0894309	0.142145	0.0385527	77.5	74	79.2	17.3	No
Bloc1s1	1.24	0.27	0.1	-0.98	5.59252e-21	0.177056	0.00405089	68.1	69.9	74.4	5.8	No
Fis1	2.68	0.1	0.09	-0.86	1.0202e-06	0.0409963	0.00620231	91.1	91.3	95.3	30.8	No
Eif4h	1.81	0.08	0.09	0.04	0.00156918	0.113178	0.908657	82.4	81.4	85.8	46.2	No
Supt5	1.06	0.09	0.09	-0.03	0.00392884	0.241502	0.942812	64.8	62.4	66.9	25	No
Arpc3	1.67	0.23	0.09	-0.94	3.65921e-21	0.101026	0.00461093	79.9	80.1	86.9	17.3	No
Dnajc12	0.97	-0.09	0.09	0.41	0.0103558	0.284111	0.219865	64.6	57.8	62.5	30.8	No
Cyhr1	1.62	-0.07	0.09	-0.18	0.00408766	0.125197	0.56254	82.4	77.6	83.9	36.5	No
Csnk2b	1.39	0.16	0.09	-0.71	1.35884e-09	0.148765	0.0334792	73.4	75	78.2	15.4	No
Stk11	0.98	0.11	0.09	0.37	0.000918726	0.250116	0.260032	61.1	60.9	68.5	32.7	No
Esf1	1.17	0.18	0.09	0.17	3.06772e-08	0.263393	0.604247	62.8	63.6	69.9	28.8	No
Erh	1.58	0.19	0.09	-0.41	1.66701e-13	0.138659	0.210333	77.6	77.7	80.9	32.7	No
Rpgr	0.6	0.49	0.09	3.36	2.54759e-19	0.549767	7.95236e-26	29.3	34.6	42.7	73.1	No
Elob	7.21	0.28	0.09	-1.24	1.03475e-96	0.00201774	1.07606e-08	98.8	99.3	99.5	51.9	No
Tln1	1.48	0.12	0.09	-0.57	2.68586e-05	0.168483	0.0904356	74.9	73.4	79.5	25	No
Cisd2	1.23	-0.14	0.09	0.69	1.01859e-05	0.250968	0.0265905	70.6	63.6	69.6	36.5	No
Cby1	0.62	0.17	0.09	0.31	2.47112e-05	0.374989	0.365541	44.8	45.9	50.6	13.5	No
Naa20	0.99	0.15	0.09	0.96	3.98395e-06	0.256392	0.00125837	61.5	61.9	66.6	34.6	No
Romo1	3.98	0.26	0.09	-1.49	1.73819e-53	0.0183924	4.82323e-07	95.4	95.8	98.1	36.5	No
Ssb	3.3	0.13	0.09	-0.21	4.29261e-13	0.0322085	0.375798	94.1	94	96.1	51.9	No
Psmb3	2.32	0.14	0.09	-0.34	1.71248e-11	0.064307	0.249476	88.4	88.5	90.2	34.6	No
Ubqln1	0.84	-0.16	0.09	-0.08	7.71816e-06	0.329561	0.829756	59.1	51.9	57.6	11.5	No
Dync1i2	2.59	0.18	0.09	0.45	2.53262e-15	0.0905388	0.0553755	87.9	88.3	92	55.8	No
Gna14	4.04	0.41	0.09	-2.51	9.06698e-28	0.385744	2.20323e-10	71.6	77	80	3.8	No
Timm23	1.34	0.11	0.09	-0.25	0.000184978	0.207501	0.437224	72.1	71	74.8	26.9	No
Zscan26	0.7	-0.05	0.09	1.58	0.289471	0.38547	6.13921e-08	51.1	45.8	52.2	44.2	Yes
Mrps7	0.59	0.22	0.09	0.44	3.0103e-08	0.369204	0.191849	44.4	46.3	50.8	17.3	No
Copz1	0.91	0.17	0.09	-0.1	4.6903e-07	0.29895	0.78267	57.8	57.9	64.2	13.5	No
Psmd11	1.86	0.12	0.09	-0.37	4.94407e-07	0.121808	0.240471	82.9	82.2	84.1	28.8	No
Phlda3	1.09	1.37	0.09	-1	7.58903e-192	0.448913	0.0184829	39.3	56.6	57.9	9.6	No
Rbbp7	1.79	0.18	0.09	-0.71	1.33084e-12	0.146167	0.0351554	80.6	79.9	85.2	25	No
Ccni	1.81	0.03	0.09	-0.65	0.318382	0.136332	0.0479409	82.7	79.2	82.6	28.8	No
Ormdl3	1.42	0.02	0.09	0.63	0.423022	0.164485	0.0241596	77.3	73.4	77.1	51.9	No
Pbx1	7.57	0.01	0.09	0.24	0.720942	0.0484517	0.199925	98.6	97.8	98.9	75	Yes
Khdrbs1	1.82	0.09	0.09	0.62	0.00163765	0.176966	0.0204271	79.7	77.9	83	51.9	No
Emc8	1.46	0.15	0.09	-0.5	3.06772e-08	0.175182	0.13138	74.4	74.3	79	23.1	No
Ppm1a	2.36	-0.09	0.09	0.26	2.22854e-05	0.0964319	0.316312	90.4	85.7	89.1	51.9	No
BC004004	0.74	-0.09	0.09	0.19	0.0185323	0.377629	0.583424	53.5	48.3	53	9.6	No
Gm2000	0.49	0.98	0.09	0.27	1.11235e-119	0.414908	0.445149	25.4	44.9	50.2	11.5	No
Arpc1a	1.25	0.13	0.09	-0.21	8.05793e-06	0.20102	0.50975	70.5	69.8	76.5	23.1	No
G3bp2	2.4	-0.15	0.09	-0.59	3.79735e-11	0.113502	0.0646128	89.5	84.5	91.8	34.6	No
Rnasek	2.32	0.05	0.09	-0.72	0.0338723	0.0799439	0.0234226	89.4	87.2	92.6	28.8	No
Ube2j2	0.85	0.09	0.09	0.48	0.0117524	0.32923	0.154423	55.8	55.3	60.3	28.8	No
Vrk3	0.73	0.14	0.09	0.23	0.000238364	0.357759	0.491615	50.3	50.8	53.9	17.3	No
Mrpl42	1.53	0.12	0.09	-0.08	1.26089e-06	0.150075	0.800933	78.5	77.5	82.5	28.8	No
Rad23b	1.08	0.03	0.09	0.78	0.35834	0.286797	0.0134264	65	61.7	68	38.5	No
Vit	1.44	0.95	0.09	-1.38	4.02562e-110	0.44333	0.00107246	42.5	61.7	67.4	3.8	No
Zfp36l2	6.44	0.58	0.09	-1.41	2.86053e-136	0.144821	3.86481e-07	95	96.8	96.8	55.8	Yes
Ndufa3	3.4	0.26	0.09	-1.03	7.67678e-49	0.0343198	0.00050964	93.2	94.6	96.8	34.6	No
Tceal9	1.97	0.21	0.09	-0.95	5.50681e-18	0.139901	0.00484131	83	82.9	87.1	23.1	No
Mab21l2	1.46	0.14	0.09	-1.37	2.82367e-05	0.325477	0.000178688	69.8	64.6	68.5	0	No
Tecr	3.64	-0.05	0.09	-0.59	0.0125426	0.0310588	0.027832	96.9	95	96.2	48.1	No
Tasp1	0.78	0.19	0.09	1.75	6.6771e-05	0.489871	1.03284e-07	42.9	43.9	50.2	46.2	No
Sumo2	6.77	0.13	0.09	-0.74	2.20125e-23	0.00395554	0.000272856	99	99.3	99.5	67.3	No
Selenok	4.36	0.25	0.09	-1.04	1.6618e-55	0.018081	0.000124389	97.8	97.8	98.3	50	No
Dnajc19	1.43	0.07	0.09	-0.26	0.0197887	0.22991	0.429177	73.2	72.8	78.1	23.1	No
Fkbp3	2.58	0.21	0.09	-0.88	1.33598e-24	0.0849604	0.00598149	89.6	89.7	92.1	28.8	No
Cox20	1.56	0.26	0.09	-0.8	1.82765e-23	0.172352	0.0176738	74.8	77.2	83.6	23.1	No
Npm1	3.59	0.28	0.09	-0.75	3.02041e-49	0.0582382	0.00857427	94.6	94.9	96.1	48.1	No
Rbbp4	1.87	0.23	0.09	0.2	1.55533e-22	0.140759	0.473502	81.5	82.6	86	50	No
Kifap3	1.97	0.06	0.09	1.26	0.0385396	0.193903	1.99503e-09	81.6	79.3	82.5	76.9	No
Rpl31	7.48	0.22	0.09	-1.23	5.8286e-52	0.00887692	1.68052e-08	98.3	98.8	99.4	51.9	No
Rbmxl1	0.81	0.29	0.09	0.38	1.64383e-16	0.33997	0.252836	52.8	54.6	59.8	26.9	No
Cbx3	3.5	0.2	0.09	-0.42	1.28336e-24	0.0582824	0.108688	94.5	94.6	96.4	55.8	No
Ywhah	1.05	0.2	0.09	-0.38	1.37906e-09	0.318149	0.280172	62.2	60.6	65.3	17.3	No
Ift81	1.05	0.07	0.09	1.33	0.0966071	0.373924	4.92492e-06	59.8	56.5	62.8	55.8	No
mt-Co1	95.79	0.23	0.09	-0.91	2.10526e-118	0.000147888	4.93373e-26	100	100	100	98.1	No
Samhd1	0.94	-0.39	0.09	0.2	3.25866e-23	0.458129	0.594458	57.4	48.6	52.4	15.4	No
Timm17b	0.62	0.22	0.09	0.33	2.44531e-08	0.393756	0.329068	45.4	46.7	53.6	13.5	No
Akr1a1	2.86	0.19	0.09	-1.44	1.03704e-23	0.0628883	4.89824e-06	91.5	92.2	94.6	25	No
Nedd8	4.04	0.23	0.09	-0.59	5.71127e-44	0.0223955	0.0176719	96.4	96.9	97.8	50	No
Vdac2	3.43	0.02	0.09	0.03	0.435937	0.038655	0.880823	95.9	94.6	97.3	63.5	No
Atp2c1	0.72	-0.09	0.09	2.38	0.0405877	0.465736	5.10325e-20	48.7	43.4	47.6	57.7	No
Arl5a	1.02	-0.23	0.09	0.11	3.19766e-12	0.346901	0.744422	66.2	56.2	61.4	25	No
Mdm2	1.06	0.25	0.09	-0.12	1.85073e-12	0.363289	0.750489	61.2	59.7	65.5	23.1	No
Cnot3	1.22	0.22	0.09	0.52	1.70876e-13	0.256924	0.093698	68	68.6	74.3	42.3	No
Bcap31	1.48	0.21	0.09	-0.7	2.54762e-16	0.180495	0.0353123	75.2	76.4	80.9	21.2	No
Ccnt1	1.19	0	0.08	1.05	0.935336	0.31232	0.000240589	67.7	63.4	66.4	40.4	No
Nsa2	1.45	0.5	0.08	-0.34	7.42443e-64	0.262784	0.315513	67.4	72.2	75.9	26.9	No
Jmy	1.17	-0.15	0.08	0.58	1.06249e-06	0.326504	0.0770327	69	61.4	66.9	36.5	No
Fth1	34.58	0.08	0.08	-1.39	4.47501e-14	0.000566069	7.36689e-31	99.7	99.9	100	76.9	No
Ranbp2	1.52	-0.03	0.08	1.09	0.41231	0.265548	1.44348e-05	75.5	70.2	74.9	59.6	No
Gps2	1.09	0.18	0.08	0.76	1.59322e-08	0.296735	0.0133999	64.8	64.3	67.7	40.4	No
Hnrnpm	3.45	0.05	0.08	0.32	0.00750833	0.0753438	0.141689	94.8	93.3	96.5	76.9	No
Manf	1.55	0.19	0.08	-0.03	3.99491e-12	0.226158	0.932781	76.1	76.2	82.2	34.6	No
Klhdc8b	0.64	0.09	0.08	0.42	0.025443	0.416988	0.214142	47.4	46.9	53.3	19.2	No
Rex1bd	1.49	0.22	0.08	-0.29	5.79422e-17	0.196823	0.365927	74.6	76.6	82.8	34.6	No
Dhx15	1.27	0.14	0.08	0.33	3.59552e-06	0.277715	0.29551	68.9	68.3	73	40.4	No
Gpr179	0.99	0.36	0.08	-0.77	3.70777e-18	0.462731	0.0523759	50.7	52.3	56	3.8	No
Ccdc12	1.59	0.15	0.08	-0.25	2.49212e-09	0.186265	0.42694	77.9	78.1	82.5	28.8	No
Snx14	0.91	-0.14	0.08	0.41	8.90742e-05	0.404693	0.236461	60.2	51.9	57.3	23.1	No
Rnf207	0.06	0.19	0.08	4	0.499165		0.0402422	3.2	3.6	9.6	59.6	No
Ick	0.84	-0.01	0.08	1.11	0.7742	0.445043	0.00116541	52.9	48.7	53.9	40.4	No
Txnrd1	1.32	0.33	0.08	-0.54	2.38914e-25	0.327931	0.134899	66	68	71.8	17.3	No
Jade1	1.08	0.1	0.08	0.5	0.00609126	0.390241	0.15199	59.8	58.9	62.8	30.8	No
Camk2g	1.03	-0.2	0.08	1.85	4.24204e-09	0.401023	9.14968e-14	62.7	54.3	58	61.5	No
Btbd1	1.98	-0.08	0.08	0.22	0.00218881	0.196386	0.43747	84.7	79.8	86.1	42.3	No
Ntan1	1.11	0.07	0.08	-0.33	0.0210632	0.297057	0.320286	66.9	64.7	71.8	17.3	No
Rbm22	0.68	0.25	0.08	0.37	1.87851e-11	0.416411	0.28467	46.9	49.2	54.6	21.2	No
Atp6v0c	7.07	0.08	0.08	-0.31	4.19594e-08	0.0108896	0.0882698	99.5	99.4	99.8	76.9	No
Prss23	1.33	0.52	0.08	-1.11	1.4508e-59	0.329561	0.00203652	64.3	69.7	72.4	5.8	No
Mtif2	1	0.09	0.08	1.18	0.0272866	0.427482	0.000215659	56.5	54.7	60.6	51.9	No
Ankrd12	5.23	-0.1	0.08	1.52	1.24533e-06	0.0982417	1.38248e-26	97.7	95.2	97	98.1	No
Gm42418	121.2	-0.17	0.08	0.74	5.63493e-43	0.00465063	2.96867e-16	100	100	100	100	No
Micos13	2.18	0.2	0.08	-1	4.09674e-22	0.112812	0.00202581	86.6	87.2	90.9	19.2	No
Rab11fip2	1.66	-0.19	0.08	-0.71	8.11993e-12	0.277013	0.0404546	80.2	72.5	75.9	17.3	No
Rpn2	1.46	0.15	0.08	0.03	6.22514e-08	0.232206	0.918202	76.2	74.3	80.1	40.4	No
Pcdh9	51.43	0.01	0.08	-4.59	0.660511	0.147243	6.1992e-59	99.9	99.5	99.5	46.2	No
Mrps33	3.03	0.13	0.08	-0.54	1.41055e-11	0.0762443	0.0563157	93.4	93	96.2	44.2	No
Larp7	0.98	0.46	0.08	-0.5	1.47719e-34	0.423512	0.173525	51.5	57.3	62.5	9.6	No
Ift20	1.61	0.08	0.08	-0.27	0.00173048	0.21677	0.398536	79.1	77.5	82.6	30.8	No
Abca1	1.33	0.54	0.08	-0.79	1.97745e-49	0.417945	0.0396386	57.7	63.5	68	17.3	No
Dtx4	1	0.27	0.08	-0.68	5.44739e-15	0.39702	0.0610813	57.9	58.7	63.4	5.8	No
Hnrnpa3	5.3	0.16	0.08	0.09	2.56955e-19	0.0658012	0.646863	97.8	97.8	98.7	84.6	No
Myb	1.15	0.59	0.08	-0.8	1.35829e-54	0.434624	0.0370948	53.6	59.7	65.1	7.7	Yes
Cript	1.2	0.19	0.08	-0.26	7.46746e-11	0.286092	0.426951	68.2	69	73.2	23.1	No
Hnrnpc	3.65	0.05	0.08	0.23	0.00635864	0.0887224	0.288955	96	94.4	95.9	67.3	No
Camta1	3.29	-0.13	0.08	2.28	5.32515e-07	0.239509	2.73845e-44	90.8	86.6	90.4	90.4	Yes
Ndufa8	1.77	0.07	0.08	-0.9	0.00537461	0.166276	0.0064022	85.3	82.1	83.6	23.1	No
Cetn3	1.87	0.18	0.08	-0.59	1.24383e-13	0.205739	0.0721561	82.6	81.8	83.9	30.8	No
Pgrmc2	1.55	-0.17	0.08	0.2	1.33919e-11	0.265568	0.50567	81.3	72.7	78.7	32.7	No
Ppp1r37	0.65	0	0.08	1.02	0.954693	0.461804	0.0022175	48.7	45.8	51.3	32.7	No
Atp6v1g1	3.32	0.08	0.08	-0.81	1.48474e-05	0.0627638	0.00554901	95.6	95.4	95.9	44.2	No
Zfp654	1.17	-0.11	0.08	2.75	0.00304721	0.449524	1.8039e-36	61.3	55.5	62.9	86.5	Yes
Limk2	0.98	-0.02	0.08	0.85	0.613592	0.425258	0.0105622	59.9	56.1	60.6	40.4	No
Tsn	2.93	0.25	0.08	-1.03	5.98365e-40	0.0972839	0.000989982	91.8	93	94.6	34.6	No
Bhlhe41	0.88	-0.09	0.08	0.78	0.01724	0.452936	0.02369	57.4	51.2	57.1	30.8	Yes
Srsf3	4.17	0.2	0.08	-0.03	1.38035e-24	0.103783	0.902179	96.3	96	98.1	73.1	No
Rtcb	0.84	0.12	0.08	0.23	0.000684579	0.401023	0.49575	56.4	55.2	61.5	21.2	No
Akap6	0.41	0.17	0.08	4.09	0.0402592	0.742715	1.23781e-17	20.2	20	28.2	69.2	No
Ssrp1	0.91	0.12	0.08	0.15	0.000599222	0.385407	0.661213	58.4	58.2	64.8	21.2	Yes
Txndc17	1.2	0.26	0.08	-0.65	4.51405e-20	0.284111	0.054479	67.8	69.9	74.6	15.4	No
H3f3b	24.85	0.77	0.08	-0.45	0	0.0380132	0.00165831	99.8	99.9	100	100	No
Srsf4	1.42	-0.09	0.08	1.27	0.00112206	0.31081	7.66712e-08	75.5	69.5	74.9	57.7	No
Cnpy2	2.03	0.18	0.08	-0.97	2.3429e-15	0.170008	0.00334814	85.6	84.8	88.8	25	No
Api5	1.04	0.08	0.08	0.36	0.0174169	0.395283	0.280138	62.1	59.6	66.7	30.8	No
Ddrgk1	2.27	-0.08	0.08	0.09	9.04587e-05	0.156419	0.746508	90.6	85.9	89.4	55.8	No
Pdcd5	2.04	0.18	0.08	-0.92	5.99735e-16	0.158209	0.00485554	85.7	86.5	90.4	23.1	No
Mt2	6.11	1.44	0.08	-2.3	0	0.375749	3.87985e-11	85.1	94.6	93.5	19.2	No
Calm2	6.18	0.28	0.08	-0.74	4.34361e-67	0.0522768	0.000929921	98.6	99.2	99.4	59.6	No
Pdhx	0.76	-0.09	0.08	0.32	0.0293694	0.459713	0.352712	54.4	48.9	53.9	17.3	No
Hmgb1	9.56	0.21	0.08	-0.9	2.81495e-52	0.0190398	8.37605e-07	99.4	99.7	100	69.2	Yes
Atp6v1c1	0.85	-0.15	0.08	0.48	3.30077e-05	0.432841	0.16334	59.6	51.9	57.1	25	No
Anapc13	2.58	0.22	0.08	-1.03	4.8882e-26	0.136656	0.00131062	89.1	90.3	92.1	32.7	No
Dynlrb1	3	0.1	0.08	-1	1.83458e-07	0.10496	0.00139386	93.7	92.6	96.7	32.7	No
Hexim1	0.83	0.15	0.08	-0.13	5.38402e-05	0.44674	0.710023	53.5	53.7	58.5	13.5	No
Tapt1	0.61	-0.01	0.08	2.54	0.795867	0.554433	2.03479e-21	42.8	38.6	45.1	65.4	No
Tenm4	1.49	-0.15	0.08	-0.99	0.00213885	0.599538	0.0308701	54.4	49.8	53.9	9.6	No
Eif3j1	1.69	0.06	0.08	0.24	0.0213586	0.272743	0.42258	79.9	77.8	81.4	42.3	No
Mrpl53	0.68	0.21	0.08	0.49	6.822e-09	0.442396	0.140821	49.3	50.9	53.8	23.1	No
Gcsh	0.99	0.24	0.08	-0.38	2.09937e-14	0.363771	0.265736	61.3	62.3	64.5	13.5	No
Wdr70	1.39	0.09	0.07	0.93	0.00954594	0.406249	0.00192986	66	66.1	73.2	57.7	No
Fam32a	0.78	0.36	0.07	0.08	6.21409e-24	0.438468	0.824131	49.6	54.1	59	17.3	No
Rtp4	0.94	-0.76	0.07	-0.17	1.92316e-56	0.632256	0.706502	54.6	35.1	37.7	3.8	No
Sp3	1.32	0.03	0.07	0.81	0.350125	0.368339	0.00630431	70.3	67.1	70.2	42.3	Yes
Glb1l2	0.76	-0.41	0.07	2.26	1.14409e-27	0.515533	4.04883e-19	57.2	43.4	48.4	65.4	No
Srrm1	3.08	0.02	0.07	0.47	0.341433	0.149177	0.0308299	93.9	91.4	94.5	65.4	No
Adnp	2.44	-0.08	0.07	0.33	0.000221452	0.187778	0.186476	90.8	86.6	89.9	61.5	Yes
Nup35	0.77	0.02	0.07	0.81	0.642422	0.482127	0.0187004	53	49.5	55.2	25	No
Herc2	1.55	-0.08	0.07	0.88	0.0121116	0.350279	0.00150105	74	70.8	74.3	53.8	No
S100a11	2.06	0.7	0.07	-1.85	6.19584e-143	0.303276	3.06127e-08	76.2	82.6	85.5	5.8	No
Sf3b2	4.12	0.06	0.07	0.07	0.00222624	0.0953555	0.732107	97	96.2	97.8	59.6	No
Arpc5	0.91	0.37	0.07	-0.04	1.75704e-27	0.416271	0.904997	55.7	59.2	65.1	21.2	No
Cecr2	1.84	-0.11	0.07	1.21	0.000658826	0.415685	4.50945e-06	75.4	68.7	74.6	61.5	No
Taf3	1.14	0.1	0.07	0.8	0.0255277	0.522971	0.0277265	55	54	59.8	30.8	No
Azi2	0.75	0.02	0.07	1.52	0.588842	0.498433	2.57293e-07	51	48.5	53	50	No
Ap1g1	1.32	-0.08	0.07	0.78	0.0159893	0.372704	0.00931275	72	67.2	74	48.1	No
Fmc1	1.63	0.37	0.07	-0.5	2.51249e-49	0.259315	0.128011	75.7	80.1	83.3	26.9	No
D5Ertd579e	1.53	-0.27	0.07	0.91	1.97622e-19	0.398633	0.0017521	76.2	66.7	71.8	48.1	No
Nfe2l2	1.3	0.26	0.07	-0.69	1.49221e-16	0.392304	0.052123	66.6	67.9	70.3	11.5	Yes
Fnta	0.96	0.08	0.07	0.57	0.016753	0.408684	0.0796539	62.6	58.9	65.9	30.8	No
Plekhb2	1.16	-0.11	0.07	0.49	0.000370443	0.374915	0.126442	70.6	63.4	67.8	36.5	No
Hnrnpa0	3.93	0.31	0.07	-0.72	7.7375e-71	0.0924083	0.00687925	95.9	96.6	97.3	61.5	No
Rps10	20.32	0.26	0.07	-1.49	7.84293e-110	0.00994317	2.78791e-23	99.6	99.9	100	78.8	No
Tnks	1.55	-0.03	0.07	0.89	0.279881	0.362256	0.0012688	75.1	71.2	76.2	42.3	No
Lpcat1	1.37	-0.37	0.07	0.86	3.10448e-42	0.371272	0.00329529	78.4	64.6	68.8	46.2	No
Armc9	0.57	0.05	0.07	2.03	0.398401	0.61177	1.02314e-09	37.7	36.5	39.6	51.9	No
Aurkaip1	1.59	0.14	0.07	-0.6	1.16735e-08	0.266032	0.0683796	78.2	78.8	83.6	21.2	No
Ptpn2	0.9	0.11	0.07	1.79	0.00841191	0.51818	1.31701e-10	51.9	51.8	56.6	63.5	No
Cebpzos	1.27	0.16	0.07	-0.36	5.63578e-09	0.327179	0.280327	70.8	70.8	73.8	19.2	No
Sap30bp	0.67	0.04	0.07	0.69	0.324183	0.514147	0.0462754	48.5	45.6	51.1	21.2	No
Ddx23	0.77	-0.11	0.07	1.1	0.00357162	0.506652	0.000938828	54.3	47.7	53.2	36.5	No
Timm17a	1	0.07	0.07	0.59	0.0398256	0.396282	0.0659602	64	63.3	66.4	30.8	No
Hnrnph3	2.8	0.03	0.07	1.17	0.123309	0.165563	2.00996e-12	93.1	91	95.1	80.8	No
Ddx24	2.14	0.06	0.07	-0.07	0.0138321	0.215977	0.806128	87.8	85.7	89.6	50	No
Cxadr	1.56	-0.16	0.07	-0.65	4.90793e-08	0.39643	0.069599	76.5	67.9	72.1	17.3	No
Ube2l3	2.16	0.12	0.07	-0.37	1.84595e-07	0.212642	0.222375	86.9	85.8	86.4	40.4	No
Gbp8	1.12	-1.65	0.07	0.03	1.34887e-289	0.650351	0.948766	62.8	37	40.1	1.9	No
Ghitm	2.16	-0.21	0.07	-0.31	4.93595e-23	0.236524	0.30965	89.5	83	82.5	32.7	No
Smarcb1	1.55	0.18	0.07	-0.21	5.96186e-12	0.298687	0.501202	75.8	77.4	81.5	25	No
Pmm1	3.27	-0.01	0.07	-0.56	0.773878	0.140488	0.0475443	94.9	93.3	94.8	48.1	No
Prdx2	6.23	0.32	0.07	-1.08	2.83623e-112	0.0403044	1.78877e-06	98.4	98.9	99.5	55.8	No
Serf2	9.23	0.28	0.07	-1.08	1.11005e-103	0.0203691	7.29459e-09	99.1	99.5	99.8	59.6	No
Rdh10	5.97	0.21	0.07	-2.87	4.44089e-17	0.30422	7.95466e-18	96.7	94.1	93.4	15.4	No
Mtx1	0.86	0.38	0.07	-0.38	1.46265e-20	0.550632	0.324658	49.2	51.2	55.5	9.6	No
Sin3b	1.1	0.33	0.07	-0.37	7.96318e-28	0.388581	0.268183	63	65.8	71.1	19.2	No
Nsfl1c	1.18	0.17	0.07	-0.56	2.46489e-09	0.359863	0.09428	68	69.8	70.3	11.5	No
Zc3h15	2.01	0.07	0.07	-0.08	0.00744899	0.280185	0.784788	84.8	81.8	85.2	36.5	No
Ift80	0.74	0.09	0.07	0.96	0.0379088	0.563344	0.00895427	46.8	45.8	50.8	36.5	No
Rab4b	0.75	0.1	0.07	0.28	0.0105861	0.486851	0.408156	53	51.3	57.6	19.2	No
Esd	1.85	0.15	0.07	-0.17	4.72114e-11	0.239701	0.568391	83.4	84	86.9	40.4	No
Psmb5	2.5	0.12	0.07	-0.63	4.46195e-09	0.167559	0.0402769	90.6	90.6	93.5	34.6	No
Malsu1	0.89	0.21	0.07	0.48	4.88496e-10	0.448953	0.143104	56.4	58.5	63.2	26.9	No
Npc1	0.95	-0.26	0.07	-0.13	2.70905e-14	0.50654	0.708046	62.8	52.2	56.6	11.5	No
Cope	1.91	0.17	0.07	-0.04	5.11113e-13	0.254038	0.888899	83.4	83	86.9	42.3	No
Dnaja2	2.51	-0.08	0.07	-0.12	8.50039e-05	0.196823	0.658785	92.6	88.1	90.1	46.2	No
St13	4.31	-0.04	0.07	0.12	0.0199724	0.126079	0.543934	97.2	95.1	97.8	71.2	No
Top1	3.94	0.09	0.07	-0.31	6.4625e-06	0.178178	0.218144	95.3	93.9	95.9	51.9	No
Pdzd2	2.47	0.26	0.07	1.74	7.0692e-16	0.448083	1.58498e-14	74.8	76.6	80.8	90.4	No
Ly6e	3.8	-0.14	0.07	-2.28	3.89098e-06	0.41241	8.66999e-11	88.2	86.1	88.8	11.5	No
Mmadhc	0.79	0.01	0.07	0.84	0.827569	0.494163	0.0112317	55.9	52.3	56.8	32.7	No
Strap	0.88	0.16	0.07	0.67	3.99747e-06	0.451706	0.0384865	58.2	58.3	60.6	34.6	No
Pik3ca	1.81	-0.07	0.07	1.42	0.00867342	0.366567	1.5088e-11	79.8	75.6	79.8	75	No
Ptms	10.43	0.08	0.07	-1.25	3.00027e-09	0.0312158	5.62874e-11	99.6	99.6	99.8	63.5	No
Ythdf2	0.76	0.21	0.07	0.28	1.25957e-08	0.513812	0.408676	50.5	51.2	53.5	21.2	No
Bex4	0.67	0.34	0.07	0.06	1.42972e-17	0.547757	0.879344	43.7	47.2	50.3	9.6	No
Calm1	8.65	0.01	0.07	-0.67	0.464775	0.0982294	0.000781641	99.3	99.2	99.7	78.8	No
Txndc9	1.19	0.11	0.07	-0.15	0.000249932	0.391793	0.647296	68.9	68.4	72.9	28.8	No
Myef2	1.26	-0.15	0.07	0.33	2.12086e-06	0.438565	0.312386	71.2	63.7	71.3	32.7	Yes
Prkca	2.01	0.69	0.07	2.69	5.18141e-82	0.510559	5.80518e-32	59.4	71.2	79.8	100	No
Bag1	1.57	0	0.07	-0.78	0.933989	0.329939	0.0198153	77.6	76.1	80.3	17.3	No
Tmem176a	1.96	0.4	0.07	-1.53	2.31795e-56	0.316338	3.71499e-06	79.1	82.3	84.2	9.6	No
Hsbp1	3.58	0.29	0.07	-0.96	2.60387e-60	0.13398	0.000899806	94.8	95.6	97.5	42.3	No
Dcakd	0.66	0.19	0.07	0.26	1.78048e-06	0.557219	0.450846	45.2	45.9	52.1	13.5	No
Zfp445	1.36	-0.05	0.07	1.78	0.147345	0.410304	1.6749e-18	74.6	67.8	71	76.9	Yes
Ifih1	1.56	-0.62	0.07	-1.09	7.94104e-61	0.581918	0.0074773	72.8	58	59.5	0	No
Blmh	0.87	0.06	0.07	0.81	0.129913	0.531148	0.0179683	54.5	52.2	60.1	30.8	No
Emg1	1.03	0.43	0.06	-0.11	1.62984e-43	0.424965	0.745494	59.9	66.5	69.6	25	No
Lamtor3	0.9	0.17	0.06	0.39	2.87748e-07	0.460135	0.237051	60.1	60	61.8	26.9	No
Tex264	0.79	0.13	0.06	0.36	0.00018364	0.48861	0.281262	56.2	55.3	61.2	21.2	No
Zbtb16	1.1	-0.3	0.06	-0.69	6.08503e-15	0.574646	0.0754974	60.7	52.8	54.3	1.9	Yes
Pcbp1	2.36	0.27	0.06	-0.25	7.74462e-35	0.251349	0.378728	86.9	88.3	92.1	46.2	No
Fam192a	0.75	0.1	0.06	0.34	0.00558789	0.521789	0.30896	53	51.7	56.5	19.2	No
Snrpb2	0.72	0.38	0.06	0.24	6.69951e-25	0.529569	0.4815	47	51.4	58.4	13.5	No
Msl2	0.83	-0.03	0.06	0.84	0.49598	0.520688	0.0116187	57.8	52.4	58.8	30.8	No
Atp11a	0.72	-0.1	0.06	1.53	0.0177829	0.567995	2.76105e-07	52.1	46.2	51.3	42.3	No
Arhgef19	1.03	0.09	0.06	-0.8	0.0126464	0.498433	0.0236193	63.4	58.6	62.3	0	No
Idh1	0.92	-0.15	0.06	0.11	4.40083e-05	0.533954	0.748009	61.2	53.1	59.1	23.1	No
Dpm3	2.11	0.28	0.06	-0.43	2.82339e-37	0.265837	0.163424	85	87.3	88.6	34.6	No
Xpnpep1	0.67	0.13	0.06	0.47	0.00167194	0.579393	0.187174	46.4	46.1	50.5	21.2	No
Stk35	3.7	-0.13	0.06	0.57	1.0571e-07	0.329656	0.0126529	94.6	88.5	91.2	76.9	No
Nlk	3.68	-0.16	0.06	2.19	2.72124e-11	0.338356	1.59506e-43	91.7	87.6	92.1	94.2	No
Cul1	2.52	-0.13	0.06	0.37	1.27293e-09	0.298553	0.143903	91.4	85.8	89.6	57.7	No
Lars2	4.45	-0.03	0.06	-0.64	0.149239	0.18964	0.0143843	98	96.3	97.3	55.8	No
Smc6	1.32	0.15	0.06	0.19	2.68735e-06	0.484194	0.567606	65.3	65.8	70	26.9	No
Slc12a2	0.87	0.14	0.06	0.03	0.00158126	0.605086	0.937921	49.1	49.1	52.8	15.4	No
Nub1	0.98	-0.14	0.06	0.61	6.16259e-05	0.514373	0.0704665	62.9	56	61.5	30.8	No
Sec61a1	0.76	0.15	0.06	0.04	7.19442e-05	0.539105	0.923204	51.6	51.1	58.2	9.6	No
Tmem106c	1.17	0.14	0.06	-0.14	6.15052e-06	0.438273	0.676185	68.3	67	71	25	No
Trim26	0.71	-0.23	0.06	1.38	1.57685e-08	0.616384	5.24689e-05	50.7	42.4	47.2	32.7	No
Mrpl36	0.81	0.22	0.06	-0.21	1.01079e-10	0.507625	0.537995	54.5	55.6	61.4	9.6	No
Mrpl17	1.09	0.23	0.06	0.09	1.15768e-14	0.442779	0.791926	64.1	66.2	70.8	28.8	No
Acaa1a	1.45	0.09	0.06	-0.01	0.000841614	0.378616	0.971765	77.1	74.6	78.9	32.7	No
Chd7	7.67	0.12	0.06	-0.52	1.40387e-12	0.150328	0.0105558	99.4	98.9	99.5	75	No
Nsmce1	0.69	0.44	0.06	0	8.88708e-33	0.537904	0.997855	44.4	52.4	55.7	9.6	No
Tmem160	1.56	0.11	0.06	-1.01	2.5708e-05	0.360469	0.00258072	78.5	77.1	80.9	11.5	No
Fkbp1a	1.73	0.32	0.06	-0.8	8.80496e-38	0.343092	0.0165797	78.5	80.9	83.9	26.9	No
Paip1	1.72	-0.11	0.06	0.23	2.1707e-05	0.38367	0.439974	81.8	75.8	80.9	38.5	No
Gm26887	1.09	1.05	0.06	-1.09	1.2663e-104	0.659737	0.0152249	35.1	52.7	59	3.8	No
Wdr83os	1.41	0.32	0.06	-0.6	1.01661e-34	0.372662	0.0697861	73	76	80.6	21.2	No
Canx	4.7	0.02	0.06	-0.85	0.373214	0.164677	0.00134783	97.8	97	98.1	53.8	No
Psma3	3.22	0.1	0.06	0.25	4.18505e-08	0.200831	0.245786	94.3	93.5	95.7	67.3	No
Selenow	8.56	0.13	0.06	-1.11	4.8379e-21	0.0684057	3.75371e-08	99.2	99.3	99.8	67.3	No
Gcc2	1.45	0.01	0.06	0.75	0.885447	0.485668	0.014193	70.9	66.8	71.8	42.3	No
Cir1	1.56	0.21	0.06	0.22	4.43997e-15	0.417626	0.465553	74.5	75.3	80.1	34.6	No
Gng11	1.46	0.4	0.06	-1.32	2.79904e-37	0.48717	0.000217484	67	71	76.5	3.8	No
Psmb7	1.5	0.07	0.06	-0.16	0.0108543	0.387492	0.614533	77.8	75.5	78.4	28.8	No
Arf1	2.69	0.18	0.06	-0.44	5.46194e-19	0.254508	0.133928	91.2	90.8	92.4	38.5	No
Aebp2	1.07	0.16	0.06	0.13	1.13018e-06	0.5149	0.699956	61.6	61.5	67	26.9	Yes
Ptprm	1.45	0.3	0.06	-0.6	1.04823e-12	0.626843	0.149686	56.1	57.7	64.7	13.5	No
Slc3a2	4.44	0.34	0.06	-2.06	5.60184e-66	0.254021	3.92002e-11	96.2	96	97.2	23.1	No
Idh3b	1.33	0.28	0.06	-0.22	7.39706e-25	0.413487	0.502775	71.1	73.2	77.6	30.8	No
Nae1	1.01	-0.11	0.06	0.7	0.0011997	0.521649	0.0302996	64.7	58.6	60.7	32.7	No
Dnajc10	0.86	0.11	0.06	0.21	0.00628796	0.57717	0.551705	54.2	52.4	56.2	17.3	No
Ccar1	2.38	0.15	0.06	0.6	1.74431e-10	0.359769	0.0139676	86.2	84.8	88.3	61.5	No
mt-Nd4	53.61	0.02	0.06	-0.56	0.105103	0.0113189	1.02418e-09	100	100	100	96.2	No
Ptpn1	1.05	0.29	0.06	0.42	1.87482e-18	0.525613	0.211538	59.7	62.3	65.5	32.7	No
Rp9	1.38	0.21	0.06	-0.57	1.85761e-13	0.461023	0.0966485	70.1	70.8	76.2	19.2	No
Polr1d	2.73	0.17	0.06	-1.02	8.61133e-18	0.239701	0.00124857	91.7	92.1	94.3	30.8	No
Ice1	0.87	0	0.06	0.88	0.933844	0.562561	0.00822958	57.5	54	56.8	32.7	No
Rbm42	0.93	0.31	0.06	-0.02	1.53013e-21	0.505812	0.956748	57.1	61.4	65.8	23.1	No
Ppp1r11	1.29	0.16	0.06	-0.4	1.48396e-08	0.440632	0.230322	72.1	71	74.4	19.2	No
Hspd1	1.59	0.25	0.06	-0.49	2.01801e-20	0.429374	0.147292	74.9	75.8	81.5	26.9	No
Pet100	1.36	0.51	0.06	-0.88	1.01236e-75	0.429987	0.00989483	66.4	75.1	78.4	15.4	No
Eif3i	1.69	0.29	0.06	-0.47	6.56621e-32	0.372046	0.150928	78.3	80.8	85.6	32.7	No
Ilrun	1.07	-0.11	0.06	0.13	0.0012371	0.525613	0.704857	66.1	59.8	64.2	25	No
Slc35d1	0.83	-0.22	0.06	-0.3	1.03507e-07	0.641657	0.417153	54.9	45.1	46.8	1.9	No
Qser1	1.21	-0.09	0.06	0.35	0.00528419	0.52895	0.298308	67.8	63	66.1	28.8	No
Tiprl	0.91	0.08	0.06	0.26	0.0204236	0.529326	0.420098	60.9	57.8	62	23.1	No
Prr5l	1.86	0.47	0.06	-1.63	3.95933e-49	0.526241	6.29893e-06	69.4	73.9	79.5	5.8	No
Zmym5	1.58	-0.07	0.06	0.75	0.0119403	0.480252	0.00864937	77.6	71.5	77.3	48.1	No
Pdcd11	0.73	0.22	0.06	-0.01	5.09236e-09	0.605261	0.974049	48.7	49.9	56.3	9.6	No
Arpp19	1.98	0.1	0.06	-0.43	8.92511e-06	0.345933	0.175681	85.4	84.7	88.2	32.7	No
Stoml2	0.72	0.32	0.06	0.39	5.65923e-19	0.577115	0.23994	49.3	52.5	58.2	23.1	No
Abhd14a	0.86	0.32	0.06	0.71	8.26839e-21	0.548322	0.0276365	54.8	58.2	64.4	28.8	No
Opa1	1.21	-0.11	0.06	-0.04	0.00126166	0.544134	0.921433	68	62.4	66.7	21.2	No
Smndc1	0.7	0.15	0.06	0.34	0.000177139	0.616716	0.332799	48.4	47.4	52.4	19.2	No
Clns1a	0.71	0.16	0.06	0.42	3.50483e-05	0.602064	0.222176	49.4	50.4	54.6	19.2	No
Cnnm3	0.69	0.09	0.06	0.42	0.0391868	0.624119	0.22684	48.2	47.5	52.1	13.5	No
Fkbp4	1.74	0.03	0.06	-0.73	0.297035	0.422781	0.0288976	82.2	78	79.8	21.2	No
Mrps14	2.25	0.19	0.05	-0.49	1.04385e-20	0.314097	0.111573	88.7	89.1	91.5	38.5	No
Nbea	4.55	0.03	0.05	1.65	0.313301	0.374166	1.54051e-25	94.6	92.7	96.5	94.2	No
mt-Nd5	11.82	-0.08	0.05	-0.23	1.50632e-11	0.0579791	0.111176	99.6	99.5	100	80.8	No
Usp19	1.13	0.06	0.05	0.41	0.0489492	0.517276	0.204856	67.6	65.2	68	32.7	No
Enpp5	1.21	-0.13	0.05	-0.63	9.55359e-06	0.507504	0.0620424	72.7	66.5	69.6	9.6	No
Uggt1	0.78	-0.01	0.05	0.77	0.748119	0.629824	0.0277986	52.1	49.1	52.5	28.8	No
Cenpb	0.97	0.23	0.05	-0.11	3.85585e-13	0.536936	0.743299	60.4	61.5	64.7	21.2	No
Mrps16	0.86	0.23	0.05	0.06	1.12027e-12	0.554306	0.857053	57.6	59	61.4	17.3	No
Arpc2	2.98	0.17	0.05	-1.31	2.29e-17	0.313687	3.58761e-05	92.1	91.4	94	28.8	No
Trim28	0.66	0.24	0.05	0.36	4.55429e-10	0.618952	0.287109	47	48.5	53.6	17.3	No
Mrpl52	2.4	0.37	0.05	-1.15	6.49023e-66	0.348266	0.000382554	86.5	90.5	93.2	26.9	No
Bdp1	1.1	-0.01	0.05	0.7	0.815553	0.601668	0.0388092	61.7	59.1	60.6	36.5	No
Ddt	2.77	0.14	0.05	-1.18	8.29287e-11	0.347134	0.000255098	91.3	90.8	92.9	21.2	No
Emsy	1.25	0.02	0.05	1.02	0.514115	0.563572	0.000405714	67.2	64.1	69.4	40.4	No
Hspa8	10.06	0.25	0.05	-1.49	1.89059e-60	0.198683	2.38563e-12	99.5	99.5	100	67.3	No
Ddhd1	1.04	0.05	0.05	3.28	0.224158	0.627042	9.70611e-64	57.6	54.6	60.6	86.5	No
Zcchc8	0.86	-0.03	0.05	1.08	0.516906	0.623881	0.000859252	56.2	52.3	55.8	40.4	No
Pafah1b2	1.88	-0.21	0.05	0.03	2.23492e-18	0.443998	0.932781	85.9	79.7	79.5	30.8	No
Sf3b1	3.15	0.19	0.05	-0.3	2.42529e-20	0.33441	0.256617	92.9	92.8	94	53.8	No
Plekha7	3.99	0.16	0.05	-0.37	5.86581e-12	0.426902	0.17622	92.1	92	91.8	46.2	No
Ube2w	1.59	0.09	0.05	0.35	0.0028676	0.513812	0.25651	75	73.6	75.6	42.3	No
Zfp386	0.68	0.06	0.05	1.22	0.180332	0.645423	0.000175899	49	46.4	52.1	32.7	Yes
Arhgap5	6.42	-0.1	0.05	0.47	3.9253e-10	0.22989	0.00505817	99.2	98.5	98.3	84.6	No
Caprin1	1.97	-0.06	0.05	-0.07	0.024394	0.470679	0.814125	83.6	79.8	83.1	42.3	No
Rps27l	3.38	0.71	0.05	-1.23	1.40675e-207	0.404693	0.000109187	89.3	93.9	95.4	36.5	No
Arpc4	0.84	0.38	0.05	0.1	8.53801e-28	0.591551	0.768078	53	58	60.4	19.2	No
Eprs	2.14	0.12	0.05	-0.15	2.9167e-06	0.452418	0.626569	84	81.7	84.5	44.2	No
Sec61b	2.39	0.28	0.05	-0.91	2.9345e-41	0.357042	0.00482097	88.6	89.6	89.9	36.5	No
Ube3a	3.36	-0.13	0.05	0.09	1.21459e-11	0.344102	0.722902	95.4	91.8	94	59.6	No
Gm17167	1.11	-1.82	0.05	0.36	0	0.740344	0.379801	69.2	27.8	34.7	3.8	No
Tceal3	1.52	0.03	0.05	-1.04	0.324371	0.502669	0.00231546	77	72.3	79.5	9.6	No
Acat1	0.98	0.08	0.05	0.19	0.0257043	0.615925	0.592411	59.1	57	61	21.2	No
Med13	2.8	-0.05	0.05	0.67	0.0429589	0.400277	0.00268461	91.2	87.7	90.5	73.1	No
Naxe	1.25	0.08	0.05	-0.17	0.00688314	0.50551	0.604686	72.4	70.4	75.6	17.3	No
Ago2	1.09	0.12	0.05	0.38	0.000346059	0.587332	0.254121	62.8	61.9	68.5	32.7	No
Zranb1	2.06	-0.01	0.05	0.89	0.638992	0.471396	0.000150516	84.5	80.8	85.5	59.6	No
Paics	1.29	0.24	0.05	-0.71	3.14904e-17	0.519834	0.0369967	69	71.1	74	11.5	No
Luzp1	1.51	0.21	0.05	-0.32	1.12218e-09	0.620775	0.374875	64.7	66.3	69.9	30.8	No
Riok3	1.21	0.03	0.05	1.34	0.4286	0.57677	7.73921e-08	68.2	64.9	66.9	61.5	No
Dcaf11	0.67	-0.03	0.05	0.79	0.500109	0.661812	0.0208474	50.7	45.9	49.4	21.2	No
Mrps5	0.88	0.18	0.05	0.33	9.71208e-08	0.608396	0.31632	57.6	57.6	60.6	21.2	No
Txn1	2.73	0.29	0.05	-0.96	8.81707e-46	0.369927	0.00270114	90.3	92.3	92.7	32.7	No
Rsbn1l	2.41	0.03	0.05	0.53	0.185537	0.440632	0.0299481	88.5	85.5	90.1	61.5	No
Ikzf2	1.97	-0.12	0.05	0.35	0.000370403	0.605123	0.275135	76.5	69.5	75.2	34.6	Yes
Dync2li1	0.62	0.45	0.05	0.51	1.67467e-29	0.665253	0.140409	40.6	47.6	50.8	17.3	No
Adamts5	7.37	0.12	0.05	-2.94	8.48371e-08	0.42466	6.29527e-20	98.3	96.7	97.3	11.5	No
Plekhj1	0.8	0.22	0.05	0.07	5.49719e-10	0.625391	0.834578	53.6	54.7	61.5	17.3	No
Psma5	1.66	0.08	0.05	-0.57	0.00153922	0.478512	0.0853456	80.5	79.2	85.5	26.9	No
Rpl10	10.43	0.4	0.05	-1.8	1.04815e-138	0.275037	2.89499e-15	98.9	99.2	99.8	46.2	No
Rab5c	1.55	-0.06	0.05	-0.09	0.0194313	0.507504	0.788249	80.4	74.7	78.4	34.6	No
Ubr7	0.68	-0.19	0.05	0.39	2.06918e-06	0.695335	0.278269	51.3	43.1	47.9	15.4	No
Sars	1.71	0.14	0.05	-0.17	1.39375e-08	0.497139	0.595864	79.2	77.9	82.5	38.5	No
Fibp	0.83	0.12	0.05	0.27	0.000449598	0.630248	0.407339	56.2	55.2	59.9	21.2	No
Mapk3	1.46	0.31	0.05	-0.69	1.74157e-32	0.506569	0.0399561	72.8	76.5	79.7	21.2	No
Hadhb	0.78	0.23	0.05	0.59	1.62049e-10	0.638075	0.0792862	52.5	54	59.8	23.1	No
Dym	1.18	-0.14	0.05	1.38	0.000140384	0.661052	2.24576e-06	62.9	57.7	63.6	48.1	No
Secisbp2l	1.64	-0.46	0.05	-0.5	3.02592e-70	0.562345	0.141543	83.6	69.5	74.3	19.2	No
Vkorc1l1	0.75	0.16	0.05	0.78	0.000409362	0.711106	0.0385918	45.9	46.1	52.7	25	No
Ndufa13	6.15	0.11	0.05	-1.16	1.45397e-16	0.184134	1.08497e-06	98.8	98.9	99.8	57.7	No
Srp14	2.96	0.26	0.05	-1.36	3.10382e-44	0.334437	1.21515e-05	92.7	94	94.8	25	No
Sf3b3	0.79	0.08	0.05	0.21	0.038799	0.662027	0.536328	53.1	51.6	56.3	21.2	No
Psma4	2.18	0.01	0.05	-0.89	0.584594	0.432524	0.0067062	88.2	86	90.1	30.8	No
Tpr	3.54	0.07	0.05	0.1	0.00128143	0.407765	0.670193	93.4	92.4	95.9	55.8	No
Adamts3	0.71	0.02	0.05	3.5	0.714855	0.808445	3.00381e-21	33.4	32.5	39.3	75	No
Smdt1	5.66	-0.01	0.05	-0.97	0.460234	0.241222	7.25908e-05	97.9	98.2	99.4	53.8	No
Polr2l	1.91	0.43	0.05	-1.31	9.29039e-63	0.512833	0.000102675	79.1	82.2	83.9	15.4	No
Cops3	1.07	0.11	0.05	0.64	0.000529311	0.616275	0.0455834	62.8	62.4	67.4	34.6	No
Mrps24	1.46	0.22	0.05	-0.54	9.80822e-18	0.506749	0.099358	76.3	77.3	79.3	25	No
Pex3	0.73	0.12	0.05	1.19	0.003715	0.688152	0.000295812	49.2	48.1	53	42.3	No
Iscu	1.21	0.29	0.05	-0.18	7.67559e-25	0.566697	0.589201	66.8	69.9	74	21.2	No
Qrich1	1.14	0	0.05	0.99	0.985144	0.643869	0.00143778	63.9	59.8	66.4	44.2	No
Tbca	2.36	0.23	0.05	-0.87	4.01742e-30	0.416122	0.00695874	88.1	89.4	92.9	23.1	No
Drosha	1.1	-0.14	0.05	0.16	6.0075e-06	0.630248	0.642645	67.5	60.8	63.9	21.2	No
Csrp2	1.76	0.61	0.05	-1.62	1.67012e-121	0.513758	6.45962e-07	73.6	82.4	85.6	3.8	No
mt-Nd4l	7.85	-0.01	0.05	-0.83	0.476738	0.231738	3.90234e-05	99.3	97.9	99.1	59.6	No
Frg1	1.18	0.22	0.05	0.17	1.38412e-13	0.602064	0.599451	65.5	67.6	73.2	19.2	No
Bod1l	2.29	-0.12	0.05	0.67	4.02063e-06	0.528694	0.00822471	85.6	81.7	83.6	51.9	No
Drap1	2.87	0.21	0.05	-1.26	6.77182e-27	0.398757	6.53452e-05	92.6	92	93.7	26.9	No
Celf4	3.88	-0.1	0.04	-0.72	0.000252605	0.59321	0.0273145	89.7	85.5	88.6	40.4	No
Smu1	0.86	0.24	0.04	-0.04	1.41495e-12	0.651939	0.915328	54.7	57.9	62	11.5	No
Ppp2r5e	2.03	-0.02	0.04	1.27	0.478577	0.554919	8.52142e-10	83	79.2	80.3	73.1	No
Pdhb	1.05	0.11	0.04	0.47	0.00089935	0.620551	0.141689	65	63.8	68.1	36.5	No
Nceh1	0.71	0.22	0.04	0.55	1.2175e-07	0.721335	0.135632	45.5	47.1	52.7	23.1	No
Ankrd13c	1.29	-0.09	0.04	0.18	0.00859235	0.643689	0.586055	69.6	63.9	68.3	28.8	No
Atp6v1f	3.38	0.2	0.04	-1.64	1.85808e-31	0.363013	8.53e-08	94.8	95.6	97	28.8	No
Ipo11	0.79	-0.11	0.04	0.47	0.00954849	0.742453	0.221552	50.5	45.2	49.7	13.5	No
Rnf169	2.06	0.17	0.04	0.18	3.19253e-08	0.641696	0.579541	75.9	74.2	76.7	36.5	No
H2-Q6	1.12	-0.7	0.04	-0.47	2.89947e-87	0.722012	0.206724	69.2	49.4	50.8	1.9	No
Junb	15.69	1.44	0.04	-2.62	0	0.614299	4.80466e-21	86	96.7	96.4	32.7	Yes
Rexo2	0.99	0.15	0.04	-0.07	1.33494e-06	0.642367	0.838177	63.2	62.2	65.8	23.1	No
Spcs1	2.18	0.21	0.04	-0.9	1.90219e-22	0.475581	0.00565279	87.7	88.3	89.1	28.8	No
H2afz	4.34	0.19	0.04	-0.72	4.14339e-26	0.404356	0.00688902	96.9	96.9	96.5	48.1	No
Echs1	0.91	0.2	0.04	-0.22	1.51613e-09	0.662801	0.511764	58.4	59.2	61.7	13.5	No
Akap8	0.9	-0.1	0.04	1.05	0.00346253	0.684587	0.000824655	60.7	55.5	59.1	40.4	No
Magoh	1.05	0.31	0.04	-0.07	9.95264e-24	0.634239	0.83896	63.4	66.3	69.1	26.9	No
Ahsa1	0.88	0.11	0.04	-0.09	0.00116044	0.662027	0.799002	59.3	59.5	64.2	13.5	No
Nme1	1.99	0.28	0.04	-0.54	5.12363e-35	0.513041	0.0891687	83.9	85.4	88.5	34.6	No
Map1lc3a	2.31	0.14	0.04	-0.7	5.31713e-10	0.506569	0.028612	88.3	86.8	89.9	34.6	No
Tmem260	0.85	-0.08	0.04	1.04	0.0912653	0.762112	0.00660752	49.2	45	50.6	36.5	No
Sbf2	3.4	0.16	0.04	0.64	2.24513e-11	0.536062	0.00406528	91	88.4	91.2	67.3	No
Eif4e	1.27	0.12	0.04	0.19	7.37195e-05	0.623546	0.557154	70.6	69.7	72.1	28.8	No
Mgst1	1.7	0.55	0.04	-1.6	1.30307e-88	0.597073	1.45066e-06	70.1	79.2	82.6	1.9	No
Ass1	2.07	0.76	0.04	-1.67	4.37674e-158	0.61005	1.18243e-06	73	81.9	84.5	7.7	No
Elk3	0.73	0.41	0.04	-0.01	1.61854e-23	0.742246	0.976742	43.4	48	50.5	13.5	Yes
Hdgfl2	0.78	-0.08	0.04	0.59	0.03761	0.717123	0.0891737	55.4	49.4	55.4	26.9	No
Arid4a	2.05	-0.08	0.04	0.15	0.00864559	0.618716	0.634521	81.5	76.5	82.3	48.1	Yes
Smad3	1.17	0.52	0.04	-0.98	1.35404e-36	0.745187	0.0170486	51.5	57.5	60.4	3.8	Yes
Pdia6	2.17	0.21	0.04	-1	1.56118e-20	0.533987	0.00270439	86.4	85.4	88.6	23.1	No
Plxdc2	2.09	0.66	0.04	-1.29	7.73669e-76	0.711963	0.00114385	60	72.6	77.1	13.5	No
Hdgf	2.92	0.25	0.04	-0.81	8.1553e-33	0.488995	0.00966382	90.5	91.5	92.9	38.5	No
Mpc2	3.39	0.08	0.04	-0.74	2.62836e-06	0.397709	0.0102879	95.4	94.5	95.9	51.9	No
Wdpcp	1.32	0.02	0.04	1.23	0.7693	0.791279	0.00183147	49.9	48.9	53.6	42.3	No
Srpk2	3.49	-0.04	0.04	1	0.112174	0.499628	3.00341e-08	94.3	91.6	94.5	73.1	No
Gbf1	2.82	-0.04	0.04	1.47	0.0939433	0.578751	1.37057e-15	89	84.9	88.3	80.8	No
Aprt	0.98	0.47	0.04	-0.45	8.96811e-52	0.652948	0.186335	57.6	65	69.1	11.5	No
Ube2d3	2.68	0.1	0.04	0.07	4.30811e-06	0.500009	0.794691	91.1	90.5	92.4	50	No
Eftud2	0.83	0.24	0.04	0.7	6.13521e-10	0.728791	0.0443103	50.8	52.1	57.3	30.8	No
Fam98b	1.12	0.13	0.04	-0.03	2.07158e-05	0.645423	0.939026	68	66	68.9	23.1	No
2900097C17Rik	2.14	0.02	0.04	-0.92	0.546753	0.547183	0.00585306	86.7	83.8	86.9	23.1	No
Ago1	0.68	-0.08	0.04	0.57	0.0467346	0.746386	0.109596	50.2	45.2	49.8	21.2	No
Ptov1	3.39	0.22	0.04	-1.38	1.07818e-32	0.441959	7.78879e-06	94.4	95	95.7	32.7	No
Scoc	1.26	-0.14	0.04	0.08	1.5108e-06	0.644408	0.806128	73.9	67.3	71.6	30.8	No
Fbxw2	0.91	0.12	0.04	-0.02	0.00118905	0.706984	0.961625	57.2	56.7	60.3	13.5	No
Pim1	0.92	1.06	0.04	-0.68	7.5018e-115	0.779978	0.109371	38.9	51.2	54.7	5.8	No
Zrsr2	0.78	0.1	0.04	0.25	0.00934962	0.727728	0.457309	51.8	51.9	56.6	19.2	No
Sf3b6	2.8	0.16	0.04	-0.92	2.8323e-17	0.470924	0.00334993	93.3	92.6	94.3	38.5	No
Tnks2	2.71	-0.05	0.04	0.62	0.0659699	0.55772	0.00822578	90.8	87.3	88.8	59.6	No
Ubc	10.43	0.31	0.04	-1.37	3.81603e-75	0.424251	7.53462e-11	99.3	99.5	99.7	69.2	No
Taok2	0.73	0.05	0.04	0.7	0.224394	0.728916	0.0385389	51.9	49.5	54.1	28.8	No
Taok1	3.43	-0.1	0.04	-0.24	2.24468e-07	0.501972	0.358252	94.7	91.6	93.7	50	No
Spast	1.01	-0.17	0.04	1.02	4.4097e-06	0.733899	0.00216766	61.4	53.5	56	40.4	No
Hdlbp	2.11	-0.06	0.04	-0.42	0.0149211	0.599069	0.200567	85.5	81.1	84.2	34.6	No
Irf1	1.99	-0.73	0.04	-1.14	4.02777e-60	0.798923	0.0127286	69.3	54.6	54.7	7.7	Yes
Pdk2	1.03	0.25	0.04	-0.2	1.42519e-15	0.681502	0.546737	60	63	66.1	13.5	No
Banf1	0.87	0.35	0.04	-0.03	5.02766e-25	0.69964	0.930635	54.8	58.2	62.9	17.3	No
Rarres2	1.56	0.31	0.04	-1.37	1.27823e-14	0.757294	0.000858834	59.8	60.4	67.2	3.8	No
Gon4l	1.79	-0.11	0.04	0.17	5.79506e-05	0.62631	0.586561	82.2	76.2	79.5	42.3	Yes
Ncbp2	0.99	0.06	0.04	0.76	0.0607208	0.684916	0.015597	62.8	61.1	65.5	40.4	No
Srsf1	1.9	-0.01	0.04	0.77	0.792902	0.58364	0.00160676	84.6	81.7	81.9	61.5	No
Egln1	1.47	-0.1	0.04	0.09	0.000433179	0.630752	0.780139	77.7	72.1	78.4	32.7	No
Pias1	2.93	-0.08	0.04	1.33	0.000110995	0.544775	4.12483e-15	92.3	89.1	92.4	88.5	Yes
Eif3b	0.76	0.15	0.04	0.2	3.01139e-05	0.727578	0.561872	53.6	51.7	55.2	15.4	No
Nipbl	7.35	0.05	0.04	0.28	0.00186523	0.399764	0.0912962	99.4	99	99.2	84.6	No
Mtch2	1.06	0.07	0.04	0.26	0.0493366	0.681452	0.42687	66.7	62.7	68.3	25	No
Sel1l	1.55	-0.12	0.04	-0.26	7.17448e-06	0.648413	0.426247	79	72.2	77.1	26.9	No
Pdxdc1	1.49	0.08	0.04	-0.03	0.0147151	0.676117	0.928108	72.2	69.9	72.9	32.7	No
Tardbp	1.79	-0.09	0.04	0.35	0.000237261	0.61662	0.225032	83.7	77.5	81.1	53.8	No
Cdk5rap2	1.26	-0.15	0.04	0.21	2.51121e-06	0.711466	0.545987	68.8	62.3	68.8	30.8	No
Wdr61	1.45	0.25	0.04	-0.06	6.20946e-21	0.629505	0.855197	72.8	75.9	78.9	26.9	No
Nasp	0.77	0.19	0.04	0.18	4.46033e-06	0.765437	0.625936	47.6	48.4	52.8	13.5	No
Thap12	1.56	-0.07	0.04	-0.5	0.0157718	0.629482	0.137688	78.9	74.1	77.6	26.9	Yes
Mbtps1	0.92	0.12	0.04	0.6	0.000598116	0.714141	0.0680232	58.3	58.2	61.7	34.6	No
Pten	3.14	0.01	0.04	0.79	0.608386	0.521173	4.36327e-05	94	91.6	94	84.6	No
Pdrg1	0.99	0.47	0.04	-0.27	1.3547e-49	0.690927	0.419129	57.1	63.9	69.4	19.2	No
Cbx4	1.02	0.47	0.04	-0.52	2.70533e-33	0.761459	0.182104	51.7	56.6	59.8	13.5	No
Tsen34	1.2	0.58	0.04	-0.71	6.77515e-86	0.658078	0.0378738	61.3	71.7	74.8	11.5	No
Irf2bp1	0.64	0.2	0.04	0.58	4.02592e-07	0.756898	0.0889772	45.8	46.5	50.2	21.2	No
Bhlhe40	1.63	0.71	0.04	-1.24	1.83174e-60	0.789547	0.00462797	57.1	59.9	62.9	7.7	Yes
Rps6kb1	1.42	-0.04	0.04	0.71	0.275163	0.684439	0.0188044	73.1	68.8	73.3	59.6	No
Ppia	13.28	0.22	0.04	-1.81	1.37253e-68	0.311443	9.38411e-20	99.4	99.8	100	61.5	No
Os9	1.85	0.05	0.04	-0.44	0.0354683	0.609443	0.177514	83	80.7	81.5	26.9	No
Alkbh7	0.63	0.1	0.04	0.46	0.0132652	0.754492	0.174794	47.7	47.3	51.3	15.4	No
Cp	35.15	0.17	0.04	-3.45	2.59101e-31	0.398633	1.39392e-54	100	99.9	100	32.7	No
Cnih4	1.52	0.06	0.04	-0.38	0.0277798	0.624403	0.247266	79.6	76.5	80.8	25	No
Cnbp	3.82	0.08	0.04	-0.46	2.71015e-05	0.471784	0.0755691	96.4	96.3	97.9	53.8	Yes
Fgfr1op2	1.35	0.1	0.04	-0.01	0.000610973	0.676662	0.968025	71.1	69.9	72.2	32.7	No
Ppard	0.9	-0.08	0.04	0.89	0.055751	0.769087	0.0128782	55.4	50.3	53.8	38.5	Yes
Psmb9	1.94	-1.29	0.04	-0.88	0	0.728791	0.015667	87.1	62.5	64.7	3.8	No
Rap1b	1.31	0.17	0.04	0.17	1.56594e-09	0.67162	0.595368	71.7	69.6	74.3	36.5	No
Pomp	4.06	-0.04	0.04	-1.22	0.0335776	0.472533	4.2188e-05	96.7	95.8	96.7	34.6	No
Psmb2	2.31	0.11	0.03	-0.22	7.78176e-07	0.563632	0.432318	88.7	88.6	92.1	38.5	No
Rsbn1	1.76	-0.07	0.03	0.2	0.0149485	0.662801	0.507203	81.2	76.1	78.7	44.2	No
Herc4	1.34	-0.02	0.03	1.02	0.595788	0.737176	0.000774213	66.7	63.4	68	38.5	No
Kiz	1.24	-0.02	0.03	0.91	0.667256	0.76111	0.00733476	62.6	58.6	63.6	44.2	No
Krtcap2	2.48	0.19	0.03	-0.91	4.55785e-21	0.548022	0.00450633	89.7	90.3	92.6	26.9	No
Gm10076	5.96	0.24	0.03	-1.39	5.40135e-49	0.464471	1.21887e-07	97.8	97.9	99.4	44.2	No
Cdipt	0.71	0.11	0.03	0.41	0.00328795	0.763868	0.237414	50.3	49.2	53.6	21.2	No
Cask	1.8	-0.01	0.03	0.82	0.770013	0.735787	0.00659261	72.8	69	72.9	55.8	No
Ipo7	0.83	-0.01	0.03	0.84	0.763012	0.768043	0.0151854	56.5	50.3	54.1	28.8	No
Cox14	2.39	0.25	0.03	-1.15	1.74404e-35	0.557807	0.000345592	88.5	89.8	93.1	26.9	No
Cc2d2a	1.68	-0.08	0.03	0.93	0.00918236	0.700664	0.000621909	77.4	71.5	75.9	55.8	No
Gtf2ird1	0.79	-0.17	0.03	1.91	2.63072e-05	0.790683	5.9648e-12	53.6	46.4	50.8	57.7	Yes
Kmt2a	5.68	-0.1	0.03	0.98	5.2343e-10	0.497977	1.50074e-11	98.9	97.8	97.9	84.6	No
Morn2	0.95	0.38	0.03	-0.47	1.5107e-30	0.737463	0.175638	55.8	61	62.9	9.6	No
Ephx1	0.89	1.23	0.03	-0.47	1.36529e-154	0.810506	0.260011	33	53.3	56.3	5.8	No
Phpt1	1.36	0.5	0.03	-0.7	2.00175e-75	0.670622	0.0373565	67	75.6	77.9	17.3	No
Pfn1	2.25	0.27	0.03	-1.19	9.54443e-35	0.615513	0.000297921	86.2	87.3	89.1	19.2	No
Puf60	1.23	0.25	0.03	-0.01	1.68398e-18	0.7001	0.984597	68.3	69.6	73.7	25	No
Dhx36	2.68	-0.05	0.03	0.44	0.0335995	0.596499	0.0580701	92	89.8	90.9	57.7	No
Echdc1	0.9	-0.23	0.03	-0.04	1.01819e-10	0.784677	0.919678	60.4	50.6	52.8	11.5	No
Bicra	1.31	-0.13	0.03	-0.63	7.04982e-05	0.755444	0.0857924	68.5	62.7	63.9	9.6	No
Hnrnpul2	1.61	-0.19	0.03	0.03	5.19676e-14	0.692712	0.924598	80.3	73.4	74.6	38.5	No
Ahr	0.67	-0.07	0.03	2.34	0.158898	0.822393	2.54976e-16	46.4	40	45.3	53.8	Yes
5730455P16Rik	0.76	-0.1	0.03	0.64	0.0159555	0.798923	0.0746823	52.4	46.9	50.3	23.1	No
Tsen15	0.72	0.19	0.03	0.12	1.20554e-07	0.775139	0.724609	50.7	51.5	54.7	13.5	No
Aimp1	1.52	0.26	0.03	-0.31	9.59693e-22	0.691889	0.336995	73.8	76.9	78.7	32.7	No
Ppp2r1a	1.55	0.13	0.03	-0.58	3.22067e-07	0.681452	0.0811124	77.9	76.3	77.8	25	No
Nedd4	9.72	0.03	0.03	-1	0.0230095	0.403777	1.17656e-07	99.8	99.7	99.5	73.1	No
Dis3l2	2.08	-0.04	0.03	1.16	0.241881	0.743338	4.5451e-06	75.9	72.9	75.6	59.6	No
Vps36	1.03	0.25	0.03	0.65	1.65878e-13	0.766154	0.0519066	59.4	59.8	65.1	44.2	No
Ptbp1	1.03	0.13	0.03	-0.26	0.000110646	0.753444	0.43403	63	61.6	65.8	9.6	No
Scap	0.74	-0.12	0.03	0.34	0.00213183	0.798865	0.324483	54.3	47.9	51.3	17.3	No
Dctn4	1.71	0.09	0.03	0.33	0.00114869	0.69964	0.27023	79	77.3	79.7	50	No
Gm41804	0.31	-0.11	0.03	5.15	0.203893	0.907965	4.2908e-27	20.5	15.5	18.1	88.5	No
Ptma	21.94	0.28	0.03	-1.4	5.01023e-115	0.386118	1.51739e-21	99.7	100	100	84.6	No
Stat3	3.38	0.33	0.03	-0.7	8.92296e-40	0.688533	0.0251901	88.3	88.1	91.6	44.2	Yes
Fus	4.35	0.11	0.03	0.02	2.17583e-11	0.536898	0.927064	97.9	97	97.3	73.1	No
Psma6	1.62	0.21	0.03	-0.61	1.63239e-17	0.680548	0.0646716	77.8	79.6	82.8	26.9	No
Prnp	4.79	0.21	0.03	-0.92	3.34787e-33	0.560407	0.00051813	97.8	96.9	98.1	55.8	No
Atox1	2.84	0.23	0.03	-1.13	1.24055e-32	0.594298	0.000348417	91.3	92.5	94	30.8	No
Spcs2	3.57	0.12	0.03	-0.54	1.59038e-12	0.540977	0.0439302	96.6	95.8	96.5	51.9	No
Lyrm2	0.73	0.17	0.03	0.67	4.02063e-06	0.78942	0.0435717	51.2	50.8	55.2	26.9	No
Nr3c2	4.6	-0.2	0.03	-0.04	6.24708e-13	0.732398	0.878221	91.3	85.3	90.2	55.8	Yes
Ddx42	1.83	-0.1	0.03	0.12	6.16259e-05	0.701159	0.693135	83.9	78.8	80.4	48.1	No
Sod1	1.79	0.01	0.03	-1.03	0.757933	0.694786	0.00243626	81.2	78.8	84.9	11.5	No
Stub1	1.92	0.12	0.03	-0.45	7.92571e-08	0.666573	0.156628	84.5	83.9	86.4	36.5	No
Hspa5	3.83	0.16	0.03	-1.08	2.52872e-12	0.67187	0.000661031	94.1	92.2	95.9	36.5	No
Dnajc15	0.85	0.26	0.03	-0.03	2.71374e-13	0.789433	0.931531	53.6	56	59.5	15.4	No
Snrpa	0.71	0.24	0.03	0.58	6.58337e-11	0.798923	0.0869464	49.1	50.8	54.6	25	No
Smchd1	2.1	-0.01	0.03	1.12	0.773584	0.715057	2.36876e-07	83.2	79.8	84.5	63.5	No
Srrm2	7.54	-0.04	0.03	0.42	0.00788222	0.483569	0.00586582	99.7	99.3	99.7	94.2	No
Acin1	3.26	-0.01	0.03	0.65	0.720466	0.638443	0.00150169	94	91.5	92.7	76.9	No
Kmt2e	5.55	-0.09	0.03	0.06	4.73467e-07	0.578312	0.779329	98.5	97.9	97.9	73.1	No
Snx3	3.41	0.29	0.03	-0.81	1.70499e-57	0.598259	0.00558068	94	95.3	96.4	42.3	No
Eif3c	3.74	0.07	0.03	-0.33	0.000406507	0.612249	0.192297	96	95	95.7	46.2	No
Slk	1.34	-0.01	0.03	0.9	0.738559	0.778903	0.00262679	69	65.8	69.4	46.2	No
Tm9sf2	2.2	-0.09	0.03	-0.78	0.00012667	0.69058	0.018638	88.9	83.7	87.1	23.1	No
Mrps12	1.11	0.06	0.03	-0.22	0.0431034	0.755909	0.497249	69.4	66.7	70.2	19.2	No
Cfl1	4.86	0.42	0.03	-0.81	2.60887e-118	0.616	0.00148756	96.6	97.6	98.4	48.1	No
Raf1	1.34	-0.08	0.03	0.3	0.0111468	0.758506	0.345623	75.7	68.5	73.5	40.4	No
Phb	0.92	0.19	0.03	-0.39	3.22886e-09	0.785767	0.244072	59.6	60	64.8	7.7	Yes
Eef1b2	5.27	0.38	0.03	-1.85	2.55311e-106	0.596204	3.21656e-10	96.3	97.1	99.1	36.5	No
Hnrnpk	6.4	0.12	0.03	-0.67	9.32648e-16	0.52186	0.00194363	99	99.1	99.7	71.2	No
Bub3	0.86	0.23	0.03	0.52	5.31287e-12	0.798737	0.117065	56	57.4	61	34.6	No
Add1	2.75	-0.18	0.03	1.22	7.22286e-19	0.68859	1.05442e-11	93.3	87	90.4	80.8	No
Pkp4	3.16	0.28	0.03	-0.9	5.00439e-28	0.742453	0.00739953	86	86.6	89.9	34.6	No
Txndc16	1.43	-0.35	0.03	-0.2	3.073e-27	0.815614	0.581735	72.7	61	62.9	25	No
Jak1	2.34	0.06	0.03	-0.18	0.0130979	0.72433	0.551812	87	84.6	87.2	36.5	No
Eny2	1.39	0.12	0.03	0.01	1.12019e-05	0.75505	0.975822	74	73.3	75.6	26.9	No
Fat1	1.11	0.39	0.03	-0.8	1.02458e-29	0.812165	0.0293872	57.7	61.4	66.4	3.8	No
Uvrag	1.52	-0.12	0.03	1.22	8.57758e-05	0.79262	2.73769e-06	73.1	67.1	70.2	50	No
Bax	1.43	0.7	0.03	-0.49	7.06203e-104	0.792968	0.169151	65.8	71.3	74.6	21.2	No
St3gal1	1.52	-0.14	0.03	1.45	4.5416e-05	0.810639	2.1013e-08	71.4	64.9	69.7	57.7	No
Psmb10	1.77	-1.03	0.03	-0.9	7.031e-250	0.819028	0.0155574	82.7	63.1	68.9	3.8	No
Hnrnph2	1.66	0.11	0.03	-0.24	2.40275e-05	0.744098	0.452799	78.6	78.5	80.4	30.8	No
Ppp1r2	1.53	-0.06	0.03	-0.22	0.0248204	0.763901	0.504697	77.8	73.5	75.6	28.8	No
Srsf7	2.04	0.29	0.03	0.8	5.65546e-29	0.748318	0.00111237	81.6	83.1	87.2	69.2	No
Metap2	3.28	0.08	0.03	0.02	1.43185e-05	0.648413	0.933921	94.6	93.6	95.7	57.7	No
Triobp	0.67	0.29	0.02	-0.17	4.52731e-14	0.837298	0.621602	45.7	48.1	53.3	1.9	No
Cers2	0.64	0.15	0.02	0.33	0.00013274	0.835144	0.329247	47.8	47.2	52.2	13.5	No
Kmt2c	4.67	-0.13	0.02	1.04	4.00928e-12	0.669217	8.96933e-11	97.2	95.2	96.5	90.4	Yes
Dad1	3.76	0.13	0.02	-0.81	1.72447e-15	0.605261	0.00394773	97	95.9	97.3	51.9	No
Prdx5	4.3	0.01	0.02	-0.98	0.480052	0.62462	0.000516239	97.4	96.6	98.3	40.4	No
Snu13	2.2	0.08	0.02	-0.48	0.000548236	0.704575	0.125903	88.4	86.9	89.3	32.7	No
Napa	0.88	0.29	0.02	0.39	1.95565e-18	0.812829	0.237236	55.6	58.8	63.4	34.6	No
Actb	24.82	0.63	0.02	-2.38	0	0.60895	6.0296e-37	99.6	99.8	99.8	73.1	No
Ttll5	1	-0.06	0.02	2.12	0.169681	0.85576	6.07364e-15	54.3	50.7	55.8	63.5	No
Zfp704	1.72	-0.11	0.02	-1.33	0.00604419	0.845789	0.000907892	66.8	60.9	67.8	1.9	No
Ror1	5.52	-0.03	0.02	-2.38	0.258285	0.767889	1.79471e-12	92.6	90.4	93.4	15.4	No
Cenpx	0.96	0.3	0.02	-0.28	7.74043e-21	0.808988	0.397357	59.1	61.4	65.9	11.5	No
Pum1	3.31	0.05	0.02	-0.25	0.0308311	0.687692	0.338415	94.3	93.1	95.9	51.9	No
Ppdpf	1.64	0.14	0.02	-1.04	2.48676e-08	0.761459	0.0020897	78.4	77.3	80.4	11.5	No
Spidr	2.11	0.63	0.02	-0.63	2.50239e-75	0.830836	0.0964575	64.9	73.9	78.4	26.9	No
Smad1	0.97	0.16	0.02	0.01	1.54044e-05	0.841426	0.979134	55.7	55.5	58.2	17.3	Yes
Denr	1.45	0.13	0.02	-0.75	6.94964e-07	0.772371	0.0258952	74.4	74.3	77.8	13.5	No
Rhoj	2.53	0.77	0.02	-1.93	1.64909e-111	0.830836	2.9365e-07	67.1	77.4	78.1	3.8	No
Tab2	1.8	-0.23	0.02	-0.04	1.80182e-18	0.788666	0.904464	82.5	74	75.7	40.4	No
Gtpbp4	1.08	0.31	0.02	-0.34	1.0935e-13	0.862268	0.391325	54.6	53.7	58.7	11.5	No
Ifit1	1.99	-0.94	0.02	-1.18	5.76706e-62	0.908381	0.0281052	56.4	44.7	45.1	1.9	No
Atp6v1d	1.24	-0.07	0.02	-0.33	0.0300323	0.798923	0.31589	72.4	67.6	71	21.2	No
Vmp1	1.6	0.3	0.02	0.13	5.33292e-24	0.803747	0.686071	72.6	74.6	81.2	34.6	No
Kdsr	0.74	-0.01	0.02	1.17	0.770264	0.845418	0.000277903	53.6	48.9	54.4	30.8	No
Eif3l	0.71	0.31	0.02	0.33	6.05023e-18	0.837942	0.320525	48.5	51.7	54.4	15.4	No
Bet1l	0.76	0.08	0.02	0.27	0.0338427	0.837298	0.41855	55.1	53	55.4	19.2	No
Prpf6	1.13	0.14	0.02	0.8	1.21759e-05	0.823335	0.0120695	63.3	63.7	65.8	34.6	No
Ywhaq	6.77	0.18	0.02	-1.44	1.90755e-34	0.608671	7.4926e-09	98.9	99.2	99.4	42.3	No
Sec22a	1.54	-0.07	0.02	1.72	0.0314808	0.819503	2.27574e-14	72.5	68.2	73.7	59.6	No
Utp6	0.71	-0.09	0.02	0.69	0.0400885	0.862046	0.0558627	51	45.5	47.6	21.2	No
Gsk3b	5.48	-0.09	0.02	0.34	2.15518e-08	0.657526	0.0617091	98.4	97.7	98.1	84.6	No
Uqcr11	6.28	0.32	0.02	-1.31	2.16607e-117	0.585218	5.35038e-08	98.3	98.8	99.8	46.2	No
Mrpl13	1.29	0.21	0.02	-0.24	4.62111e-15	0.789095	0.457309	71.8	72.4	76.7	19.2	No
Rprd1b	0.94	-0.01	0.02	1.2	0.745175	0.843073	7.78294e-05	59.9	55.3	57.9	44.2	No
Tapbp	1.97	-0.51	0.02	-0.93	4.89191e-93	0.805253	0.00821704	87.3	75.6	78.2	15.4	No
Sept11	0.95	0.15	0.02	-0.02	8.30031e-05	0.855188	0.95473	56.3	54.4	59.3	17.3	No
Zc3h18	0.8	-0.08	0.02	1.1	0.034308	0.855329	0.000736344	56.7	50	51.6	40.4	No
Sra1	0.95	0.15	0.02	0.13	5.103e-06	0.828424	0.688024	61.2	61.1	62.9	25	No
Ifit3	3.8	-1.29	0.02	-1.67	1.6122e-259	0.87511	6.39941e-05	88.6	73.5	69.1	7.7	No
0610012G03Rik	1.68	0.15	0.02	-0.08	6.11505e-10	0.771726	0.809879	80.5	80.4	83.8	36.5	No
H2afj	1.3	0.35	0.02	-0.46	2.14513e-33	0.813597	0.176752	68.1	70.1	74.4	21.2	No
Gigyf2	2.79	-0.14	0.02	0.45	1.14838e-09	0.767889	0.0656187	91.4	86.5	87.9	59.6	No
Uqcrfs1	1.41	0.06	0.02	-0.34	0.0274543	0.797949	0.298437	76.1	74	78.7	19.2	No
Pitpna	1.88	0.15	0.02	0.22	1.18809e-09	0.788758	0.436852	80.6	80.5	83.1	51.9	No
Herc1	2.44	-0.06	0.02	0.65	0.0142369	0.780241	0.00781095	88.3	83.6	86.1	50	No
Sh3gl2	1.79	-0.16	0.02	2.31	1.78048e-06	0.847978	3.33372e-26	74.5	67.3	72.7	82.7	No
Igkc	0.54	-0.6	0.02	0.8	1.01564e-50	0.887443	0.027416	50.4	32.6	37.1	11.5	No
Abhd4	1.02	0.2	0.02	-0.09	3.12756e-10	0.8375	0.795113	60.9	62.4	64.8	17.3	No
Bcor	1.27	0.19	0.02	0.03	1.92769e-07	0.86164	0.935105	59.8	60.2	66.2	28.8	No
Ash1l	5.21	-0.04	0.02	0.19	0.0156661	0.702493	0.323816	98.1	96.8	98.4	78.8	No
Arhgef26	2	-0.16	0.02	1.78	4.72123e-08	0.832405	4.91871e-17	80.7	72.1	78.5	80.8	No
Psma1	1.4	0.07	0.02	-0.07	0.0121748	0.807405	0.839506	76.5	74.1	76.7	26.9	No
Prxl2a	2.21	-0.11	0.02	-0.29	4.45957e-07	0.773836	0.334143	89.7	83.4	87.1	30.8	No
Ubxn7	1.65	-0.08	0.02	0.77	0.00905588	0.830254	0.00789543	78.7	71.2	76.7	55.8	No
Maco1	1.38	-0.14	0.02	0.12	8.2475e-06	0.841117	0.715211	73.3	65.8	68.5	28.8	No
Nfyb	0.81	0.17	0.02	0.67	1.01857e-05	0.866825	0.0508285	52.9	52.2	56.8	28.8	Yes
Zfp451	1.11	-0.07	0.02	0.2	0.0471172	0.852728	0.56254	65.4	59.8	64.5	25	No
Egr1	16.12	0.98	0.02	-2.92	0	0.746179	3.80399e-29	96.2	98.2	98.7	36.5	Yes
Fosb	12.42	0.9	0.02	-4.16	2.27835e-253	0.820878	8.38477e-34	89.9	93.6	95.1	15.4	Yes
Syt14	0.51	-0.16	0.02	2.81	0.0127328	0.923886	4.66251e-13	31.4	27.3	32.5	51.9	No
Ephb2	2.2	-0.05	0.02	-1.61	0.228613	0.862046	1.82257e-05	75.8	69	74.8	7.7	No
Emd	0.76	0.58	0.02	-0.27	5.09894e-45	0.884339	0.462697	45.4	51	51.6	7.7	No
Mrpl4	0.72	0.19	0.02	0.03	2.45806e-07	0.869066	0.929564	51.1	51.7	55.7	9.6	No
Rnf14	1.11	-0.11	0.02	0.39	0.000396592	0.85453	0.242908	67.6	61	64.4	36.5	No
H2-Q7	2.66	-0.6	0.02	-1.54	5.3985e-106	0.846124	1.51499e-05	89.3	74.6	76	9.6	No
Myl12a	1.66	0.68	0.02	-1.38	1.19919e-131	0.824428	4.44854e-05	70.8	80.1	82.6	9.6	No
Baz1b	1.76	-0.13	0.02	0.63	6.70082e-07	0.833534	0.027162	80.3	74.5	79.3	51.9	No
Mrpl24	1.05	0.31	0.02	0.11	1.00216e-23	0.847249	0.746508	61.6	65.1	68.9	25	No
Suclg2	1.04	0.2	0.02	-0.6	3.52191e-08	0.873821	0.101296	57.2	58.7	61.5	3.8	No
Supt4a	1.26	0.24	0.02	-0.49	3.05028e-17	0.834581	0.145816	70.5	72.4	74.4	13.5	No
Sarnp	2.59	0.05	0.02	0.23	0.0251484	0.773836	0.356544	91.3	90.2	92.4	51.9	No
Myh9	1.28	0.63	0.02	-0.49	3.86771e-75	0.866454	0.183004	58.1	66.6	71	15.4	No
Fam120a	2.04	-0.08	0.02	0.56	0.000560492	0.811289	0.0312354	86.6	81.6	84.1	55.8	No
Map3k4	1.1	-0.08	0.02	0.53	0.0173379	0.862314	0.106142	67.2	61.9	65	36.5	No
Tmf1	1.22	-0.21	0.02	-0.42	4.28052e-12	0.863273	0.229714	70.5	62.3	67.7	9.6	Yes
Dcaf8	2.45	-0.08	0.02	0.23	0.000690374	0.800804	0.377708	90.9	86.2	90.4	57.7	No
Cdc23	0.75	-0.01	0.02	0.71	0.744606	0.884734	0.0379999	53.5	49	53.3	26.9	No
Umad1	1.08	0.02	0.02	1.92	0.656681	0.906715	1.61904e-09	50.2	48.4	56.5	59.6	No
Eif4ebp2	0.95	0.08	0.02	-0.17	0.0185626	0.870489	0.613307	61	57.6	61.8	15.4	No
Hipk1	2.13	-0.1	0.02	-1.07	1.36365e-05	0.813889	0.00154569	86.5	81.7	86	19.2	No
Lemd3	0.9	-0.09	0.02	0.95	0.0312652	0.888186	0.00675361	56.5	50.9	55.5	34.6	No
[truncated: 3,145 more rows]

## Sheet: Samples
Gene	BaseMean	log2FC.CCA_vs_Control	log2FC.CCANT_vs_Control	log2FC.CCANT_vs_CCA	P.adj.CCA_vs_Control	P.adj.CCANT_vs_Control	P.adj.CCANT_vs_CCA	pct.A	pct.B	pct.C
Gngt1	3.6	2.03	3.21	1.18	9.11563e-284	0	9.62017e-108	45.7	69.5	69.5
Pde6g	2.22	1.94	3.03	1.09	2.0888e-235	0	6.2681e-88	36.1	57.9	57.9
Rcvrn	1.7	1.95	2.96	1.02	2.53772e-178	0	1.52419e-55	28.3	45.3	45.3
Gm26802	0.99	2.25	2.82	0.57	1.79719e-156	7.98512e-233	3.78746e-11	8.8	32.2	32.2
Gnat1	2.91	1.81	2.69	0.87	2.96111e-253	0	1.15968e-66	50.9	67.8	67.8
Rho	8.62	1.9	2.66	0.76	0	0	7.45849e-62	82.2	92.5	92.5
Rbp3	0.89	1.4	2.54	1.14	5.47429e-76	9.27207e-247	3.6548e-54	19.8	31.3	31.3
Prph2	2.06	1.78	2.52	0.73	2.84395e-175	0	2.51542e-33	39.3	52.6	52.6
Pdc	2.38	1.66	2.36	0.7	1.21804e-179	0	1.56629e-35	45.1	61.3	61.3
Nr4a1	0.88	2.1	2.34	0.23	8.60009e-167	7.19023e-193	0.00616009	11.1	36.5	36.5
Cdkn1a	1.13	2.8	2.32	-0.48	9.7602e-202	2.80802e-126	1.223e-06	11.2	35.8	35.8
Nrl	0.75	1.36	2.3	0.94	4.30744e-73	9.06826e-204	1.37645e-36	17.1	29.7	29.7
Gfap	1.3	1.74	2.2	0.46	1.107e-77	7.71947e-116	3.54648e-06	15.1	28.8	28.8
Slc24a1	0.87	1.28	2.18	0.9	9.52557e-57	1.93556e-159	9.45825e-30	20.8	28.4	28.4
Rom1	2.26	1.49	2.18	0.69	4.92707e-175	0	1.45101e-41	53.5	65	65
Zfp385b	0.68	0.88	2.14	1.25	3.84041e-25	3.09873e-141	2.26303e-50	17.3	22	22
Cnga1	0.79	1.33	2.12	0.79	6.12271e-53	3.31269e-128	2.49546e-19	17.3	25.8	25.8
Egr3	0.52	1.44	2.1	0.66	2.76737e-36	2.71509e-71	8.65093e-08	5	19	19
Pvt1	0.38	0.84	2.09	1.25	3.68326e-14	6.99053e-79	8.033e-29	3.2	11.6	11.6
Guca1a	1.03	1.47	2.09	0.62	4.1977e-131	2.76347e-260	1.66064e-27	29.5	46.2	46.2
Ndufa4l2	0.51	1.65	2.06	0.41	1.17646e-44	1.74929e-64	0.00216566	4.7	18.6	18.6
Tulp1	0.99	1.31	2.01	0.71	2.99291e-92	5.07211e-215	1.36484e-30	27.9	41.6	41.6
Socs3	2.31	2.13	2	-0.13	3.5179e-217	3.47621e-177	0.12672	31.3	51.3	51.3
Smim40	0.44	0.91	1.99	1.08	7.99305e-27	5.18783e-122	6.29323e-37	10.2	21.4	21.4
A2m	0.91	1.09	1.98	0.88	3.06179e-37	1.18411e-115	4.64887e-25	15.2	28.5	28.5
Vtn	0.52	1.12	1.97	0.85	1.72446e-42	2.144e-125	2.1952e-24	12.2	24.9	24.9
Npsr1	1.4	1.96	1.96	0.01	1.21841e-96	4.72447e-90	0.962237	15.9	33.7	33.7
Grik3	0.55	0.75	1.96	1.21	5.53726e-19	2.8514e-123	2.22014e-48	12.6	21	21
Guca1b	0.7	1.23	1.89	0.66	5.04366e-66	7.50208e-150	6.59043e-20	20	31.6	31.6
Anxa2	0.62	1.38	1.88	0.49	3.21539e-75	9.43207e-132	2.2518e-10	13.7	29.5	29.5
Sag	2.99	1.4	1.88	0.48	2.10632e-181	0	8.16168e-23	63	73.3	73.3
Ano3	0.49	1.56	1.87	0.31	2.31188e-27	5.18108e-36	0.0835755	5.2	14.4	14.4
Ccnd2	0.59	0.57	1.86	1.29	9.0952e-11	6.85306e-104	3.34474e-51	13.6	17.6	17.6
Anks1b	0.8	1.25	1.84	0.6	3.63312e-67	3.94262e-141	9.46796e-17	21.7	33.8	33.8
Pde6a	0.83	1.22	1.82	0.6	2.20471e-58	1.11721e-124	2.8565e-15	24.3	29.7	29.7
Rs1	0.69	1.1	1.82	0.72	6.9914e-41	5.17495e-107	3.2562e-18	20.5	24.7	24.7
Emp3	0.39	0.9	1.81	0.91	3.81657e-29	1.62815e-111	4.82653e-29	7.5	20	20
Tagln2	1.23	2.09	1.8	-0.29	1.80343e-237	1.46028e-161	1.27382e-05	23.3	51.1	51.1
Rp1	1.23	1.25	1.79	0.54	3.72317e-66	1.14117e-128	1.8625e-13	32.8	36	36
Csmd1	0.57	0.52	1.76	1.24	0.000122415	6.44823e-41	7.64864e-21	13.2	15.3	15.3
Rtbdn	0.5	0.99	1.76	0.77	3.50795e-35	7.69643e-106	2.70149e-21	14.5	24.8	24.8
Top2a	0.7	3.01	1.75	-1.26	2.30699e-38	1.60628e-12	8.35153e-07	0.5	13.5	13.5
Slc17a7	0.47	0.99	1.69	0.69	3.93471e-40	2.79767e-110	1.18994e-19	14.2	26.2	26.2
Arc	0.52	1.48	1.68	0.21	2.23505e-28	6.20774e-34	0.240271	6.1	17.9	17.9
Pde6b	0.8	1.14	1.68	0.54	1.27816e-53	6.26253e-110	1.3465e-12	25.6	31.5	31.5
Iqgap2	0.57	0.82	1.68	0.85	1.65794e-26	6.60336e-105	1.28352e-28	15.5	25.2	25.2
Txnip	1.68	0.7	1.66	0.96	1.87365e-34	2.65852e-185	1.20127e-65	39	44.5	44.5
Tuba1c	0.58	2.3	1.66	-0.65	2.56834e-145	1.84079e-67	1.66147e-11	7	29.5	29.5
Prcd	0.42	0.77	1.66	0.88	2.65842e-20	1.42472e-86	2.18737e-25	13	21.3	21.3
Gadd45g	0.92	1.74	1.65	-0.09	6.22259e-87	2.98487e-72	0.487048	18	31.7	31.7
1200007C13Rik	0.65	2.15	1.65	-0.5	8.55714e-38	9.89583e-21	0.0109873	4	15.3	15.3
Cngb1	0.52	0.94	1.64	0.7	1.85896e-33	9.82596e-97	1.19392e-18	15.8	25.7	25.7
Igf2bp2	0.3	0.47	1.64	1.17	9.78324e-07	7.94228e-68	4.30342e-35	7.7	11.4	11.4
Zfp36	3.3	1.68	1.61	-0.07	7.11343e-260	6.19896e-219	0.240724	48.4	71.6	71.6
Nebl	0.69	1.22	1.59	0.36	1.90108e-44	1.17077e-69	0.000143056	14.8	25.6	25.6
Hmgb2	2.21	2.6	1.57	-1.02	0	1.16265e-126	1.82959e-63	41.5	61.4	61.4
Hspb1	0.38	0.82	1.56	0.73	5.89037e-16	2.73128e-51	5.84537e-12	8	17.2	17.2
Nr4a3	0.35	1.46	1.55	0.09	1.30376e-16	3.81735e-17	0.762482	3.2	11.9	11.9
Syne1	0.53	0.17	1.54	1.36	0.0171021	1.61763e-121	6.13869e-97	21.1	21.2	21.2
Ephx1	0.89	1.32	1.52	0.19	1.42291e-141	5.40782e-177	0.000295152	30.8	49.9	49.9
Bdnf	0.39	0.92	1.51	0.6	9.80147e-28	2.43507e-70	1.00897e-11	10.1	22	22
Cplx4	0.45	0.84	1.51	0.67	6.67968e-22	1.06615e-65	9.37652e-14	13.4	20.7	20.7
Nr2e3	0.46	0.77	1.49	0.73	4.29916e-19	1.73409e-66	2.05605e-16	14.7	21.3	21.3
Atp1a3	0.64	0.79	1.49	0.7	1.57478e-38	1.63187e-134	4.05728e-32	29	35.3	35.3
Il1rap	0.79	0.59	1.48	0.89	8.42582e-21	1.44692e-128	3.4635e-50	28.8	33.2	33.2
Atf3	1.35	2.23	1.47	-0.76	1.41626e-141	4.58204e-56	9.54979e-17	17.5	40.3	40.3
Hmga2	0.29	0.34	1.47	1.12	0.0292031	1.53026e-22	1.73675e-13	4.3	7.7	7.7
Mt2	6.18	1.26	1.45	0.19	4.80414e-271	0	1.27522e-06	84.8	92.2	92.2
Unc119	2.19	0.77	1.43	0.66	1.77679e-87	1.29454e-297	1.9047e-70	70.9	76.3	76.3
Aff2	0.53	0.44	1.43	0.99	5.7048e-05	1.77669e-40	8.61527e-20	12.8	16.4	16.4
Lyn	0.51	0.4	1.42	1.02	6.27695e-08	4.50507e-87	8.32841e-46	19.2	22.7	22.7
Bcl2l11	0.96	0.82	1.41	0.59	1.76652e-59	9.55434e-174	7.05289e-35	37.3	46.7	46.7
Flnc	0.34	0.96	1.39	0.44	2.79302e-16	4.43735e-31	0.000887297	7.2	13.7	13.7
Hs3st4	1.08	0.36	1.39	1.03	3.99383e-05	1.29458e-59	2.62959e-33	21.7	25.5	25.5
Neurod1	0.43	0.73	1.39	0.66	3.01464e-18	3.84184e-61	1.27755e-14	14.8	21	21
Phlda3	1.14	1.31	1.39	0.08	2.6029e-137	6.71202e-144	0.239623	39.8	55	55
Btg2	17.13	1.57	1.39	-0.18	0	0	2.53135e-07	90.3	94.9	94.9
Akap12	1.18	0.95	1.38	0.43	3.54032e-47	1.16182e-93	2.21023e-10	28.5	39.8	39.8
Fam57b	0.77	0.89	1.37	0.48	8.65824e-55	6.22281e-126	1.16644e-17	32.9	41.6	41.6
Ntf3	0.23	0.53	1.36	0.83	9.6714e-06	3.66429e-30	9.75139e-12	4.9	10.7	10.7
Dusp5	0.27	0.99	1.35	0.36	2.95227e-16	3.00892e-27	0.0104343	4.4	15.8	15.8
Aipl1	0.39	0.83	1.35	0.52	1.02666e-23	2.98729e-58	1.67998e-09	12.1	22.4	22.4
S100a6	10.44	0.75	1.35	0.59	1.19677e-119	0	4.54749e-72	96	96.2	96.2
Ntm	1.02	1.21	1.34	0.13	1.16873e-60	5.26484e-69	0.162621	27.1	36.4	36.4
Junb	15.45	1.31	1.34	0.03	0	0	0.55593	87.2	93.5	93.5
Ckap2	0.64	3.03	1.34	-1.69	1.02764e-69	5.02136e-13	1.75834e-20	1.6	18.1	18.1
Gadd45b	0.69	1.73	1.34	-0.4	3.47665e-112	2.1246e-60	2.0171e-06	18.8	32	32
Cenpf	0.74	3.31	1.34	-1.97	5.03563e-29	3.51395e-05	5.87621e-10	0.3	9.4	9.4
Lmna	1.05	1.25	1.33	0.08	1.62378e-108	3.92631e-115	0.246342	36.3	49.9	49.9
Ndrg1	1.15	0.88	1.33	0.45	1.58028e-75	1.08531e-169	4.61704e-23	42.2	54.2	54.2
Serpina3n	0.46	0.87	1.3	0.44	4.91743e-12	3.40907e-24	0.00191601	6.7	16.1	16.1
Hist1h2ae	0.46	1.61	1.28	-0.33	9.7967e-60	1.44929e-34	0.00401449	14.2	21.5	21.5
Timp1	0.35	0.59	1.26	0.67	1.91487e-07	2.07571e-28	1.42979e-08	6.9	15.5	15.5
Impdh1	0.34	0.57	1.26	0.69	1.91802e-14	2.22178e-63	1.41354e-19	15.3	21.5	21.5
Stx3	0.58	0.66	1.25	0.59	9.48028e-27	1.87972e-92	3.56261e-22	27.1	33	33
Cebpb	1.38	1.28	1.25	-0.03	4.92402e-122	2.27604e-108	0.768923	43.4	52.8	52.8
Morrbid	0.27	0.68	1.24	0.56	5.39423e-08	1.41356e-22	3.14331e-05	5.7	11.9	11.9
Crispld2	0.44	0.54	1.23	0.7	5.17507e-12	6.06947e-57	7.54635e-19	18.3	23.8	23.8
Mki67	0.48	2.52	1.22	-1.3	5.07832e-23	1.03844e-05	3.31766e-06	0.6	11.2	11.2
Lockd	2.19	2.19	1.21	-0.98	0	5.02411e-99	2.27734e-75	47.7	68.6	68.6
Ptp4a3	0.61	0.79	1.21	0.42	1.75006e-45	8.92295e-103	5.76659e-14	30.3	38.7	38.7
Mt1	23.53	1.11	1.21	0.1	0	0	0.00456721	99.2	99.6	99.6
Ier2	7.5	1.25	1.2	-0.05	0	3.37506e-290	0.194977	85.6	91.9	91.9
Runx1	0.19	0.46	1.19	0.73	0.0012311	5.24618e-17	8.66037e-07	3.1	7.6	7.6
Eno1b	0.92	1	1.19	0.19	3.18829e-138	1.31797e-190	3.2216e-07	42.9	61.2	61.2
Wnt5b	0.98	0.36	1.19	0.83	1.89812e-07	9.95374e-71	1.46241e-35	30	32.6	32.6
H1fx	0.44	1.68	1.18	-0.5	2.06424e-72	1.06891e-32	1.38717e-06	10.8	23.5	23.5
Cdhr1	0.24	0.57	1.18	0.61	7.22155e-07	3.58736e-24	5.39712e-07	7	13.1	13.1
Gas7	0.34	0.72	1.17	0.46	7.33986e-14	2.58838e-33	9.09203e-06	10.6	17.9	17.9
Igfbp2	0.37	0.61	1.17	0.57	1.18637e-09	2.7168e-31	6.86642e-08	11.5	20	20
Enkur	0.45	1.22	1.17	-0.05	2.07365e-58	4.2931e-49	0.666061	14.4	27.4	27.4
Gria3	0.93	1.11	1.17	0.06	2.19263e-49	3.91544e-51	0.56252	26	36.3	36.3
Gm2000	0.5	1.11	1.16	0.05	2.85196e-123	9.10105e-126	0.380315	22.8	44.7	44.7
Runx2	0.26	0.21	1.16	0.96	0.0472758	2.56971e-32	4.65781e-22	11.4	12	12
Hist1h1b	0.48	2.04	1.16	-0.87	5.33233e-38	6.7149e-12	4.42995e-07	6.7	15.4	15.4
Ppp1r15a	0.74	1.37	1.15	-0.22	1.11456e-106	2.60077e-68	0.00145926	26.4	41.6	41.6
Prom1	0.42	0.78	1.15	0.37	4.41186e-21	1.13542e-41	4.97348e-05	14.6	22.7	22.7
Drd4	0.22	0.43	1.14	0.71	0.000176688	2.89362e-23	2.17457e-09	6.3	12	12
Gas6	1.21	1.02	1.13	0.11	2.08729e-111	2.52897e-127	0.0409852	46.1	60.8	60.8
Prc1	0.45	2.19	1.12	-1.07	1.42677e-36	1.76149e-09	1.47282e-08	6.1	13.7	13.7
Itm2a	0.52	0.71	1.12	0.41	5.56751e-33	2.574e-77	2.24899e-11	26.1	34.2	34.2
Kcnb1	1.15	0.77	1.12	0.35	3.39641e-42	9.58813e-84	2.59476e-09	44.6	46.1	46.1
Efnb2	1.33	0.37	1.11	0.74	7.98644e-08	2.48461e-60	1.40668e-27	37	39.3	39.3
Hist1h1c	0.75	1.37	1.11	-0.26	1.20458e-105	1.6325e-62	0.000124732	29.9	40.7	40.7
Hk2	0.62	0.47	1.1	0.63	1.62384e-13	1.49069e-68	8.99164e-24	29.1	32.2	32.2
Nfatc2	0.26	0.94	1.09	0.15	9.21483e-12	3.48463e-14	0.460104	4.4	13.9	13.9
Map1b	1.86	0.84	1.08	0.24	1.21537e-67	1.64614e-105	1.97354e-06	51.3	62.1	62.1
Vit	1.41	0.61	1.08	0.47	7.38371e-36	2.5246e-106	1.12143e-21	42.8	54.1	54.1
Etl4	1.43	0.48	1.08	0.6	1.81968e-13	1.38491e-61	6.22375e-20	34.5	39.9	39.9
Tnxb	0.67	0.88	1.07	0.19	1.96649e-53	8.26453e-74	0.00282657	27.6	40.3	40.3
Capg	0.25	0.6	1.07	0.48	3.53116e-13	1.33312e-37	5.00268e-08	9.5	18.2	18.2
Cited1	0.7	1.38	1.07	-0.31	3.6896e-100	1.97904e-54	9.68777e-06	24.6	41.3	41.3
Fos	30.72	1.08	1.07	-0.02	0	0	0.615498	98.3	98.2	98.2
Ifitm2	1.44	0.49	1.07	0.58	1.82917e-20	4.35233e-91	4.01293e-28	41.6	49.3	49.3
Hist1h2ap	1.44	1.71	1.06	-0.64	4.21454e-182	1.98025e-63	1.51896e-26	46.4	49.9	49.9
Ctsd	2.64	0.55	1.06	0.51	3.98725e-82	4.73416e-300	2.57974e-75	82.9	86.4	86.4
Gnb3	0.48	0.71	1.06	0.35	1.22934e-34	1.38757e-72	7.79497e-09	24.7	33.7	33.7
Pde3a	1.91	0.7	1.06	0.36	4.53933e-34	3.62775e-73	1.49903e-09	45	52	52
Rps28	11.55	0.68	1.06	0.38	0	0	5.07848e-99	98.9	99.2	99.2
Cks2	0.45	2.32	1.05	-1.27	2.37884e-39	3.80016e-08	2.60143e-11	3.4	14.2	14.2
Dynll1	2.08	0.62	1.05	0.43	3.87445e-66	1.93641e-184	3.71914e-34	70.6	74.5	74.5
Pcdh7	1.89	0.5	1.05	0.55	1.65551e-10	4.94467e-41	4.63817e-12	33.4	37.6	37.6
Net1	0.47	0.74	1.04	0.3	5.82518e-32	2.56561e-58	1.28313e-05	22.3	31.2	31.2
Bc1	0.74	1.58	1.03	-0.54	2.0721e-106	6.22548e-41	5.6925e-13	23.6	38.9	38.9
Serpine2	0.3	0.77	1.03	0.26	8.24328e-16	1.57507e-25	0.0207529	11.8	18.7	18.7
Tenm3	2.36	0.56	1.03	0.46	1.17512e-17	6.81351e-53	1.69472e-11	37.1	46.9	46.9
Apoc1	1.56	0.31	1.02	0.71	1.41632e-07	9.23214e-69	8.8091e-34	47.9	45.4	45.4
Sdc4	3.15	0.57	1.02	0.45	2.39119e-88	1.5435e-280	1.92943e-60	86.7	88.4	88.4
Pim1	0.94	1.14	1.02	-0.12	1.74144e-104	6.10686e-77	0.0555303	38.3	51.1	51.1
Klf6	1.45	1.1	1	-0.1	2.29024e-105	1.59397e-80	0.118437	47.8	58.6	58.6
Cdkn2c	0.57	1.47	1	-0.47	3.20686e-151	7.9465e-61	7.47743e-16	24.6	43.7	43.7
Rps27rt	0.42	0.84	1	0.15	3.09946e-65	1.17559e-84	0.00728873	21.9	37.3	37.3
Tiam2	0.37	0.36	1	0.64	0.000358154	1.11833e-23	4.29465e-10	14	16	16
Abca4	0.38	0.54	0.99	0.45	3.07939e-09	1.2656e-26	4.36278e-06	14.9	17.1	17.1
Nxph1	0.36	0.95	0.99	0.04	9.52725e-07	9.84468e-07	0.907483	5.3	10.1	10.1
Ccn1	12.79	1.06	0.98	-0.08	9.19293e-178	5.60877e-140	0.095691	80.1	88.5	88.5
Rpl41	17.51	0.62	0.98	0.36	0	0	3.60203e-119	99.8	99.4	99.4
Crx	0.32	0.51	0.98	0.46	3.30493e-10	4.35865e-32	7.92917e-08	14.6	19.2	19.2
Tma7	6.31	0.51	0.97	0.46	1.39228e-96	0	3.85702e-78	97.9	98.1	98.1
C1ql1	0.27	0.47	0.97	0.5	4.95953e-07	5.77418e-25	3.18985e-07	12.4	17.2	17.2
Impg2	0.29	0.44	0.96	0.52	1.11769e-05	2.63366e-21	1.05389e-06	11.8	14.6	14.6
Ajap1	0.13	0.29	0.96	0.67	0.106506	4.20836e-08		3	4.9	4.9
Nfkbiz	3	0.98	0.95	-0.03	8.20494e-125	1.54136e-108	0.662175	68.7	75.8	75.8
Gng13	0.33	0.57	0.95	0.37	4.43217e-24	1.87297e-60	3.82791e-10	17.9	27.7	27.7
Gm11808	0.39	0.63	0.95	0.31	9.959e-36	5.29736e-75	4.06231e-09	22.1	33.6	33.6
Rgs9	0.94	0.56	0.94	0.38	9.89055e-27	5.94142e-71	7.88413e-13	42.8	45.8	45.8
Shisa6	0.31	0.61	0.94	0.34	2.16255e-07	3.16681e-15	0.0120713	10.8	14.7	14.7
Reep6	0.91	0.42	0.94	0.52	2.55861e-18	3.99077e-87	2.20134e-28	48.1	49.6	49.6
Trf	8.1	0.63	0.93	0.3	2.0593e-64	1.09162e-130	9.27983e-15	84.3	84.6	84.6
Egr1	16.03	0.91	0.93	0.02	0	0	0.627486	97.1	96.6	96.6
Rbpms	0.64	0.7	0.92	0.22	7.96934e-24	4.43955e-38	0.00468633	24.4	33	33
Klhl29	0.52	0.64	0.92	0.28	2.40665e-17	4.14543e-33	0.000590562	20.9	26.4	26.4
Rasl11a	0.28	0.55	0.92	0.37	1.39139e-10	6.94825e-26	7.46142e-05	13	18.7	18.7
AI847159	0.23	0.47	0.92	0.45	4.9038e-05	3.49392e-15	0.000334091	7.6	12.4	12.4
Cdkn1c	1.22	0.59	0.91	0.32	1.70847e-29	2.21709e-66	2.08135e-09	47.2	49.2	49.2
Cavin3	0.62	0.6	0.91	0.31	2.29683e-31	7.12317e-68	5.32075e-09	32.8	41.3	41.3
Prkca	2.01	0.48	0.91	0.43	1.38182e-31	1.47411e-106	4.61455e-25	59.4	66.4	66.4
Sbno2	0.77	0.86	0.91	0.05	7.82389e-49	2.91681e-50	0.588412	35.2	41.7	41.7
Plekha4	0.96	0.5	0.91	0.4	4.0907e-28	2.21831e-88	2.08425e-19	45.9	51.2	51.2
Ppp2r2b	0.63	0.78	0.91	0.13	2.02255e-21	7.58767e-27	0.21464	22	23.1	23.1
2610307P16Rik	1.82	0.37	0.91	0.53	5.62304e-18	4.25515e-100	3.12279e-36	56.1	60	60
Smc4	0.91	1.46	0.9	-0.56	1.02007e-128	1.01396e-43	2.0046e-19	34.1	46	46
Alcam	0.19	0.26	0.9	0.64	0.196461	2.94211e-06	0.00170932	7.1	6.1	6.1
Atad2	0.43	1.43	0.89	-0.54	2.28109e-45	1.45712e-16	1.46196e-06	15.1	21.4	21.4
H2afx	0.49	1.38	0.89	-0.49	7.84326e-77	5.11017e-29	1.22726e-09	22.1	29	29
Gm26887	1.09	0.62	0.89	0.27	6.91505e-29	8.09033e-55	7.69132e-06	39	46	46
Fn1	0.3	0.59	0.89	0.3	6.32872e-10	5.38592e-20	0.00490644	12.8	17.4	17.4
Abca1	1.31	0.1	0.89	0.78	0.0241024	2.18531e-105	6.53283e-82	57.6	53	53
Apobec1	0.5	0.39	0.88	0.49	5.64129e-10	2.02796e-45	6.27873e-15	26.4	29.8	29.8
Mtus2	0.65	0.71	0.88	0.17	6.66777e-22	1.04973e-30	0.0588058	24.9	32	32
Tmsb10	3.2	0.53	0.88	0.35	5.02885e-60	3.18579e-158	4.30152e-27	83.7	85.5	85.5
Lmnb1	0.71	1.72	0.88	-0.84	5.10797e-142	1.96209e-32	2.531e-33	27.6	39.8	39.8
Zbtb7c	0.2	0.45	0.88	0.42	0.0014237	6.81045e-10	0.00644041	6.1	10.5	10.5
Ier3	1.77	0.55	0.88	0.33	1.33917e-25	8.91744e-61	1.76921e-09	54.7	57	57
Nhsl1	0.29	0.5	0.87	0.37	9.13782e-08	4.83701e-20	0.000277152	13	17.1	17.1
Tpx2	0.39	2.07	0.87	-1.2	6.96123e-23	0.000157385	1.43045e-07	3.8	11.5	11.5
Cenpe	0.27	1.4	0.86	-0.53	5.01308e-07	0.00396444	0.120437	1.7	7.5	7.5
Vcl	3.94	0.78	0.86	0.08	6.93679e-134	7.50208e-150	0.0416492	85.7	88.9	88.9
Cenpp	0.33	1.45	0.86	-0.59	2.11261e-19	6.77792e-07	0.00122863	6.7	13.1	13.1
Nxnl2	0.17	0.47	0.86	0.39	0.000549969	2.9821e-10		5	11.4	11.4
Pdlim4	3.46	0.88	0.86	-0.02	3.23731e-203	3.8672e-177	0.568067	87.2	91.7	91.7
Rdh12	0.32	0.52	0.86	0.33	1.28027e-10	5.68585e-25	0.000180431	14.9	20.2	20.2
Ptpn3	0.76	0.47	0.86	0.39	1.06042e-18	1.43291e-58	3.21654e-13	35.6	41.4	41.4
Cntn3	0.28	0.81	0.85	0.04	1.04428e-06	8.06829e-07	0.881111	6	10.7	10.7
Col4a6	1.65	0.53	0.85	0.32	4.62925e-25	3.20405e-60	1.46176e-09	47.1	54.2	54.2
Racgap1	0.31	1.66	0.85	-0.81	7.89504e-21	1.03583e-05	3.40415e-05	3.8	13.1	13.1
Eif1a	0.57	0.76	0.84	0.08	8.558e-50	4.19609e-56	0.23486	30.8	41.4	41.4
Anxa1	4.47	0.56	0.84	0.27	1.47428e-33	1.08728e-67	5.84339e-08	60.8	71.8	71.8
Actg1	10.25	0.87	0.83	-0.04	2.03957e-304	2.0658e-253	0.16544	98.6	98.4	98.4
Sdk1	0.31	0.94	0.82	-0.11	1.15442e-14	1.12659e-10	0.523229	11.4	14.5	14.5
Fxyd3	0.33	0.28	0.82	0.54	0.000205855	1.47686e-28	7.66397e-13	19.8	21.2	21.2
Eif4ebp1	0.35	0.52	0.82	0.3	1.06641e-19	6.67448e-44	1.92911e-06	20.1	27.5	27.5
1500015L24Rik	0.47	0.51	0.82	0.31	4.04787e-08	4.26883e-18	0.00279859	18.6	20.9	20.9
Arhgap22	0.12	0.42	0.82	0.39	0.0265235	1.77186e-05		2.1	5.4	5.4
Impg1	0.25	0.45	0.81	0.35	0.000245202	1.0527e-10	0.0107003	7.8	11.4	11.4
Ass1	2.05	0.73	0.81	0.08	1.28245e-112	1.65796e-129	0.0319172	72.5	79.4	79.4
P2rx7	0.2	0.48	0.81	0.32	6.16678e-05	5.18404e-11	0.0197553	7.2	12.1	12.1
Osbpl6	1.14	0.16	0.81	0.64	0.00579413	6.03101e-49	1.7686e-31	45.6	41.9	41.9
Gnb1	5.99	0.43	0.8	0.37	1.12664e-62	3.21055e-203	6.18736e-45	98.1	97.4	97.4
Mt3	3.07	0.29	0.8	0.51	9.56553e-22	1.29805e-160	7.32133e-68	83.6	83.6	83.6
H3f3b	25.39	0.9	0.8	-0.1	0	0	1.56602e-07	99.8	100	100
Fosl2	0.28	0.62	0.79	0.18	7.21582e-13	3.10968e-19	0.0903394	14	19.2	19.2
Col1a2	0.12	0.38	0.79	0.41	0.062243	8.13483e-05		2.9	6.4	6.4
Pde6h	0.26	0.71	0.79	0.08	5.16524e-19	1.25815e-21	0.477886	11.9	22.6	22.6
2810454H06Rik	0.44	0.58	0.79	0.21	3.37626e-24	2.16556e-41	0.000940909	24.8	32.6	32.6
Fmod	0.24	0.52	0.79	0.27	2.16615e-08	6.09678e-17	0.00966297	11.1	17.2	17.2
Egr2	0.17	0.73	0.79	0.05	1.58282e-07	6.59254e-08		3.4	13.4	13.4
Plcd3	0.4	0.61	0.79	0.18	2.1662e-23	1.56102e-35	0.013605	22.4	28.9	28.9
Rpl39	13.85	0.48	0.78	0.3	4.85935e-193	0	1.39144e-72	99.4	99.4	99.4
Myb	1.17	0.5	0.78	0.28	4.18276e-31	2.39757e-71	2.57589e-10	53.1	57	57
Odc1	0.93	0.87	0.78	-0.09	1.94195e-73	5.70313e-54	0.123738	44.2	52.6	52.6
Cacna1g	0.18	0.28	0.78	0.5	0.00907675	9.70235e-14	4.40752e-06	9.9	12.1	12.1
Nab2	0.35	0.58	0.78	0.2	1.96482e-18	2.92142e-30	0.00895612	19.4	26.1	26.1
Fabp12	0.19	0.4	0.77	0.38	0.00210602	2.27616e-09	0.00814752	6.9	10.9	10.9
Pcdh17	0.16	0.38	0.77	0.39	0.0291158	8.86259e-06		5.3	7.4	7.4
Polg2	0.31	0.56	0.77	0.21	9.95428e-17	9.09097e-29	0.00605585	17.6	24.3	24.3
A930003A15Rik	0.18	0.51	0.77	0.26	2.04723e-05	3.8399e-10		6.3	13	13
Cox7a1	0.28	0.46	0.77	0.31	3.00351e-11	1.01645e-27	3.59207e-05	16.4	21.7	21.7
Myl9	0.84	0.72	0.77	0.05	1.35911e-47	4.41591e-51	0.421465	40.2	49.3	49.3
Atp10a	0.26	0.89	0.77	-0.12	7.00546e-17	8.70001e-12	0.406884	7.5	18.7	18.7
Ccn2	1.98	0.76	0.77	0.01	1.35152e-37	1.72984e-35	0.938274	48.8	52.2	52.2
Afap1l2	0.12	0.38	0.76	0.38	0.0329737	1.69919e-05		3.1	7.1	7.1
Arl6	0.52	0.54	0.76	0.22	2.69297e-22	1.55155e-40	0.000332789	29.8	36.2	36.2
6330403K07Rik	0.22	0.22	0.76	0.54	0.0120038	1.34685e-18	1.34776e-09	13.5	14.3	14.3
Grk1	0.28	0.46	0.76	0.3	1.49187e-07	2.20967e-17	0.00238145	13.7	17.6	17.6
Il1r1	0.35	0.59	0.76	0.17	2.46179e-16	2.57134e-24	0.0560695	18	24.3	24.3
Rpsa	7.71	0.89	0.76	-0.13	0	4.50387e-213	9.11136e-08	98.3	98.5	98.5
Wipf1	0.25	0.23	0.76	0.53	0.0510466	4.04589e-11	1.08326e-05	10.6	11.9	11.9
Lrrn3	1.15	0.46	0.75	0.29	9.98692e-24	1.04687e-59	4.22997e-10	52.5	54.7	54.7
Nxnl1	0.18	0.43	0.75	0.32	0.00108988	2.02422e-08		6.9	11	11
Lgals9	0.48	0.89	0.75	-0.14	2.41977e-48	4.52041e-31	0.0540889	24	32.9	32.9
Ahnak2	0.11	0.4	0.75	0.36	0.056896	0.000291097		1.8	5.7	5.7
Jpt1	1.13	0.9	0.75	-0.15	1.6184e-87	1.75744e-55	0.00328163	53.7	59	59
Prtn3	0.33	0.29	0.75	0.46	3.16365e-05	1.30029e-26	2.75e-10	20.5	21.5	21.5
Mboat1	0.37	0.64	0.75	0.11	7.42997e-18	2.05316e-22	0.260308	17.6	25.3	25.3
Rnaset2a	0.76	0.58	0.75	0.17	6.86387e-44	1.91033e-70	5.6591e-05	44.4	53.4	53.4
Arpc1b	0.39	0.4	0.75	0.34	1.91351e-12	5.40711e-38	1.05889e-08	23.9	28.8	28.8
Cdk1	0.21	1.44	0.75	-0.7	7.68922e-11	0.00202452	0.00607014	1.5	10.6	10.6
Pet100	1.39	0.35	0.75	0.4	3.15834e-27	4.39533e-123	1.38372e-37	66.5	70.6	70.6
Camk4	1.09	0.41	0.74	0.33	6.65105e-13	1.01981e-37	3.22954e-08	40.9	43.8	43.8
Pxdn	1.65	0.47	0.74	0.28	7.04929e-35	1.30266e-83	9.12597e-13	64.3	68.2	68.2
Smc2	0.34	1.35	0.74	-0.61	1.147e-29	6.89272e-09	3.86451e-06	9.4	17.9	17.9
Rnaset2b	0.58	0.55	0.74	0.19	1.82331e-33	3.28501e-58	3.85164e-05	37.1	44.2	44.2
Dpysl3	0.9	0.28	0.74	0.46	4.71387e-08	8.01661e-50	3.76188e-20	43.8	44.6	44.6
Dhrs3	0.6	0.27	0.74	0.47	4.46736e-06	1.76287e-39	5.27535e-17	34.9	36.1	36.1
Gucy2e	0.17	0.44	0.74	0.3	0.000812682	2.19189e-08		6.7	11.3	11.3
Actn1	0.32	0.61	0.74	0.13	2.58093e-19	6.89458e-26	0.129223	16.8	24.6	24.6
Tsen34	1.23	0.55	0.74	0.18	8.84932e-61	2.13075e-103	5.96775e-08	60.6	69.4	69.4
Snrpg	3.13	0.55	0.74	0.19	1.53341e-116	1.02966e-199	8.51792e-15	88.6	92.9	92.9
Ybx3	1.36	0.41	0.74	0.33	8.74685e-25	2.20276e-76	2.04326e-16	63.2	64.6	64.6
Arl4d	0.28	0.63	0.74	0.1	5.22251e-13	6.28277e-16	0.399434	12.4	19.6	19.6
Nr2f2	1.47	0.62	0.73	0.12	3.6971e-19	7.14764e-25	0.182995	35.3	41.9	41.9
Rplp0	10.18	0.69	0.73	0.04	6.39149e-264	5.65129e-274	0.093131	99.1	98.7	98.7
Fbxl7	0.23	0.22	0.73	0.51	0.31334	0.000505528	0.0253807	5.9	6.2	6.2
Klc3	0.21	0.49	0.73	0.24	4.10806e-09	2.20967e-17	0.0145907	10.4	18.6	18.6
Myh9	1.33	0.67	0.73	0.06	2.27324e-66	1.0592e-73	0.207528	57.6	65.5	65.5
Adamtsl4	0.31	0.34	0.73	0.38	4.34423e-07	1.80015e-26	6.25169e-08	18.6	22.5	22.5
Gadd45a	0.41	1.01	0.72	-0.29	1.45995e-45	1.60682e-21	0.000380727	18.2	29.6	29.6
Pakap.1	1.03	0.62	0.72	0.1	3.54823e-31	3.00214e-39	0.118558	40	47.2	47.2
Nusap1	0.32	1.37	0.72	-0.65	3.97174e-23	1.43102e-06	2.15417e-05	9.3	15.7	15.7
Hist1h1d	0.26	0.99	0.72	-0.26	9.84598e-16	3.11082e-08	0.080999	6.9	16.2	16.2
S100a11	2.14	0.55	0.72	0.17	9.29986e-66	7.69643e-106	5.50945e-07	77.4	80.3	80.3
Tmem258	1.82	0.42	0.72	0.3	7.34901e-52	5.29563e-147	1.04928e-27	76.9	81.5	81.5
Rasgef1b	0.41	0.64	0.72	0.08	1.16381e-18	7.63355e-22	0.404745	20.4	25.2	25.2
Rhoj	2.48	0.37	0.72	0.35	1.55386e-19	3.51881e-69	1.72262e-17	68.3	69.5	69.5
Fosb	12.32	0.69	0.72	0.02	2.86321e-111	9.42885e-109	0.659027	92.7	90.1	90.1
Igfbp7	0.31	0.05	0.72	0.67	0.676504	8.4368e-13	3.55008e-11	15.1	14.7	14.7
Ptpre	0.27	0.74	0.71	-0.02	1.80061e-14	1.12734e-12	0.902863	9.5	19.8	19.8
Klf10	0.41	0.65	0.71	0.07	2.22729e-15	5.02172e-17	0.594638	20.4	23.7	23.7
Chka	1.85	0.6	0.71	0.11	1.06944e-42	2.60586e-55	0.035397	65.3	63.8	63.8
Spint2	1.22	0.49	0.71	0.22	7.0113e-46	4.36287e-93	1.29416e-10	61.5	67.4	67.4
H1f0	1.88	1.05	0.71	-0.33	1.39713e-147	3.53812e-61	1.24864e-15	65.2	73.7	73.7
Map3k20	0.81	0.91	0.71	-0.2	7.31257e-52	4.89676e-29	0.00348061	31.7	42.9	42.9
Foxj1	0.31	0.51	0.71	0.2	3.39804e-10	3.56305e-17	0.0454189	15.8	20.6	20.6
Coq10b	1.38	0.98	0.71	-0.27	7.02888e-120	2.82063e-56	6.28655e-10	55	65.8	65.8
Siva1	0.88	0.53	0.71	0.18	1.47642e-39	3.34128e-66	3.33595e-05	51.9	56.6	56.6
Bax	1.49	0.75	0.71	-0.04	4.3066e-92	1.53303e-76	0.478393	66.2	71.4	71.4
Prrt1	0.34	0.35	0.71	0.36	3.52413e-10	3.40047e-36	8.07185e-10	23	27.1	27.1
Cntn4	0.33	0.62	0.71	0.09	2.9015e-10	4.1564e-12	0.542956	14.5	18.8	18.8
Nkain2	0.15	0.33	0.71	0.38	0.00739958	5.94733e-09		6.6	11.3	11.3
Dlgap2	0.16	0.36	0.71	0.35	0.0521819	0.000142813		5.3	6.9	6.9
Nupr1	4.3	0.27	0.71	0.44	1.05138e-13	6.76876e-85	2.50659e-33	83.8	83.7	83.7
Nek6	0.23	0.41	0.71	0.3	3.547e-07	5.73018e-18	0.000794411	12.7	18.4	18.4
Cdh13	5.13	0.25	0.71	0.46	2.37906e-07	8.77677e-50	1.62604e-21	69.3	68.7	68.7
Tll1	1.8	0.87	0.7	-0.17	7.05548e-39	1.2016e-23	0.0392655	36.7	48.2	48.2
Gpc3	1.58	0.26	0.7	0.44	8.23728e-07	2.75638e-40	3.47518e-16	48	52.4	52.4
Syt1	1.69	0.89	0.7	-0.19	1.94359e-68	1.10811e-38	0.000818906	57.4	61.2	61.2
Kif18a	0.32	1	0.69	-0.31	4.71647e-29	3.17427e-13	0.0028608	12.9	22.8	22.8
Hspb6	0.27	0.63	0.69	0.07	1.05256e-16	9.4826e-19	0.546078	14.2	21.8	21.8
Pacrg	0.79	0.99	0.69	-0.3	1.11157e-34	8.05659e-16	0.000976347	23.6	31.1	31.1
Elovl4	0.75	0.38	0.69	0.31	1.06993e-13	1.92298e-41	2.54195e-09	43	42.5	42.5
Mcm6	0.21	0.99	0.69	-0.3	7.27459e-14	1.04899e-06	0.0610348	6.7	14.4	14.4
Plec	0.66	0.32	0.69	0.37	3.85383e-11	4.61579e-49	1.24864e-15	41.2	42.3	42.3
Ube2c	0.2	1.49	0.69	-0.8	0.00031461	0.131403	0.107328	0.3	5.7	5.7
Bex2	0.36	0.44	0.69	0.25	1.1315e-10	2.52875e-23	0.000799459	21	25.9	25.9
Pcsk1n	1.15	0.17	0.69	0.52	0.000107134	1.31555e-62	5.64889e-36	55.1	54	54
Rps27l	3.56	0.75	0.69	-0.07	2.85125e-173	6.85731e-132	0.0376769	90.6	92.6	92.6
Osbp2	0.41	0.51	0.68	0.17	7.7206e-14	2.82588e-22	0.0329054	21.3	26.1	26.1
Ezr	0.62	0.45	0.68	0.23	7.04689e-21	2.22201e-44	4.51205e-06	37.2	43.5	43.5
Ier5l	0.32	0.42	0.68	0.26	2.6381e-08	4.98426e-19	0.00156312	18.2	21.9	21.9
Pcna	0.97	1.13	0.68	-0.45	1.31726e-109	1.54518e-35	1.17976e-17	48	54.1	54.1
Fcor	0.11	0.22	0.68	0.46	0.165234	6.32537e-06		5.4	6.3	6.3
Maff	0.19	0.79	0.68	-0.11	2.3972e-11	5.1595e-08	0.51741	5.7	16.7	16.7
Krt18	0.15	0.39	0.68	0.29	0.00273466	1.91991e-07		7.4	11.2	11.2
Cst3	7.18	0.32	0.68	0.35	1.13036e-59	4.05755e-248	1.29326e-69	99.3	98.9	98.9
Sfxn1	0.27	0.3	0.67	0.38	7.19721e-05	1.52922e-19	1.21552e-06	17.2	19.1	19.1
Rpl37a	18.66	0.47	0.67	0.2	6.69243e-230	0	1.51172e-39	99.7	99.7	99.7
Abcg1	0.57	-0.06	0.67	0.73	0.327896	1.00478e-42	3.13419e-49	38.2	33.5	33.5
Mns1	0.29	1.35	0.67	-0.68	1.58948e-25	1.56021e-06	1.66875e-06	7.6	17	17
Phlda1	0.26	0.83	0.67	-0.16	3.75195e-12	1.18592e-07	0.319192	8.1	17.3	17.3
Pcp2	0.29	0.48	0.67	0.19	1.59516e-16	4.95492e-29	0.00432313	18.9	25.9	25.9
Phpt1	1.36	0.43	0.67	0.24	4.55077e-44	3.93436e-102	1.32148e-14	66.1	73	73
Dpy19l1	0.63	0.11	0.67	0.55	0.045781	8.41494e-40	5.37957e-28	39.6	36.4	36.4
Tomm7	4.13	0.45	0.66	0.21	1.94983e-112	4.28684e-230	2.61025e-25	94.8	96.3	96.3
Plxdc2	2.08	0.59	0.66	0.08	4.14214e-47	9.0625e-56	0.132306	60.6	68.9	68.9
2410006H16Rik	1.39	0.5	0.66	0.17	5.68029e-42	1.17081e-70	1.53651e-05	62.6	68.1	68.1
Elk3	0.72	0.15	0.66	0.52	0.00333157	2.05314e-45	6.88862e-28	43.6	41.3	41.3
Gm12703	0.52	0.48	0.66	0.18	1.11531e-17	8.31155e-31	0.00356728	30.3	35.7	35.7
Tmsb4x	6.57	0.14	0.66	0.52	1.05753e-07	6.35115e-138	8.80188e-85	96.5	95.1	95.1
Asap1	1.51	0.34	0.66	0.33	1.37916e-15	1.64373e-55	2.83224e-14	58.3	59.7	59.7
Nop58	0.91	0.84	0.66	-0.18	1.04873e-78	5.63256e-44	0.000221576	45	55.6	55.6
Noct	0.21	0.43	0.66	0.23	2.971e-05	3.02371e-10	0.057117	10.8	14.5	14.5
Ednrb	0.47	0.22	0.66	0.44	0.000617989	3.81195e-25	1.90924e-11	27.7	27.3	27.3
Srf	0.47	0.94	0.66	-0.28	4.56983e-57	1.53948e-25	1.83524e-05	24.1	36.5	36.5
Eda2r	0.15	0.63	0.66	0.03	0.000525099	0.000515548		2.6	10.4	10.4
Selenoh	0.87	1.03	0.66	-0.37	1.79469e-88	2.04935e-32	5.28643e-12	46.3	50.4	50.4
Plppr1	0.26	0.39	0.66	0.27	0.00033582	2.37538e-09	0.0323138	12.3	14.4	14.4
Aebp1	0.07	0.32	0.66	0.33	0.178691	0.0059693		1.2	4.7	4.7
Pacsin1	0.41	0.38	0.66	0.28	5.46751e-11	3.49615e-29	6.38627e-06	25.9	29.5	29.5
Hmmr	0.23	1.53	0.66	-0.87	0.000557679	0.180141	0.09918	0.2	5.1	5.1
Gngt2	0.18	0.5	0.65	0.15	1.00555e-06	6.0596e-10		8.9	16	16
Wwc1	0.33	0.33	0.65	0.32	9.96048e-05	4.15902e-14	0.000610857	17	19.7	19.7
Pbk	0.23	1.64	0.65	-0.99	9.06978e-07	0.0802848	0.00945689	0.1	7.7	7.7
Steap4	0.16	0.33	0.65	0.32	0.0847397	0.000736838		4	7.1	7.1
1110008P14Rik	1.03	0.18	0.65	0.47	5.63036e-05	6.70497e-55	1.64039e-29	55.1	55.8	55.8
Mxra8	0.23	0.33	0.65	0.32	3.11668e-05	8.98744e-16	0.000259848	13.8	18.2	18.2
Vopp1	0.47	0.25	0.65	0.4	2.94957e-05	6.62712e-29	1.25561e-11	29	29.9	29.9
Aen	0.6	0.96	0.65	-0.31	2.27166e-67	1.18772e-27	1.59454e-07	31.2	41.3	41.3
9330188P03Rik	0.8	0.75	0.65	-0.1	3.24283e-33	6.6829e-23	0.205139	36.6	38.8	38.8
Gpx3	0.21	0.67	0.65	-0.02	1.35109e-13	7.33554e-12	0.897765	9.8	19	19
Guk1	0.89	0.24	0.65	0.41	1.54161e-08	1.47647e-58	1.01491e-24	54	54.3	54.3
Slc7a5	0.49	0.16	0.65	0.49	0.00351042	1.01505e-36	1.70082e-21	34.6	32.6	32.6
Zfp804b	23.09	0.24	0.65	0.41	1.53097e-10	2.41008e-67	1.30212e-27	94.3	92.4	92.4
Tmem200a	0.17	0.21	0.64	0.43	0.22327	0.000155105		6.3	7.5	7.5
Bicdl1	0.27	0.39	0.64	0.25	1.08972e-05	8.59589e-13	0.0112271	14.3	17.9	17.9
Csrp2	1.84	0.52	0.64	0.12	1.54493e-69	8.12769e-99	0.000166952	74.6	80	80
Ehd2	0.37	0.46	0.64	0.18	7.19718e-16	2.91659e-28	0.00410124	23.4	29.7	29.7
Samd5	0.93	0.04	0.64	0.6	0.54222	9.924e-32	1.01715e-27	42.4	38	38
Hs6st3	0.62	1.03	0.64	-0.39	8.16643e-19	2.80823e-07	0.0034701	13.6	22.6	22.6
Tubb6	0.22	1.3	0.64	-0.66	1.37384e-15	0.000275016	0.000307678	3.2	14.1	14.1
Eef1a1	24.89	0.67	0.64	-0.03	0	2.80904e-289	0.128585	99.8	99.8	99.8
Plat	1.88	0.58	0.64	0.06	2.47724e-39	5.97193e-44	0.335604	60.7	66.4	66.4
Gamt	0.46	0.2	0.64	0.44	0.000265911	1.26528e-33	1.96481e-16	33.1	32.2	32.2
Gm48236	0.15	0.37	0.64	0.27	0.0196677	7.40231e-05		6.1	9.1	9.1
Kitl	0.15	0.38	0.64	0.26	0.032409	0.000316368		5.4	7.2	7.2
Knl1	0.21	1.34	0.64	-0.71	5.94732e-06	0.0515466	0.0432247	1.9	7.1	7.1
Rp1l1	0.17	0.37	0.64	0.27	0.00716854	4.2457e-06		7.2	10.4	10.4
Cks1b	0.28	1.01	0.64	-0.37	2.8388e-26	3.87829e-10	0.000525581	12.5	19.9	19.9
Cdca3	0.19	1.27	0.64	-0.63	0.000300805	0.0997009	0.139899	0.6	6.5	6.5
Sik1	0.27	0.74	0.64	-0.1	1.91802e-14	3.98856e-10	0.451448	10.8	19.7	19.7
Slc29a1	0.47	0.39	0.63	0.24	4.45624e-14	8.6571e-34	8.06611e-06	31.3	34.2	34.2
Cnn2	0.18	0.46	0.63	0.18	0.000158619	3.41028e-07		7.8	13.4	13.4
Snrpf	2.06	0.52	0.63	0.12	5.4396e-77	3.58817e-109	7.44634e-05	80.2	84.9	84.9
C1qtnf12	0.63	0.36	0.63	0.28	1.82808e-15	6.66727e-46	5.24402e-10	41.6	45.5	45.5
Ssr2	1.05	0.6	0.63	0.04	4.28194e-65	6.17508e-68	0.44508	57.5	67.5	67.5
Olfm1	0.51	0.43	0.63	0.2	2.07652e-16	1.00744e-31	0.000617109	32	36.8	36.8
Ahnak	1.45	0.4	0.63	0.23	3.88451e-28	7.44532e-65	1.73106e-09	64.9	66.5	66.5
Gm29683	1.27	0.51	0.63	0.12	3.95542e-08	6.70708e-11	0.357173	23.6	30.3	30.3
Plekhf1	0.15	0.44	0.63	0.19	0.000103314	5.41855e-08		7.4	13.7	13.7
Ccdc126	0.24	0.42	0.63	0.21	1.43908e-06	1.96898e-12	0.043442	13.4	17.7	17.7
Stac2	1.49	0.3	0.63	0.33	2.51201e-18	1.73313e-75	1.16418e-21	67.6	68.6	68.6
Ggta1	0.07	0.35	0.62	0.28	0.158908	0.012064		1	5	5
Cabp4	0.16	0.36	0.62	0.26	0.00815319	6.95994e-06		6.7	11	11
Mir124-2hg	0.72	0.31	0.62	0.32	1.63564e-08	4.42198e-31	7.2902e-09	40.4	40.3	40.3
Rgs9bp	0.2	0.35	0.62	0.27	0.00127836	1.49994e-08	0.0285385	10.8	13.9	13.9
Tgif1	0.4	0.45	0.62	0.17	6.36338e-17	1.22022e-28	0.00751691	26.3	31.1	31.1
Ptgds	1.77	0.93	0.62	-0.31	6.52587e-115	5.11145e-46	4.44392e-13	61.9	70.5	70.5
Irs2	0.26	0.42	0.62	0.2	8.34766e-08	7.45207e-15	0.0255429	15.4	19.1	19.1
Lgals1	1.58	0.32	0.62	0.3	1.48133e-17	1.35311e-62	6.68611e-16	66.9	68.1	68.1
Dbndd2	0.33	0.34	0.62	0.28	4.41663e-09	2.05288e-26	4.21402e-06	23.1	26.1	26.1
Tshz2	4.31	0.26	0.62	0.36	3.58102e-09	7.80226e-45	1.16694e-15	66.9	70.5	70.5
Mlf1	0.19	0.78	0.62	-0.16	2.77122e-10	2.21404e-06	0.337188	5.6	16.3	16.3
Cds1	0.16	0.44	0.62	0.18	0.000586829	1.87509e-06		7.3	11.9	11.9
Dut	0.83	0.84	0.62	-0.22	7.97516e-65	1.83278e-31	2.55498e-05	46.5	50.1	50.1
S100a10	4.84	0.61	0.62	0.01	1.36556e-108	2.40621e-102	0.88571	94.7	94.4	94.4
Dctpp1	0.26	0.62	0.62	0	3.76924e-17	1.02899e-15	0.98738	16.6	22.5	22.5
Hirip3	0.44	0.95	0.62	-0.33	3.21648e-47	2.64703e-18	4.13923e-06	23.5	30.8	30.8
Lrrfip1	1.81	0.42	0.62	0.2	1.21384e-34	7.25418e-70	4.70341e-08	70.5	73.1	73.1
Col4a1	0.19	0.4	0.62	0.22	5.64871e-05	8.80803e-10	0.0600761	10.7	15.9	15.9
Cdca8	0.21	1.36	0.62	-0.74	5.74945e-06	0.0629298	0.0340827	1.3	7.2	7.2
Xylt1	0.21	0.61	0.62	0.01	7.30471e-07	1.69784e-06	0.980624	7.8	13.3	13.3
Rpl38	19.15	0.33	0.62	0.29	4.93828e-117	0	5.91186e-85	99.9	99.6	99.6
Igsf3	0.35	0.34	0.61	0.27	1.02006e-08	1.19185e-24	1.35973e-05	23.8	26.7	26.7
Kif22	0.23	0.78	0.61	-0.17	1.14768e-13	4.26501e-08	0.213732	10.3	16.3	16.3
Mpp4	0.24	0.43	0.61	0.18	8.25951e-07	7.01235e-12	0.0811163	13.2	17.6	17.6
Mgst1	1.68	0.29	0.61	0.32	1.53214e-19	2.2552e-82	5.48926e-24	70.5	73.8	73.8
Man1a	0.24	0.24	0.61	0.37	0.104622	1.82066e-05	0.0163939	9.6	10.1	10.1
Mcub	0.14	0.35	0.61	0.26	0.0107907	9.80371e-06		6.8	10.1	10.1
Gm17501	0.23	0.72	0.61	-0.11	1.05958e-14	6.36204e-10	0.379513	9.7	20.8	20.8
Osbpl3	2.12	0.43	0.61	0.18	1.25891e-37	1.22824e-70	4.55677e-07	73.4	77	77
Sncb	0.4	0.4	0.61	0.2	5.32821e-13	2.62479e-26	0.00105148	27.4	30.8	30.8
Ect2	0.2	1.32	0.61	-0.71	6.94837e-06	0.061511	0.0383985	1	7.6	7.6
Parvb	0.32	0.14	0.61	0.47	0.0476865	2.11593e-19	1.06036e-11	21.9	20.4	20.4
Stom	0.51	1.15	0.61	-0.54	1.3644e-74	6.66785e-19	5.6972e-16	25.5	34.2	34.2
Nsun7	0.4	0.36	0.61	0.25	2.18052e-07	2.68205e-18	0.000817976	22.8	25.6	25.6
Bhlhe40	1.61	0.67	0.61	-0.06	1.16168e-42	3.49174e-32	0.337502	58.6	57.2	57.2
Tmsb15b1	0.32	0.25	0.61	0.36	6.12524e-05	2.38695e-23	9.71664e-09	23	23.5	23.5
Cda	0.18	0.25	0.61	0.35	0.0118973	9.21686e-10	0.000820253	12.1	13.3	13.3
Atp5mpl	3.27	0.37	0.61	0.23	1.01326e-64	6.73951e-164	3.45712e-26	91.6	93.1	93.1
Tlr4	0.15	0.3	0.61	0.3	0.02359	5.59696e-06		7.6	9.9	9.9
Ap3b2	0.36	0.01	0.61	0.59	0.868423	5.86993e-17	4.26905e-16	22.6	19.8	19.8
Jun	26.75	0.64	0.61	-0.03	1.65333e-152	2.68703e-126	0.343932	98.7	97.5	97.5
Klhl23	0.3	0.5	0.6	0.1	3.31293e-13	2.0031e-17	0.250394	18	23.9	23.9
Prss23	1.32	0.22	0.6	0.38	2.9051e-09	1.59705e-61	2.80564e-25	65.1	65	65
Wdr35	0.9	0.46	0.6	0.14	3.73312e-23	8.4309e-37	0.0062659	44.4	50.6	50.6
Slc6a6	2.38	0.3	0.6	0.3	5.41555e-19	1.15988e-71	4.00463e-19	80.9	79.1	79.1
Rab31	0.6	0.46	0.6	0.14	2.52099e-15	1.41814e-23	0.0435205	31.9	37.1	37.1
Cpe	4.53	0.13	0.6	0.47	1.51563e-08	1.06105e-166	3.2656e-103	95.5	93.7	93.7
Lama3	0.97	0.98	0.6	-0.38	1.0562e-83	1.95667e-28	9.61141e-13	36.8	54.9	54.9
Ost4	4.15	0.29	0.6	0.31	6.82988e-55	1.05636e-228	7.16685e-64	95.2	95.5	95.5
Fam129a	0.11	0.35	0.6	0.25	0.123435	0.0094442		2.7	5.6	5.6
Kif11	0.24	1.22	0.6	-0.62	5.1096e-11	0.00302834	0.00339804	5.5	11.2	11.2
Kcnj14	0.15	0.39	0.6	0.21	0.00643172	3.24904e-05		6.5	10.4	10.4
Lrmda	2.04	0.66	0.6	-0.06	3.65451e-16	1.6796e-12	0.624272	32.7	38.3	38.3
Cbx4	1.01	0.35	0.6	0.25	3.41821e-14	2.85274e-39	6.61712e-08	51.3	53.1	53.1
Ankrd33b	0.16	0.35	0.6	0.25	0.0244413	0.00015419		6.1	8.8	8.8
Fosl1	0.22	0.96	0.6	-0.36	5.40999e-07	0.00382792	0.126287	3	10.8	10.8
Cacna2d4	0.22	0.37	0.6	0.23	0.000377575	1.73973e-08	0.0648517	10.7	13.9	13.9
Tpt1	40.49	0.45	0.6	0.15	1.16781e-165	4.85381e-267	1.03273e-16	99.9	99.8	99.8
Pttg1	0.79	0.84	0.6	-0.24	2.2927e-60	8.75574e-28	1.30074e-05	44.4	45.1	45.1
Plcl1	0.97	0.53	0.6	0.07	2.88683e-13	1.76525e-15	0.509276	30	37.1	37.1
Katnal2	0.37	0.72	0.6	-0.12	8.84199e-19	3.28032e-12	0.262278	16.4	23.2	23.2
Cdc20	0.26	1.67	0.6	-1.07	2.18052e-07	0.099718	0.00301748	0.6	7.6	7.6
Rps27	23.39	0.4	0.6	0.19	6.10791e-174	0	2.14998e-39	99.8	99.8	99.8
Syp	0.36	0.38	0.59	0.22	3.78593e-10	3.45759e-22	0.00109228	23.5	27	27
Tmem107	0.22	0.57	0.59	0.02	4.04747e-13	6.08209e-13	0.884418	12	20.7	20.7
Neat1	1.46	1.16	0.59	-0.57	7.45916e-96	1.4325e-22	1.28942e-22	45.4	56.1	56.1
Itpr1	0.76	0.24	0.59	0.36	0.000101532	3.09051e-23	6.48112e-09	38.1	35.1	35.1
Pabpc1	2.37	0.5	0.59	0.09	8.30797e-71	1.06828e-90	0.0068627	81.7	85.2	85.2
Kif23	0.14	1.07	0.59	-0.48	0.0113951	0.197886		0.2	5.2	5.2
A530013C23Rik	0.1	0.39	0.59	0.2	0.0274581	0.000983112		3.4	8.5	8.5
Hells	0.19	1.07	0.59	-0.48	8.09343e-10	0.00184343	0.0176384	4.9	11.6	11.6
Lrrc2	0.1	0.36	0.59	0.23	0.140992	0.0181996		2.3	5.5	5.5
Chst9	0.85	0.38	0.59	0.21	0.000354342	3.66767e-08	0.0892748	21.8	23.8	23.8
Ifitm10	0.07	0.33	0.59	0.26	0.168485	0.0155168		1.5	4.8	4.8
Emb	0.63	0.28	0.59	0.31	1.16061e-06	7.89158e-26	4.92232e-08	35.4	36.3	36.3
Eml1	0.35	0.39	0.59	0.2	1.37112e-08	9.14281e-17	0.013783	20.2	23.9	23.9
Cenpa	0.33	1.48	0.59	-0.89	1.17401e-21	0.000520511	1.16023e-07	8.9	12.2	12.2
Nmt1	1.34	0.48	0.59	0.1	8.39131e-50	2.89271e-69	0.0033695	65	72.7	72.7
Cpt1c	1.01	0.64	0.59	-0.06	5.73179e-59	7.00777e-45	0.27738	53.2	60.5	60.5
Pkig	0.95	0.4	0.59	0.19	5.85152e-21	1.64646e-42	2.46327e-05	51.6	54.9	54.9
Ankrd33	0.09	0.32	0.59	0.27	0.133555	0.00589807		2.7	5.9	5.9
Fbn1	0.65	-0.11	0.59	0.69	0.120036	7.83607e-21	4.62896e-28	33.7	29.9	29.9
Arntl2	0.11	0.27	0.59	0.32	0.109131	0.000439832		5.5	7.5	7.5
Tmem179b	0.5	0.27	0.58	0.32	2.97641e-08	1.03499e-34	4.77416e-11	35.8	37.6	37.6
Ckap4	2.22	0.42	0.58	0.17	5.87413e-48	4.5889e-89	1.79881e-08	80.7	81.2	81.2
Itga2b	0.19	0.5	0.58	0.09	5.8941e-08	8.19004e-10	0.513649	10.7	17.7	17.7
Kcnd3	0.27	0.15	0.58	0.44	0.229946	6.80417e-07	0.000412349	12.6	12.7	12.7
Nsa2	1.47	0.43	0.58	0.15	2.15507e-37	3.28146e-64	2.38529e-05	67.2	71.2	71.2
Mylip	0.74	0.18	0.58	0.4	0.000808342	7.08402e-29	4.41928e-14	40.7	40.5	40.5
Gria1	0.11	0.25	0.58	0.33	0.19528	0.00236202		5.2	6.7	6.7
Smad3	1.16	0.21	0.58	0.37	2.13756e-05	2.11138e-34	1.11154e-14	52.3	51.6	51.6
Myl12a	1.71	0.56	0.58	0.02	3.55051e-70	3.38594e-70	0.632552	72.5	78.4	78.4
Mcm4	0.26	0.89	0.58	-0.31	8.73221e-27	5.41725e-11	0.00107386	13.8	22.8	22.8
Sapcd1	0.53	0.28	0.58	0.3	2.21482e-07	6.13513e-28	2.12848e-08	36.1	35	35
Tafa1	3.2	0.34	0.58	0.24	7.58283e-09	1.15315e-22	0.000120668	54.8	56.5	56.5
Fat1	1.16	0.49	0.58	0.08	4.71922e-35	1.23286e-44	0.0794318	57.5	61.3	61.3
Tbc1d1	0.19	0.42	0.58	0.16	0.000414272	1.65836e-06	0.28799	9.2	13.6	13.6
Pdrg1	0.98	0.24	0.58	0.34	3.47765e-10	6.33769e-57	4.66739e-21	58.1	60.2	60.2
Fcgrt	0.73	0.39	0.58	0.19	4.77141e-20	1.83914e-41	1.83312e-05	45.7	50.5	50.5
Bmp1	0.73	0.1	0.58	0.47	0.0420591	1.0794e-34	2.18475e-23	43.7	41.9	41.9
Slc43a2	0.34	0.34	0.58	0.24	1.6266e-06	5.68281e-16	0.00199839	20.7	23.2	23.2
Birc5	0.16	1.16	0.58	-0.58	0.00138528	0.147349		0.6	6.3	6.3
Ifngr2	0.4	0.36	0.58	0.21	3.32764e-12	1.41939e-27	0.000149849	27.8	32	32
Slc41a2	0.14	0.38	0.58	0.2	0.0135198	0.000189419		6	9.7	9.7
Csmd3	0.15	0.32	0.57	0.26	0.0375341	0.000162238		8.2	10.2	10.2
Ano2	0.31	0.51	0.57	0.07	8.4641e-13	8.26733e-15	0.53314	16.7	22.9	22.9
Casp8	0.34	0.45	0.57	0.12	1.13943e-09	6.34016e-14	0.19784	20.5	24	24
Homer1	0.64	0.43	0.57	0.15	3.21804e-10	1.44142e-16	0.0669073	33.9	33.3	33.3
Mfap2	0.75	-0.11	0.57	0.68	0.0300911	1.27832e-40	6.35303e-54	49.6	41.5	41.5
Sgk1	0.18	0.49	0.57	0.09	6.54922e-05	5.83008e-06	0.639297	8	14.2	14.2
Dnajb1	0.79	0.82	0.57	-0.25	2.16348e-44	5.58007e-20	0.000138574	34.9	43.3	43.3
Tex14	0.66	0.75	0.57	-0.18	1.69589e-37	5.81356e-20	0.0077279	30.8	39.6	39.6
Camkk2	0.24	0.38	0.57	0.19	8.34818e-06	5.88008e-11	0.0597333	14	17.9	17.9
Vldlr	0.22	0.27	0.57	0.31	0.00847656	1.21218e-08	0.00511267	13.5	14.3	14.3
Anln	0.26	1.01	0.57	-0.44	4.71488e-18	5.94606e-06	0.000812388	10.3	17.1	17.1
Btg1	5.59	0.4	0.57	0.17	7.68979e-68	3.00373e-126	9.55663e-12	96.5	95.4	95.4
Emd	0.8	0.67	0.57	-0.1	2.56376e-47	1.85122e-31	0.0795088	46.5	51.7	51.7
Tnfaip6	1.12	0.71	0.57	-0.14	5.43363e-33	9.57751e-20	0.0506483	42.9	47.2	47.2
Kcne1l	0.84	0.39	0.57	0.18	2.46091e-17	4.52733e-34	0.000299095	46.4	49.8	49.8
Ubap1l	0.14	0.34	0.57	0.23	0.0213297	0.000126936		6.9	10.1	10.1
Mir670hg	0.39	0.15	0.57	0.42	0.0452814	1.69011e-16	1.93393e-09	24.6	23.1	23.1
Timp3	17.7	0.48	0.57	0.09	3.06293e-86	3.49135e-111	0.00168701	99.5	98.4	98.4
Spidr	2.16	0.7	0.57	-0.13	5.15893e-72	5.97193e-44	0.00411917	65.3	73.3	73.3
Tmsb15b2	0.54	0.38	0.57	0.19	1.35405e-15	4.13058e-32	0.000195972	36.1	40.2	40.2
Cavin1	0.46	0.33	0.57	0.23	2.00584e-10	8.08303e-27	2.51597e-05	31.7	34.1	34.1
Fam216a	0.65	0.63	0.57	-0.06	3.63674e-39	2.26391e-29	0.358141	40.5	46.2	46.2
Rps29	32.85	0.34	0.57	0.23	6.6821e-150	0	1.21348e-66	99.8	99.7	99.7
Ddost	1.22	0.54	0.57	0.03	1.47028e-59	2.19151e-61	0.52461	64.4	70.7	70.7
Rps21	20.9	0.39	0.57	0.18	3.55119e-169	0	2.45631e-35	99.8	99.6	99.6
Fscn2	0.11	0.39	0.56	0.18	0.0337759	0.00233008		3.6	8.3	8.3
Traf5	0.28	0.5	0.56	0.07	1.11402e-14	2.99465e-17	0.461135	17.3	25.4	25.4
Sept9	0.54	0.16	0.56	0.41	0.00303736	2.1898e-29	7.58271e-16	38.1	35.4	35.4
Adipor1	1.2	0.28	0.56	0.29	4.69317e-14	8.85295e-54	9.02916e-15	63.1	64.4	64.4
Meis2	1.04	0.25	0.56	0.31	6.93237e-05	2.43993e-19	1.94896e-06	39.8	39.5	39.5
Il13ra1	0.07	0.29	0.56	0.27	0.271787	0.0356926		1.8	3.9	3.9
Litaf	0.59	0.29	0.56	0.27	3.80699e-08	2.32331e-27	2.41503e-07	36.9	38.5	38.5
Rtn2	0.2	0.35	0.56	0.21	1.12167e-05	6.15833e-12	0.0233211	13.8	18	18
Mpp6	0.78	0.2	0.56	0.36	0.000382119	1.38897e-24	1.3169e-10	41.6	40.1	40.1
Snrpe	2.27	0.38	0.56	0.18	3.3019e-48	3.28107e-101	3.91094e-12	86	86.2	86.2
Snhg9	0.74	0.88	0.56	-0.32	1.51886e-93	1.52108e-32	1.65466e-13	41.7	56.5	56.5
Rpl35a	15.6	0.46	0.56	0.1	3.4478e-198	3.61024e-276	2.52989e-10	99.6	99.4	99.4
Smim27	0.99	0.32	0.56	0.23	2.00812e-17	7.00965e-49	1.04628e-09	55.9	58.7	58.7
R3hdm4	0.8	0.3	0.56	0.26	6.06006e-14	1.31494e-44	1.64193e-10	50.3	53.5	53.5
Myo10	0.19	0.38	0.56	0.18	0.00044985	4.19497e-07	0.183244	10.4	13.7	13.7
Nemp1	0.43	0.6	0.55	-0.05	9.26698e-24	2.10642e-18	0.574669	25.9	31.4	31.4
Trim17	0.37	0.49	0.55	0.07	1.17446e-09	2.31802e-11	0.561191	20.5	22.8	22.8
Cdh23	0.36	0.05	0.55	0.51	0.595491	4.6372e-11	3.305e-09	20.9	17.9	17.9
Gm20515	0.2	0.37	0.55	0.19	7.8901e-05	5.83852e-09	0.0972534	12.2	16.3	16.3
Apoe	236.29	0.22	0.55	0.34	1.81635e-57	0	4.27208e-126	100	100	100
Samd11	0.19	0.33	0.55	0.22	0.0055085	4.72875e-06	0.119833	9.8	12.2	12.2
Cdk2ap2	0.72	0.47	0.55	0.08	2.048e-26	3.71768e-33	0.155416	44	49.1	49.1
Cdr2	0.13	0.35	0.55	0.2	0.0282397	0.00067882		5.3	9	9
Cetn4	0.43	0.47	0.55	0.08	1.21612e-18	3.09566e-23	0.258743	28.8	33.9	33.9
Frmd8	0.3	0.37	0.55	0.18	1.76343e-09	1.78402e-18	0.0096964	20.8	24.8	24.8
Cetn2	1.02	0.56	0.55	-0.01	2.21023e-44	8.08662e-40	0.923379	55	59.9	59.9
Mcm7	0.33	0.94	0.55	-0.39	2.99996e-36	7.09416e-12	2.09728e-06	18.3	25.7	25.7
Pacsin2	0.28	0.41	0.55	0.14	2.67655e-08	2.57337e-13	0.110878	17.2	21.5	21.5
Pcbd1	0.2	0.28	0.55	0.26	0.000716546	9.38253e-11	0.00446641	14	16.2	16.2
Taf11	0.45	0.53	0.55	0.02	1.40025e-27	7.35208e-27	0.844756	29.9	37.7	37.7
Casz1	1.99	0.28	0.55	0.27	2.94851e-17	5.64924e-62	7.64134e-16	75	75.2	75.2
Chl1	4.93	0.53	0.55	0.02	7.22657e-76	1.79586e-75	0.640715	88.6	91.3	91.3
Prdx4	1.76	0.64	0.55	-0.1	2.16448e-91	3.79991e-60	0.00826672	76.4	80.1	80.1
Cd44	3.82	0.3	0.55	0.25	1.46264e-25	1.65486e-80	1.08936e-17	89.7	88.5	88.5
Rnasel	0.11	0.25	0.55	0.3	0.120231	0.000638566		6	7.6	7.6
Sec61g	4.23	0.32	0.55	0.23	5.27353e-53	1.47335e-150	3.12582e-28	96.1	95.4	95.4
Zfp36l2	6.51	0.42	0.54	0.13	2.11649e-53	5.90287e-84	2.08799e-05	95.3	95.5	95.5
Mvp	0.56	0.25	0.54	0.29	3.47545e-06	2.66e-24	9.60698e-08	35.4	36.6	36.6
Actb	25.74	0.55	0.54	0	1.85413e-186	7.92038e-170	0.948936	99.6	99.5	99.5
Lgmn	0.76	0.24	0.54	0.31	2.01844e-08	6.78328e-40	1.23e-13	49	50	50
Rnase4	0.26	0.44	0.54	0.11	9.79671e-10	1.89306e-13	0.257099	16.1	21.8	21.8
Ezh2	1.42	1.06	0.54	-0.52	9.28503e-115	8.33655e-27	5.89209e-27	55.9	62.4	62.4
Bcl6	2.12	0.6	0.54	-0.05	1.71609e-66	1.72251e-50	0.236747	73	77.7	77.7
Eif2s3x	0.95	0.87	0.54	-0.32	3.14301e-114	8.99435e-39	6.00946e-17	49.2	65.9	65.9
Tgfbr1	1.15	0.34	0.54	0.2	3.10064e-14	7.42434e-33	2.50311e-05	53	55.7	55.7
Lrit2	0.11	0.34	0.54	0.2	0.0602295	0.00317792		4.1	8	8
Dusp1	2.62	0.8	0.54	-0.26	5.49445e-66	9.85246e-28	3.06831e-07	63.7	68.8	68.8
Rasa3	0.8	0.37	0.54	0.17	5.55062e-15	6.83123e-30	0.000590267	45.6	47.6	47.6
Cd151	0.98	0.23	0.54	0.31	1.31636e-09	1.422e-46	8.31835e-16	57.8	57.6	57.6
Slc44a1	0.84	0.21	0.54	0.33	1.05658e-05	1.60819e-30	8.16837e-12	45.8	46.4	46.4
Ldha	2.98	0.44	0.54	0.1	1.92404e-59	2.97526e-84	0.00061471	87.1	89.9	89.9
Rps2	9.53	0.47	0.54	0.07	1.59251e-148	5.24761e-182	0.000523665	99.6	99.2	99.2
Cebpd	10.46	0.9	0.54	-0.36	4.01072e-138	8.37545e-46	4.02209e-21	94.9	94.2	94.2
9330179D12Rik	0.13	0.14	0.54	0.4	0.366935	0.000464273		8	6.2	6.2
Larp7	1.03	0.61	0.54	-0.07	7.92206e-48	4.80957e-34	0.177336	51.9	58	58
Shtn1	0.24	0.26	0.54	0.28	0.0150083	3.59191e-07	0.0167711	13.1	13.7	13.7
Rara	0.65	0.21	0.54	0.33	1.03486e-05	1.83394e-32	4.5631e-13	44.5	43	43
Pebp1	7.09	0.28	0.54	0.26	1.00896e-62	3.09803e-229	1.06464e-56	99.1	98.6	98.6
Mbnl1	1.79	0.34	0.54	0.2	7.92027e-23	6.13787e-54	2.32273e-08	70.9	73.4	73.4
Hcn1	0.98	0.53	0.54	0	8.36812e-13	6.6106e-12	0.992874	37.5	29.8	29.8
Rfx2	0.37	0.63	0.54	-0.09	8.67077e-21	3.42634e-14	0.317728	19.9	26.9	26.9
Synpo	0.24	0.34	0.54	0.19	1.73999e-05	4.11054e-11	0.0370253	15	19	19
Npdc1	1.22	0.35	0.54	0.19	8.11664e-27	1.85442e-59	3.10368e-08	65.8	68.4	68.4
Col4a2	0.36	0.33	0.53	0.21	5.51884e-07	7.65311e-16	0.00435818	22.4	25.3	25.3
Rpgrip1	0.82	0.39	0.53	0.15	2.75532e-11	2.73366e-19	0.0290505	40.3	39.4	39.4
Zcchc24	1.79	0.34	0.53	0.19	3.26563e-25	7.06163e-58	1.66684e-08	72.9	74.9	74.9
Car10	0.19	0.38	0.53	0.16	4.13597e-05	1.15195e-08	0.16052	12.3	17.7	17.7
Rell1	0.17	0.36	0.53	0.17	0.0018576	5.74195e-06		9.6	12.7	12.7
Adgrb3	3.08	0.54	0.53	-0.01	4.70723e-22	1.13696e-19	0.924506	53.6	61.9	61.9
Hprt	0.78	0.33	0.53	0.2	4.45526e-15	2.09821e-36	3.17601e-06	48.7	50.6	50.6
Crybb3	0.21	0.35	0.53	0.18	0.0002202	3.57273e-08	0.110814	12.8	16.2	16.2
Frmpd1	0.34	0.5	0.53	0.03	1.25763e-11	6.94329e-12	0.826437	17.8	23.8	23.8
Gas2l3	0.21	0.87	0.53	-0.33	1.93112e-10	0.000276263	0.0397611	7.8	13.7	13.7
Tuft1	0.19	0.44	0.53	0.1	3.23226e-05	8.71137e-07	0.51663	10.5	15.7	15.7
Pitpnm2os2	0.12	0.37	0.53	0.16	0.024669	0.00171626		4.6	9	9
Lyar	0.59	0.39	0.53	0.14	4.2978e-15	3.3914e-25	0.0143467	38.2	41.6	41.6
Trim59	0.32	1.17	0.53	-0.64	7.39444e-35	2.7761e-07	4.00017e-10	13	22.4	22.4
Rd3	0.09	0.31	0.53	0.22	0.113798	0.00651393		3.7	6.9	6.9
Col9a3	1.22	0.26	0.53	0.27	2.58537e-12	4.74174e-46	1.45843e-12	62.9	62.3	62.3
Ctnna2	0.32	0.72	0.53	-0.19	1.3307e-13	3.30746e-07	0.114351	14.9	19	19
Lsm2	0.4	0.8	0.53	-0.27	2.43201e-42	2.72602e-17	3.91123e-05	25.9	32.8	32.8
Tent5a	0.27	0.6	0.53	-0.07	6.2709e-10	1.68488e-07	0.657595	13	18.1	18.1
Il17rd	0.47	0.26	0.53	0.27	2.58635e-05	9.91916e-18	3.40593e-05	28.3	30.4	30.4
Frmd3	0.34	0.35	0.53	0.18	5.15775e-05	2.44724e-09	0.0889978	17.3	20	20
Ivns1abp	0.32	0.4	0.53	0.13	4.46069e-11	3.06408e-17	0.0832997	22.7	26	26
Cox6b2	2.46	1	0.53	-0.47	1.26383e-152	4.12131e-38	4.75098e-33	76.1	78.8	78.8
Ccnb1	0.19	1.32	0.53	-0.79	0.00125122	0.241437	0.10521	0.2	5.9	5.9
Dcun1d3	0.65	0.73	0.53	-0.2	7.96389e-42	3.95207e-20	0.000838076	35.4	42.4	42.4
Pdyn	0.51	0.25	0.53	0.28	0.000564683	1.83188e-13	0.00024775	27.4	28.4	28.4
E2f1	0.27	0.62	0.53	-0.09	5.66377e-16	4.13235e-11	0.413327	17.1	21.6	21.6
Hivep2	2.91	0.18	0.53	0.35	3.57208e-06	4.93326e-45	2.74594e-20	74.9	73.5	73.5
Lrriq1	0.21	0.7	0.53	-0.17	3.93743e-06	0.00102671	0.414606	5.7	12.7	12.7
Wee1	0.53	0.84	0.53	-0.31	2.97696e-40	9.71022e-15	6.45122e-06	30.7	33.4	33.4
Mrps6	0.78	0.46	0.53	0.06	3.88624e-23	1.48265e-27	0.30421	46.6	48.3	48.3
Sdc3	0.09	0.32	0.53	0.2	0.0731304	0.00402061		4	7.8	7.8
Zic1	0.37	0.43	0.53	0.1	6.34725e-08	1.05097e-10	0.348338	20	24	24
Stxbp6	1.76	0.41	0.52	0.12	1.29837e-13	2.18339e-20	0.0810746	47.1	53.5	53.5
Arhgap24	0.2	0.38	0.52	0.15	0.00198858	2.89956e-05	0.366949	10.4	12.8	12.8
A930006I01Rik	0.1	0.33	0.52	0.2	0.119114	0.0132523		3.4	6.5	6.5
Tmco1	2.72	0.37	0.52	0.15	3.85549e-58	6.96715e-108	4.69021e-10	89.5	90.1	90.1
Rpl34	13.83	0.39	0.52	0.13	4.19146e-144	1.99208e-238	6.02135e-16	99.7	99.3	99.3
Rbm3	2.09	0.48	0.52	0.04	5.84864e-48	7.05333e-53	0.319192	79.7	77.8	77.8
Rpl22	8.23	0.42	0.52	0.1	2.64811e-126	8.70811e-183	3.61822e-08	98.7	98.7	98.7
Lsm7	1	0.38	0.52	0.14	1.45938e-26	2.87516e-46	0.000302462	58.2	63.6	63.6
Gpx1	0.84	0.14	0.52	0.38	0.000981566	1.55361e-39	1.3516e-21	51.9	52.2	52.2
Tpbg	0.28	0.24	0.52	0.28	0.000333378	1.35095e-14	0.000108155	20.3	21.3	21.3
Slc27a6	0.17	0.24	0.52	0.28	0.0562249	2.11766e-05		10.3	11.5	11.5
Prr5l	1.85	0.38	0.52	0.14	1.70069e-25	2.36569e-44	0.000435008	68.8	72.1	72.1
Thsd7a	2.77	-0.21	0.52	0.72	0.000205147	2.58253e-21	5.03984e-40	56.2	52.7	52.7
Gnb4	0.08	0.34	0.52	0.17	0.149325	0.0331099		2.2	5.8	5.8
Tbx3	0.29	0.53	0.52	-0.01	1.73891e-11	3.80214e-10	0.924378	16	21.5	21.5
Frat2	0.33	0.86	0.52	-0.34	1.73312e-31	4.70391e-11	3.16587e-05	18	26.1	26.1
Apol9a	0.11	0.34	0.52	0.17	0.0523489	0.00412905		5.1	7.7	7.7
Iah1	0.41	0.28	0.52	0.23	1.03106e-07	3.3842e-22	2.87078e-05	29.5	31.5	31.5
Pofut2	0.53	0.32	0.52	0.19	8.82126e-12	4.45767e-27	0.000129283	37	40.3	40.3
Pcolce	0.12	0.3	0.52	0.22	0.0348273	0.000251732		7.2	10.1	10.1
Cyb5r3	0.7	0.28	0.52	0.23	9.65336e-11	6.21724e-33	9.95282e-08	47	47.6	47.6
Midn	1.26	0.38	0.52	0.14	1.82751e-21	3.49671e-37	0.00152044	60.9	61.5	61.5
Susd3	0.11	0.36	0.52	0.15	0.053427	0.0071108		3.6	8.1	8.1
Mms22l	0.19	0.87	0.51	-0.36	2.62252e-08	0.00234551	0.0577741	6.5	12	12
Crip2	4.17	0.37	0.51	0.15	1.77873e-64	2.07564e-119	5.45749e-11	95.1	94.9	94.9
Tmem136	0.27	0.35	0.51	0.16	5.40999e-07	5.94247e-13	0.0455987	18	21.5	21.5
Rpl10a	7.41	0.41	0.51	0.1	3.84702e-110	3.87017e-158	5.53088e-07	99.1	98.8	98.8
Arr3	0.22	0.58	0.51	-0.07	3.09533e-14	1.80305e-10	0.548121	12.7	22.1	22.1
C1qbp	0.66	0.51	0.51	0	1.76399e-31	1.04142e-28	0.987354	42	49.4	49.4
Hist1h2an	0.13	0.81	0.51	-0.29	0.00114004	0.0565061		2.8	7.3	7.3
Rpl9-ps6	0.27	0.59	0.51	-0.08	3.91428e-23	2.64017e-16	0.348514	17.3	27.6	27.6
Psrc1	0.12	0.77	0.51	-0.26	0.00209082	0.0582357		0.6	9.4	9.4
Rack1	5.88	0.56	0.51	-0.05	6.0711e-165	4.42617e-126	0.0543859	97.7	98	98
Snhg1	0.63	0.59	0.51	-0.08	5.29098e-33	1.95988e-22	0.195056	38.4	43.6	43.6
Ftl1-ps1	0.17	0.37	0.51	0.14	0.000138637	2.36072e-07		10.7	15.7	15.7
Zmat3	0.48	0.4	0.51	0.11	2.05992e-12	2.74772e-18	0.109939	31.3	33.9	33.9
Entpd2	0.44	0.41	0.51	0.1	1.01135e-15	1.8341e-22	0.093853	30.9	34.6	34.6
Epha3	0.27	0.29	0.51	0.22	0.0184172	4.26677e-05	0.138579	11.5	13.1	13.1
Rps4x	12.79	0.41	0.51	0.09	2.665e-128	3.47621e-177	1.02806e-06	99.4	98.7	98.7
Lsm5	0.65	0.43	0.51	0.08	4.1223e-22	3.47304e-28	0.169934	43.6	46.8	46.8
Gm34455	0.51	0.41	0.51	0.1	3.79545e-09	1.20506e-12	0.271753	27.2	30.1	30.1
Ccnb2	0.17	1.12	0.51	-0.61	0.000629215	0.161207		1.3	6.9	6.9
Clk1	2.78	0.27	0.51	0.23	2.05e-27	1.2476e-88	8.59714e-20	88.6	88.3	88.3
Cela1	0.29	0.23	0.51	0.27	0.000353044	1.11044e-14	9.26227e-05	21.4	22.3	22.3
Mis18bp1	0.12	0.93	0.5	-0.42	0.0281036	0.267479		0.7	5	5
Dync2li1	0.62	0.41	0.5	0.1	1.32535e-19	8.30797e-28	0.063008	40.4	46.7	46.7
Spry2	1.81	0.46	0.5	0.04	1.21847e-40	2.22867e-44	0.399744	72.8	74.3	74.3
Tusc3	1.44	0.28	0.5	0.23	1.04455e-14	4.6822e-45	5.08677e-10	65.5	67.7	67.7
Rpl36	13.98	0.31	0.5	0.19	3.62726e-97	2.95563e-239	1.94896e-36	99.6	99.5	99.5
Rps26	7.96	0.47	0.5	0.03	3.15551e-139	5.94595e-146	0.204062	98.4	98.8	98.8
Ndufa4	5.64	0.22	0.5	0.28	2.10617e-29	2.67857e-144	1.30286e-46	98.4	98.4	98.4
Trnp1	0.17	0.32	0.5	0.18	0.000873353	2.30984e-07		11.8	15.4	15.4
Trmt10a	0.27	0.44	0.5	0.06	2.36826e-08	6.42351e-10	0.575603	16	20.5	20.5
Dcxr	0.58	0.59	0.5	-0.09	4.20298e-34	1.30716e-22	0.150564	37.3	44.5	44.5
Hist1h3e	0.35	0.7	0.5	-0.2	5.41261e-29	6.60251e-14	0.00597656	22.4	29.3	29.3
Fas	0.41	0.69	0.5	-0.19	1.28169e-20	2.81663e-10	0.030552	21.9	26.1	26.1
Plxnd1	0.45	0.05	0.5	0.45	0.408248	1.26087e-20	7.78925e-17	32.6	29.7	29.7
Zic2	0.14	0.4	0.5	0.1	0.00869789	0.00134815		6.3	10.7	10.7
Ctxn1	0.22	0.39	0.5	0.11	5.41265e-06	1.53824e-08	0.335963	14.4	17.5	17.5
Rpl6	10.1	0.33	0.5	0.17	5.9244e-83	1.2919e-177	1.531e-21	99.4	99.2	99.2
Qpct	0.17	0.34	0.5	0.16	0.00373749	2.74616e-05		10	12.5	12.5
Ckap2l	0.18	1.25	0.5	-0.75	0.000190321	0.18252		1.6	6.3	6.3
Arhgap10	0.21	0.39	0.5	0.1	0.000954711	5.07953e-05	0.540687	9.6	13.5	13.5
Rragd	0.16	0.34	0.5	0.16	0.00250916	1.3718e-05		9.9	13.3	13.3
Ppargc1b	0.17	0.24	0.5	0.25	0.0415977	2.89956e-05		10.7	11.4	11.4
Kif20b	0.15	0.98	0.5	-0.48	0.000290641	0.0947831		2.5	7.3	7.3
Rdm1	1.02	0.44	0.5	0.06	2.54521e-27	1.51179e-32	0.260584	56.2	58.7	58.7
Nxph4	0.17	0.36	0.5	0.13	0.000840591	9.02126e-06		10.2	14.1	14.1
Hes1	13.46	0.42	0.5	0.08	3.05332e-46	4.70353e-60	0.0241249	96.9	95.3	95.3
Rps5	9.93	0.53	0.5	-0.03	1.10223e-187	8.19302e-152	0.173599	99.2	99.1	99.1
Ptprm	1.45	0.15	0.49	0.34	0.00246323	3.8921e-25	1.86107e-12	56.3	54.3	54.3
Bola2	1.3	0.34	0.49	0.16	1.35996e-25	3.0571e-52	2.19849e-06	68.2	70.1	70.1
Syne3	0.39	0.28	0.49	0.21	4.68931e-06	1.34202e-15	0.00138871	26.9	27.1	27.1
Nradd	0.31	0.27	0.49	0.22	1.88232e-06	5.60625e-18	0.000246396	23.4	26	26
Dleu2	1.74	0.51	0.49	-0.02	9.92324e-30	7.92777e-26	0.843994	57.6	61.5	61.5
Hsd17b11	0.8	0.37	0.49	0.12	5.44945e-17	1.32992e-27	0.0147486	47.1	50.9	50.9
Pde3b	2.5	0.37	0.49	0.13	7.07236e-22	5.28078e-36	0.00404697	70.5	73.2	73.2
Itga2	0.19	0.25	0.49	0.24	0.0473568	9.23912e-05	0.095709	10.4	11.4	11.4
Foxp2	5.67	-0.14	0.49	0.64	0.00669633	3.24148e-22	6.58311e-36	66.5	66.2	66.2
Plekha2	0.21	0.37	0.49	0.12	4.65062e-05	1.33926e-07	0.304309	12.6	17.2	17.2
Tgfa	0.33	0.05	0.49	0.44	0.504496	1.69394e-11	3.33855e-09	23.4	19.1	19.1
Gm7967	0.19	0.16	0.49	0.33	0.373381	0.00502959	0.0901727	8.4	6.9	6.9
Dynlt1f	0.27	0.48	0.49	0.01	6.58524e-13	2.41932e-12	0.944355	18.8	23.2	23.2
Ndufb1-ps	3.06	0.21	0.49	0.29	2.82621e-19	3.33239e-104	2.68407e-36	91.3	91.9	91.9
Met	0.51	-0.09	0.49	0.58	0.236699	1.69821e-12	9.8844e-17	29.9	23.9	23.9
Tgfb1i1	0.15	0.36	0.49	0.13	0.00144565	1.94997e-05		9.2	13.5	13.5
Ddx39	0.28	0.76	0.49	-0.27	3.77049e-22	5.13822e-09	0.00275479	14.8	22.9	22.9
Lbhd1	0.15	0.37	0.49	0.12	0.00405082	0.000184966		8.5	12.1	12.1
Baiap2	0.24	0.45	0.49	0.04	8.63645e-08	2.44236e-08	0.786889	14.4	19.4	19.4
Arhgef3	0.4	0.83	0.49	-0.34	2.45672e-19	9.59185e-07	0.00105462	15.2	22.8	22.8
Fbxo32	0.45	0.18	0.49	0.31	0.00442605	9.12768e-16	7.56695e-07	29.7	28.7	28.7
Chgb	0.17	0.25	0.49	0.24	0.025931	9.56386e-06		12.2	12.7	12.7
Dnajc9	0.68	0.73	0.49	-0.24	2.55425e-50	2.98794e-20	3.77216e-06	41.5	46.7	46.7
Kdelr2	0.64	0.35	0.49	0.14	1.5686e-14	1.62797e-25	0.00757383	42.3	45	45
Pold4	0.52	0.42	0.49	0.06	6.17177e-16	2.70122e-19	0.363322	35	38.5	38.5
Arf6	0.58	0.5	0.49	-0.01	8.3984e-25	1.12231e-21	0.88641	38.5	42.7	42.7
Reep1	0.16	0.31	0.49	0.18	0.0191294	0.000260312		8.6	11.1	11.1
Efhb	0.12	0.51	0.49	-0.03	0.00813382	0.0165221		3.1	9.8	9.8
Ndufa1	2.47	0.26	0.49	0.23	9.19694e-28	1.64828e-95	1.16493e-22	87.7	88.3	88.3
Slc2a3	0.3	0.37	0.49	0.12	1.48933e-05	2.25909e-08	0.276597	18.2	20	20
Enpp6	0.13	0.23	0.49	0.26	0.21511	0.00731799		6.5	7.4	7.4
Clcf1	0.23	0.21	0.49	0.27	0.0113742	4.75673e-09	0.00224197	16.7	16.9	16.9
Mnt	0.42	0.29	0.49	0.2	3.44217e-08	8.57638e-20	0.000659331	31	32.2	32.2
Nat8f1	0.88	0.11	0.49	0.38	0.0213059	1.40825e-29	4.40224e-18	53.3	49.6	49.6
Nfkbia	0.68	0.44	0.48	0.04	2.18089e-12	1.47535e-13	0.66464	35	36.7	36.7
Flrt1	0.39	0.3	0.48	0.19	2.48539e-06	5.70039e-14	0.00936146	25.7	26.6	26.6
Hmgn1	6.77	0.36	0.48	0.13	1.06418e-78	2.65151e-135	2.30932e-10	99	98.8	98.8
Rad51b	0.72	1.12	0.48	-0.64	2.01188e-32	3.03196e-06	3.01253e-10	20.1	28.3	28.3
Col2a1	4.56	0.39	0.48	0.1	9.65998e-54	1.18796e-77	0.000610339	94.4	93	93
Nme5	0.29	0.53	0.48	-0.05	1.40127e-13	1.35494e-10	0.674094	17.9	23	23
Nxpe3	0.32	0.23	0.48	0.26	0.00550772	3.22784e-09	0.00400616	18.9	19.5	19.5
Robo1	1.07	0.24	0.48	0.25	0.000188139	1.22167e-14	0.000206611	40.3	40.8	40.8
Ruvbl1	0.63	0.45	0.48	0.03	8.84731e-25	1.76374e-26	0.578545	41.8	48.6	48.6
Ifi44	0.31	0.92	0.48	-0.44	1.66904e-15	0.000122863	0.000745404	11.2	15.1	15.1
Rab11fip1	0.23	0.35	0.48	0.13	6.09781e-05	9.04319e-08	0.251767	14.8	17.4	17.4
Arpc4	0.87	0.39	0.48	0.09	4.43217e-24	5.62214e-33	0.0638991	53.1	57.8	57.8
Apol9b	0.11	0.33	0.48	0.15	0.0560896	0.00683322		5.4	8.2	8.2
Ddx41	0.47	0.41	0.48	0.07	2.84519e-16	1.4715e-20	0.268069	33.2	36.8	36.8
Calca	0.21	0.47	0.48	0.01	2.11888e-05	2.66094e-05	0.942972	12	16.7	16.7
Tiparp	1.06	0.55	0.48	-0.07	8.86305e-27	7.37229e-19	0.30621	47.7	50.9	50.9
Isg20	0.14	0.49	0.48	-0.02	0.000622682	0.00156662		6.3	10.7	10.7
Rnd3	1.03	0.43	0.48	0.05	1.51397e-19	1.15238e-22	0.422914	51.1	51.1	51.1
Clrn1	1.86	0.09	0.48	0.39	0.00930438	2.50079e-48	2.25011e-31	73.9	70.6	70.6
Wdr1	1.98	0.69	0.48	-0.22	2.84835e-118	9.41359e-50	5.25575e-12	74.9	83.2	83.2
Aspm	0.13	1.03	0.48	-0.55	0.013412	0.292382		0.7	4.9	4.9
Rpl37	20.18	0.38	0.48	0.1	1.33753e-148	2.67085e-216	8.95802e-10	99.6	99.5	99.5
Fkbp7	0.34	0.33	0.48	0.14	5.66402e-09	3.9717e-16	0.0319907	24.2	27.3	27.3
Atp5e	6.98	0.28	0.48	0.19	7.23221e-66	6.20999e-178	4.74242e-31	98.9	98.4	98.4
Cntf	1	-0.15	0.48	0.63	0.00368946	8.28755e-22	1.04121e-35	49	42.7	42.7
Spc24	0.12	0.86	0.48	-0.38	0.000269942	0.0654549		2.4	9	9
Cenpq	0.37	0.75	0.48	-0.27	1.97887e-28	4.70711e-11	0.000369232	22.2	27.1	27.1
Ipmk	0.41	0.33	0.48	0.15	3.27858e-08	4.63162e-15	0.0327255	27.1	28.6	28.6
Klf4	0.66	0.86	0.47	-0.39	3.66279e-17	1.89295e-05	0.000745404	17.5	24	24
Aprt	0.99	0.29	0.47	0.19	2.16657e-15	1.50758e-39	3.3701e-07	59.6	61.3	61.3
Zfyve28	0.2	0.42	0.47	0.05	0.00082818	0.000279871	0.79411	8.8	12.8	12.8
Polr2k	1.56	0.34	0.47	0.13	6.68345e-32	2.62035e-57	2.24693e-05	74.4	77.8	77.8
Gmnn	0.14	0.89	0.47	-0.42	6.57448e-07	0.0157613		3.8	12.6	12.6
Spsb1	0.21	0.32	0.47	0.15	0.000961741	1.86957e-06	0.212442	12.8	15.9	15.9
Itpr3	0.11	0.29	0.47	0.19	0.0593668	0.00193413		6.9	9.5	9.5
Rpgr	0.6	0.64	0.47	-0.17	1.10867e-25	5.45757e-13	0.0177315	28.9	35.4	35.4
Gm26532	0.38	0.3	0.47	0.17	8.90354e-06	8.57547e-12	0.0299281	25.7	25	25
Pcare	0.09	0.36	0.47	0.11	0.0838534	0.0285847		3	7.6	7.6
Rps15a	12.84	0.4	0.47	0.07	4.12013e-135	1.9906e-172	0.000109537	99.5	99.3	99.3
Ypel2	0.77	0.09	0.47	0.39	0.127175	5.5559e-20	1.99274e-13	42.2	40.1	40.1
Myo5a	0.95	0.25	0.47	0.23	5.15788e-07	6.27685e-22	1.22343e-05	48.2	47.9	47.9
Hist1h4d	3.24	0.52	0.47	-0.05	5.68851e-84	1.77705e-63	0.167938	89.8	90.8	90.8
Fabp5	0.23	0.2	0.47	0.27	0.145892	0.000657363	0.0894413	11.1	10.7	10.7
Knstrn	0.19	1.18	0.47	-0.7	4.32783e-05	0.140326	0.0351942	1.5	7.9	7.9
Kdm5c	1.52	0.6	0.47	-0.13	2.15239e-81	7.35314e-45	0.000148286	67.6	75.7	75.7
Dixdc1	0.5	0.45	0.47	0.02	1.1525e-14	6.0579e-15	0.800723	29	34	34
Zic5	0.11	0.38	0.47	0.1	0.030047	0.00817477		4.9	9.1	9.1
Ccdc34	1.1	1.02	0.47	-0.55	1.31957e-79	1.82695e-15	1.84578e-22	47.1	49.8	49.8
Dstn	4.2	0.46	0.47	0.01	1.43716e-92	9.9416e-91	0.677174	95.4	95.7	95.7
Tmem131l	0.28	0.21	0.47	0.26	0.0111307	6.60812e-09	0.00278316	17.4	18.7	18.7
Hmgb3	0.4	0.43	0.47	0.04	9.73276e-13	1.32111e-13	0.711969	27.2	28.1	28.1
Grtp1	0.18	0.28	0.47	0.19	0.00703437	7.38704e-06		12	13.9	13.9
Dalrd3	0.7	0.41	0.47	0.05	2.49679e-22	2.8575e-26	0.336161	44.4	49.9	49.9
Arnt2	0.28	0.16	0.47	0.31	0.0702016	5.20907e-08	0.000751849	18.1	17	17
Atpif1	3.12	0.36	0.47	0.11	1.08018e-53	3.76884e-85	1.47558e-05	91.1	91.7	91.7
AA388235	0.19	0.74	0.47	-0.27	8.06416e-09	0.00062681	0.0862418	5.9	16.1	16.1
Phyhd1	1.39	0.29	0.47	0.18	5.59524e-17	1.04114e-41	4.55036e-07	66.9	68	68
Gfpt2	0.13	0.34	0.47	0.13	0.0317178	0.00338347		7	9.6	9.6
Rpap3	0.49	0.4	0.47	0.06	1.6539e-15	6.16588e-19	0.351211	33.3	37.5	37.5
Crnde	0.36	0.54	0.47	-0.07	1.80358e-18	5.28998e-13	0.405498	21.7	28.5	28.5
Ino80b	0.73	0.53	0.47	-0.06	9.14429e-37	1.57246e-26	0.287076	45.6	53.3	53.3
Fndc5	0.22	0.17	0.47	0.3	0.0521929	5.53684e-08	0.00126789	16.3	16.1	16.1
Gm13889	0.12	0.4	0.47	0.07	0.038531	0.0195935		4.8	8.8	8.8
Tacc3	0.18	0.78	0.47	-0.31	2.28164e-08	0.0019777		7.9	13.2	13.2
Atp1b2	6.5	0.48	0.47	-0.01	2.43387e-155	3.41676e-136	0.711616	98.6	97.4	97.4
Grik1	0.16	0.37	0.47	0.1	0.00225332	0.000160451		8.8	12.9	12.9
Socs5	0.93	0.08	0.47	0.39	0.127651	6.00091e-23	9.27453e-16	52	48.3	48.3
Nsmce1	0.75	0.57	0.47	-0.1	9.24076e-40	3.63342e-24	0.0412031	46.1	52.5	52.5
Mthfd1l	0.35	0.36	0.47	0.1	4.59494e-05	3.4889e-07	0.38586	18	18.8	18.8
Otx2	0.12	0.31	0.47	0.16	0.0891385	0.0105977		5.1	8.3	8.3
Kcnh5	0.17	0.35	0.47	0.12	0.0213856	0.00250689		8.4	9.9	9.9
Cbs	0.28	0.39	0.47	0.08	4.44298e-09	8.73681e-12	0.383135	19.8	23.7	23.7
Phb2	0.8	0.39	0.47	0.08	1.00927e-22	5.76102e-30	0.113792	50.9	55.8	55.8
Atp5g2	4.64	0.34	0.47	0.13	1.55962e-71	1.53735e-125	3.70771e-10	97.3	97.1	97.1
Hspg2	0.23	0.35	0.46	0.12	7.43813e-06	6.05788e-09	0.245528	15.8	19.6	19.6
Fam78b	0.39	-0.05	0.46	0.52	0.505499	4.56446e-10	4.72894e-12	24.1	19.5	19.5
Clic4	1.46	0.62	0.46	-0.15	2.68358e-55	1.41226e-28	0.000530117	62.1	67.1	67.1
Rps18	13.42	0.4	0.46	0.07	1.45102e-138	1.66611e-173	0.000261914	99.4	99.5	99.5
Bcl3	0.22	0.47	0.46	0	1.66918e-06	5.27581e-06	0.990214	11.8	17.7	17.7
Scg5	2.19	0.13	0.46	0.33	1.44338e-05	3.94393e-55	4.03737e-28	82	80.1	80.1
Morn2	0.99	0.47	0.46	-0.01	7.26116e-36	3.2039e-32	0.940049	55.1	61.7	61.7
Asxl3	0.32	0.19	0.46	0.27	0.0398941	6.30818e-07	0.00794896	18.2	17.3	17.3
Hspa2	0.17	0.41	0.46	0.05	4.21483e-05	7.54616e-06		10.8	16	16
Glis3	3.49	0.11	0.46	0.35	0.00316014	1.9414e-35	3.16262e-20	78.7	75.7	75.7
Lig1	0.32	0.94	0.46	-0.48	1.27548e-24	3.70073e-06	1.8712e-06	17.5	20.1	20.1
Rcn3	0.53	0.36	0.46	0.1	1.28527e-13	1.85551e-20	0.0741893	36.9	39.5	39.5
Slc9a3r2	0.22	0.32	0.46	0.14	3.24457e-05	6.73251e-09	0.150466	16	19.1	19.1
Uqcc3	0.89	0.2	0.46	0.26	1.36886e-07	5.12096e-34	2.84807e-11	55.7	57.1	57.1
Rps20	14.31	0.29	0.46	0.18	9.32052e-70	5.59593e-170	8.48667e-26	99.5	99.3	99.3
Slc38a2	1.28	0.44	0.46	0.02	4.96223e-28	2.17134e-28	0.742586	59.8	62.7	62.7
Ypel3	2.21	0.31	0.46	0.15	3.01511e-31	7.07965e-63	2.76603e-07	84.2	84.9	84.9
2310010J17Rik	0.55	0.25	0.46	0.21	4.61813e-07	5.18368e-21	3.02096e-05	38.3	39.9	39.9
Nop10	1.7	0.29	0.46	0.17	1.80267e-23	3.81499e-56	8.47786e-09	76.5	77.1	77.1
Myadm	0.26	0.25	0.46	0.21	0.000124359	1.6039e-12	0.0028322	20.6	21.6	21.6
Ttyh2	0.32	0.22	0.46	0.24	0.000921979	1.11965e-11	0.00127627	22.1	23	23
Pisd	0.55	0.25	0.46	0.21	5.58637e-07	1.90341e-20	4.70638e-05	37.1	39.9	39.9
Ift22	0.43	0.51	0.46	-0.05	5.54441e-22	1.01655e-16	0.548027	29	35	35
Irx3	0.09	0.35	0.46	0.11	0.0487418	0.0116481		4.5	8.5	8.5
Marcksl1	0.85	-0.14	0.46	0.59	0.00212795	9.08953e-30	2.3077e-46	55.1	46.2	46.2
Tnfrsf1b	0.14	0.27	0.46	0.18	0.0291494	0.000289739		9.5	11.4	11.4
Mcm3	0.13	0.8	0.46	-0.34	4.94806e-06	0.0159291		4.6	11.3	11.3
Cpne2	0.59	0.14	0.46	0.32	0.00893352	2.06711e-20	1.72586e-10	39.6	38.9	38.9
Fdx2	0.41	0.4	0.46	0.06	9.45102e-16	7.94722e-19	0.395472	29.8	34.7	34.7
Elof1	0.91	0.44	0.46	0.01	6.39404e-33	5.3376e-32	0.843573	54.6	60.8	60.8
Gm34921	0.11	0.34	0.46	0.12	0.0815419	0.0202668		5.3	8	8
Rpl36a	7.55	0.33	0.46	0.13	2.68041e-71	4.22367e-130	1.51901e-11	98.5	98.1	98.1
Pclaf	0.12	0.59	0.46	-0.13	0.0215918	0.0949816		4.2	6.3	6.3
Mak	0.21	0.37	0.46	0.08	0.00161878	0.000187569	0.63381	10.5	13.1	13.1
Rps3a1	14.25	0.43	0.46	0.03	8.67992e-147	1.87168e-154	0.171771	99.6	99.4	99.4
Dap	0.44	0.42	0.46	0.03	3.0067e-16	4.30669e-17	0.704189	30.1	35.6	35.6
Capns1	2.64	0.25	0.46	0.21	1.18696e-24	3.09769e-78	3.34733e-17	89.4	88.5	88.5
Ssna1	0.77	0.48	0.46	-0.02	1.46013e-30	2.48514e-25	0.718107	49.4	53.7	53.7
Dapl1	17.08	0	0.45	0.45	0.96339	5.90611e-85	4.03053e-84	99.5	98	98
Emg1	1.05	0.39	0.45	0.07	1.55929e-28	2.15626e-36	0.114626	60.5	66	66
Hist1h4h	0.71	0.51	0.45	-0.05	3.45025e-28	6.73312e-21	0.419015	44	48.7	48.7
Vegfc	0.35	0.19	0.45	0.26	0.0256853	1.16649e-07	0.00517872	19.5	19.8	19.8
Kcnv2	0.1	0.31	0.45	0.15	0.0986047	0.0165558		5.3	7.5	7.5
Zfp385a	1.33	0.21	0.45	0.24	1.24494e-09	1.07012e-39	5.60974e-12	68.1	67.1	67.1
Sf3b4	0.55	0.47	0.45	-0.01	3.56339e-24	5.41449e-21	0.877204	37.8	44.2	44.2
Kcnc3	0.41	0.16	0.45	0.29	0.00663132	1.53849e-14	2.33809e-06	28.8	28.2	28.2
Rpl3	10.86	0.44	0.45	0.02	5.18488e-140	3.69876e-138	0.548939	99.2	98.9	98.9
Dnal4	0.26	0.39	0.45	0.06	3.36801e-10	2.19919e-12	0.484184	18.8	23.9	23.9
Yif1b	0.89	0.47	0.45	-0.01	4.70071e-34	2.83244e-29	0.81968	54.9	58.8	58.8
Podxl	0.09	0.27	0.45	0.19	0.151799	0.0157732		5.1	7.2	7.2
Ifi30	0.36	0.39	0.45	0.06	1.53377e-12	3.41374e-15	0.431127	25.5	29.5	29.5
Tyms	0.29	0.67	0.45	-0.22	2.18636e-17	9.97051e-08	0.017652	19	22.1	22.1
Cplx2	0.47	0.3	0.45	0.15	3.92808e-08	2.33007e-16	0.0113442	32.6	34.3	34.3
Mrln	0.29	0.29	0.45	0.16	6.00868e-05	6.79561e-10	0.0534601	19.7	22.3	22.3
Zcchc9	0.62	0.33	0.45	0.12	3.80544e-13	3.88072e-22	0.0206404	41.4	45	45
Iqgap1	0.86	0.36	0.45	0.09	5.89757e-15	1.00079e-21	0.0908821	48.6	48.8	48.8
Maz	0.91	0.48	0.45	-0.02	5.27546e-32	1.94485e-26	0.696453	53.6	57.9	57.9
Jpt2	0.31	0.56	0.45	-0.11	2.30982e-19	9.55082e-12	0.162452	20.5	27	27
Cenpk	0.12	0.84	0.45	-0.39	0.000556963	0.0914213		1.9	9.3	9.3
Tmeff2	3.07	0.21	0.45	0.24	1.23434e-05	1.50187e-21	7.93097e-07	65.7	66.2	66.2
Ppp1r18	0.22	0.35	0.45	0.1	6.97124e-06	2.6018e-08	0.353486	15.4	18.9	18.9
Qsox1	0.38	0.25	0.45	0.2	1.27913e-05	2.07313e-15	0.000803479	28.3	29	29
Slc16a2	2.48	0.11	0.45	0.34	0.00188529	4.85855e-38	2.24002e-21	77.2	73.5	73.5
Pbx3	0.26	0.55	0.45	-0.1	1.37793e-05	0.000848752	0.57717	11.4	12.5	12.5
Dnph1	0.21	0.8	0.45	-0.35	1.38923e-14	5.97101e-05	0.00324159	10	18.5	18.5
Cdk4	0.94	0.48	0.45	-0.03	1.55578e-38	6.95057e-31	0.570714	56.4	61.3	61.3
Mir124a-1hg	0.67	0.8	0.45	-0.35	1.37868e-50	1.4211e-14	7.4339e-10	34.4	44.8	44.8
Tigd2	0.73	0.15	0.45	0.3	0.00126291	9.23345e-24	5.88247e-11	48	46	46
Atp5k	4.15	0.22	0.45	0.23	5.15573e-29	4.57432e-112	1.20766e-29	96.1	95.7	95.7
Uck2	0.25	0.49	0.45	-0.05	1.20666e-08	8.22735e-07	0.746012	14.3	18.7	18.7
Dscaml1	0.31	0.39	0.45	0.06	1.58063e-05	1.78031e-06	0.675826	14.8	17.5	17.5
Iqcn	0.15	0.35	0.45	0.1	0.00224549	0.000113993		10.1	13.5	13.5
Iglon5	0.1	0.29	0.45	0.16	0.0716578	0.00532764		6.3	8.9	8.9
Icam1	0.27	0.45	0.45	-0.01	2.66676e-07	1.31471e-06	0.96561	14.6	19.8	19.8
Igha	0.19	-0.59	0.45	1.04	1.91335e-12	4.14381e-07	9.57898e-34	23.7	0.1	0.1
Dusp7	0.24	0.24	0.45	0.2	0.00106924	1.92898e-09	0.0131084	18	19.2	19.2
Hist3h2a	1.48	0.38	0.45	0.06	2.8939e-28	2.21397e-35	0.149793	67.2	70.8	70.8
Kif15	0.12	0.76	0.45	-0.32	0.00782984	0.150554		2.8	6.5	6.5
Cenpm	0.11	0.81	0.45	-0.37	0.00737954	0.177485		0.8	7.3	7.3
Rpl22l1	3.19	0.44	0.45	0	3.99577e-72	8.59515e-67	0.97232	89.9	92	92
Gm45716	0.21	0.37	0.45	0.08	0.00181457	0.000226782	0.641314	10.2	12.6	12.6
Mettl1	0.3	0.5	0.44	-0.06	4.27823e-13	1.34331e-09	0.559272	18.6	24.2	24.2
Eif3e	1.65	0.38	0.44	0.06	2.66544e-39	1.89178e-48	0.0985871	75.1	78.5	78.5
Lypla2	0.44	0.3	0.44	0.14	2.31098e-08	4.07758e-16	0.0173453	32.4	34.4	34.4
Glcci1	0.27	0.25	0.44	0.2	0.00549247	6.20236e-07	0.0512582	16.4	17.4	17.4
Gsr	0.49	0.25	0.44	0.19	4.71904e-06	2.07048e-15	0.00165765	32.5	34.2	34.2
Cenpw	0.11	0.71	0.44	-0.27	0.00486695	0.105502		1.8	8.4	8.4
Cmtm7	0.13	0.21	0.44	0.23	0.124443	0.000977563		8.9	9.8	9.8
Med25	1.04	0.38	0.44	0.07	6.54704e-23	4.72082e-29	0.176947	56.5	60.6	60.6
Ndufv3	2.06	0.23	0.44	0.22	1.34857e-17	1.88729e-62	1.1108e-15	83	83.5	83.5
Mab21l1	1.03	0.29	0.44	0.16	6.23012e-13	3.24266e-28	0.00024573	58.1	58	58
Uhrf1	0.09	0.71	0.44	-0.27	0.0126341	0.148457		1.1	8	8
Fance	0.51	0.24	0.44	0.2	2.1393e-06	1.66574e-18	0.000126859	36.3	37.7	37.7
Sdhd	0.58	0.43	0.44	0.01	7.07777e-22	6.91088e-21	0.908947	39.8	45.3	45.3
Naa38	0.83	0.21	0.44	0.23	1.79067e-07	6.6202e-30	3.35494e-09	54.3	54.6	54.6
Vkorc1	0.78	0.29	0.44	0.15	2.78016e-13	1.53678e-27	0.000574868	51.2	53.6	53.6
D830036C21Rik	0.2	0.38	0.44	0.06	0.000122871	1.81475e-05	0.69461	12	16.4	16.4
Pxk	0.94	0	0.44	0.44	0.953673	1.03755e-27	4.91595e-27	56.3	52.1	52.1
Icmt	0.27	0.27	0.44	0.17	6.87015e-05	3.06257e-10	0.0372405	20.7	21.6	21.6
1110038B12Rik	0.34	0.37	0.44	0.07	2.70533e-10	7.43376e-13	0.421475	24.1	26.7	26.7
Ramp1	0.47	0.36	0.44	0.08	1.45549e-08	1.63508e-11	0.334144	29.2	30.5	30.5
Sap30	0.24	0.44	0.44	0	3.23494e-10	1.61171e-09	0.993627	17.2	22.1	22.1
Gas1	5.83	0.16	0.44	0.28	5.53578e-07	4.8117e-43	1.09716e-17	94.4	93	93
D630033O11Rik	3.36	0.13	0.44	0.31	2.11059e-06	2.96908e-60	6.1515e-30	88.8	86.7	86.7
C530008M17Rik	0.3	0.3	0.44	0.14	0.00317516	2.96681e-05	0.308559	14.9	16.3	16.3
Susd4	0.32	0.16	0.44	0.28	0.0400303	8.50255e-09	0.000588072	21.9	20.8	20.8
Rhbdl3	0.62	0.01	0.44	0.43	0.872243	2.69145e-13	2.10226e-12	35.8	32.7	32.7
Pim3	0.36	0.38	0.44	0.06	2.35935e-11	5.6252e-14	0.423942	24.9	28.9	28.9
Rfc2	0.64	0.54	0.44	-0.11	2.82366e-33	9.7061e-20	0.0498253	42.5	47.8	47.8
Ppp1r14b	1.23	0.11	0.44	0.33	0.00186634	4.54337e-38	4.08431e-21	68.1	65.2	65.2
Ppp1r10	1.83	0.35	0.44	0.09	7.93526e-27	7.39577e-40	0.0126348	74.8	75.6	75.6
Cxxc4	0.21	0.21	0.44	0.23	0.0302534	6.4871e-06	0.0381084	14.6	15.1	15.1
Armh4	0.21	0.26	0.44	0.18	0.0101946	1.86135e-05	0.143621	13.6	14.5	14.5
Mgmt	0.85	0.53	0.44	-0.09	6.7487e-19	4.96154e-12	0.2288	37.3	41.3	41.3
Pitpnm3	0.15	0.27	0.44	0.17	0.0762199	0.00476509		7.9	8.9	8.9
Mrpl38	0.44	0.4	0.44	0.04	2.91979e-16	8.72159e-18	0.603939	31.2	36.6	36.6
Rpl32	12.39	0.35	0.44	0.08	9.57859e-107	1.71664e-149	4.1588e-06	99.4	99.3	99.3
Slc25a25	0.43	0.36	0.44	0.08	1.25613e-09	7.46512e-13	0.312114	27.7	30.5	30.5
Srxn1	0.32	0.45	0.44	-0.01	3.55402e-07	2.21858e-06	0.942237	20.5	19.7	19.7
Tcf19	0.09	0.65	0.44	-0.21	0.00940352	0.105805		2.4	8	8
Slbp	0.75	0.71	0.44	-0.28	8.72497e-44	4.57582e-15	5.55004e-07	43	47.1	47.1
Plp2	0.22	0.51	0.44	-0.08	5.3175e-11	1.11555e-07	0.503518	14.8	21.2	21.2
Tmed9	2.37	0.36	0.44	0.07	1.24983e-48	2.46108e-65	0.0094602	87.6	89.2	89.2
Pde5a	0.17	0.51	0.44	-0.07	0.00016457	0.00231064		7.6	13.2	13.2
Glis1	0.51	0.27	0.44	0.17	0.00119165	2.03432e-07	0.0865305	23.2	23.9	23.9
H2afz	5.67	0.81	0.44	-0.38	6.748e-174	2.15462e-45	1.46241e-35	97.6	96.2	96.2
Slc35f1	13.99	0.34	0.43	0.09	7.24252e-49	2.24024e-72	0.000461348	98.6	97.7	97.7
Lgals3	0.66	0.38	0.43	0.05	5.87734e-12	3.40203e-14	0.487871	40.4	38.9	38.9
Cep126	0.17	0.42	0.43	0.02	0.00540504	0.00532759		6.9	11.3	11.3
Nucb2	0.31	0.33	0.43	0.11	9.45604e-07	2.28013e-10	0.203598	20.6	23.9	23.9
Pabpc4	0.35	0.3	0.43	0.14	5.72509e-07	8.88381e-13	0.0505161	25.5	26.5	26.5
Amotl2	1.19	0.6	0.43	-0.17	5.92556e-46	1.03914e-21	0.000322322	55.8	60.9	60.9
Adcy2	0.11	0.3	0.43	0.13	0.145638	0.0392132		5.5	6.9	6.9
Sgo2a	0.12	0.9	0.43	-0.47	0.00768409	0.239718		1.5	6	6
Zswim4	0.3	0.29	0.43	0.14	2.21847e-05	6.99949e-10	0.0866841	21.8	22.9	22.9
Myl6	5.97	0.36	0.43	0.07	1.5239e-54	1.00175e-71	0.0099034	97.3	96.7	96.7
Ndufs2	1.73	0.29	0.43	0.14	6.57326e-24	3.49687e-50	1.80461e-06	78.8	79.7	79.7
Gm5577	0.16	0.38	0.43	0.05	0.00174913	0.000666433		9.3	12.5	12.5
Dtl	0.09	0.8	0.43	-0.37	0.0106081	0.205268		0.6	7.3	7.3
Gse1	1.64	0.2	0.43	0.23	2.65114e-06	3.97448e-24	2.05844e-07	66.4	62.4	62.4
Wdr19	0.3	0.38	0.43	0.05	8.35821e-08	3.44212e-09	0.605081	19.5	22.6	22.6
Pmf1	0.18	0.58	0.43	-0.14	6.94659e-08	0.000142029		9.9	16.8	16.8
Cdca7l	0.18	0.45	0.43	-0.02	4.79664e-06	3.25746e-05		11.7	16.2	16.2
Tmem237	0.69	0.35	0.43	0.09	2.09e-14	2.08009e-20	0.121999	46.2	45.9	45.9
Lekr1	0.39	0.36	0.43	0.07	2.92439e-06	5.2274e-08	0.50055	20.1	25	25
Mthfsl	0.7	0.35	0.43	0.08	5.16405e-16	2.15916e-22	0.114151	45.5	49.1	49.1
Gpsm2	0.39	0.51	0.43	-0.08	2.96062e-14	1.00749e-09	0.409962	23.7	26.6	26.6
Tm9sf1	0.43	0.37	0.43	0.06	5.8327e-14	5.74409e-17	0.388316	30.9	35.3	35.3
1700088E04Rik	0.24	0.4	0.43	0.03	4.74888e-07	2.02412e-07	0.825131	15.2	19.5	19.5
Rps9	12.43	0.36	0.43	0.07	1.02666e-107	1.02933e-141	0.000143822	99.4	99	99
Cebpz	1	0.46	0.43	-0.03	4.07294e-31	3.90168e-25	0.63381	53.1	60.4	60.4
Cald1	1.45	0.23	0.43	0.2	6.56338e-09	9.94866e-27	2.72667e-06	64.6	62.2	62.2
Nop16	0.27	0.34	0.43	0.09	5.56937e-08	1.48151e-11	0.239623	20.5	23.8	23.8
Tbx5	0.31	0.37	0.43	0.05	3.83736e-05	5.37149e-06	0.695703	15.6	19.9	19.9
Kifc1	0.1	0.77	0.43	-0.34	0.010812	0.188521		1.3	7.2	7.2
Card19	0.33	0.28	0.43	0.15	4.35157e-07	6.93297e-14	0.0250697	25.6	26.9	26.9
Snrpb	2.19	0.46	0.43	-0.03	5.92745e-67	1.15576e-52	0.362024	84.3	86.6	86.6
Mrpl54	0.69	0.38	0.43	0.04	9.5121e-20	1.72532e-22	0.452654	46.9	50.4	50.4
Rmi2	0.08	0.65	0.43	-0.23	0.0384258	0.206776		0.6	7.1	7.1
Ulk4	0.36	0.51	0.43	-0.08	1.49184e-11	9.55836e-08	0.428105	20.9	23.3	23.3
Plppr3	0.39	0.05	0.43	0.38	0.457206	9.7879e-13	4.4532e-10	28.9	26	26
Efcab11	0.12	0.78	0.43	-0.35	0.0121559	0.206776		1.7	6.4	6.4
Polr2l	1.96	0.22	0.43	0.21	1.15561e-13	5.34527e-47	9.30191e-12	79.6	80.2	80.2
Plxna2	0.13	0.36	0.43	0.07	0.03668	0.0161762		6	9.3	9.3
Ddx21	0.52	0.52	0.43	-0.1	2.88538e-22	9.17788e-14	0.159941	33.1	37.6	37.6
Kif9	0.14	0.43	0.43	0	0.00470801	0.00717524		6.2	11.2	11.2
Astn2	0.33	0.23	0.43	0.2	0.0116905	2.94216e-06	0.0587423	19.3	19.6	19.6
Sem1	3.13	0.26	0.43	0.16	4.21445e-33	8.83435e-83	2.31931e-13	93.2	92.4	92.4
Zfp593	0.22	0.48	0.42	-0.06	6.66672e-09	1.1519e-06	0.6549	13.6	20.3	20.3
Fam161a	0.29	0.31	0.42	0.12	9.46985e-05	1.17825e-07	0.231999	18.1	19.5	19.5
Ccna2	0.11	0.83	0.42	-0.41	0.0136169	0.246817		1.6	5.9	5.9
Nrm	0.08	0.46	0.42	-0.03	0.0266952	0.0512727		3	8.7	8.7
Nasp	0.89	0.58	0.42	-0.16	2.02515e-35	4.36923e-17	0.00243698	48.4	50.8	50.8
Rpl10-ps3	0.21	0.62	0.42	-0.2	4.4586e-16	2.3952e-07	0.0277723	12.2	23.6	23.6
Kpna2	0.29	0.71	0.42	-0.29	1.32825e-15	9.33808e-06	0.00514869	18.4	19.2	19.2
Dmpk	0.28	0.28	0.42	0.14	1.16697e-05	7.82966e-11	0.0566518	21.3	23.7	23.7
Relb	0.41	0.43	0.42	-0.01	8.5949e-11	1.43701e-09	0.937809	25.3	27.6	27.6
Pimreg	0.12	0.92	0.42	-0.49	0.0438284	0.38684		0.1	5	5
Atp5md	4.03	0.21	0.42	0.22	2.83234e-25	8.79396e-100	4.69232e-27	95.7	96.1	96.1
Baz1a	0.24	0.25	0.42	0.17	0.00794055	1.27996e-05	0.143826	15	16.2	16.2
Hexb	0.44	0.37	0.42	0.05	3.95302e-13	2.4455e-15	0.495306	31.1	35.2	35.2
Nrep	0.48	-0.14	0.42	0.56	0.0109258	1.01965e-16	5.3458e-28	37.7	30.1	30.1
Banf1	0.97	0.58	0.42	-0.16	4.88797e-47	3.44802e-22	0.000284829	55.7	59	59
Itga3	0.22	0.22	0.42	0.2	0.00596586	1.59291e-07	0.0257341	17.2	17.6	17.6
Slc3a2	4.44	0.21	0.42	0.21	2.14518e-20	2.19006e-75	1.35726e-19	96.4	94.6	94.6
Btc	0.34	0.35	0.42	0.07	2.88963e-08	1.11766e-10	0.415895	23.2	26.6	26.6
Anp32b	1.75	0.51	0.42	-0.09	5.61656e-56	5.02714e-35	0.0217743	75.8	78.2	78.2
Cited2	0.82	0.43	0.42	-0.01	1.03796e-12	5.07694e-11	0.890833	36.5	40.9	40.9
Wdr89	0.28	0.52	0.42	-0.1	3.30343e-14	6.52246e-09	0.277225	16.8	25.2	25.2
Ncapg2	0.23	0.7	0.42	-0.29	6.9688e-11	0.000317816	0.0251547	13	16.3	16.3
Skil	0.59	0.22	0.42	0.2	2.60514e-05	4.21586e-16	0.000221131	39.9	39.8	39.8
Cfap69	0.23	0.5	0.42	-0.09	1.69169e-06	0.000172764	0.578431	11.2	16.7	16.7
Foxj2	0.53	0.13	0.42	0.28	0.00907231	2.05065e-17	1.81409e-08	38.2	37.4	37.4
Tmem176a	1.98	0.19	0.42	0.23	1.82522e-10	3.01623e-47	4.2015e-15	79.9	78.7	78.7
Ccng1	0.61	0.74	0.42	-0.33	3.7535e-42	2.41932e-12	2.60212e-08	35.4	41.5	41.5
Lag3	0.15	0.28	0.42	0.14	0.0102918	0.000182401		10.9	13.5	13.5
Slc25a5	1.43	0.33	0.42	0.09	2.35587e-23	4.28996e-34	0.0280128	69.6	71.2	71.2
Foxd1	0.25	0.43	0.42	-0.01	1.05861e-05	4.16195e-05	0.951671	13.8	17.4	17.4
Gpx4	15.3	0.23	0.42	0.18	5.36111e-65	3.44063e-193	2.52696e-38	99.8	99.7	99.7
Sertad1	0.16	0.35	0.42	0.07	0.000713588	9.01379e-05		11.1	15.1	15.1
Plscr2	0.57	0.33	0.42	0.09	1.92234e-08	2.53264e-12	0.21172	33.4	35.9	35.9
Pnrc1	2.28	0.26	0.42	0.16	9.85237e-20	1.26154e-48	4.21219e-08	84.8	82.1	82.1
Nutf2-ps1	0.1	0.37	0.42	0.05	0.0224549	0.0124904		5.1	10.4	10.4
Fam32a	0.8	0.41	0.42	0.01	7.83179e-24	1.09494e-22	0.917919	49.7	54.7	54.7
Brca1	0.12	0.67	0.42	-0.25	0.0026477	0.0843426		3.7	8.6	8.6
Tomm20	2.14	0.26	0.42	0.16	2.64648e-23	1.64373e-55	1.17989e-08	84.2	84.7	84.7
Neurl1b	0.08	0.74	0.42	-0.32	0.0389554	0.275881		0.4	6.7	6.7
Pcyox1l	0.17	0.36	0.42	0.06	8.34413e-05	1.20667e-05		12.5	16.5	16.5
Alyref	0.86	0.48	0.42	-0.07	5.36893e-31	5.48341e-21	0.204815	53.5	55.4	55.4
Uba52	5.55	0.34	0.42	0.08	1.12416e-67	7.10476e-96	0.000228241	97.5	97.6	97.6
Aff3	1.05	0.17	0.42	0.25	0.00813457	1.14748e-11	0.000120438	41.2	41	41
C2cd2l	0.2	0.3	0.41	0.12	0.000480259	1.63333e-06	0.271073	15.2	17.6	17.6
Cops9	3.33	0.23	0.41	0.18	3.46602e-29	1.36038e-88	2.3759e-18	93.5	93.5	93.5
Spata17	0.22	0.46	0.41	-0.05	5.69632e-05	0.000653613	0.790524	10.1	15.3	15.3
Eif4a1	2.24	0.47	0.41	-0.05	1.58969e-57	2.58298e-41	0.153887	82.1	83.4	83.4
Nsg1	0.16	0.29	0.41	0.12	0.0090885	0.000272181		11.4	13	13
mt-Atp8	4.09	0.32	0.41	0.09	3.57137e-65	2.94064e-99	1.19418e-05	95.4	93.8	93.8
Mcm5	0.1	0.69	0.41	-0.28	0.00212328	0.0921737		2.5	9.4	9.4
Hat1	0.7	0.58	0.41	-0.17	2.94906e-30	4.30395e-14	0.0033362	41.4	44.1	44.1
Kazald1	0.6	0.3	0.41	0.12	6.22258e-09	2.96756e-15	0.0541475	38.3	39.8	39.8
Col9a2	0.68	-0.14	0.41	0.55	0.0107285	1.60648e-15	5.29013e-26	42.7	36.4	36.4
Plch2	0.12	0.3	0.41	0.12	0.0468392	0.00658916		7.2	10	10
Polk	0.59	0.45	0.41	-0.04	1.32825e-15	4.82996e-12	0.640669	33.9	37.5	37.5
Adcy1	0.12	0.27	0.41	0.14	0.0950983	0.0112603		7.6	9.1	9.1
Micall2	0.26	0.29	0.41	0.12	8.5141e-05	6.91851e-08	0.206969	19.3	20.4	20.4
Uqcr11	6.35	0.21	0.41	0.2	1.31827e-37	1.17502e-139	2.28923e-35	98.9	98.1	98.1
Llph	1.03	0.32	0.41	0.09	3.01156e-18	1.92228e-27	0.037819	59.6	61.7	61.7
Tsen15	0.75	0.32	0.41	0.09	8.64197e-15	5.3526e-22	0.0708694	50.5	51.4	51.4
mt-Co1	95.63	0.01	0.41	0.4	0.602717	1.61999e-298	1.71146e-290	99.9	100	100
Ssc5d	0.12	0.34	0.41	0.07	0.0129521	0.00409611		7.2	11.7	11.7
Arl4a	0.76	0.37	0.41	0.05	1.22549e-15	4.23637e-18	0.479362	45.4	48.8	48.8
Necab3	0.24	0.25	0.41	0.16	0.000662945	4.38285e-08	0.067372	18.9	19.7	19.7
Mpv17l2	0.35	0.25	0.41	0.16	2.68081e-06	2.26667e-14	0.00637194	28.2	28.7	28.7
Ybx1	5.28	0.43	0.41	-0.02	1.01362e-97	9.23065e-81	0.465774	97.9	97.5	97.5
Lcmt2	0.29	0.43	0.41	-0.02	3.06857e-11	1.43048e-09	0.863195	20.2	25.4	25.4
Otx2os1	0.33	0.31	0.41	0.1	0.000111286	6.60953e-07	0.349129	17.6	19.4	19.4
Lsm3	0.64	0.27	0.41	0.14	1.09897e-09	8.05744e-20	0.00432313	45.5	46	46
Egflam	0.15	0.28	0.41	0.13	0.0799008	0.0131895		7.3	8.5	8.5
Syt9	0.18	0.33	0.41	0.08	0.0084201	0.00127688		10.4	12.5	12.5
Rpl29	8.39	0.32	0.41	0.08	2.48785e-81	7.31455e-120	5.35845e-06	99.1	98.8	98.8
Chpf	0.24	0.3	0.41	0.11	9.44326e-06	3.12483e-09	0.190837	18.9	21.4	21.4
Fmc1	1.68	0.34	0.41	0.06	5.90442e-33	6.22214e-43	0.0633524	76.2	79.2	79.2
Pik3cd	0.1	0.24	0.41	0.17	0.177088	0.0220376		6.2	7.6	7.6
Phkg1	0.15	0.38	0.41	0.02	0.00906626	0.00764143		7.4	11.3	11.3
Fbl	0.55	0.51	0.41	-0.1	9.91723e-27	5.8224e-16	0.0891655	37.4	43	43
Gm12296	0.18	0.29	0.41	0.12	0.103103	0.0240969		7.5	8.5	8.5
Fuom	0.35	0.33	0.41	0.08	3.41346e-09	1.31093e-12	0.28406	26.2	29	29
Nme3	0.11	0.34	0.41	0.07	0.0111003	0.00280756		7.5	11.9	11.9
1700019L13Rik	0.09	0.36	0.41	0.04	0.0526228	0.0362452		4.2	9	9
Wdr83os	1.41	0.1	0.41	0.31	0.00258001	4.84022e-43	4.08851e-25	75	71.9	71.9
Cyp7b1	1.19	0.02	0.41	0.39	0.725321	1.82582e-12	7.11437e-11	44.6	43.5	43.5
Triobp	0.71	0.27	0.41	0.14	3.91687e-09	1.00442e-18	0.00572762	47.4	46.2	46.2
Gabrb3	0.22	0.4	0.41	0.01	3.33636e-06	5.79615e-06	0.963374	14.1	19	19
Plbd2	0.43	0.14	0.41	0.27	0.00694535	5.75162e-16	2.63367e-07	34.4	32.8	32.8
Dlc1	0.22	0.47	0.41	-0.07	5.04693e-06	0.000203022	0.673523	12	16.7	16.7
Rpl21	14.54	0.37	0.41	0.03	6.16303e-132	3.23587e-145	0.0660329	99.6	99.5	99.5
Serf1	0.55	0.3	0.41	0.11	1.95415e-10	1.24578e-17	0.0399503	39.5	41.7	41.7
Id3	6.45	-0.1	0.41	0.51	0.00274329	4.67437e-34	2.29028e-52	94.5	87.1	87.1
Cep89	0.47	0.63	0.41	-0.23	1.978e-22	6.94448e-09	0.00210264	28.5	29.7	29.7
Tnfsf13	0.53	0.48	0.41	-0.08	3.95812e-19	1.34811e-12	0.285831	34.1	37.5	37.5
Pex5l	0.58	0.43	0.41	-0.03	2.07218e-07	3.53289e-06	0.853235	24.3	22.1	22.1
Gm4792	0.11	0.33	0.41	0.07	0.0136327	0.00335446		7.5	11.9	11.9
Rpl23	21.12	0.35	0.41	0.05	2.22113e-117	2.80817e-144	0.00196926	99.7	99.7	99.7
Mcm2	0.1	0.58	0.41	-0.17	0.00274329	0.0503242		3.8	10.2	10.2
Dpm3	2.14	0.21	0.4	0.2	4.64266e-16	2.90886e-57	1.54648e-14	85.9	84.7	84.7
Tspo	2	0.46	0.4	-0.06	3.18749e-56	7.54284e-39	0.0976953	80.5	82	82
Zdhhc2	0.21	0.37	0.4	0.03	0.000957272	0.000533177	0.861459	12.1	13.5	13.5
Gm16223	0.27	0.42	0.4	-0.01	0.00284353	0.00560512	0.965394	10.4	12.5	12.5
Hist1h3a	0.1	0.5	0.4	-0.1	0.00178559	0.0176128		4.6	12.1	12.1
Arpc5	0.92	0.31	0.4	0.09	6.89742e-16	2.27896e-24	0.042434	56.4	59	59
Sdhaf1	0.49	0.21	0.4	0.2	2.70408e-05	1.18897e-16	0.00011286	36.7	37.5	37.5
Npm3	0.86	0.46	0.4	-0.06	5.62038e-29	4.58582e-20	0.263799	50.8	55.3	55.3
Rps14	18.56	0.33	0.4	0.07	1.08037e-111	6.07267e-150	3.21581e-05	99.8	99.6	99.6
Chdh	0.28	0.28	0.4	0.12	3.70049e-05	9.45618e-09	0.158828	20.5	22.5	22.5
Gstm1	2.76	0.62	0.4	-0.21	3.23304e-86	2.04887e-33	1.88652e-10	81.8	85.5	85.5
Scn7a	2.12	0.18	0.4	0.22	0.000127213	1.46406e-17	9.07316e-06	62.4	60.4	60.4
Hacd4	0.12	0.33	0.4	0.07	0.0261979	0.00955721		7.7	10	10
Arhgef2	0.61	0.35	0.4	0.06	2.34269e-12	3.19576e-15	0.39382	40.1	41	41
Serinc3	1.18	0.28	0.4	0.12	5.05131e-16	2.19516e-29	0.00243871	63.6	65.7	65.7
Avpi1	0.67	0.27	0.4	0.13	9.24115e-10	1.71904e-19	0.00613623	46.9	47.5	47.5
Shmt2	0.34	0.39	0.4	0.01	4.05162e-13	9.09557e-13	0.907483	25.7	29.2	29.2
B9d1	0.37	0.44	0.4	-0.03	8.78527e-17	3.26509e-13	0.668588	27.6	31.8	31.8
Snrpb2	0.74	0.45	0.4	-0.05	8.8625e-28	5.14287e-20	0.361056	47.2	53.1	53.1
Mgat3	0.39	0.04	0.4	0.36	0.540584	5.5006e-11	6.71995e-09	29.5	25.4	25.4
Nme2	1.91	0.47	0.4	-0.07	2.15279e-51	1.09877e-33	0.0574985	77.5	77.2	77.2
Dpm2	0.65	0.29	0.4	0.11	7.94571e-12	3.23772e-20	0.0242356	44.8	48.2	48.2
Agtpbp1	1	0.26	0.4	0.14	7.36872e-09	2.35638e-18	0.00598473	52	53.3	53.3
Tcf7	0.17	0.14	0.4	0.26	0.183874	0.000106443		14.6	12.4	12.4
Rps16	14.75	0.38	0.4	0.02	1.80653e-133	3.41676e-136	0.346445	99.6	99.3	99.3
Med16	0.59	0.35	0.4	0.05	2.64759e-14	4.39507e-17	0.41907	40.8	43.7	43.7
Rpl27	9.05	0.28	0.4	0.12	1.14818e-65	1.11481e-124	4.19519e-12	99.2	99.2	99.2
Nap1l1	2.85	0.37	0.4	0.03	3.88657e-47	1.37523e-50	0.414315	89.7	89.5	89.5
CAAA01118383.1	0.51	0.47	0.4	-0.07	2.06759e-21	1.5324e-14	0.313067	33.4	40.3	40.3
Prelp	3.53	0.36	0.4	0.04	5.90295e-52	8.47056e-60	0.166957	93.2	92.2	92.2
Opn1sw	0.13	0.47	0.4	-0.07	0.000359927	0.00391752		7.1	13.7	13.7
Abhd14a	0.89	0.4	0.4	0	7.92009e-26	1.8866e-23	0.97814	54.7	58.9	58.9
Hist1h1e	2.57	0.83	0.4	-0.43	4.66198e-123	7.90187e-26	1.49423e-31	77.1	82.4	82.4
Gm44710	0.11	0.37	0.4	0.02	0.0117525	0.00986115		6.4	11.6	11.6
Tub	0.15	0.31	0.4	0.09	0.0374475	0.00919223		7.8	10.3	10.3
Shb	0.12	0.24	0.4	0.16	0.164919	0.0224764		7.1	7.3	7.3
Htra3	0.22	0.24	0.4	0.16	0.00339985	9.99821e-07	0.0864205	16.9	17.7	17.7
Cdk5rap1	0.36	0.3	0.4	0.1	5.5243e-07	1.41558e-10	0.211831	25.6	27.7	27.7
S100a4	1.04	0.1	0.4	0.3	0.0486657	6.36243e-17	1.25547e-09	56.7	49.5	49.5
Snrpd2	2.66	0.31	0.4	0.08	3.01564e-40	3.21061e-60	0.00138851	89.5	90.3	90.3
Gm17018	0.62	0.47	0.4	-0.08	3.84591e-26	9.14804e-17	0.170099	41.8	46.5	46.5
Per1	0.73	0.3	0.4	0.1	5.36157e-10	1.04825e-15	0.0942195	44.8	44.3	44.3
Wnt5a	0.31	0.06	0.4	0.33	0.375893	5.71408e-09	2.01615e-06	24.3	20.9	20.9
Tgm2	0.3	0.38	0.4	0.02	3.56246e-09	3.61421e-09	0.886853	20.9	26	26
Prdx2	6.24	0.16	0.4	0.23	2.35587e-23	8.35286e-126	1.749e-43	98.8	98.5	98.5
Gsn	0.28	0.61	0.4	-0.22	6.95999e-21	1.48044e-08	0.00396244	18	27	27
Cenpx	0.99	0.11	0.4	0.28	0.00392253	3.93163e-27	3.98653e-14	60.8	58	58
Zfp217	0.32	0.26	0.4	0.14	1.58911e-05	5.32997e-11	0.0427863	24.7	25.8	25.8
Aldh1a1	5.12	0.33	0.4	0.07	2.39367e-10	1.7371e-13	0.340439	60.5	70.4	70.4
Aaas	0.26	0.34	0.4	0.05	1.26978e-06	7.82629e-08	0.626987	19.1	21.7	21.7
Ubald2	0.75	0.5	0.4	-0.11	2.49889e-27	1.27811e-15	0.0548047	48.1	48.2	48.2
Ehd4	0.14	0.29	0.4	0.11	0.0314788	0.00402861		8.6	11.3	11.3
Slc22a4	0.15	0.38	0.39	0.02	0.00484431	0.00466413		8.2	12.2	12.2
Uchl1	0.22	0.33	0.39	0.06	0.000381651	4.18868e-05	0.646043	15.9	15.7	15.7
Uqcrq	4.29	0.27	0.39	0.12	1.17724e-40	4.0672e-81	5.27224e-09	96.8	95.6	95.6
Slc35b2	0.41	0.27	0.39	0.13	1.32137e-07	1.87077e-14	0.0276084	31.7	33	33
Opn1mw	0.12	0.38	0.39	0.01	0.00404318	0.00466808		7.1	13.2	13.2
Hist2h3c1	0.09	0.22	0.39	0.18	0.251495	0.0402636		6.4	6.8	6.8
H2afy2	0.29	0.2	0.39	0.19	0.00256622	5.68179e-09	0.0107137	22.8	22.4	22.4
Nit2	0.35	0.27	0.39	0.12	1.39029e-07	1.25374e-13	0.0496215	28	29.8	29.8
Nptx1	0.1	0.14	0.39	0.25	0.442541	0.0352387		7.1	5.7	5.7
Bub1b	0.13	0.69	0.39	-0.3	0.00133261	0.096596		4.2	9	9
Ugdh	0.43	0.13	0.39	0.27	0.0349084	5.43716e-12	6.00482e-06	31.6	31	31
Ncapd2	0.28	0.75	0.39	-0.35	3.59062e-17	4.3068e-05	0.000363365	16.8	20.3	20.3
Gm28875	0.16	0.27	0.39	0.12	0.00893352	0.000247983		11.8	14	14
Sv2b	1.18	0.05	0.39	0.34	0.461579	4.47308e-10	1.23248e-07	41.4	42.7	42.7
Tor2a	0.55	0.3	0.39	0.1	4.57997e-11	1.74048e-17	0.0693209	41.4	42.9	42.9
Eif3f	2.53	0.34	0.39	0.05	3.82059e-46	1.12274e-55	0.0982445	87.8	89.8	89.8
Hes6	0.23	0.23	0.39	0.16	0.00149341	6.95128e-08	0.049155	19	20.3	20.3
Cep128	0.74	0.54	0.39	-0.15	1.80731e-13	7.47732e-07	0.0915799	30.7	30.4	30.4
Mapk13	0.11	0.24	0.39	0.15	0.110818	0.0112202		7.8	9	9
Ccnjl	1.54	0.22	0.39	0.17	1.05646e-07	3.77618e-21	9.95236e-05	63.4	61.9	61.9
Hist1h4n	0.09	0.38	0.39	0.01	0.0219625	0.0236284		5.1	10.4	10.4
Ube2t	0.07	0.64	0.39	-0.25	0.0455428	0.257616		0.8	6.8	6.8
Rps3	12.18	0.38	0.39	0.01	1.80739e-122	8.36872e-118	0.741735	99.2	99.2	99.2
Rpl4	5.1	0.46	0.39	-0.07	1.00678e-107	4.10877e-70	0.00312035	96.8	96.9	96.9
Pitpnm1	0.4	0.14	0.39	0.25	0.00955448	5.28823e-13	1.22875e-05	31.8	29.4	29.4
Itga5	0.11	0.24	0.39	0.15	0.130895	0.0162361		7.6	8.5	8.5
Cacna1f	0.1	0.27	0.39	0.12	0.147358	0.0391358		5.6	7.4	7.4
Fmn1	0.12	0.39	0.39	0	0.00688526	0.00933973		6.9	11.4	11.4
Etv6	3.15	0.19	0.39	0.19	1.01053e-08	4.81542e-30	4.66937e-08	83.4	81	81
4931406P16Rik	0.93	0.23	0.39	0.16	9.53708e-08	7.42621e-20	0.000374111	52.8	53.8	53.8
Ifi203	0.14	0.49	0.39	-0.1	0.0318375	0.108292		2.9	6.3	6.3
Hypk	1.04	0.24	0.39	0.14	3.38072e-12	3.50545e-28	0.000105045	61.2	63.1	63.1
Samd4	1.2	0.19	0.39	0.19	0.00138705	1.04866e-10	0.00290433	45.4	42.9	42.9
Atp5b	4.7	0.45	0.39	-0.07	3.24566e-107	3.82661e-71	0.00570367	96.6	97.4	97.4
Rrp15	0.26	0.38	0.39	0	1.04998e-08	3.23877e-08	0.97978	18.3	23.3	23.3
Tomm6	3.09	0.22	0.39	0.17	2.88677e-22	7.86501e-66	1.73771e-13	91.6	92.2	92.2
Tmem9	0.81	0.24	0.39	0.15	1.43568e-09	2.17878e-22	0.000476609	52.6	54.1	54.1
Abcc4	0.14	0.36	0.39	0.03	0.0173717	0.013599		7.1	11.3	11.3
Pafah1b3	0.81	0.42	0.39	-0.03	3.76194e-25	8.75217e-20	0.605401	50.2	55.5	55.5
Gpaa1	0.36	0.31	0.39	0.08	2.71556e-09	7.06471e-13	0.263761	28.2	30.6	30.6
Trmt112	1.5	0.27	0.39	0.11	1.54282e-20	8.01161e-38	0.000468976	74.4	76.1	76.1
Smyd2	0.36	0.15	0.39	0.23	0.00843246	1.20758e-11	0.000103442	28.2	27.2	27.2
Ptges	0.16	0.23	0.39	0.16	0.0614752	0.00195765		10.7	11.7	11.7
Pole	0.09	0.61	0.39	-0.23	0.0181599	0.165508		2.2	7.8	7.8
Ddx19a	0.55	0.3	0.39	0.09	2.21917e-10	1.75128e-15	0.132306	38.8	41.9	41.9
Gm41639	0.22	0.13	0.39	0.25	0.194909	0.000135626	0.0234552	15.4	14.2	14.2
Prmt7	0.44	0.41	0.39	-0.03	4.36581e-13	1.14057e-10	0.78109	28	31.9	31.9
Tnfaip3	0.15	0.25	0.39	0.13	0.0554794	0.00412736		9.4	11.1	11.1
Rplp2	12	0.4	0.39	-0.01	2.67108e-135	3.60416e-117	0.654803	99.5	99.2	99.2
Txndc12	0.95	0.45	0.39	-0.06	1.32168e-29	2.8501e-20	0.23803	55.4	58.6	58.6
Efemp1	7.39	0.21	0.39	0.17	5.5848e-22	1.14053e-66	3.09669e-14	97.8	96.7	96.7
Ang	0.15	0.23	0.39	0.16	0.0421151	0.000624081		11.7	12.3	12.3
Erc2	0.4	0.14	0.39	0.24	0.135741	2.90572e-05	0.0151238	19.5	19	19
Rpa3	0.23	0.43	0.39	-0.04	1.93826e-09	2.19221e-07	0.725976	16.8	22.6	22.6
S100a3	0.13	0.31	0.39	0.08	0.0592206	0.0207139		8.8	8.5	8.5
Taf12	0.59	0.36	0.39	0.02	1.97598e-14	4.58193e-15	0.739108	39.6	43.1	43.1
Gpi1	2.17	0.24	0.39	0.14	1.09636e-18	1.01698e-43	7.54211e-07	83.2	84	84
Rasgrf2	0.17	0.25	0.38	0.13	0.0900668	0.0103503		8.9	9	9
Vasp	0.45	0.39	0.38	-0.01	4.13083e-14	2.38205e-12	0.914159	31.8	35.5	35.5
Fundc2	1.44	0.29	0.38	0.09	7.79316e-21	4.6509e-33	0.0103218	72.9	72.4	72.4
Borcs8	0.43	0.18	0.38	0.2	0.00051142	1.0006e-13	0.00019782	34.3	32.1	32.1
Morn1	0.23	0.39	0.38	0	4.74716e-06	1.49086e-05	0.983154	14.8	18.8	18.8
Apex1	0.29	0.37	0.38	0.01	4.04316e-10	6.94664e-10	0.919392	22.4	26.1	26.1
Zfand4	0.13	0.47	0.38	-0.09	0.00619689	0.0364051		5.9	10.1	10.1
Slc24a2	0.42	0.67	0.38	-0.29	1.82516e-08	0.00305873	0.0421331	12.9	16.8	16.8
Sh3d21	0.13	0.24	0.38	0.15	0.101911	0.00839786		8.2	10	10
Slc39a14	0.37	0.21	0.38	0.17	0.000943642	1.30609e-09	0.0120941	26.7	25.9	25.9
Mybbp1a	0.53	0.28	0.38	0.1	1.67878e-08	4.27545e-14	0.0786262	36.8	39.3	39.3
Hcfc1r1	2.19	0.19	0.38	0.19	8.88829e-13	3.49756e-48	3.97963e-13	85.8	84	84
Ccdc114	0.31	0.38	0.38	0	4.2486e-08	1.45204e-07	0.993676	21.1	23.2	23.2
Ciao2b	0.53	0.4	0.38	-0.02	1.0492e-18	7.34362e-16	0.843387	38.9	43.5	43.5
Tnfrsf12a	0.5	0.9	0.38	-0.52	1.60964e-20	0.000384562	7.96909e-07	19.1	23.5	23.5
4833438C02Rik	0.12	0.27	0.38	0.12	0.052937	0.00625378		8.5	10.8	10.8
Prkab2	0.34	0.14	0.38	0.24	0.0169122	1.14174e-10	0.000149278	26.2	25.2	25.2
Kif24	0.2	0.75	0.38	-0.37	1.05248e-07	0.0130694	0.0258101	8.3	13.5	13.5
Inka2	0.19	0.41	0.38	-0.03	3.71462e-05	0.0002576	0.867287	12	16.9	16.9
Pdgfa	0.25	0.09	0.38	0.3	0.309849	2.14994e-06	0.000461305	19.7	16.5	16.5
Rasl11b	0.1	0.03	0.38	0.35	0.874434	0.0207483		9.5	4.5	4.5
Got2	0.47	0.17	0.38	0.22	0.00247965	1.66292e-12	0.000157895	33.2	33.3	33.3
Rrp9	0.23	0.38	0.38	0	7.36068e-08	3.27677e-07	0.983892	16.8	21.6	21.6
Dnaaf3	0.14	0.58	0.38	-0.2	8.43688e-05	0.0160169		7.3	11.6	11.6
Gng12	1.54	0.16	0.38	0.22	4.84475e-05	2.02848e-23	1.80114e-08	66.8	65	65
Tjap1	0.41	0.36	0.38	0.02	3.28363e-12	3.01153e-12	0.852044	29.6	33.3	33.3
Tln2	0.54	0.08	0.38	0.3	0.206043	1.59354e-09	5.8318e-06	31.9	29.9	29.9
Polh	0.25	0.58	0.38	-0.19	3.26805e-11	4.0883e-05	0.0647822	14.4	21	21
Pkp4	3.22	0.15	0.38	0.23	4.57231e-07	7.47802e-37	1.27974e-13	87.5	82.8	82.8
F2r	0.13	0.26	0.38	0.13	0.0517879	0.00426926		9.2	11.1	11.1
Cip2a	0.1	0.6	0.38	-0.22	0.0207585	0.170656		2.7	7.1	7.1
Rps24	20.21	0.32	0.38	0.06	3.21881e-103	1.19038e-131	0.000851789	99.8	99.7	99.7
Cog8	0.35	0.34	0.38	0.04	1.60827e-10	4.9075e-12	0.598583	26.6	30.5	30.5
Efna1	0.34	0.27	0.38	0.11	1.41906e-05	2.75529e-09	0.159342	24.8	26	26
Rps11	9.57	0.36	0.38	0.02	6.34773e-101	4.31869e-105	0.321245	99.5	99.3	99.3
Slc25a39	0.86	0.32	0.38	0.06	9.77103e-17	9.28011e-22	0.211439	55.1	57	57
Rnaseh2c	0.69	0.62	0.38	-0.24	1.72358e-36	1.11593e-12	6.8257e-06	44.5	44.7	44.7
Syne2	3.09	0.18	0.38	0.19	4.15848e-11	1.92517e-41	1.95599e-11	87.3	85.3	85.3
Tspan15	2.49	0.24	0.38	0.14	2.75514e-20	1.6057e-47	2.28e-07	87.1	86.9	86.9
Naa10	0.33	0.29	0.38	0.08	4.97766e-08	9.96895e-12	0.225564	26.1	28.3	28.3
Slc4a7	1.89	0.25	0.38	0.13	4.31559e-11	4.28036e-23	0.00174664	75	69.7	69.7
Rabgap1l	0.94	0.09	0.38	0.28	0.136509	2.63191e-10	5.47675e-06	41.1	39.3	39.3
Nceh1	0.72	0.23	0.38	0.14	6.8696e-07	1.52997e-15	0.00522136	44.7	46	46
Tmem43	0.25	0.28	0.38	0.1	4.85753e-05	8.302e-08	0.265492	19.7	21.8	21.8
Psmg2	0.59	0.36	0.38	0.01	8.36098e-15	1.38356e-14	0.866305	40.3	43.2	43.2
Ppib	3.87	0.24	0.38	0.14	6.72785e-34	1.44682e-80	4.49436e-12	96.6	96.3	96.3
Selenop	0.95	0.21	0.38	0.17	1.15235e-07	3.36923e-21	9.07414e-05	57.7	55.8	55.8
Nifk	0.47	0.43	0.38	-0.05	5.90562e-17	2.13753e-12	0.517044	32.7	36.2	36.2
Adam11	0.83	0.17	0.38	0.21	0.000150204	2.67346e-18	3.24931e-06	51.8	50	50
Chchd5	0.47	0.4	0.38	-0.02	7.51567e-16	5.98625e-13	0.771904	32.7	37.4	37.4
Adss	0.6	0.25	0.38	0.13	3.17838e-07	3.0241e-14	0.0216697	40.4	42.5	42.5
Usp18	0.63	1.2	0.38	-0.83	2.17141e-84	7.09621e-08	1.43389e-37	30.2	39.4	39.4
Ric3	0.17	0.28	0.38	0.1	0.0191362	0.00221989		10.6	12.7	12.7
Mbp	0.1	0.2	0.38	0.18	0.267227	0.0358423		6.9	7.2	7.2
Ermp1	0.55	0.15	0.38	0.22	0.00326512	1.34034e-13	2.65322e-05	39.3	38.1	38.1
Stxbp1	0.83	0.25	0.38	0.13	5.72922e-08	1.0382e-15	0.0166318	49.5	49	49
Hist1h4i	0.94	0.33	0.38	0.05	3.97446e-12	1.85408e-14	0.480228	50.2	49.4	49.4
Spag5	0.11	0.59	0.38	-0.21	0.00696733	0.111981		4.4	8.5	8.5
Rps19	12.3	0.48	0.38	-0.1	1.10339e-159	3.44368e-90	1.64054e-07	99.4	99.1	99.1
Rpl19	13.4	0.38	0.38	-0.01	2.1358e-126	3.84936e-112	0.819986	99.7	99.4	99.4
Pbx4	0.37	0.79	0.38	-0.41	1.08596e-26	2.99073e-06	2.63211e-07	21.2	25.8	25.8
Ank	0.37	0.21	0.38	0.17	0.00311151	8.7338e-08	0.0325339	24.6	24.5	24.5
Rbm22	0.69	0.36	0.38	0.01	2.08589e-17	2.74696e-17	0.838323	46	49.9	49.9
Phf5a	0.81	0.39	0.38	-0.01	1.66292e-23	3.39605e-20	0.853297	51.9	56.5	56.5
Hist1h2ac	0.27	0.6	0.38	-0.23	2.73566e-11	0.000115682	0.0343571	14.1	20.3	20.3
Pard6g	0.22	0.33	0.38	0.05	0.000142635	2.46506e-05	0.713067	15.1	18.5	18.5
Ptprq	0.16	0.32	0.37	0.05	0.000874148	0.000182933		12.2	16	16
Trip10	0.29	0.19	0.37	0.18	0.00191622	1.22134e-09	0.00664917	23.5	23.4	23.4
Ddr1	6.55	0.01	0.37	0.36	0.483972	4.32512e-95	6.20413e-86	99	97	97
Esrrb	0.15	0.32	0.37	0.06	0.0559506	0.027885		7	8.9	8.9
2900060B14Rik	0.17	0.45	0.37	-0.07	3.68599e-05	0.001032		10.5	15.3	15.3
Hnrnpa1	2.43	0.47	0.37	-0.1	1.11165e-61	3.61386e-35	0.00248386	84.8	86	86
Kdelr3	0.18	0.34	0.37	0.03	0.000312114	0.000157715	0.848728	12.8	16.3	16.3
Fau	17.52	0.29	0.37	0.08	4.35346e-94	3.19008e-141	2.21097e-07	99.8	99.8	99.8
Dusp23	0.23	0.42	0.37	-0.05	7.42475e-08	5.77894e-06	0.696128	16.2	20.8	20.8
Fxyd1	15.55	0.22	0.37	0.16	2.0085e-32	3.89107e-88	3.61153e-16	99.7	99	99
Coro1c	0.62	0.28	0.37	0.09	2.80188e-08	7.68945e-13	0.143442	39.9	41.6	41.6
Atp5g1	2.53	0.21	0.37	0.17	1.92756e-16	7.74931e-49	2.40445e-10	88.9	88.9	88.9
Rpa2	0.27	0.48	0.37	-0.1	9.55445e-12	4.80828e-07	0.265123	20.2	22.8	22.8
Reep2	0.3	0.25	0.37	0.12	2.84438e-05	1.81131e-09	0.105782	23.7	24.1	24.1
Clu	71.91	0.15	0.37	0.22	2.51062e-24	9.51788e-136	2.50868e-49	99.9	99.8	99.8
Polr2j	1.26	0.25	0.37	0.13	4.78762e-15	6.82076e-32	0.000152004	70.3	72	72
Uckl1	0.32	0.34	0.37	0.03	1.95777e-09	4.09557e-10	0.756646	24.1	27.3	27.3
Tmed3	0.77	0.36	0.37	0.01	2.45987e-19	3.73389e-19	0.835264	51.1	54.1	54.1
Lyst	1.64	0.15	0.37	0.22	2.76957e-05	7.3693e-27	3.97493e-10	71.3	69.8	69.8
1110038F14Rik	0.87	0.19	0.37	0.18	1.24285e-06	2.15268e-21	1.06743e-05	55.7	55.8	55.8
Prnp	4.82	0.16	0.37	0.21	1.24052e-15	2.67144e-75	1.51427e-24	97.7	96.1	96.1
Igsf9	0.1	0.47	0.37	-0.09	0.0167787	0.0734864		3.9	9.5	9.5
Gm11110	0.1	0.34	0.37	0.03	0.0535891	0.0415552		5.5	9.7	9.7
Luzp1	1.53	0.19	0.37	0.18	2.39132e-06	1.26087e-20	1.40303e-05	64.5	64	64
Tcim	0.22	0.26	0.37	0.11	0.00594059	0.000121735	0.371242	15.5	16.1	16.1
Slc6a17	0.11	0.19	0.37	0.18	0.210362	0.0129638		9	8.9	8.9
Tenm2	3.31	0.13	0.37	0.24	0.0350769	1.54872e-10	5.90474e-05	58.8	60.2	60.2
Carhsp1	0.79	0.44	0.37	-0.07	1.85521e-26	3.11129e-17	0.188802	48.6	54.4	54.4
Mpped2	1.35	-0.18	0.37	0.55	0.00195319	1.49255e-11	6.31115e-23	50.3	43.9	43.9
H2afv	4.83	0.43	0.37	-0.06	9.04478e-77	2.50413e-52	0.0360683	97.9	96.7	96.7
Gar1	0.31	0.47	0.37	-0.1	8.83049e-16	1.52181e-09	0.206295	23.1	28.2	28.2
1810058I24Rik	0.92	0.23	0.37	0.14	8.07266e-10	2.20093e-22	0.000686337	58.3	58.3	58.3
Sf3a2	0.35	0.33	0.37	0.04	1.03521e-10	6.68802e-12	0.65756	27	30.5	30.5
Arid5b	4.81	0.21	0.37	0.16	2.15553e-13	4.24852e-36	3.71019e-07	90.7	90.4	90.4
Dipk1b	0.28	0.19	0.37	0.18	0.000847952	1.987e-10	0.00564142	24.6	24	24
Cmbl	0.44	0.31	0.37	0.06	1.85426e-08	1.12271e-10	0.447464	30.6	33.6	33.6
Gm38560	0.1	0.39	0.37	-0.02	0.0372582	0.0575401		4.7	9.4	9.4
Eef2kmt	0.34	0.3	0.37	0.07	9.52067e-08	2.0342e-10	0.361401	25.9	28.2	28.2
Skp1a	2.71	0.14	0.37	0.23	7.05331e-09	1.08332e-54	1.67531e-21	91	88.8	88.8
Sfxn3	0.23	0.27	0.37	0.1	0.000116491	3.58413e-07	0.293819	18.4	20.5	20.5
2310009A05Rik	0.6	0.34	0.37	0.02	8.24795e-15	1.78462e-15	0.731938	42.3	46	46
Smim13	0.33	0.25	0.37	0.11	3.58676e-05	4.85727e-09	0.130354	24.7	25.7	25.7
Med9	0.61	0.35	0.37	0.02	3.65813e-15	1.23094e-15	0.76024	42.6	46.5	46.5
Pole2	0.09	0.62	0.37	-0.25	0.00434116	0.115782		2.6	9.8	9.8
Slc7a6	0.17	0.38	0.37	-0.01	0.000631869	0.00142732		10.9	14.8	14.8
Nbdy	0.82	0.13	0.37	0.24	0.00174498	2.12466e-20	5.99205e-09	53.2	52.5	52.5
Cyth2	0.59	0.38	0.37	-0.01	3.63039e-17	7.13706e-15	0.890049	42	45.9	45.9
Psmc3ip	0.18	0.55	0.37	-0.18	5.97393e-08	0.000674927		10.9	17.7	17.7
Rplp1	27	0.39	0.37	-0.03	1.24697e-168	1.2793e-134	0.155877	99.9	99.8	99.8
Tmem242	0.57	0.33	0.37	0.03	4.97901e-13	1.73004e-14	0.605401	39.9	43	43
Cadm4	0.18	0.18	0.37	0.19	0.0529958	7.24179e-05	0.0769913	15.4	14.9	14.9
F11r	0.85	0.44	0.37	-0.07	3.09609e-20	2.29873e-13	0.274131	45.2	51.2	51.2
Hyal2	0.18	0.24	0.37	0.13	0.00427434	1.66959e-05	0.222509	15.6	17	17
Gm29260	4.21	0.05	0.37	0.32	0.265077	1.9617e-19	1.55046e-14	76.1	73.1	73.1
Ctsz	1.17	0.26	0.37	0.1	1.02151e-15	9.00212e-28	0.00532188	66.2	68.1	68.1
Cln6	0.24	0.28	0.37	0.08	3.4338e-05	1.9729e-07	0.36541	19.7	20.9	20.9
Ankrd28	4.33	0.16	0.37	0.2	2.80624e-09	4.59745e-40	1.10314e-12	93.2	90.6	90.6
Rel	0.31	0.41	0.37	-0.04	5.34906e-08	3.65437e-06	0.719728	19.5	22.9	22.9
Gsdme	0.5	0.25	0.37	0.11	1.17666e-05	5.72344e-10	0.105573	32.8	32	32
Smim3	0.28	0.2	0.37	0.17	0.004273	1.14642e-07	0.0289932	21.7	21.3	21.3
Bola3	1.37	0.22	0.37	0.15	5.4033e-12	1.08664e-30	8.76161e-06	70.9	71.2	71.2
Bbc3	0.11	0.46	0.37	-0.1	0.00545982	0.0393348		4.9	11.6	11.6
H2afj	1.36	0.22	0.37	0.15	1.12811e-10	1.30994e-26	5.44804e-05	69.8	67.6	67.6
Prim1	0.25	0.68	0.37	-0.31	3.19409e-14	0.000148057	0.00220264	14.5	20.7	20.7
Smim8	0.97	0.24	0.37	0.12	1.30776e-10	5.655e-22	0.00247141	58.5	59.1	59.1
Rbmxl1	0.86	0.38	0.37	-0.01	2.14988e-21	1.97991e-18	0.863195	53.8	55.7	55.7
Gucy1a2	1.09	0.15	0.37	0.21	0.0161003	5.74502e-09	0.00180188	40.7	41.3	41.3
Lpin1	0.3	0.19	0.37	0.17	0.00348914	2.51142e-08	0.0167071	23.2	23.1	23.1
Ddx18	0.93	0.36	0.36	0.01	5.19932e-21	6.81105e-20	0.937915	55.7	58.7	58.7
Hist1h4m	0.1	0.32	0.36	0.05	0.0507522	0.0304195		6.4	9.7	9.7
Uqcr10	4.07	0.2	0.36	0.17	7.42668e-23	2.30722e-73	2.06887e-16	96.5	95.2	95.2
Cox7c	7.62	0.21	0.36	0.16	2.04091e-38	4.95052e-111	1.63496e-21	99.4	98.7	98.7
Iqcg	0.14	0.4	0.36	-0.03	0.00251752	0.00844761		8.2	13.1	13.1
Kif27	0.17	0.57	0.36	-0.2	7.12508e-06	0.00735422		8.6	14.7	14.7
Irx5	1.58	0.24	0.36	0.12	3.14655e-12	6.62353e-25	0.00151651	70.9	69.4	69.4
Myl12b	2.65	0.17	0.36	0.19	8.32509e-13	1.77873e-53	8.26541e-16	90.5	89.4	89.4
Ndufaf8	1.24	0.27	0.36	0.1	1.75627e-15	1.466e-26	0.00936551	67.1	68.6	68.6
Nab1	0.51	0.23	0.36	0.13	3.16546e-05	1.34646e-10	0.0414188	34	35.1	35.1
Hnrnpa0	4.18	0.43	0.36	-0.06	1.03973e-87	3.26012e-58	0.013605	96.4	96.7	96.7
Fxn	0.24	0.45	0.36	-0.08	4.36325e-09	6.3581e-06	0.43252	16.4	21.7	21.7
Hspa1a	0.27	0.79	0.36	-0.43	3.88744e-11	0.00585998	0.00146476	10	16.2	16.2
Dbf4	0.13	0.65	0.36	-0.29	0.00251499	0.124052		4.7	8.3	8.3
Pipox	0.37	0.14	0.36	0.22	0.023724	1.06802e-09	0.00035612	27.9	26.6	26.6
Ndufa5	2.42	0.24	0.36	0.13	2.52812e-23	9.7132e-51	6.14553e-07	89.1	89.4	89.4
Lrrc9	0.12	0.54	0.36	-0.17	0.00741924	0.0927023		3.8	9.9	9.9
Ifi27l2a	0.15	0.86	0.36	-0.5	0.00079853	0.200246		2.7	8.2	8.2
Plpbp	0.58	0.32	0.36	0.04	4.25157e-12	9.01787e-14	0.569392	39.8	42.8	42.8
9530077C05Rik	0.39	0.54	0.36	-0.18	6.71452e-20	1.18077e-08	0.00946385	25.8	31.3	31.3
Stoml2	0.74	0.39	0.36	-0.03	9.93531e-23	1.27891e-17	0.593603	49.3	53.5	53.5
Stk40	0.62	0.2	0.36	0.16	0.000200477	4.11755e-11	0.00847411	41	39.4	39.4
Ctsa	0.59	0.26	0.36	0.1	7.46356e-09	4.91997e-15	0.05789	41.4	44.2	44.2
Impdh2	0.58	0.5	0.36	-0.14	1.09678e-27	3.78457e-13	0.00703737	39.1	45.3	45.3
Ndufaf5	0.36	0.19	0.36	0.18	0.00280323	5.99787e-09	0.0101485	27	26.8	26.8
Rorc	0.43	0.16	0.36	0.2	0.00349566	1.44077e-11	0.000347823	31.7	31.6	31.6
Eml3	0.37	0.21	0.36	0.16	0.000145202	3.33791e-11	0.00953799	29.6	28.8	28.8
B130024G19Rik	0.33	0.21	0.36	0.15	0.0567651	0.00118931	0.272455	15.5	15.9	15.9
Cbx3	3.67	0.28	0.36	0.08	3.17375e-35	1.92373e-54	0.00127627	94.9	94.4	94.4
Nfatc1	0.16	0.19	0.36	0.18	0.119224	0.00237625		11.9	11.7	11.7
Colgalt1	0.37	0.23	0.36	0.13	2.50916e-05	1.00271e-10	0.0422622	29	29.3	29.3
Nucb1	0.7	0.22	0.36	0.14	7.1582e-07	3.36461e-16	0.00285307	47.4	47.8	47.8
Bbs5	0.27	0.32	0.36	0.04	2.69976e-05	7.38215e-06	0.778491	17.6	20.5	20.5
Haus4	0.25	0.52	0.36	-0.16	2.129e-10	3.95934e-05	0.114629	16.8	20.7	20.7
Ano6	1.92	0.07	0.36	0.29	0.0723641	1.38728e-23	2.91058e-15	72.3	69.4	69.4
Rad51	0.12	0.63	0.36	-0.27	0.000781154	0.0764822		5.4	10.1	10.1
Epb41l4aos	0.65	0.33	0.36	0.03	1.45961e-12	1.11113e-13	0.664214	42.8	45.7	45.7
Sytl2	0.13	0.24	0.36	0.12	0.0889412	0.0130177		8.9	10.1	10.1
Ndufa3	3.45	0.16	0.36	0.2	7.10181e-15	6.12206e-66	3.38869e-20	94.2	93.2	93.2
Atp5l	5.51	0.19	0.36	0.17	2.36212e-25	1.45527e-86	1.59174e-20	98.2	97.8	97.8
Necab2	2.1	0.22	0.36	0.14	0.000265976	6.49023e-09	0.0562472	50.3	55.1	55.1
Fkbp1a	1.76	0.17	0.36	0.19	2.50581e-09	3.01544e-36	1.81829e-10	80.1	78.2	78.2
Tnfrsf1a	1.01	0.24	0.36	0.12	2.65494e-10	1.39247e-20	0.00516188	59.8	60	60
Cplx3	0.23	0.53	0.36	-0.17	7.83266e-14	1.98306e-06	0.0468423	15.5	24.1	24.1
Tff2	0.42	-0.1	0.36	0.46	0.161124	3.02826e-07	4.23406e-11	29.2	22.4	22.4
Gm11837	0.2	0.66	0.36	-0.31	2.82969e-10	0.0017098	0.0121308	10.9	18	18
Cep135	0.22	0.45	0.36	-0.09	3.30215e-06	0.000530276	0.493622	13.4	17.3	17.3
Eef2k	0.17	0.26	0.36	0.1	0.0135109	0.000671688		13.4	14.5	14.5
Wdr27	0.21	0.33	0.36	0.03	0.000163366	9.28524e-05	0.862437	14.6	17.6	17.6
Map2k3	0.37	0.22	0.36	0.14	0.000173166	2.11026e-09	0.0456467	27.9	27.8	27.8
Nfya	0.26	0.38	0.36	-0.02	1.67346e-07	1.9409e-06	0.889608	18.1	22.4	22.4
Ppih	0.32	0.33	0.36	0.02	3.1938e-09	1.04332e-09	0.796787	24.5	27.6	27.6
Rab5if	1.14	0.3	0.36	0.06	4.33638e-19	1.54543e-25	0.13519	65.8	68.4	68.4
Prmt5	0.36	0.36	0.36	-0.01	8.37585e-11	9.81089e-10	0.961777	26.2	30.2	30.2
Plk5	0.13	0.33	0.36	0.03	0.019289	0.0146231		7.9	11.7	11.7
Coq8b	0.45	0.27	0.36	0.09	1.11131e-06	4.12758e-10	0.220683	31.6	32.5	32.5
Mrpl24	1.11	0.47	0.36	-0.11	1.90416e-38	1.57283e-20	0.00831589	61.9	65.9	65.9
Kif20a	0.1	0.67	0.36	-0.31	0.0397554	0.309356		1.9	5.8	5.8
Tnfsf12	1.03	0.26	0.36	0.09	3.20181e-13	3.12931e-22	0.0224654	61.4	62.4	62.4
Kmt5a	0.46	0.55	0.36	-0.19	4.5182e-21	1.35989e-08	0.00402959	30.5	33	33
Romo1	4.02	0.1	0.36	0.25	2.16107e-07	6.07248e-74	5.97264e-37	96.2	94.5	94.5
Zfp36l1	14.89	0.18	0.36	0.18	2.12098e-10	2.16603e-36	9.09633e-10	98.9	97.2	97.2
Htr1f	0.37	0.4	0.36	-0.04	4.90104e-15	3.71019e-11	0.56435	28.1	33.1	33.1
Znhit1	0.46	0.38	0.36	-0.02	2.15553e-13	3.9628e-11	0.821609	32.1	35.9	35.9
Ccnl1	1.66	0.38	0.36	-0.03	1.163e-33	1.71008e-26	0.543365	73.7	76.7	76.7
Hdgf	3.26	0.47	0.36	-0.11	3.85645e-68	5.20903e-36	0.000206791	91.7	90.1	90.1
Gng5	10.54	0.16	0.36	0.19	8.69519e-26	1.41005e-110	2.17554e-32	99.5	99	99
Mettl21a	0.31	0.24	0.36	0.11	2.91799e-05	2.18046e-09	0.110878	24.3	25.9	25.9
Rpl18a	13.25	0.32	0.36	0.04	2.2682e-85	1.58038e-97	0.0730394	99.7	99.4	99.4
Rfc4	0.2	0.53	0.36	-0.17	9.27176e-09	0.000317677	0.129515	13.4	18.3	18.3
Raly	1.52	0.39	0.36	-0.04	9.14702e-37	8.01324e-28	0.41012	74.5	75.3	75.3
Ubxn8	0.38	0.16	0.36	0.19	0.00448269	2.7393e-10	0.00133935	29.4	28.7	28.7
Ado	0.18	0.36	0.36	-0.01	8.27447e-05	0.00021937		12.8	17.6	17.6
Oard1	0.74	0.3	0.36	0.06	1.29587e-12	1.67001e-16	0.273962	49.5	51.5	51.5
Hist1h4c	0.42	0.42	0.36	-0.07	2.87479e-16	8.64694e-11	0.336811	30.3	34.6	34.6
Sin3b	1.11	0.19	0.36	0.16	3.0581e-08	5.50198e-24	1.50382e-05	64.4	63.9	63.9
Atad5	0.34	0.57	0.35	-0.21	2.46098e-12	4.33802e-05	0.0278155	20.5	22.6	22.6
Ephb3	0.38	0.26	0.35	0.1	2.89008e-06	2.58629e-10	0.143826	29.1	30.2	30.2
Snhg15	0.11	0.39	0.35	-0.03	0.013014	0.0301922		6.5	11.3	11.3
Ccndbp1	0.61	0.32	0.35	0.03	8.97756e-13	3.01756e-14	0.60366	42.6	45.1	45.1
Glrx	0.28	0.24	0.35	0.12	0.000197268	6.08566e-08	0.140359	22.7	22.8	22.8
Tpi1	5.25	0.3	0.35	0.06	3.24591e-40	2.9187e-53	0.0269505	97.3	96.6	96.6
1810044D09Rik	0.14	0.3	0.35	0.05	0.0147071	0.00574042		9.9	12.6	12.6
Slc30a10	0.27	0.21	0.35	0.14	0.00325103	9.34808e-07	0.0865305	20.7	21	21
Rsph1	0.1	0.63	0.35	-0.28	0.0491069	0.302627		0.4	7.2	7.2
Gm9929	0.13	0.29	0.35	0.06	0.0548512	0.0247239		8	10.1	10.1
Nuak2	0.23	0.3	0.35	0.06	0.000325704	3.16561e-05	0.632746	17	18.5	18.5
Ccnyl1	0.46	0.26	0.35	0.1	3.8393e-05	3.7049e-08	0.229146	29.9	30.9	30.9
Rpl15	11.31	0.29	0.35	0.07	9.60773e-71	2.40134e-99	0.000222964	99.6	99.4	99.4
Ak1	0.43	0.26	0.35	0.09	8.82916e-07	9.92399e-11	0.165123	32.8	32.3	32.3
Pold2	0.18	0.44	0.35	-0.08	2.89102e-06	0.000369824		12.6	18	18
Eef1b2	5.3	0.28	0.35	0.07	9.78385e-47	2.93467e-68	0.00109044	96.9	96.2	96.2
Cycs	0.93	0.34	0.35	0.01	4.44245e-18	6.48847e-18	0.844756	56.8	58.3	58.3
Hist1h1a	0.09	0.48	0.35	-0.12	0.0461254	0.164554		3.7	7.3	7.3
Sqstm1	3.01	0.42	0.35	-0.07	1.19967e-49	7.83555e-32	0.0456078	87.1	88.3	88.3
Rpl30	18.35	0.23	0.35	0.13	4.00815e-57	2.24529e-127	6.49049e-17	99.7	99.6	99.6
Lmbr1l	0.34	0.21	0.35	0.14	0.000217739	1.68923e-09	0.036712	26.3	26.7	26.7
Rpl17	14.63	0.34	0.35	0.01	1.26584e-103	2.79634e-100	0.728208	99.7	99.3	99.3
Tpm3	2.03	0.32	0.35	0.03	1.76961e-27	4.7634e-31	0.396441	80.7	79.7	79.7
Utp20	0.31	0.33	0.35	0.02	1.47886e-06	7.09149e-07	0.838323	21.5	24	24
Bcam	0.09	0.31	0.35	0.05	0.0648491	0.0401165		6.4	9.6	9.6
C1d	0.81	0.23	0.35	0.12	5.76419e-09	4.41532e-19	0.00364129	54.1	55.7	55.7
Mdk	2.16	0.21	0.35	0.14	1.76813e-11	1.1648e-28	2.57055e-05	80.3	78.5	78.5
Pgam1	3.43	0.27	0.35	0.09	1.29567e-32	1.791e-52	0.000676958	94.3	93.3	93.3
Dxo	0.23	0.35	0.35	0	3.91253e-07	9.21061e-07	0.978476	18	22.1	22.1
Exoc4	9.06	0.38	0.35	-0.03	1.67868e-55	2.62823e-44	0.456682	98.7	97.7	97.7
Ano1	2.98	-0.62	0.35	0.97	1.87957e-34	1.51706e-11	5.58881e-78	66.8	52.4	52.4
Mrps11	0.53	0.32	0.35	0.03	1.86631e-12	2.6597e-13	0.70578	39	41.8	41.8
Fbxl6	0.21	0.21	0.35	0.14	0.00603223	3.8448e-06	0.104427	18.5	18.3	18.3
Lipa	0.41	0.14	0.35	0.21	0.0174685	1.92331e-09	0.000773293	30.4	28.6	28.6
Rrm1	0.38	0.65	0.35	-0.3	4.91426e-24	5.42121e-07	2.30294e-05	26.3	29.9	29.9
Nudt9	0.52	0.25	0.35	0.1	8.34633e-08	2.35002e-13	0.0708638	39.4	41.4	41.4
Faim	0.73	0.24	0.35	0.11	1.54945e-08	1.80586e-15	0.0340555	49.3	49.7	49.7
Ptpn14	0.52	0.27	0.35	0.08	6.58279e-07	4.79296e-10	0.266132	34.9	36.1	36.1
Oscp1	0.35	0.39	0.35	-0.04	5.27167e-11	2.56832e-08	0.647457	24.6	28.3	28.3
Bcap31	1.51	0.22	0.35	0.13	5.89455e-14	3.40322e-32	3.29399e-05	75.2	75.4	75.4
Mrpl57	0.74	0.26	0.35	0.09	6.224e-10	1.59393e-16	0.0555303	50.6	51.3	51.3
Ggt1	0.17	0.2	0.35	0.15	0.0360206	0.00034655		14.4	14.6	14.6
Bbof1	0.25	0.32	0.35	0.03	0.000271139	0.000107422	0.819431	16	18.2	18.2
Ppp1ca	1.7	0.29	0.35	0.06	7.0781e-25	1.33432e-32	0.10615	78.3	80.4	80.4
Rnf126	0.28	0.32	0.35	0.03	8.05756e-08	2.50752e-08	0.795256	22.2	24.9	24.9
Dusp10	0.44	0.3	0.35	0.05	2.72586e-06	1.47514e-07	0.604716	28.4	28.7	28.7
Cnot3	1.23	0.28	0.35	0.06	4.34715e-18	8.84862e-25	0.116823	67.2	68.7	68.7
Ets1	0.13	0.33	0.35	0.02	0.0378392	0.0364607		7.2	9.4	9.4
Gls	1.49	0.25	0.35	0.1	7.42696e-12	2.35552e-21	0.0129995	67.7	68.6	68.6
Snrnp25	0.36	0.43	0.35	-0.09	3.12953e-17	2.1579e-10	0.186272	27.4	32.9	32.9
Fmn2	0.49	0.36	0.35	-0.01	2.88899e-06	1.43936e-05	0.945932	24.6	26.8	26.8
Bloc1s1	1.24	0.2	0.35	0.14	5.44051e-10	6.10038e-26	3.78431e-05	67.8	68.4	68.4
Tmem230	0.66	0.21	0.35	0.14	2.13792e-06	1.06361e-14	0.00554997	46.1	46.3	46.3
Serping1	3.92	-0.17	0.35	0.51	2.29241e-07	8.38031e-27	1.98844e-56	85.7	82.9	82.9
Tmem138	0.26	0.44	0.35	-0.09	2.03878e-09	7.86343e-06	0.353735	18.1	22.2	22.2
Ppie	0.49	0.32	0.34	0.03	5.55033e-11	8.57547e-12	0.717306	35	39.3	39.3
Podxl2	0.36	0.06	0.34	0.29	0.332653	3.60864e-10	3.28657e-07	30.4	26.7	26.7
Ruvbl2	0.49	0.55	0.34	-0.21	3.32357e-28	2.523e-10	0.000191243	34	39.2	39.2
Ubl5	5.45	0.18	0.34	0.16	6.53912e-25	2.58382e-83	2.36213e-19	98.4	98.1	98.1
Cfl1	5.05	0.41	0.34	-0.07	2.30288e-82	8.81054e-53	0.00778517	97	97.2	97.2
Msrb1	0.62	0.14	0.34	0.2	0.00238739	1.5241e-14	1.20766e-05	45.4	44.2	44.2
Rpl35	8.9	0.21	0.34	0.14	2.86672e-36	8.30541e-91	1.08394e-14	99.2	98.7	98.7
Ptges2	0.18	0.22	0.34	0.12	0.0156505	0.000243545		14.6	15.6	15.6
Gins2	0.11	0.51	0.34	-0.16	0.00186433	0.0492069		6.2	11.5	11.5
Tra2b	2.17	0.41	0.34	-0.06	3.63629e-48	3.42867e-31	0.0593445	82.3	84.8	84.8
Gnl3	0.48	0.5	0.34	-0.15	1.09625e-20	2.05702e-09	0.0135601	32.5	37	37
Cmc2	0.38	0.42	0.34	-0.08	1.43261e-13	1.63309e-08	0.295493	28.5	30.5	30.5
Ets2	0.61	0.25	0.34	0.1	1.62732e-06	5.79251e-11	0.115486	39.5	40.5	40.5
Plcxd2	0.14	0.25	0.34	0.09	0.0700256	0.0148702		9.5	10.7	10.7
Znrd2	0.48	0.41	0.34	-0.07	7.52362e-18	1.14514e-11	0.297809	35.1	39.6	39.6
Rpp38	0.18	0.32	0.34	0.02	0.000881235	0.000627562		12.9	16.2	16.2
Spg21	0.83	0.21	0.34	0.13	7.83096e-08	6.86723e-18	0.00246332	53.6	55.2	55.2
Ttc9	0.5	0.28	0.34	0.07	6.93131e-07	2.6233e-09	0.377887	34	35	35
Uqcrh	5.58	0.21	0.34	0.13	8.32547e-33	1.53429e-79	2.5099e-12	98.3	98.3	98.3
Fhod3	0.21	0.23	0.34	0.12	0.0875221	0.0107347	0.510286	11.1	11	11
Ssu72	1.76	0.16	0.34	0.18	1.99889e-08	6.21556e-32	3.51542e-09	80.9	79	79
Tmem94	0.35	0.21	0.34	0.14	0.000216033	1.18627e-09	0.0321067	27.9	27.9	27.9
Clba1	0.11	0.27	0.34	0.07	0.0591372	0.0189345		8.6	10.6	10.6
D830025C05Rik	0.16	0.29	0.34	0.05	0.0116224	0.0038203		11.5	14	14
Gfer	0.24	0.34	0.34	0	6.25834e-07	2.07915e-06	0.992874	18.7	22.1	22.1
Wdr73	0.31	0.31	0.34	0.03	6.57439e-07	1.2086e-07	0.739108	23.5	25.2	25.2
Trim30a	1.79	0.8	0.34	-0.46	2.66751e-69	5.8002e-12	1.36855e-21	60.7	62.6	62.6
Trib1	1.08	0.49	0.34	-0.15	3.32155e-20	2.24261e-09	0.0166588	51	48.4	48.4
Zfp521	1.82	0.02	0.34	0.32	0.686196	2.13535e-18	4.14561e-16	68.4	65.1	65.1
Jagn1	0.44	0.24	0.34	0.1	8.8341e-07	4.95891e-12	0.0697873	34.8	36.2	36.2
G2e3	0.74	0.49	0.34	-0.15	7.42057e-22	7.29968e-10	0.00991528	44.8	43.8	43.8
Prkab1	0.19	0.26	0.34	0.08	0.00274722	0.000130717	0.500975	15.5	16.8	16.8
Rbm17	0.77	0.32	0.34	0.02	3.66322e-15	9.58854e-16	0.74677	51	53.3	53.3
Chaf1a	0.11	0.44	0.34	-0.1	0.0056142	0.045795		7.2	10.4	10.4
Snhg6	0.46	0.26	0.34	0.08	3.13463e-07	1.36119e-10	0.243281	34.1	36.8	36.8
Mrpl52	2.43	0.26	0.34	0.08	1.36954e-26	3.68524e-42	0.00337649	87.9	89	89
Ccdc65	0.2	0.33	0.34	0.01	0.000143653	0.000167705	0.94651	14.7	17.9	17.9
Basp1	9.26	0.12	0.34	0.23	2.55343e-09	6.62601e-70	8.47135e-31	99	97.8	97.8
Nagk	0.73	0.21	0.34	0.13	2.66384e-06	1.3167e-14	0.0054652	48.8	48.7	48.7
Lamc1	0.83	0.24	0.34	0.1	4.9136e-07	5.23745e-12	0.0935297	46.8	47.5	47.5
Klhl18	0.46	0.21	0.34	0.13	0.000337564	2.04862e-08	0.0728456	30	30.3	30.3
Hmga1	0.39	0.19	0.34	0.15	0.00170967	1.18684e-08	0.0207882	29.9	27.8	27.8
Gjc1	0.25	0.6	0.34	-0.26	2.00139e-12	0.000246211	0.00784897	15.2	21.5	21.5
Gtf3a	0.38	0.29	0.34	0.05	2.2907e-08	1.82524e-10	0.470397	30.7	31.6	31.6
Rps25	10.08	0.36	0.34	-0.02	3.43251e-112	9.63178e-92	0.380083	99.4	99.2	99.2
Lta4h	0.59	0.29	0.34	0.05	1.14042e-09	3.78745e-12	0.419015	39.9	43	43
Ndp	0.5	0.38	0.34	-0.04	6.12844e-11	2.56892e-08	0.666581	33.4	34.4	34.4
Rtl8a	0.73	0.15	0.34	0.19	0.00060923	4.34763e-16	9.97822e-06	50.3	49.2	49.2
Arf4	5.3	0.14	0.34	0.2	1.00799e-08	2.35963e-44	8.93727e-16	97.4	96.1	96.1
Apool	0.53	0.18	0.34	0.15	0.000622682	3.51027e-10	0.00927815	36.5	35.8	35.8
Eif1ad	0.4	0.33	0.34	0.01	1.49879e-10	4.64922e-10	0.952674	31.1	32.7	32.7
Myo1c	0.23	0.26	0.34	0.08	0.000657731	1.55937e-05	0.449321	18.3	19.6	19.6
Slc16a6	0.26	0.31	0.34	0.03	0.000130727	5.54246e-05	0.828417	17.9	19.4	19.4
Myo1b	0.45	0.25	0.34	0.09	0.00011121	4.1586e-07	0.307715	28.8	29.1	29.1
Naga	0.39	0.29	0.34	0.04	5.53087e-09	9.05624e-11	0.537211	30.2	32.7	32.7
Ccpg1os	0.28	0.34	0.34	-0.01	2.46504e-08	1.77604e-07	0.953475	21.4	24.8	24.8
Wfdc1	0.15	0.08	0.34	0.26	0.611892	0.0242108		11.2	9.3	9.3
Mgat2	0.44	0.26	0.34	0.08	2.67667e-07	5.58783e-11	0.206075	33.6	34.1	34.1
Plpp2	0.12	0.25	0.34	0.09	0.0652438	0.0148405		9.4	10.9	10.9
Osgin1	0.16	0.36	0.34	-0.03	0.00287628	0.0085374		11.2	13.2	13.2
Rbl1	0.31	0.61	0.34	-0.27	1.2427e-14	8.3277e-05	0.00246332	20	22.3	22.3
Polr2e	1.27	0.33	0.34	0.01	1.38893e-24	4.32783e-24	0.842755	69.2	71.8	71.8
Bola1	0.41	0.35	0.34	-0.01	8.91946e-12	2.71808e-10	0.914379	31.8	33.7	33.7
9330154J02Rik	0.12	0.17	0.34	0.16	0.305214	0.0487698		7.8	7.9	7.9
Slc19a2	0.17	0.36	0.34	-0.02	0.00103973	0.00334387		11.5	15	15
Mdm1	0.2	0.35	0.34	-0.01	0.000465616	0.00113373	0.961669	13.7	15.6	15.6
Pnpt1	0.75	0.52	0.34	-0.18	1.73978e-27	7.24314e-11	0.000649539	42.8	48.3	48.3
Tmem71	0.57	0.25	0.34	0.09	2.20514e-05	2.64118e-08	0.252478	34.4	34.5	34.5
Pole3	0.48	0.44	0.34	-0.1	2.5733e-18	3.47632e-10	0.102621	33.7	38.3	38.3
Rps7	12.88	0.21	0.34	0.13	3.14398e-40	1.57557e-97	5.06817e-15	99.4	99.3	99.3
Slfn9	0.22	0.93	0.34	-0.6	1.5929e-13	0.0170001	1.60629e-05	9.5	16.1	16.1
Bicd2	0.45	0.15	0.34	0.18	0.0113301	1.24731e-08	0.00384257	31.9	31.3	31.3
Fbxw9	0.17	0.32	0.34	0.02	0.00124264	0.00116834		12.6	15.8	15.8
Fam222a	0.13	0.23	0.34	0.11	0.103183	0.0189951		9.4	10.3	10.3
Lmo7	0.09	0.59	0.34	-0.25	0.027121	0.239614		2.4	7.7	7.7
Disc1	0.12	0.27	0.34	0.07	0.0806449	0.0347219		8.2	9.8	9.8
Arxes2	0.21	0.13	0.34	0.21	0.121749	4.6022e-05	0.0236841	18	16.2	16.2
Ap4m1	0.32	0.31	0.34	0.03	1.83161e-07	3.81456e-08	0.753051	24.7	26.5	26.5
Leprot	0.57	0.19	0.34	0.15	8.10662e-05	2.07753e-12	0.00438578	42.2	41.1	41.1
Gm17066	0.12	0.28	0.34	0.06	0.0292101	0.010507		9.6	12.1	12.1
Acvr1	1.24	0.04	0.34	0.29	0.34319	4.03175e-17	6.8449e-13	62.9	58.3	58.3
Rpl12	8.07	0.34	0.34	0	9.04892e-75	1.43649e-67	0.940168	99	98.4	98.4
Tex10	0.5	0.32	0.34	0.02	4.8958e-10	3.62519e-10	0.848035	35.2	36.9	36.9
Rad54b	0.09	0.52	0.34	-0.19	0.0317508	0.197479		3.2	8	8
Vkorc1l1	0.77	0.22	0.34	0.11	5.53579e-06	1.66558e-11	0.0490815	45.3	45.7	45.7
Ppp1r35	0.64	0.32	0.34	0.02	4.77357e-13	3.31261e-13	0.821078	44.9	47.2	47.2
Sap18b	0.1	0.35	0.34	-0.01	0.0205423	0.0340019		6.4	11.7	11.7
Pdlim3	3.11	0.43	0.33	-0.1	5.82032e-28	7.18631e-16	0.0451286	75.8	77.5	77.5
Pld3	0.73	0.19	0.33	0.15	1.5005e-05	1.9023e-14	0.00208018	48	49	49
1700037H04Rik	0.22	0.29	0.33	0.04	5.78952e-05	8.98699e-06	0.705543	18.5	20.2	20.2
Rilpl2	0.32	0.35	0.33	-0.02	2.37843e-09	6.96072e-08	0.856079	23.9	26.9	26.9
Arf5	2.78	0.17	0.33	0.16	5.71e-14	3.42736e-49	1.64124e-12	92.3	90	90
Snrnp40	0.71	0.22	0.33	0.12	1.30478e-06	2.92931e-13	0.0245563	45.8	46.9	46.9
Trim28	0.72	0.43	0.33	-0.09	1.7633e-23	3.15439e-13	0.0708284	47.7	50.4	50.4
Uap1l1	0.1	0.31	0.33	0.03	0.048673	0.0394702		7.1	10.1	10.1
Eif3d	0.94	0.42	0.33	-0.09	1.47398e-29	3.71942e-17	0.0561758	56.8	61.2	61.2
Snrnp27	1.28	0.27	0.33	0.06	1.69659e-16	8.03271e-23	0.125021	67.8	70.1	70.1
Meaf6	0.61	0.35	0.33	-0.02	8.18921e-14	1.37859e-11	0.840068	42.6	44	44
Rps13	11.8	0.29	0.33	0.05	2.54368e-75	2.17526e-93	0.0128359	99.7	99.2	99.2
Plcd1	0.25	0.31	0.33	0.02	3.1855e-06	2.04003e-06	0.866305	19.7	22.4	22.4
Larp1b	1.19	0.53	0.33	-0.2	1.04946e-26	3.57565e-10	0.000436691	47.6	55.1	55.1
Fastk	0.43	0.27	0.33	0.07	6.35841e-08	5.80504e-11	0.304027	33.5	35.5	35.5
Gm42047	2.19	0.32	0.33	0.01	7.64152e-08	8.04172e-08	0.902396	59	49.4	49.4
Cdkl5	0.22	0.37	0.33	-0.03	0.000767113	0.00378363	0.850717	11.9	15.4	15.4
Rsad2	1.1	1.3	0.33	-0.96	9.24355e-78	2.32291e-05	3.56869e-40	37.4	39.9	39.9
Anapc13	2.66	0.22	0.33	0.12	7.65499e-20	1.07496e-42	6.92952e-06	90	89	89
Pias4	0.36	0.21	0.33	0.12	0.000122917	3.15394e-09	0.0637935	28.4	28.8	28.8
Lif	0.13	0.41	0.33	-0.08	0.0211872	0.08022		6.8	9.3	9.3
Hadhb	0.79	0.19	0.33	0.15	4.64483e-06	2.61627e-16	0.000766217	52.6	53.3	53.3
Trim7	0.15	0.19	0.33	0.14	0.144837	0.0123189		10.9	10.5	10.5
1600012H06Rik	0.21	0.38	0.33	-0.04	4.05604e-07	2.2801e-05	0.697487	16.3	20.9	20.9
Acad12	0.17	0.22	0.33	0.11	0.0502344	0.003891		12.4	12.8	12.8
Gm15706	0.12	0.25	0.33	0.08	0.0679879	0.0192641		9.2	11	11
Tuba1b	8.53	0.53	0.33	-0.2	4.46805e-142	4.80759e-50	1.68889e-19	99.3	96.4	96.4
Hmgn2	2.88	0.46	0.33	-0.13	3.98101e-55	7.46143e-26	6.42983e-05	89.8	87.6	87.6
Peg13	0.16	0.24	0.33	0.09	0.0146405	0.00114231		13.5	14.8	14.8
5730419F03Rik	0.14	0.24	0.33	0.09	0.0919711	0.0231302		9.2	10.3	10.3
Rcc2	0.54	0.22	0.33	0.11	1.28288e-05	6.2642e-11	0.0493429	39.3	38.9	38.9
Peli2	0.17	0.24	0.33	0.09	0.0952167	0.0243385		9.8	10.1	10.1
Ift122	0.61	0.32	0.33	0.01	2.84549e-10	3.05074e-10	0.874156	39	41.1	41.1
Soga1	0.59	0.29	0.33	0.04	1.72179e-07	1.1237e-08	0.637259	37.2	37.4	37.4
2310039H08Rik	0.46	0.33	0.33	0.01	1.97627e-11	8.05799e-11	0.955145	34.5	37.2	37.2
Ranbp1	1.65	0.47	0.33	-0.14	3.52692e-48	1.05288e-21	9.63662e-05	75	77.1	77.1
AC149090.1	4.86	0.02	0.33	0.31	0.467706	7.36166e-54	3.20422e-47	97.3	94.2	94.2
Sec11a	1.28	0.29	0.33	0.04	8.09792e-20	5.63622e-24	0.308842	69.1	71.3	71.3
Mylk	0.12	0.3	0.33	0.03	0.0553098	0.0429819		7.5	9.7	9.7
Soga3	0.13	0.19	0.33	0.14	0.238726	0.0431159		8.8	8.7	8.7
Rpl18	10.71	0.32	0.33	0.01	9.2966e-91	3.04597e-86	0.8439	99.7	99.3	99.3
Kdm6a	2.77	0.51	0.33	-0.18	1.47037e-81	2.93316e-30	1.46298e-10	83.8	89	89
Srrm4	0.12	0.27	0.33	0.06	0.0696755	0.0350489		8.2	10.6	10.6
Neb	0.16	0.23	0.33	0.1	0.125397	0.031666		9.1	10.4	10.4
Uap1	0.34	0.32	0.33	0.01	1.49566e-08	2.30376e-08	0.925125	25.7	28.3	28.3
Cth	0.78	-0.11	0.33	0.44	0.0369378	3.22745e-11	2.71837e-18	46.9	42.6	42.6
Hmgb1	10.32	0.27	0.33	0.06	1.33043e-47	5.33275e-67	0.00292602	99.7	99.2	99.2
Pgpep1	0.52	0.28	0.33	0.05	2.79963e-09	2.37484e-11	0.481998	39	39.8	39.8
Klhl21	0.14	0.2	0.33	0.13	0.0918383	0.00546052		11.9	12.2	12.2
Pnpla6	0.37	0.02	0.33	0.31	0.773752	4.21833e-09	4.6382e-08	30.5	26.2	26.2
Ttc30b	0.16	0.33	0.33	0	0.00199713	0.00312717		11.8	14.8	14.8
Nek3	0.18	0.69	0.33	-0.36	1.62779e-06	0.0383944		9.3	11.4	11.4
Ccdc124	0.87	0.38	0.33	-0.05	1.81225e-23	2.19718e-16	0.346016	55	58.5	58.5
Zwilch	0.11	0.55	0.33	-0.22	0.00546696	0.123607		4.3	9.9	9.9
Chchd4	0.29	0.33	0.33	0	9.64807e-08	2.81771e-07	0.988341	22	25.3	25.3
Dna2	0.1	0.42	0.33	-0.09	0.0343695	0.120363		5.1	8.7	8.7
Plekhg2	0.27	0.12	0.33	0.21	0.084336	1.8795e-06	0.00562802	23.3	20.5	20.5
Rbbp4	1.95	0.31	0.33	0.02	3.0349e-29	1.40825e-29	0.73071	82.1	82.5	82.5
Rpl27a	17.1	0.3	0.33	0.02	4.84275e-98	6.44437e-105	0.212102	99.7	99.6	99.6
Dtymk	0.83	0.49	0.33	-0.16	2.32411e-31	6.25174e-13	0.000527576	52.8	54	54
Tafa5	4.88	0.09	0.33	0.24	0.000122415	1.40733e-46	1.9784e-24	96	93.9	93.9
Homer3	0.34	0.17	0.33	0.15	0.00260314	1.22111e-08	0.0150966	27.7	26.6	26.6
Gpx7	0.17	0.34	0.33	-0.01	0.00107683	0.00233781		12.7	15.3	15.3
Grm8	0.33	0.26	0.33	0.07	0.0141906	0.00247518	0.650316	17.9	17	17
Map3k21	0.14	0.36	0.33	-0.03	0.00551015	0.015303		9	13.2	13.2
A430106G13Rik	0.23	0.13	0.33	0.19	0.113848	7.2912e-05	0.0340372	18.3	17.2	17.2
Ankrd29	0.73	0.46	0.33	-0.13	4.34322e-22	1.47308e-10	0.017483	41.4	47.8	47.8
Gab2	1.2	0.27	0.33	0.06	1.5719e-05	3.30015e-07	0.503839	42.4	42	42
Wdfy1	0.33	0.21	0.33	0.12	0.00117207	3.47871e-07	0.107439	24.7	24.8	24.8
Oxnad1	0.48	0.51	0.33	-0.18	3.77626e-18	1.99821e-07	0.00788019	31.9	34.4	34.4
D630045J12Rik	0.19	0.21	0.33	0.12	0.0539555	0.00280403	0.395116	13.4	13.7	13.7
Krt1	0.48	0.11	0.33	0.22	0.0502676	6.1372e-10	7.43758e-05	36.5	34.4	34.4
Gm15478	0.16	0.09	0.33	0.24	0.381258	0.00139712		15	12.1	12.1
Plk4	0.13	0.46	0.33	-0.13	0.00379268	0.0558766		7.6	10.6	10.6
Cln3	0.47	0.15	0.33	0.18	0.00526242	2.59755e-10	0.00109043	36.1	34.9	34.9
Polr2i	1.15	0.18	0.33	0.14	6.06653e-08	2.55678e-22	4.90743e-05	66.7	67	67
Sac3d1	0.15	0.32	0.33	0	0.00213683	0.00289535		11.7	15	15
Nsf	1.29	0.2	0.33	0.12	5.98198e-07	1.95566e-15	0.00660277	61	60.8	60.8
Zyx	0.35	0.43	0.33	-0.1	1.99988e-12	4.27749e-07	0.200388	25.5	28.5	28.5
Btf3	5.32	0.34	0.33	-0.01	3.40988e-76	4.79018e-65	0.69173	98.5	98	98
Cox6c	8.54	0.13	0.33	0.19	2.60201e-16	5.88093e-90	3.88935e-32	99.5	99.1	99.1
Fkbp5	0.33	0.29	0.33	0.04	0.000516588	0.000148017	0.772103	20.8	19.8	19.8
Wdr74	0.3	0.37	0.33	-0.04	5.15146e-11	3.24904e-08	0.621034	23.7	27.4	27.4
Ndel1	1.15	0.35	0.33	-0.03	2.01764e-21	6.2147e-17	0.645492	61.1	63.9	63.9
Ftsj3	0.29	0.31	0.33	0.01	6.93131e-07	7.46621e-07	0.909208	21.8	24.9	24.9
Efemp2	0.88	0.17	0.33	0.16	1.48398e-05	4.45082e-17	0.000145822	56.5	56.6	56.6
Bloc1s2	0.61	0.34	0.33	-0.02	5.20468e-15	2.56073e-12	0.792149	42.9	46.1	46.1
Cox5b	3.88	0.21	0.33	0.12	5.72763e-24	4.32252e-53	1.95642e-07	96.1	95.3	95.3
Fbxo5	0.11	0.49	0.33	-0.16	0.0121591	0.121113		6.2	8.2	8.2
Mdm2	1.08	0.36	0.32	-0.04	2.40766e-20	5.35243e-15	0.491354	60.9	60.7	60.7
Pak1ip1	0.87	0.48	0.32	-0.15	8.13835e-34	1.77715e-14	0.000590562	52.9	58.8	58.8
Srsf7	2.15	0.39	0.32	-0.06	2.50549e-39	1.61183e-25	0.0937076	82.2	83	83
Ryr2	0.13	0.3	0.32	0.03	0.0598581	0.0464771		8.6	10.2	10.2
Lrrc8d	0.65	0.06	0.32	0.27	0.33917	4.91892e-09	3.09753e-06	40	37.8	37.8
Abhd17a	0.89	0.25	0.32	0.07	5.97981e-12	8.96526e-18	0.109943	58.3	59.3	59.3
Mastl	0.11	0.5	0.32	-0.17	0.0230063	0.169113		4.8	7.4	7.4
Nop9	0.22	0.22	0.32	0.1	0.00288998	2.27692e-05	0.295646	18.3	19	19
Elob	7.44	0.22	0.32	0.11	1.46118e-39	2.90606e-83	3.31997e-10	99.2	98.4	98.4
Rpl9	16.92	0.37	0.32	-0.04	1.78905e-128	9.67409e-93	0.0256696	99.7	99.6	99.6
Dohh	0.33	0.27	0.32	0.05	1.47821e-07	1.92331e-09	0.499989	27.7	29.3	29.3
Tmem63a	0.23	0.22	0.32	0.1	0.00233702	1.50742e-05	0.28406	18.4	19.9	19.9
Gns	1.05	0.08	0.32	0.24	0.0365698	7.89247e-18	7.01286e-10	59.7	59.4	59.4
Cdk2ap1	1.03	0.27	0.32	0.06	1.03151e-13	2.25038e-18	0.214904	61.7	62.3	62.3
Wdr34	0.24	0.33	0.32	0	9.70765e-06	2.73823e-05	0.987112	18	21	21
Axl	0.81	0.16	0.32	0.17	0.000394104	1.09252e-13	0.000320352	51.4	49.9	49.9
Prss36	0.21	0.27	0.32	0.06	0.000835051	7.77312e-05	0.612908	16.8	18.7	18.7
Gm11867	0.18	0.49	0.32	-0.16	3.94444e-06	0.00420055	0.23195	10.7	18.3	18.3
Dag1	2.6	0.04	0.32	0.29	0.205586	1.102e-37	3.91036e-29	88.9	85.5	85.5
Hist1h2ab	0.13	0.54	0.32	-0.22	0.0045069	0.117171		7.5	8.1	8.1
Slf1	0.65	0.41	0.32	-0.09	3.97389e-11	9.42342e-07	0.298345	33	36.6	36.6
Diablo	0.72	0.3	0.32	0.02	2.88646e-13	3.77534e-14	0.700876	49.6	52	52
Tspan17	0.15	0.22	0.32	0.1	0.0517879	0.00562098		11.9	13	13
Arhgap39	0.53	0.21	0.32	0.12	0.000773532	1.95802e-07	0.107508	32.6	33	33
Rpf2	0.31	0.36	0.32	-0.04	1.82524e-09	3.18194e-07	0.682181	22.8	27.2	27.2
Tmem219	0.5	0.41	0.32	-0.09	6.46393e-15	1.01837e-08	0.190837	34	36.9	36.9
Rhod	0.54	0.08	0.32	0.24	0.115371	5.50824e-11	2.32372e-06	41.1	37.8	37.8
Drc3	0.2	0.3	0.32	0.03	0.00480564	0.00302419	0.876667	12.8	15.2	15.2
0610010F05Rik	0.5	0.24	0.32	0.08	0.000219225	1.66024e-06	0.353486	29.7	30.6	30.6
Map1lc3b	2.63	0.22	0.32	0.11	4.04353e-19	1.03552e-38	6.55818e-05	90.5	89.8	89.8
Ubxn11	0.15	0.33	0.32	-0.01	0.0101073	0.0177604		9.2	12.5	12.5
Pwwp3a	0.34	0.27	0.32	0.05	2.24567e-06	6.19474e-08	0.544988	26.8	28.2	28.2
Dbn1	0.57	-0.01	0.32	0.33	0.837617	5.70544e-11	2.57919e-11	42.4	37.7	37.7
Sun2	0.34	0.34	0.32	-0.02	2.72929e-09	1.16952e-07	0.821334	25.8	27.9	27.9
Med30	0.65	0.27	0.32	0.05	3.86537e-10	4.84153e-13	0.360772	46.9	47.7	47.7
Hilpda	0.13	0.27	0.32	0.05	0.0294667	0.0115046		10.1	12.4	12.4
Crtap	0.11	0.29	0.32	0.03	0.0395907	0.0280253		8.4	11.5	11.5
Vasn	0.28	0.18	0.32	0.14	0.0036706	3.98947e-07	0.0565006	23.8	22.8	22.8
Prelid1	0.81	0.27	0.32	0.05	9.48041e-12	5.90341e-15	0.345177	53.5	55.5	55.5
Wtip	0.72	0.2	0.32	0.13	8.5708e-06	4.62758e-13	0.0106929	48.1	48.6	48.6
Coq6	0.14	0.29	0.32	0.03	0.00946409	0.00571631		11.1	13.8	13.8
Wdr66	0.12	0.36	0.32	-0.04	0.0401846	0.0809621		6.7	9	9
2310011J03Rik	0.74	0.24	0.32	0.08	3.45549e-09	3.53947e-14	0.12642	49.8	51.6	51.6
Ppt2	0.46	0.17	0.32	0.15	0.00115242	7.6799e-10	0.00810119	35	34.3	34.3
Cpsf1	0.26	0.27	0.32	0.05	2.15438e-05	1.20793e-06	0.598022	21	23.1	23.1
Ifrd1	3.06	0.69	0.32	-0.37	8.63235e-98	1.37835e-19	2.43479e-26	86.6	85.4	85.4
Cby1	0.74	0.59	0.32	-0.27	6.73977e-34	1.97415e-09	2.6019e-07	45.7	47.6	47.6
Irf2bpl	2.6	0.38	0.32	-0.06	7.29306e-42	5.53251e-28	0.115476	87	86.3	86.3
Got1	0.34	0.26	0.32	0.06	1.13431e-05	1.30428e-07	0.44383	26.9	26.7	26.7
BC051226	0.2	0.26	0.32	0.06	0.00121925	0.000136795	0.63404	16.5	18.1	18.1
Bin3	0.38	0.32	0.32	0	1.03051e-07	3.0412e-07	0.98698	26.6	29.4	29.4
Serf2	9.35	0.18	0.32	0.15	2.23816e-32	2.86762e-100	3.08295e-21	99.6	98.9	98.9
0610010K14Rik	0.84	0.24	0.32	0.09	2.35611e-09	1.58193e-15	0.066533	55.4	55.1	55.1
Naa40	0.62	0.27	0.32	0.05	3.13353e-08	4.31949e-10	0.510286	41.5	41.6	41.6
Trerf1	1.99	0.05	0.32	0.27	0.215695	4.45292e-17	5.95334e-12	72.3	66.3	66.3
Nup37	0.27	0.46	0.32	-0.14	3.65855e-10	3.65403e-05	0.138579	18.9	22.8	22.8
Tmem216	0.31	0.3	0.32	0.02	1.56083e-07	6.19474e-08	0.817602	24.3	26.3	26.3
Pdcl3	0.77	0.38	0.32	-0.06	3.5297e-22	1.30443e-14	0.257622	51.6	55.8	55.8
Nhp2	0.41	0.3	0.32	0.02	4.21461e-09	2.02352e-09	0.822391	31.8	34.1	34.1
Mtap	0.39	0.17	0.32	0.15	0.00272041	2.77039e-08	0.0213159	30.9	29.5	29.5
Rhbdf2	0.16	0.22	0.32	0.1	0.0423586	0.00374596		12.8	13.6	13.6
Calm2	6.52	0.4	0.32	-0.08	4.77379e-83	2.0329e-47	0.000357902	98.9	98.5	98.5
Ptprk	0.2	0.34	0.32	-0.03	0.00894256	0.0210561	0.910937	11.4	12.3	12.3
Commd2	0.53	0.25	0.32	0.07	5.23234e-08	1.36071e-11	0.232204	41.2	42.2	42.2
Eftud2	0.86	0.33	0.32	-0.01	1.36549e-14	7.41386e-13	0.925125	50.7	53.6	53.6
Ap2a2	1.17	0.1	0.32	0.22	0.00890847	3.91652e-19	2.1989e-09	65.4	62.8	62.8
Vax2os	0.96	0.18	0.32	0.14	0.00119165	4.39869e-09	0.0188002	46.7	44.4	44.4
Peak1	2.47	0.07	0.32	0.25	0.0447156	2.52531e-24	4.28571e-15	81.5	78.8	78.8
Ubald1	0.35	0.36	0.32	-0.04	9.4752e-11	4.85558e-08	0.63395	27.5	29.6	29.6
Ssbp4	1.06	0.2	0.32	0.12	1.16455e-08	4.99246e-20	0.00120595	64.2	64.4	64.4
B9d2	0.37	0.4	0.32	-0.09	1.44896e-15	3.28317e-09	0.188893	28.6	33.5	33.5
Gulo	0.13	0.35	0.32	-0.03	0.0158747	0.0389723		7.7	11.6	11.6
Rer1	1.37	0.28	0.32	0.04	1.89387e-20	9.09839e-25	0.296587	72	74.7	74.7
Gltp	0.38	0.32	0.32	0	7.05924e-10	3.15634e-09	0.987112	30.3	32.3	32.3
D8Ertd738e	2.36	0.36	0.32	-0.05	4.28426e-49	5.39963e-34	0.136652	87	88.4	88.4
Saxo2	0.13	0.26	0.32	0.06	0.0554175	0.0224643		9.7	11.1	11.1
Tnip1	0.35	0.16	0.32	0.16	0.00598265	6.69151e-08	0.0168949	28	27.1	27.1
Syn3	1.58	0.19	0.32	0.12	1.1416e-06	4.31494e-15	0.00613147	68.7	65.4	65.4
Dhx58	0.15	0.47	0.32	-0.15	9.40306e-05	0.0137248		9.6	14.5	14.5
Ppp4c	0.69	0.34	0.32	-0.03	2.8837e-16	8.65443e-13	0.685118	46.4	50.1	50.1
Zbtb8a	0.2	0.31	0.32	0	0.000986489	0.00139066	0.983154	14	16.5	16.5
Gm47819	0.13	0.35	0.32	-0.04	0.0124403	0.0332358		8.1	11.9	11.9
Pdp1	0.11	0.24	0.32	0.07	0.101935	0.0381321		8.6	10.4	10.4
Txndc5	0.33	0.22	0.32	0.1	9.78789e-05	3.06227e-08	0.153282	26.9	27.3	27.3
Cchcr1	0.31	0.41	0.32	-0.09	1.00162e-10	2.39652e-06	0.271441	23.8	25.4	25.4
Anxa5	4.49	0.17	0.32	0.15	9.10673e-16	6.04634e-51	7.48047e-12	96.9	95.5	95.5
Ift74	1.03	0.31	0.32	0.01	4.68084e-13	7.46288e-13	0.884418	55.5	55.4	55.4
Cbx8	0.13	0.29	0.32	0.02	0.0149364	0.0119836		10.1	13.2	13.2
mt-Co2	97.2	0.01	0.32	0.31	0.635858	1.70539e-206	1.07615e-199	100	100	100
Shc1	0.41	0.23	0.32	0.09	1.62527e-05	5.02613e-09	0.177285	32.9	32.4	32.4
Rps17	9	0.33	0.32	-0.01	1.64951e-90	9.00176e-77	0.622789	99.1	99.1	99.1
Map3k14	1.32	0.33	0.32	-0.01	2.14253e-16	4.84288e-14	0.858338	62	63.1	63.1
Anxa7	0.7	0.24	0.32	0.07	2.43319e-08	1.81567e-12	0.184633	47.9	48.3	48.3
Lamb2	0.75	0.04	0.32	0.27	0.365023	1.73331e-14	8.409e-11	52.4	48.6	48.6
Fermt2	2.59	0.26	0.32	0.05	2.65337e-24	9.41427e-32	0.115592	88.1	87.7	87.7
Mex3a	0.11	0.23	0.32	0.09	0.140914	0.0451092		8.8	9.6	9.6
Cdh18	0.16	0.4	0.32	-0.08	0.00010818	0.00387127		11.2	16.8	16.8
Cdk8	6.6	0.51	0.32	-0.2	2.05616e-168	5.90964e-57	4.04502e-24	98.7	99.3	99.3
Taok3	1.15	0.18	0.31	0.14	3.99935e-05	2.39743e-13	0.00323742	57.9	56.7	56.7
Thop1	0.19	0.36	0.31	-0.05	2.36883e-05	0.000466564	0.733218	14.6	18.5	18.5
Topbp1	0.42	0.55	0.31	-0.23	1.04608e-17	5.46894e-06	0.00130647	29	28.8	28.8
Sdsl	0.54	0.07	0.31	0.25	0.178349	3.93467e-11	5.39712e-07	41.7	38.6	38.6
Epb41	3.64	0.06	0.31	0.26	0.0452321	1.47439e-31	7.78236e-21	92	88.8	88.8
Chmp1a	0.54	0.18	0.31	0.13	0.000101026	3.163e-11	0.0117615	41	40.7	40.7
Gm7694	0.28	0.13	0.31	0.18	0.0397554	9.81979e-07	0.0102639	24.2	22.5	22.5
Ppil1	0.31	0.35	0.31	-0.03	2.90712e-10	6.97791e-08	0.685118	25.4	27.6	27.6
Dgke	0.34	0.13	0.31	0.18	0.0577416	2.97292e-06	0.0121924	25.6	23.2	23.2
Uqcrc1	1.59	0.33	0.31	-0.02	8.54684e-32	3.65017e-26	0.700011	76.7	78.8	78.8
Dus4l	0.22	0.36	0.31	-0.04	2.45818e-05	0.000408729	0.75671	15.2	19.4	19.4
Fkbp8	1.91	0.24	0.31	0.08	9.88191e-20	2.01149e-31	0.0119199	83.5	83.2	83.2
Igsf10	0.15	0.29	0.31	0.02	0.0127661	0.0106236		10.9	13.3	13.3
Gnb5	1.1	0.11	0.31	0.2	0.00446904	2.89301e-16	5.49045e-07	62.9	59.9	59.9
Naglu	0.17	0.26	0.31	0.06	0.00691356	0.00129408		14.2	15.9	15.9
Tsn	2.98	0.17	0.31	0.15	7.67697e-14	1.4265e-43	5.40304e-10	92.7	91.6	91.6
Lsm4	1.32	0.34	0.31	-0.03	1.80267e-23	1.94961e-18	0.614346	68.6	69.7	69.7
Trp53	0.63	0.35	0.31	-0.03	2.00662e-12	1.53703e-09	0.670972	40.6	43.1	43.1
Naaa	0.21	0.54	0.31	-0.23	2.48742e-12	0.000173365	0.0109341	14.4	23.4	23.4
Sesn2	0.17	0.39	0.31	-0.08	0.00027724	0.00614323		11.6	15.7	15.7
Apba3	0.18	0.23	0.31	0.08	0.0074507	0.000464347	0.509336	15.6	16.7	16.7
Eif3h	2.8	0.31	0.31	0	4.94588e-42	2.14884e-38	0.992316	90.4	90.9	90.9
Oas1c	0.13	0.35	0.31	-0.04	0.00749275	0.0245875		8.9	13	13
Kank3	0.12	0.22	0.31	0.1	0.0974461	0.0188263		10.6	10.7	10.7
Prkcsh	0.86	0.21	0.31	0.11	1.20621e-07	2.39245e-15	0.0154953	55.3	55.4	55.4
Ptma	22.53	0.24	0.31	0.07	1.72819e-60	1.40765e-91	3.08827e-05	99.8	99.7	99.7
Dyrk2	0.42	0.21	0.31	0.1	0.000140314	2.2926e-08	0.117265	32	31.8	31.8
Sec22c	0.19	0.23	0.31	0.08	0.0157866	0.00124498	0.519276	14.8	15.8	15.8
Snx3	3.51	0.29	0.31	0.02	1.37467e-43	3.20238e-47	0.394019	94.6	94.8	94.8
Ninj1	0.87	0.05	0.31	0.26	0.225256	1.45351e-15	1.06858e-10	56.9	53.1	53.1
Ergic3	2.4	0.19	0.31	0.12	7.39237e-16	1.08092e-39	6.04245e-07	88.6	87.5	87.5
Rps6ka1	0.26	0.26	0.31	0.05	0.000295604	2.10283e-05	0.594482	20.6	21.5	21.5
Bub3	0.92	0.35	0.31	-0.03	2.95288e-17	5.42793e-13	0.574374	57.7	56.6	56.6
Exosc8	0.38	0.39	0.31	-0.08	6.25112e-14	1.94951e-08	0.243061	29.6	32.6	32.6
Ankrd49	0.34	0.27	0.31	0.04	2.79809e-06	1.98896e-07	0.636174	26.4	27.9	27.9
Napa	0.89	0.33	0.31	-0.02	5.36575e-19	3.5593e-15	0.698488	55.9	59.1	59.1
Cblb	0.78	-0.04	0.31	0.35	0.536861	4.69825e-09	1.5675e-10	45.2	39.3	39.3
Nolc1	0.47	0.42	0.31	-0.11	4.39272e-16	1.72632e-08	0.0895177	33.3	36.7	36.7
Slc25a13	0.18	0.18	0.31	0.13	0.170396	0.0163137	0.407958	11.7	11.4	11.4
Rpl36al	3.09	0.32	0.31	-0.01	2.70086e-42	2.73113e-36	0.794761	92.6	92.5	92.5
Gm34552	0.15	0.33	0.31	-0.02	0.00577343	0.0135503		10.3	13.7	13.7
Schip1	1.19	0.13	0.31	0.18	0.00166064	3.68131e-14	3.81845e-05	61.8	59.8	59.8
Selenbp1	0.7	0.24	0.31	0.07	3.41575e-08	8.88701e-12	0.240729	45.5	49.1	49.1
Fam185a	0.25	0.31	0.31	0	0.00171049	0.00228211	0.97978	15.1	17	17
Rbbp8	0.34	0.65	0.31	-0.34	1.03784e-13	0.00128825	0.000474239	17.2	22.3	22.3
Ccdc39	0.26	0.55	0.31	-0.24	2.74155e-12	0.00027481	0.00815912	16.6	22.1	22.1
Adamts10	0.43	0.27	0.31	0.04	4.53605e-06	6.42406e-07	0.702092	29.6	30.2	30.2
Gcsh	1.07	0.27	0.31	0.04	4.27478e-13	5.49111e-16	0.404177	62.4	61.3	61.3
Thoc5	0.35	0.3	0.31	0.01	4.84948e-07	4.88524e-07	0.901712	25.9	27.9	27.9
Clcn2	0.17	0.3	0.31	0.01	0.00149341	0.00170694		13.8	16.3	16.3
Hbegf	0.53	0.37	0.31	-0.06	4.07665e-07	5.87382e-05	0.583912	29.5	29	29
Bex4	0.68	0.16	0.31	0.15	0.000751687	4.79802e-11	0.0033543	46.2	44.2	44.2
Sys1	1.28	0.22	0.31	0.09	2.66068e-12	8.30711e-22	0.0140161	70.9	71.2	71.2
Prorp	0.28	0.2	0.31	0.11	0.0361976	0.00122521	0.357071	17	17.5	17.5
Lgalsl	1.17	0.15	0.31	0.16	0.000180723	2.07379e-15	9.82218e-05	65.2	62	62
Josd1	0.31	0.32	0.31	-0.01	9.16658e-08	6.92487e-07	0.938188	23.5	26.8	26.8
Txn1	2.86	0.27	0.31	0.04	4.81647e-30	3.08788e-35	0.268264	91.7	91	91
Gnptg	0.55	0.21	0.31	0.1	8.04266e-06	1.96065e-10	0.0876273	40	40.7	40.7
Cenps	0.1	0.45	0.31	-0.14	0.0103951	0.102526		5.9	10.5	10.5
Nxt1	0.39	0.53	0.31	-0.22	9.16531e-23	1.24782e-07	0.000249128	29.5	33.9	33.9
Tradd	0.18	0.27	0.31	0.04	0.00133849	0.000415008	0.778491	15.5	18.1	18.1
Sostdc1	0.54	0.19	0.31	0.12	0.000821707	1.19707e-07	0.0865922	35.9	34.8	34.8
Enkd1	0.1	0.36	0.31	-0.06	0.0188278	0.0614698		6.8	11.2	11.2
Rpl13	22.02	0.39	0.31	-0.08	8.51917e-148	4.40352e-85	1.3451e-06	99.8	99.6	99.6
Mzt2	0.43	0.35	0.31	-0.04	4.92936e-12	8.96131e-09	0.575954	32.1	35	35
Zfp511	0.27	0.34	0.31	-0.03	3.46413e-08	2.36889e-06	0.728249	21	25.3	25.3
Ntn4	2.94	-0.01	0.31	0.32	0.752305	1.78492e-25	2.54823e-26	86.4	82.4	82.4
Rlim	1.01	0.27	0.31	0.04	7.45082e-12	8.29663e-14	0.534708	57.5	59	59
Nfe2l2	1.32	0.19	0.31	0.12	9.86931e-08	3.79912e-17	0.00423292	67.6	66.6	66.6
Edc4	0.29	0.24	0.31	0.07	9.9272e-05	8.44605e-07	0.383477	24.1	24.6	24.6
Gm4285	0.22	0.41	0.31	-0.1	1.70246e-06	0.000656015	0.395966	15.2	19.2	19.2
Dolk	0.3	0.26	0.31	0.04	2.11915e-06	1.00644e-07	0.597779	24.5	26.8	26.8
Abcb10	0.16	0.16	0.31	0.15	0.142192	0.00508915		13.6	13	13
Dgkz	0.83	0.17	0.31	0.14	4.59141e-05	4.89889e-14	0.00142601	53.9	53	53
1600010M07Rik	0.62	0.37	0.31	-0.06	9.98908e-13	1.86192e-08	0.403296	39.7	40.8	40.8
Fam151b	0.2	0.23	0.31	0.08	0.0122155	0.000938777	0.524184	15.5	16.3	16.3
Fzd1	0.14	0.26	0.31	0.04	0.0236986	0.0109507		11.2	13	13
Mrpl35	0.53	0.32	0.31	-0.01	2.46928e-12	1.43103e-10	0.886346	39.9	42.8	42.8
Med28	1.89	0.28	0.31	0.03	1.20483e-27	8.03104e-31	0.424777	83.1	84.3	84.3
Atp5j2	5.43	0.16	0.31	0.15	5.82878e-20	2.01231e-71	6.07728e-18	98.7	97.7	97.7
Pola2	0.13	0.34	0.31	-0.03	0.0167787	0.0409431		9.2	11.2	11.2
Lmf1	0.43	0.24	0.31	0.07	4.98932e-06	1.44248e-08	0.334144	32.4	33.8	33.8
Ankrd42	0.15	0.34	0.31	-0.03	0.011658	0.0289654		9.3	12.9	12.9
Usp21	0.25	0.25	0.31	0.05	0.000142345	8.35442e-06	0.581872	21.2	22.2	22.2
Ubl4a	0.32	0.44	0.31	-0.14	1.22573e-14	7.03315e-07	0.045491	24.7	28.1	28.1
1190007I07Rik	0.41	0.3	0.31	0.01	2.1515e-09	5.31187e-09	0.948061	32	34.8	34.8
Adck5	0.28	0.2	0.31	0.1	0.000726158	6.25225e-07	0.168713	24	23.9	23.9
Mcrs1	0.76	0.34	0.31	-0.04	1.61245e-17	6.32242e-13	0.536584	49.5	54.6	54.6
Incenp	0.21	0.65	0.31	-0.34	8.1866e-09	0.0131502	0.00783326	14.1	14.5	14.5
1700120C14Rik	0.16	0.38	0.31	-0.08	0.00167686	0.0181966		10.2	14.3	14.3
Prrg2	0.17	0.24	0.31	0.07	0.0223775	0.00396444		13.1	14.4	14.4
Gm48623	0.14	0.26	0.3	0.05	0.0544657	0.0282115		9.7	11.7	11.7
9630013D21Rik	0.08	0.51	0.3	-0.2	0.0375032	0.244232		2.4	9.2	9.2
Wnt9a	0.13	0.41	0.3	-0.11	0.00878401	0.0710104		6.8	11.1	11.1
Dnase1l1	0.19	0.22	0.3	0.09	0.0221772	0.00170728	0.501167	14.7	15.4	15.4
Taco1os	0.21	0.35	0.3	-0.05	3.60613e-05	0.00079399	0.702077	15.3	18.7	18.7
Jmjd8	0.3	0.16	0.3	0.14	0.00498868	2.28513e-07	0.0353531	25.3	25.1	25.1
Galt	0.31	0.14	0.3	0.16	0.0129477	8.5601e-08	0.00931184	27	25.8	25.8
Epha2	0.24	0.4	0.3	-0.1	2.92254e-07	0.000251783	0.362094	17.2	21.2	21.2
Atp9a	1.2	-0.02	0.3	0.32	0.626351	6.52895e-18	3.6949e-19	66.6	61	61
Vmp1	1.62	0.3	0.3	0	6.67017e-20	3.33987e-18	0.988935	73.3	74.6	74.6
Serhl	0.31	0.27	0.3	0.03	3.13377e-06	4.59257e-07	0.711616	25	26.8	26.8
Thoc6	0.23	0.5	0.3	-0.19	5.99751e-11	0.000208978	0.0313662	16.4	22.5	22.5
Comt	2.7	0.31	0.3	-0.01	1.58121e-33	1.0091e-29	0.907136	88.5	89.8	89.8
Rpl28	15.14	0.27	0.3	0.03	2.19288e-75	3.21277e-87	0.0731057	99.7	99.5	99.5
Cirbp	2.89	0.04	0.3	0.26	0.103076	8.79398e-40	5.0973e-29	92.6	88.7	88.7
Naaladl2	6.29	-0.04	0.3	0.34	0.357478	2.10669e-13	1.23722e-16	81.4	75.7	75.7
Ndufv1	1.02	0.34	0.3	-0.03	1.214e-21	5.1797e-16	0.494584	60.6	63.8	63.8
Sept11	0.97	-0.1	0.3	0.4	0.0275726	3.35293e-13	3.86528e-21	58.5	49.2	49.2
Jund	17.79	0.31	0.3	-0.01	3.84724e-61	2.66292e-52	0.718153	99.7	98.9	98.9
Pes1	0.3	0.22	0.3	0.08	0.000159785	4.91871e-07	0.288318	25.2	25.4	25.4
Heatr1	0.19	0.26	0.3	0.04	0.00493975	0.00162111	0.775215	14.5	16.7	16.7
Nat9	0.29	0.22	0.3	0.09	0.000182673	3.69514e-07	0.253586	24.3	25	25
Lhfpl3	0.4	0.34	0.3	-0.04	0.00143706	0.00772146	0.819756	17.2	15.2	15.2
Rnaseh2a	0.23	0.36	0.3	-0.06	3.26402e-06	0.000250404	0.597779	17.3	20.2	20.2
Fam89b	0.25	0.22	0.3	0.08	0.00074402	4.63271e-06	0.310765	21.6	22.5	22.5
Smn1	0.51	0.33	0.3	-0.02	1.21247e-11	2.97179e-09	0.749323	36.6	39.6	39.6
E230016M11Rik	0.38	0.2	0.3	0.1	0.00918351	0.000141615	0.323971	21.6	22.9	22.9
Msl3	0.56	0.28	0.3	0.02	6.18488e-09	2.31674e-09	0.79875	39.5	40.7	40.7
Rabl2	0.16	0.29	0.3	0.02	0.00517172	0.00461248		12.7	15.3	15.3
Dcakd	0.67	0.19	0.3	0.11	4.51306e-05	8.35294e-11	0.0293751	44.8	46.3	46.3
Hcn2	0.18	0.29	0.3	0.01	0.00527328	0.00549536		12.8	15.3	15.3
Rit2	0.18	0.26	0.3	0.04	0.0372582	0.0207076		11.3	13.7	13.7
Gpn3	0.31	0.35	0.3	-0.05	2.31789e-09	9.75447e-07	0.584584	24.1	26.7	26.7
Tomm5	1.04	0.26	0.3	0.04	7.6716e-15	1.40448e-17	0.434013	63	66.3	66.3
Wdr31	0.12	0.31	0.3	0	0.0389601	0.052735		8.1	10.8	10.8
Ginm1	0.84	0.17	0.3	0.13	7.82573e-06	6.30043e-15	0.00212995	56.5	56.5	56.5
Rps15	14.32	0.33	0.3	-0.03	2.36505e-107	1.68444e-80	0.0984711	99.6	99.5	99.5
Aqp5	0.66	0.18	0.3	0.13	0.00091159	1.35989e-08	0.0355422	42.2	40.9	40.9
Slc12a5	0.27	0.24	0.3	0.06	0.000300967	1.33293e-05	0.538199	21	22.5	22.5
Tbcc	0.47	0.31	0.3	-0.01	1.25458e-10	1.79528e-09	0.954583	36	38.8	38.8
Cd24a	0.4	0.39	0.3	-0.09	2.65644e-09	1.87654e-05	0.295106	26.8	27.9	27.9
Cadps2	2.22	-0.08	0.3	0.38	0.103183	4.65807e-11	1.78927e-16	62.7	60.1	60.1
Pcnt	0.52	0.25	0.3	0.05	6.06403e-06	1.8374e-07	0.539601	35.4	34.6	34.6
Pbdc1	1.74	0.45	0.3	-0.15	8.66557e-49	8.59763e-20	8.60976e-06	75.6	78	78
Nsmce3	0.43	0.33	0.3	-0.03	5.73039e-12	1.95088e-09	0.728287	33.6	37.6	37.6
Rundc3a	0.18	0.18	0.3	0.12	0.0575911	0.00151209		15.4	14.9	14.9
Cox6b1	5.35	0.15	0.3	0.15	1.0894e-17	1.72249e-65	4.22066e-17	98.6	97.9	97.9
Ss18l2	0.7	0.18	0.3	0.12	1.63295e-05	2.59225e-12	0.0140623	49.6	49.1	49.1
Timm10	0.36	0.29	0.3	0.01	3.79663e-08	3.83156e-08	0.89222	28.7	30.7	30.7
Hsd3b7	0.24	0.22	0.3	0.08	0.00171756	2.51424e-05	0.37157	20.1	20.8	20.8
Peli3	0.13	0.26	0.3	0.04	0.0460786	0.0281441		10	11.8	11.8
Map6	0.17	0.25	0.3	0.05	0.0220382	0.00730477		12.8	14.3	14.3
Mtx1	0.86	0.27	0.3	0.03	6.25409e-09	9.01446e-10	0.721999	49.9	50.9	50.9
Mok	0.78	0.37	0.3	-0.07	2.16657e-15	2.2403e-09	0.231979	45.2	47.8	47.8
Ccdc162	0.22	0.39	0.3	-0.09	0.00109282	0.0187752	0.597745	11.7	15	15
Zc3hc1	0.24	0.31	0.3	-0.01	5.9235e-06	2.76117e-05	0.940732	19.5	22.3	22.3
2700062C07Rik	0.32	0.25	0.3	0.05	1.24592e-05	2.50596e-07	0.498371	26.1	27	27
Spcs1	2.23	0.14	0.3	0.16	7.97223e-09	1.03692e-33	1.12548e-09	88.3	87	87
Gm8797	0.2	0.34	0.3	-0.04	9.86149e-06	0.000261397	0.714738	16.2	20.1	20.1
Acd	0.23	0.29	0.3	0.01	3.67182e-05	3.19e-05	0.904865	19.1	21.7	21.7
Myo18a	1.36	0.13	0.3	0.17	0.000401936	1.47019e-17	2.79764e-06	67.8	66.4	66.4
Mrpl23	1.54	0.22	0.3	0.08	2.6545e-14	2.97722e-23	0.0274709	75.8	76	76
Pdcd2	0.26	0.34	0.3	-0.04	1.16209e-08	2.41885e-06	0.624248	21.1	25.1	25.1
Slc4a4	0.21	0.15	0.3	0.15	0.17592	0.00552667	0.236747	14.8	14.2	14.2
Tprkb	1.47	0.12	0.3	0.18	0.00159087	2.73121e-16	2.41034e-06	74.2	69.7	69.7
Gatd1	0.42	0.21	0.3	0.09	5.06759e-05	1.30262e-08	0.151996	32.4	33.7	33.7
Mta2	0.42	0.23	0.3	0.07	5.23723e-06	7.94273e-09	0.287706	33.5	33.8	33.8
Sbf2	3.37	0.08	0.3	0.22	0.0056318	4.24314e-29	5.05998e-16	90.8	86.9	86.9
B4galt1	0.5	0.09	0.3	0.21	0.141074	9.02495e-07	0.00148786	32.6	30.5	30.5
Rangap1	0.61	0.69	0.3	-0.39	4.43941e-34	1.84454e-06	1.19259e-10	38.5	39.7	39.7
Il17ra	0.14	0.26	0.3	0.04	0.0357559	0.0184526		11	12.3	12.3
Rpl7	16.26	0.19	0.3	0.11	7.76149e-36	4.61912e-84	1.88827e-12	99.7	99.2	99.2
Pfn1	2.38	0.21	0.3	0.09	3.91605e-15	1.97958e-27	0.0040813	87.7	85.4	85.4
Pcp4	0.25	0.26	0.3	0.04	0.000391703	9.33665e-05	0.748265	19.6	21.2	21.2
Dync1i2	2.63	0.21	0.3	0.09	4.7888e-16	1.63921e-30	0.00115681	87.9	87.3	87.3
Acvr2b	0.3	0.12	0.3	0.18	0.0748712	2.27728e-06	0.00748086	24.9	23.3	23.3
Csrp1	1.67	0.32	0.3	-0.02	6.18906e-18	2.43057e-14	0.694046	70.5	68.6	68.6
Iqck	0.31	0.23	0.3	0.06	0.00432646	0.000389345	0.576138	19.1	21.1	21.1
Gm17231	0.18	0.23	0.3	0.07	0.0484884	0.0137847		11.6	13.1	13.1
Prr7	0.11	0.31	0.3	-0.01	0.0422552	0.0613526		7.9	10.9	10.9
Hscb	0.35	0.25	0.3	0.05	1.83441e-05	6.9887e-07	0.557887	26.4	28.4	28.4
Arl5c	0.39	0.18	0.3	0.12	0.00161115	1.47668e-07	0.0634486	30.8	29.6	29.6
Ndufb8	2.4	0.15	0.3	0.14	8.65591e-11	1.85912e-35	9.74265e-09	90.3	89.4	89.4
Psen2	0.79	0.19	0.3	0.11	8.15489e-06	3.54207e-12	0.0238928	51.6	50.8	50.8
Tshz3	1.5	-0.33	0.3	0.63	1.94747e-11	2.6844e-09	4.92875e-36	58.9	48.8	48.8
Paics	1.34	0.34	0.3	-0.04	6.21851e-25	5.10224e-18	0.398773	70.4	71.3	71.3
Qpctl	0.12	0.27	0.3	0.03	0.0505101	0.0391926		9.2	11.2	11.2
Shisa5	0.61	0.2	0.3	0.1	5.24374e-05	1.78813e-09	0.079574	43.3	41.9	41.9
Cfap410	0.19	0.24	0.3	0.05	0.0053987	0.000925059	0.667783	16.2	16.8	16.8
Snhg17	0.12	0.26	0.3	0.03	0.0420457	0.0268698		10.1	11.9	11.9
Wdr78	0.44	0.46	0.3	-0.16	6.9216e-12	3.40452e-05	0.0456467	25.6	28.5	28.5
Shroom2	0.26	0.25	0.3	0.05	0.00560689	0.00120692	0.704089	17.3	18.1	18.1
Repin1	0.28	0.3	0.3	-0.01	3.85406e-07	2.07365e-06	0.955007	22.9	25.6	25.6
Efcab12	0.18	0.23	0.3	0.06	0.0141608	0.00235721		15.4	15.4	15.4
Zbtb12	0.18	0.26	0.3	0.04	0.00197436	0.000676951	0.791497	15.8	18	18
Gm26885	0.22	0.38	0.3	-0.09	0.000118495	0.00493501	0.548881	13.7	17.3	17.3
Wdr46	0.14	0.28	0.3	0.02	0.0197388	0.0168629		10.7	13.1	13.1
Ndufa10	1.35	0.23	0.3	0.06	4.1461e-13	3.04384e-19	0.106973	70.6	71.6	71.6
Cxcl14	0.55	0.62	0.3	-0.32	1.21754e-29	9.6677e-07	4.40963e-08	32.3	40.1	40.1
Sphkap	0.18	0.39	0.3	-0.09	3.10376e-05	0.00280914	0.481587	13.3	18.3	18.3
Bscl2	0.76	0.12	0.3	0.18	0.00606209	1.24443e-12	5.13438e-05	52.7	50	50
Marveld1	0.14	0.19	0.3	0.11	0.10624	0.0115582		12.4	12.2	12.2
Hsbp1	3.66	0.25	0.3	0.04	9.55542e-36	2.11095e-44	0.104959	95.4	95	95
Adsl	0.35	0.29	0.3	0.01	2.31132e-07	3.05411e-07	0.922899	27.5	29.2	29.2
Pycard	0.19	0.27	0.3	0.02	0.00153575	0.00101531	0.883012	16	17.3	17.3
Ndufb2	2.3	0.15	0.3	0.15	8.9526e-10	6.26069e-34	6.92405e-09	87.8	86.1	86.1
Mrps28	1.22	0.26	0.3	0.04	9.92811e-11	9.7975e-13	0.521829	59.6	62.1	62.1
Hist2h2aa1	0.42	0.22	0.3	0.07	0.000177913	1.23409e-06	0.350965	30.5	29.2	29.2
Ptbp3	1	0.25	0.3	0.04	8.37831e-09	7.36918e-11	0.491602	52.7	55	55
Nfkb2	0.16	0.33	0.3	-0.03	0.00220831	0.00879117		12.5	14.5	14.5
Ankrd44	0.41	0.3	0.3	0	0.000188415	0.000390424	0.992576	22.6	24.3	24.3
Cpox	0.18	0.25	0.3	0.04	0.00820087	0.00265493		14.3	16.2	16.2
Kifc5b	0.11	0.49	0.3	-0.2	0.0135604	0.172805		5.9	8.5	8.5
Eri1	0.28	0.43	0.3	-0.13	3.283e-09	0.000121657	0.15119	20.2	22.7	22.7
Glt8d1	1.28	0.14	0.3	0.15	1.0945e-05	1.60197e-19	1.32497e-05	70.5	69.2	69.2
Emc10	1.59	0.23	0.3	0.07	2.24559e-15	5.5119e-24	0.0377608	78.1	77	77
Sar1a	1.01	0.23	0.3	0.06	7.3363e-11	1.86686e-15	0.186531	61.3	62.2	62.2
9230114K14Rik	0.37	0.42	0.29	-0.13	1.61176e-09	8.22328e-05	0.14901	23.1	26.4	26.4
Npff	0.14	0.18	0.29	0.11	0.127271	0.0145894		12.1	11.8	11.8
Ppp5c	0.44	0.34	0.29	-0.05	1.84155e-12	1.34426e-08	0.471985	33.4	36.5	36.5
Fbxl15	0.34	0.24	0.29	0.05	1.41135e-05	3.10731e-07	0.505098	26.9	28.5	28.5
Rfx1	0.16	0.28	0.29	0.01	0.00858951	0.00821386		12.6	14.7	14.7
Ccdc51	0.23	0.23	0.29	0.06	0.00257821	0.000226628	0.584929	18.3	19.4	19.4
Magoh	1.07	0.33	0.29	-0.04	2.09943e-22	5.60745e-16	0.402631	64.4	66.9	66.9
Ankrd13a	0.32	0.28	0.29	0.02	5.6978e-06	4.08078e-06	0.877204	24.1	26.5	26.5
Hspa1b	0.32	0.52	0.29	-0.22	1.70778e-05	0.024146	0.133624	13.3	15.6	15.6
Nr2c2ap	0.27	0.26	0.29	0.04	4.23815e-05	6.78743e-06	0.711214	22.5	23.4	23.4
Rabepk	0.41	0.36	0.29	-0.06	3.51241e-11	2.30668e-07	0.412833	29.9	33	33
Ptpn1	1.05	0.12	0.29	0.18	0.00381347	3.65902e-14	1.30885e-05	61.5	59.4	59.4
Fastkd2	0.14	0.29	0.29	0.01	0.015371	0.0180148		10.7	13.6	13.6
Exosc2	0.18	0.27	0.29	0.03	0.0030252	0.0017697	0.865799	14.8	17.1	17.1
Uhrf1bp1l	0.64	0.02	0.29	0.27	0.700585	3.0591e-08	6.53259e-07	41.6	37.3	37.3
Ndc1	0.29	0.27	0.29	0.03	0.000183863	7.27886e-05	0.819314	21.9	22	22
Bcl7c	1.01	0.17	0.29	0.13	1.65281e-05	2.32811e-14	0.00227535	60.4	58.7	58.7
Idh3b	1.34	0.27	0.29	0.02	4.08852e-19	3.14918e-20	0.662175	71.2	73.4	73.4
Gm6938	0.26	-0.05	0.29	0.34	0.549526	0.000421787	4.51986e-05	21.8	14.9	14.9
Tomm40	0.82	0.31	0.29	-0.02	1.4592e-14	8.39132e-12	0.765088	52.5	54.1	54.1
Mapkapk3	0.14	0.33	0.29	-0.04	0.0166598	0.0428752		9	12.1	12.1
Mafk	0.33	0.49	0.29	-0.19	5.83091e-14	2.67028e-05	0.0102066	21.9	28.1	28.1
Eef1e1	0.27	0.3	0.29	-0.01	7.19943e-07	4.19294e-06	0.94222	22.4	24.2	24.2
Enox1	0.43	-0.07	0.29	0.36	0.444647	0.00107542	6.43313e-05	23	19.7	19.7
Iscu	1.22	0.23	0.29	0.06	9.47721e-13	2.00149e-18	0.128655	67.9	69.6	69.6
Serinc5	0.68	0.01	0.29	0.28	0.823077	3.36189e-09	3.50561e-08	45.5	41.1	41.1
M6pr	0.72	0.2	0.29	0.09	1.95399e-06	1.39939e-11	0.0719041	49.8	49.7	49.7
Bdh1	0.18	0.33	0.29	-0.03	0.000954656	0.00470212		13.2	16.5	16.5
Ppia	14.44	0.32	0.29	-0.03	8.52738e-73	3.00291e-56	0.272196	99.6	99.4	99.4
Pard6b	0.19	0.23	0.29	0.07	0.015898	0.0023115	0.615471	15.3	15.8	15.8
Vars	0.28	0.34	0.29	-0.04	8.61137e-08	1.06944e-05	0.638541	22.7	24.5	24.5
Hnrnpab	1.09	0.34	0.29	-0.05	1.37369e-18	6.39257e-13	0.390904	62.4	61.6	61.6
5430416N02Rik	0.15	0.27	0.29	0.02	0.0147688	0.0116099		11.9	13.9	13.9
Yipf3	0.96	0.13	0.29	0.16	0.000300286	4.62214e-16	2.64191e-05	61.4	61	61
Gm16201	0.24	0.18	0.29	0.11	0.0304304	0.000676248	0.313197	18.5	17.2	17.2
Sntg2	0.26	0.31	0.29	-0.01	0.00380545	0.00853542	0.940398	13.7	15.4	15.4
Rps6	7.16	0.43	0.29	-0.13	9.36582e-110	4.02753e-47	1.181e-10	98.3	98.2	98.2
Vim	14.98	0.49	0.29	-0.2	7.71744e-131	1.81946e-42	1.74439e-20	99.6	99.4	99.4
Sertad3	0.26	0.22	0.29	0.07	0.00220884	8.22055e-05	0.474739	21	21	21
H3f3a	17.94	0.22	0.29	0.07	2.28849e-64	2.28492e-104	4.35449e-07	99.9	99.9	99.9
Dph3	1.08	0.36	0.29	-0.07	1.33973e-24	1.42795e-14	0.100762	61.4	65.4	65.4
Gm16006	0.17	0.39	0.29	-0.1	0.000160839	0.00836004		11.8	16.5	16.5
Rrp36	0.42	0.36	0.29	-0.07	2.23419e-12	1.11167e-07	0.304752	30.8	34.3	34.3
Qtrt1	0.28	0.25	0.29	0.04	0.000238496	3.20159e-05	0.675826	21	23	23
Utp4	0.23	0.35	0.29	-0.06	3.81318e-06	0.000293827	0.591363	17	21.1	21.1
C030006K11Rik	0.16	0.25	0.29	0.04	0.011006	0.00490061		13.6	15.2	15.2
Klhl36	0.25	0.19	0.29	0.11	0.00772154	3.83252e-05	0.222981	20.9	20.4	20.4
Ypel4	0.22	0.26	0.29	0.03	0.000731572	0.00023416	0.786967	18.1	19.2	19.2
Tasp1	0.79	0.26	0.29	0.03	6.07934e-07	5.23833e-08	0.661485	42.3	44.3	44.3
Lyplal1	0.29	0.19	0.29	0.1	0.00212259	4.67472e-06	0.201416	24.3	23.9	23.9
Cstf1	0.17	0.27	0.29	0.03	0.00505915	0.0030647		14	16.1	16.1
Fndc3b	3.74	0.15	0.29	0.14	6.10554e-09	1.57379e-29	1.43568e-07	91.9	90.6	90.6
Armt1	0.26	0.28	0.29	0.01	0.000108415	0.00010437	0.92294	20.4	21.5	21.5
Eri2	0.29	0.39	0.29	-0.1	3.33946e-08	9.88599e-05	0.299415	20.6	23.4	23.4
Pcgf6	0.23	0.24	0.29	0.05	0.00307987	0.000467	0.660011	17.7	18.6	18.6
Mkrn1	0.88	0.2	0.29	0.09	4.13074e-07	2.50922e-13	0.0407802	56.4	56.7	56.7
Zfp367	0.42	0.8	0.29	-0.51	5.43089e-36	4.52413e-05	6.62446e-14	28	31.7	31.7
Srsf2	2.54	0.4	0.29	-0.11	1.87898e-53	3.47262e-25	0.000110579	87.8	89	89
Mtx2	0.76	0.16	0.29	0.13	0.000171818	3.11284e-11	0.00882373	50.2	50.5	50.5
Tmem67	0.26	0.35	0.29	-0.06	3.86306e-06	0.000255291	0.612908	18.7	21.7	21.7
Tdrd7	0.62	0.37	0.29	-0.08	1.87624e-12	2.30218e-07	0.245945	37.7	40.3	40.3
Ctsf	1.64	0.09	0.29	0.2	0.00307814	1.56006e-24	4.79974e-12	80	76	76
Gm15834	0.17	0.24	0.29	0.05	0.0391593	0.0164574		11.9	13.3	13.3
Gm38948	0.12	0.23	0.29	0.06	0.0976395	0.0470407		9.6	10.3	10.3
Rfc5	0.11	0.36	0.29	-0.07	0.0139245	0.0651056		8	11.6	11.6
Pold1	0.1	0.41	0.29	-0.12	0.0132443	0.0988594		6.6	11	11
Ccdc115	0.38	0.27	0.29	0.02	1.16918e-07	4.0154e-08	0.799496	30.4	32.4	32.4
Letmd1	0.23	0.2	0.29	0.09	0.0080412	0.000132529	0.337104	19.4	19.2	19.2
Tbl3	0.25	0.36	0.29	-0.07	3.00464e-07	9.23126e-05	0.491354	18.6	22.7	22.7
Ccdc107	1.17	0.1	0.29	0.19	0.00288021	3.94793e-18	8.18646e-08	68	65.6	65.6
Lyrm4	0.23	0.32	0.29	-0.03	4.77369e-05	0.000526418	0.80134	16.7	20.2	20.2
Eif4a3	0.87	0.38	0.29	-0.09	2.49068e-23	8.60428e-13	0.0588416	54.9	59.3	59.3
Dnttip2	0.8	0.32	0.29	-0.03	7.69334e-15	4.9995e-11	0.581872	51.2	53.7	53.7
Pola1	1	0.59	0.29	-0.3	1.04274e-23	8.28598e-06	2.46752e-06	43.1	43.4	43.4
Mfsd10	0.36	0.33	0.29	-0.04	2.41411e-10	1.13535e-07	0.625985	29.1	31.9	31.9
Gpr108	0.66	0.21	0.29	0.08	2.33784e-06	9.21312e-11	0.115275	47.3	47	47
Zswim7	0.42	0.2	0.29	0.09	0.000231656	1.97332e-07	0.188735	32.6	31.8	31.8
Aga	0.56	0.22	0.29	0.07	3.16341e-06	3.15634e-09	0.265171	40.8	41.7	41.7
Tmem159	1.2	0.14	0.29	0.15	9.60619e-05	5.59222e-17	2.99822e-05	67.8	66.1	66.1
Rps6ka2	0.88	0.21	0.29	0.08	3.17187e-05	1.8505e-08	0.207296	47.2	46.3	46.3
Hsd17b2	0.97	0.59	0.29	-0.3	7.69371e-24	7.20452e-06	2.49474e-06	41.4	44.5	44.5
Dpy30	1.13	0.24	0.29	0.05	7.37312e-12	5.6646e-16	0.245605	66.3	64.8	64.8
Tex30	0.13	0.42	0.29	-0.13	0.00197881	0.0496529		8.8	12.6	12.6
Tpst1	0.33	0.29	0.29	0	8.04266e-06	1.74962e-05	0.989599	24.5	26.1	26.1
Rad1	0.2	0.25	0.29	0.04	0.0025554	0.000782098	0.770492	16.3	18.3	18.3
[truncated: 6,875 more rows]
